# Supplementary material
Source: MDPI journal article supplement (https://www.mdpi.com/search?q=jof-07-00207)
Supplement: s001 [file jof-07-00207-s001.pdf]

## Supplementary Materials

Journal of Fungi

### New Method for identifying Fungal Kingdom Enzyme Hotspots from Genome Sequences

Lene Lange<sup>1</sup>, Kristian Barrett<sup>2</sup>, and Anne S. Meyer<sup>2</sup>

<sup>1</sup> BioEconomy, *Research & Advisory*, Copenhagen, 2500 Valby, Denmark; lene.lange2@gmail.com (L.L)

<sup>2</sup> Section for Protein Chemistry and Enzyme Technology, Department of Biotechnology and Biomedicine, Building 221, Technical University of Denmark, DK-2800 Kgs. Lyngby, Denmark; kbaka@dtu.dk (KB), asme@dtu.dk (ASM)

Table S1. List of the rank of all 1.932 fungal species/strains with regard to biomass degrading capacity based on bioinformatics analysis of their genome sequence. The species are ranked with regard to the Total number of “Function;Family” observations, yet specifying the total number of “Function;Family” observations in each substrate category. The data shown is the full list of data supporting Table 1 in the main manuscript.

| No | Species                           | Class           | Phylum    | ACC       |        |       |        |       | Submitter       |                                                     |
|----|-----------------------------------|-----------------|-----------|-----------|--------|-------|--------|-------|-----------------|-----------------------------------------------------|
|    |                                   |                 |           | Cellulose | Pectin | Xylan | Lignin | Total |                 |                                                     |
| 1  | <i>Pecoramyces ruminatium</i>     | Neocallimastigo | Chytridio | 248       | 85     | 208   | 0      | 541   | GCA_000412615.1 | Oklahoma State University                           |
| 2  | <i>Neocallimastix californiae</i> | Neocallimastigo | Chytridio | 232       | 122    | 172   | 0      | 526   | GCA_002104975.1 | DOE Joint Genome Institute                          |
| 3  | <i>Mycena citricolor</i>          | Agarico         | Basidio   | 91        | 204    | 50    | 149    | 494   | GCA_003987915.1 | Universidade de Sao Paulo                           |
| 4  | <i>Verticillium longisporum</i>   | Sordario        | Asco      | 139       | 176    | 74    | 95     | 484   | GCA_001268165.1 | SLU                                                 |
| 5  | <i>Coniochaeta sp. 2T2.1</i>      | Sordario        | Asco      | 117       | 102    | 108   | 98     | 425   | GCA_009194965.1 | DOE Joint Genome Institute                          |
| 6  | <i>Paramyrothecium roridum</i>    | Sordario        | Asco      | 106       | 163    | 63    | 79     | 411   | GCA_003012165.1 | USDA, ARS, NCAUR                                    |
| 7  | <i>Cadophora sp. DSE1049</i>      | Leotio          | Asco      | 105       | 138    | 75    | 91     | 409   | GCA_003073865.1 | DOE Joint Genome Institute                          |
| 8  | <i>Diaporthe ampelina</i>         | Sordario        | Asco      | 116       | 129    | 58    | 97     | 400   | GCA_001630405.1 | Bangalore University                                |
| 9  | <i>Diaporthe longicolla</i>       | Sordario        | Asco      | 111       | 128    | 56    | 90     | 385   | GCA_000800745.1 | Purdue University                                   |
| 10 | <i>Diaporthe sp. NJD1</i>         | Sordario        | Asco      | 111       | 118    | 58    | 94     | 381   | GCA_013842865.1 | Anhui Agricultural University                       |
| 11 | <i>Diaporthe capsici</i>          | Sordario        | Asco      | 107       | 118    | 58    | 93     | 376   | GCA_013364905.1 | Sichuan agricultural university                     |
| 12 | <i>Diaporthe sp. HANT25</i>       | Sordario        | Asco      | 106       | 123    | 57    | 88     | 374   | GCA_013435955.1 | Faculty of Science, Mahidol University              |
| 13 | <i>Lachnum nothofagi</i>          | Leotio          | Asco      | 92        | 124    | 60    | 95     | 371   | GCA_003988875.1 | Manaaki Whenua Landcare Research                    |
| 14 | <i>Colletotrichum camelliae</i>   | Sordario        | Asco      | 90        | 139    | 65    | 77     | 371   | GCA_011947485.1 | Central South University of Forestry and Technology |

|    |                                       |          |         |    |     |    |     |     |                 |                                                                                    |
|----|---------------------------------------|----------|---------|----|-----|----|-----|-----|-----------------|------------------------------------------------------------------------------------|
| 15 | <i>Colletotrichum truncatum</i>       | Sordario | Asco    | 90 | 150 | 59 | 72  | 371 | GCA_014235925.1 | University of Salamanca                                                            |
| 16 | <i>Colletotrichum sp. COLG25</i>      | Sordario | Asco    | 90 | 139 | 63 | 76  | 368 | GCA_009801095.1 | University of Agriculture,<br>Faisalabad Pakistan.                                 |
| 17 | <i>Colletotrichum tropicale</i>       | Sordario | Asco    | 89 | 139 | 63 | 77  | 368 | GCA_013201785.1 | RIKEN                                                                              |
| 18 | <i>Colletotrichum fructicola</i>      | Sordario | Asco    | 89 | 137 | 62 | 77  | 365 | GCA_000319635.2 | RIKEN Plant Science Center                                                         |
| 19 | <i>Colletotrichum asianum</i>         | Sordario | Asco    | 89 | 136 | 61 | 78  | 364 | GCA_009806415.1 | Northwest A&F University                                                           |
| 20 | <i>Phialocephala subalpina</i>        | Leotio   | Asco    | 96 | 118 | 62 | 87  | 363 | GCA_900073065.1 | Institute of Bioinformatics and<br>Systems Biology                                 |
| 21 | <i>Pestalotiopsis fici</i>            | Sordario | Asco    | 92 | 128 | 63 | 80  | 363 | GCA_000516985.1 | Institute of microbiology,<br>chinese academy of sciences                          |
| 22 | <i>Colletotrichum siamense</i>        | Sordario | Asco    | 87 | 137 | 62 | 76  | 362 | GCA_013390195.1 | RIKEN                                                                              |
| 23 | <i>Colletotrichum gloeosporioides</i> | Sordario | Asco    | 90 | 134 | 59 | 76  | 359 | GCA_003243855.1 | Nanjing Forestry University                                                        |
| 24 | <i>Colletotrichum viniferum</i>       | Sordario | Asco    | 88 | 135 | 59 | 77  | 359 | GCA_013201765.1 | RIKEN                                                                              |
| 25 | <i>Neopestalotiopsis sp. 37M</i>      | Sordario | Asco    | 96 | 118 | 54 | 89  | 357 | GCA_011058875.1 | University of Campinas                                                             |
| 26 | <i>Colletotrichum sp. COLG31</i>      | Sordario | Asco    | 92 | 132 | 55 | 78  | 357 | GCA_009800995.1 | University of Agriculture,<br>Faisalabad Pakistan.                                 |
| 27 | <i>Colletotrichum karsti</i>          | Sordario | Asco    | 90 | 139 | 57 | 71  | 357 | GCA_011947395.1 | Central South University of<br>Forestry and Technology                             |
| 28 | <i>Colletotrichum aenigma</i>         | Sordario | Asco    | 86 | 131 | 62 | 75  | 354 | GCA_013390185.1 | RIKEN                                                                              |
| 29 | <i>Memnoniella echinata</i>           | Sordario | Asco    | 99 | 123 | 60 | 67  | 349 | GCA_001599555.1 | RIKEN Center for Life Science<br>Technologies, Division of<br>Genomic Technologies |
| 30 | <i>Aspergillus latus</i>              | Eurotio  | Asco    | 95 | 137 | 53 | 58  | 343 | GCA_013306195.1 | Vanderbilt University                                                              |
| 31 | <i>Clonostachys rosea</i>             | Sordario | Asco    | 95 | 121 | 67 | 56  | 339 | GCA_000963775.2 | Chinese Academy of<br>Agricultural Sciences                                        |
| 32 | <i>Colletotrichum tofieldiae</i>      | Sordario | Asco    | 89 | 116 | 57 | 71  | 333 | GCA_001618725.1 | Max Planck Genome Center<br>Cologne                                                |
| 33 | <i>Colletotrichum musicola</i>        | Sordario | Asco    | 86 | 125 | 53 | 67  | 331 | GCA_014235935.1 | University of Salamanca                                                            |
| 34 | <i>Colletotrichum musae</i>           | Sordario | Asco    | 82 | 118 | 52 | 77  | 329 | GCA_002814275.1 | CAPES                                                                              |
| 35 | <i>Exidia glandulosa</i>              | Agarico  | Basidio | 82 | 61  | 70 | 114 | 327 | GCA_001632375.1 | DOE Joint Genome Institute                                                         |
| 36 | <i>Nectria sp. B-13</i>               | Sordario | Asco    | 94 | 124 | 59 | 50  | 327 | GCA_002682825.1 | Anhui University                                                                   |
| 37 | <i>Colletotrichum scovillei</i>       | Sordario | Asco    | 83 | 118 | 57 | 69  | 327 | GCA_011075155.1 | Tianjin Institute of Plant<br>Protection                                           |
| 38 | <i>Colletotrichum simmondsii</i>      | Sordario | Asco    | 81 | 118 | 59 | 66  | 324 | GCA_001563135.1 | Universidad de Salamanca                                                           |
| 39 | <i>Chalara longipes</i>               | Leotio   | Asco    | 94 | 82  | 69 | 79  | 324 | GCA_009732865.1 | DOE Joint Genome Institute                                                         |
| 40 | <i>Colletotrichum plurivorum</i>      | Sordario | Asco    | 82 | 125 | 49 | 67  | 323 | GCA_014235945.1 | University of Salamanca                                                            |
| 41 | <i>Colletotrichum acutatum</i>        | Sordario | Asco    | 82 | 115 | 57 | 69  | 323 | GCA_001593745.1 | Seoul National University                                                          |
| 42 | <i>Diaporthe aspalathi</i>            | Sordario | Asco    | 90 | 108 | 47 | 78  | 323 | GCA_001447215.1 | Beltsville Agricultural Research<br>Center                                         |
| 43 | <i>Pestalotiopsis sp. JCM 9685</i>    | Sordario | Asco    | 89 | 104 | 49 | 81  | 323 | GCA_001599175.1 | RIKEN Center for Life Science<br>Technologies, Division of<br>Genomic Technologies |
| 44 | <i>Colletotrichum incanum</i>         | Sordario | Asco    | 85 | 115 | 54 | 68  | 322 | GCA_001625285.1 | Max Planck Genome Center<br>Cologne                                                |

|    |                                        |          |         |     |     |    |     |     |                 |                                                                                                   |
|----|----------------------------------------|----------|---------|-----|-----|----|-----|-----|-----------------|---------------------------------------------------------------------------------------------------|
| 45 | <i>Verticillium zaregamsianum</i>      | Sordario | Asco    | 100 | 124 | 49 | 47  | 320 | GCA_002851755.1 | Wageningen University & Research                                                                  |
| 46 | <i>Colletotrichum nymphaeae</i>        | Sordario | Asco    | 80  | 116 | 57 | 66  | 319 | GCA_001563115.1 | Universidad de Salamanca                                                                          |
| 47 | <i>Colletotrichum coccodes</i>         | Sordario | Asco    | 85  | 114 | 52 | 67  | 318 | GCA_002249775.1 | USDA-ARS                                                                                          |
| 48 | <i>Colletotrichum fioriniae</i>        | Sordario | Asco    | 79  | 117 | 55 | 66  | 317 | GCA_002930455.1 | VIB                                                                                               |
| 49 | <i>Colletotrichum sojae</i>            | Sordario | Asco    | 79  | 121 | 51 | 65  | 316 | GCA_014235955.1 | University of Salamanca                                                                           |
| 50 | <i>Calonectria naviculata</i>          | Sordario | Asco    | 86  | 117 | 53 | 58  | 314 | GCA_003031705.1 | USDA-ARS                                                                                          |
| 51 | <i>Ilyonectria destructans</i>         | Sordario | Asco    | 92  | 120 | 40 | 62  | 314 | GCA_001913115.1 | Northeast Normal University                                                                       |
| 52 | <i>Hyaloscypha variabilis</i>          | Leotio   | Asco    | 91  | 85  | 64 | 73  | 313 | GCA_002865655.1 | DOE Joint Genome Institute<br>Jet Propulsion Laboratory,<br>California Institute of<br>Technology |
| 53 | <i>Byssochlamys sp. IMV 00045</i>      | Eurotio  | Asco    | 88  | 103 | 54 | 66  | 311 | GCA_001931905.2 | US Department of Agriculture,<br>Agriculture Research Service                                     |
| 54 | <i>Fusarium sp. NRRL 22101</i>         | Sordario | Asco    | 92  | 104 | 46 | 67  | 309 | GCA_013010345.1 | Universidad de Salamanca                                                                          |
| 55 | <i>Colletotrichum salicis</i>          | Sordario | Asco    | 77  | 114 | 48 | 68  | 307 | GCA_001563125.1 | RIKEN Center for Life Science<br>Technologies, Division of<br>Genomic Technologies                |
| 56 | <i>Gliomastix tumulicola</i>           | Sordario | Asco    | 83  | 108 | 63 | 53  | 307 | GCA_001599755.1 | US Department of Agriculture,<br>Agriculture Research Service                                     |
| 57 | <i>Fusarium decemcellulare</i>         | Sordario | Asco    | 76  | 119 | 50 | 62  | 307 | GCA_013266205.1 | AIT-Austrian Institute of<br>Technology                                                           |
| 58 | <i>Dactylonectria torresensis</i>      | Sordario | Asco    | 78  | 128 | 48 | 52  | 306 | GCA_011426275.1 | FABI                                                                                              |
| 59 | <i>Calonectria pseudoturangelicola</i> | Sordario | Asco    | 85  | 110 | 52 | 58  | 305 | GCA_013403825.1 | National Institute of Biological<br>Resources                                                     |
| 60 | <i>Colletotrichum sp. JS-367</i>       | Sordario | Asco    | 80  | 109 | 52 | 64  | 305 | GCA_003122705.1 | INAIL-Research Area                                                                               |
| 61 | <i>Penicillium sp. CF01</i>            | Eurotio  | Asco    | 88  | 110 | 37 | 67  | 302 | GCA_005250745.1 | Wageningen University &<br>Research                                                               |
| 62 | <i>Verticillium klebahnii</i>          | Sordario | Asco    | 90  | 116 | 49 | 46  | 301 | GCA_002851715.1 | KLEF Deemed to be University                                                                      |
| 63 | <i>Colletotrichum capsici</i>          | Sordario | Asco    | 74  | 120 | 52 | 55  | 301 | GCA_011947275.1 | UNIVERSITY OF BRISTOL                                                                             |
| 64 | <i>Corynespora cassiicola</i>          | Dothideo | Asco    | 81  | 100 | 44 | 76  | 301 | GCA_900169545.1 | Nakdonggang National Institute<br>of Biological Resources                                         |
| 65 | <i>Articulospora tetracladia</i>       | Leotio   | Asco    | 75  | 122 | 46 | 58  | 301 | GCA_003415645.1 | USDA-ARS                                                                                          |
| 66 | <i>Dactylonectria macrodidyma</i>      | Sordario | Asco    | 76  | 123 | 49 | 52  | 300 | GCA_000935225.1 | University of California,<br>Riverside                                                            |
| 67 | <i>Hortaea werneckii</i>               | Dothideo | Asco    | 80  | 98  | 62 | 59  | 299 | GCA_002127715.1 | Wageningen University &<br>Research                                                               |
| 68 | <i>Verticillium albo-atrum</i>         | Sordario | Asco    | 92  | 114 | 46 | 47  | 299 | GCA_002851705.1 | RIKEN                                                                                             |
| 69 | <i>Colletotrichum trifolii</i>         | Sordario | Asco    | 74  | 116 | 49 | 60  | 299 | GCA_004367215.1 | UC Davis                                                                                          |
| 70 | <i>Phaeoacremonium minimum</i>         | Sordario | Asco    | 84  | 94  | 63 | 57  | 298 | GCA_000392275.1 | Kunming University of Science<br>and Technology                                                   |
| 71 | <i>Hymenopellis chiangmaiae</i>        | Agarico  | Basidio | 77  | 70  | 44 | 104 | 295 | GCA_003314085.1 | Seoul National University                                                                         |
| 72 | <i>Fusarium sp. JS1030</i>             | Sordario | Asco    | 72  | 110 | 53 | 60  | 295 | GCA_000966855.1 | Wageningen University &<br>Research                                                               |
| 73 | <i>Verticillium tricorpus</i>          | Sordario | Asco    | 86  | 114 | 50 | 45  | 295 | GCA_002851695.1 |                                                                                                   |

|     |                                                  |                 |           |     |     |     |    |     |                 |                                                            |
|-----|--------------------------------------------------|-----------------|-----------|-----|-----|-----|----|-----|-----------------|------------------------------------------------------------|
| 74  | <i>Pezicula radiculicola</i>                     | Leotio          | Asco      | 78  | 103 | 30  | 83 | 294 | GCA_003008705.1 | The University of Texas Health Science Center at Houston   |
| 75  | <i>Colletotrichum destructivum</i>               | Sordario        | Asco      | 77  | 110 | 46  | 61 | 294 | GCA_009900065.1 | Chinese Academy of Agricultural Sciences                   |
| 76  | <i>Verticillium isaacii</i>                      | Sordario        | Asco      | 87  | 112 | 50  | 45 | 294 | GCA_002851775.1 | Wageningen University & Research                           |
| 77  | <i>Colletotrichum sidae</i>                      | Sordario        | Asco      | 73  | 114 | 47  | 59 | 293 | GCA_004367935.1 | RIKEN                                                      |
| 78  | <i>Colletotrichum spinosum</i>                   | Sordario        | Asco      | 74  | 113 | 47  | 59 | 293 | GCA_004366825.1 | RIKEN                                                      |
| 79  | <i>Zopfia rhizophila</i>                         | Dothideo        | Asco      | 85  | 78  | 56  | 74 | 293 | GCA_010093925.1 | DOE Joint Genome Institute                                 |
| 80  | <i>Aspergillus sp. MA 6041</i>                   | Eurotio         | Asco      | 78  | 104 | 46  | 64 | 292 | GCA_003138005.1 | University of Natural Resources and Life Sciences, Vienna  |
| 81  | <i>Ophiognomonium clavignenti-juglandacearum</i> | Sordario        | Asco      | 77  | 94  | 46  | 75 | 292 | GCA_003671545.1 | Colorado State U                                           |
| 82  | <i>Piromyces sp. E2</i>                          | Neocallimastigo | Chytridio | 128 | 47  | 117 | 0  | 292 | GCA_002157105.1 | JGI                                                        |
| 83  | <i>Calonectria leucothoes</i>                    | Sordario        | Asco      | 77  | 105 | 51  | 58 | 291 | GCA_002179835.1 | USDA-ARS                                                   |
| 84  | <i>Colletotrichum orbiculare</i>                 | Sordario        | Asco      | 71  | 114 | 47  | 59 | 291 | GCA_000350065.2 | RIKEN Plant Science Center                                 |
| 85  | <i>Phialocephala scopiformis</i>                 | Leotio          | Asco      | 80  | 76  | 52  | 80 | 288 | GCA_001500285.1 | DOE Joint Genome Institute                                 |
| 86  | <i>Pseudopyrenochaeta lycopersici</i>            | Dothideo        | Asco      | 86  | 90  | 43  | 67 | 286 | GCA_003313425.1 | University of Verona                                       |
| 87  | <i>Colletotrichum higginsianum</i>               | Sordario        | Asco      | 74  | 108 | 42  | 60 | 284 | GCA_001672515.1 | GATC Biotech AG                                            |
| 88  | <i>Xylaria striata</i>                           | Sordario        | Asco      | 76  | 81  | 53  | 72 | 282 | GCA_002749545.1 | Zhejiang University                                        |
| 89  | <i>Calonectria fujianensis</i>                   | Sordario        | Asco      | 77  | 105 | 44  | 56 | 282 | GCA_013406965.1 | FABI                                                       |
| 90  | <i>Nigrograna mackinnonii</i>                    | Dothideo        | Asco      | 87  | 63  | 55  | 77 | 282 | GCA_001007845.1 | Yale University                                            |
| 91  | <i>Pseudogymnoascus sp. VKM F-4519 (FW-2642)</i> | Leotio          | Asco      | 77  | 102 | 62  | 40 | 281 | GCA_000750935.1 | Moscow State University                                    |
| 92  | <i>Fusarium sp. NRRL 66182</i>                   | Sordario        | Asco      | 67  | 110 | 53  | 50 | 280 | GCA_013266265.1 | US Department of Agriculture, Agriculture Research Service |
| 93  | <i>Calonectria honghensis</i>                    | Sordario        | Asco      | 77  | 104 | 45  | 54 | 280 | GCA_013403855.1 | FABI                                                       |
| 94  | <i>Diaporthe helianthi</i>                       | Sordario        | Asco      | 77  | 96  | 45  | 62 | 280 | GCA_001702395.2 | University of Western Brittany                             |
| 95  | <i>Fusarium oxysporum</i>                        | Sordario        | Asco      | 74  | 101 | 49  | 55 | 279 | GCA_002233775.1 | University of Amsterdam                                    |
| 96  | <i>Calonectria aciculata</i>                     | Sordario        | Asco      | 76  | 103 | 46  | 54 | 279 | GCA_013406995.1 | FABI                                                       |
| 97  | <i>Ilyonectria mors-panacis</i>                  | Sordario        | Asco      | 80  | 108 | 40  | 51 | 279 | GCA_002991585.1 | Zhejiang Sci-Tech University                               |
| 98  | <i>Calonectria pseudoreteauidii</i>              | Sordario        | Asco      | 78  | 101 | 43  | 56 | 278 | GCA_001879505.1 | Fujian Agriculture and Forestry University                 |
| 99  | <i>Fusarium nematophilum</i>                     | Sordario        | Asco      | 75  | 107 | 44  | 51 | 277 | GCA_013623595.1 | US Department of Agriculture, Agriculture Research Service |
| 100 | <i>Colletotrichum chlorophyti</i>                | Sordario        | Asco      | 67  | 111 | 42  | 57 | 277 | GCA_001937105.1 | RIKEN                                                      |
| 101 | <i>Fusarium oxysporum</i>                        | Sordario        | Asco      | 72  | 98  | 51  | 54 | 275 | GCA_001652425.1 | CSIRO                                                      |
| 102 | <i>Cairneyella variabilis</i>                    | Leotio          | Asco      | 76  | 88  | 39  | 71 | 274 | GCA_001625345.1 | CSIRO                                                      |
| 103 | <i>Coleophoma cylindrospora</i>                  | Leotio          | Asco      | 79  | 103 | 27  | 64 | 273 | GCA_003369665.1 | The University of Texas Health Science Center at Houston   |
| 104 | <i>Stagonosporopsis tanacetii</i>                | Dothideo        | Asco      | 60  | 111 | 46  | 55 | 272 | GCA_000812845.1 | The University of Melbourne                                |
| 105 | <i>Fusarium oxysporum</i>                        | Sordario        | Asco      | 66  | 97  | 49  | 58 | 270 | GCA_005930515.1 | RIKEN                                                      |
| 106 | <i>Paraphaeosphaeria sporulosa</i>               | Dothideo        | Asco      | 74  | 80  | 52  | 64 | 270 | GCA_001642045.1 | DOE Joint Genome Institute                                 |

|     |                                                  |          |         |    |     |    |     |     |                 |                                                                              |
|-----|--------------------------------------------------|----------|---------|----|-----|----|-----|-----|-----------------|------------------------------------------------------------------------------|
| 107 | <i>Fusarium oxysporum</i>                        | Sordario | Asco    | 70 | 93  | 48 | 58  | 269 | GCA_012610815.1 | Contact; Kurt. A. Zeller, USDA-APHIS-PPQ-S&T                                 |
| 108 | <i>[Nectria] haematococca</i>                    | Sordario | Asco    | 79 | 97  | 44 | 49  | 269 | GCA_010015875.1 | Lishui University                                                            |
| 109 | <i>Pseudogymnoascus sp. VKM F-4520 (FW-2644)</i> | Leotio   | Asco    | 80 | 94  | 51 | 44  | 269 | GCA_000750995.1 | Moscow State University                                                      |
| 110 | <i>Colletotrichum sansevieriae</i>               | Sordario | Asco    | 69 | 100 | 43 | 57  | 269 | GCA_002749775.1 | Kagoshima University                                                         |
| 111 | <i>Oidiodendron maius</i>                        | Leotio   | Asco    | 66 | 100 | 51 | 51  | 268 | GCA_000827325.1 | JGI                                                                          |
| 112 | <i>Fusarium oxysporum</i>                        | Sordario | Asco    | 71 | 100 | 48 | 49  | 268 | GCA_001702785.1 | University of Amsterdam                                                      |
| 113 | <i>Fusarium sp. NRRL 62610</i>                   | Sordario | Asco    | 82 | 92  | 40 | 54  | 268 | GCA_013186425.2 | US Department of Agriculture, Agriculture Research Service                   |
| 114 | <i>Fusarium oxysporum</i>                        | Sordario | Asco    | 75 | 91  | 46 | 55  | 267 | GCA_000260075.2 | Broad Institute                                                              |
| 115 | <i>Fusarium oxysporum</i>                        | Sordario | Asco    | 68 | 99  | 51 | 49  | 267 | GCA_003615085.1 | NIAB-EMR                                                                     |
| 116 | <i>Cudoniella acicularis</i>                     | Leotio   | Asco    | 77 | 70  | 46 | 74  | 267 | GCA_013054445.1 | TU Dresden - IHI Zittau                                                      |
| 117 | <i>Beverwykella pulmonaria</i>                   | Dothideo | Asco    | 87 | 60  | 44 | 76  | 267 | GCA_001599595.1 | RIKEN Center for Life Science Technologies, Division of Genomic Technologies |
| 118 | <i>Margaritispora aquatica</i>                   | Leotio   | Asco    | 63 | 112 | 42 | 50  | 267 | GCA_007644065.1 | Nakdonggang National Institute of Biological Resources                       |
| 119 | <i>Eutypa lata</i>                               | Sordario | Asco    | 82 | 68  | 44 | 72  | 266 | GCA_000349385.1 | UC Davis                                                                     |
| 120 | <i>Pleosporales sp. UM 1110 2012</i>             | Dothideo | Asco    | 80 | 64  | 57 | 65  | 266 | GCA_000263175.2 | UNIVERSITY OF MALAYA                                                         |
| 121 | <i>Fusarium oxysporum</i>                        | Sordario | Asco    | 71 | 93  | 46 | 55  | 265 | GCA_001703215.1 | University of Amsterdam                                                      |
| 122 | <i>Pyrenochaeta sp. DS3sAY3a</i>                 | Dothideo | Asco    | 80 | 81  | 43 | 61  | 265 | GCA_001644535.1 | DOE Joint Genome Institute                                                   |
| 123 | <i>Fusarium oxysporum</i>                        | Sordario | Asco    | 68 | 92  | 50 | 54  | 264 | GCA_002234045.1 | University of Amsterdam                                                      |
| 124 | <i>Calonectria crousiana</i>                     | Sordario | Asco    | 69 | 97  | 46 | 52  | 264 | GCA_013406985.1 | FABI                                                                         |
| 125 | <i>Paraphoma sp. B47-9</i>                       | Dothideo | Asco    | 76 | 84  | 38 | 66  | 264 | GCA_001748405.1 | National Institute for Agro-Environmental Sciences (NIAES)                   |
| 126 | <i>Fusarium oxysporum</i>                        | Sordario | Asco    | 66 | 94  | 52 | 51  | 263 | GCA_000260155.3 | Broad Institute                                                              |
| 127 | <i>Stenocarpella maydis</i>                      | Sordario | Asco    | 80 | 71  | 50 | 62  | 263 | GCA_002270565.1 | University of Arkansas                                                       |
| 128 | <i>Fusarium metavorans</i>                       | Sordario | Asco    | 78 | 94  | 39 | 52  | 263 | GCA_001633045.1 | USDA-ARS                                                                     |
| 129 | <i>Fusarium oxysporum</i>                        | Sordario | Asco    | 68 | 94  | 49 | 51  | 262 | GCA_001702645.1 | University of Amsterdam                                                      |
| 130 | <i>Fusarium sp. NRRL 62957</i>                   | Sordario | Asco    | 75 | 92  | 39 | 56  | 262 | GCA_012978535.1 | US Department of Agriculture, Agriculture Research Service                   |
| 131 | <i>Pseudogymnoascus sp. VKM F-4518 (FW-2643)</i> | Leotio   | Asco    | 82 | 94  | 43 | 43  | 262 | GCA_000750925.1 | Moscow State University                                                      |
| 132 | <i>Ganoderma boninense</i>                       | Agarico  | Basidio | 77 | 36  | 44 | 104 | 261 | GCA_002900995.2 | PT SMART Tbk                                                                 |
| 133 | <i>Periconia macrospinoso</i>                    | Dothideo | Asco    | 89 | 47  | 48 | 77  | 261 | GCA_003073855.1 | DOE Joint Genome Institute                                                   |
| 134 | <i>Fusarium phaseoli</i>                         | Sordario | Asco    | 75 | 94  | 42 | 50  | 261 | GCA_013364925.1 | US Department of Agriculture, Agriculture Research Service                   |
| 135 | <i>Hymenoscyphus salicellus</i>                  | Leotio   | Asco    | 75 | 76  | 41 | 69  | 261 | GCA_001414355.1 | University of Exeter                                                         |
| 136 | <i>Fusarium oxysporum</i>                        | Sordario | Asco    | 68 | 93  | 48 | 51  | 260 | GCA_002233895.1 | University of Amsterdam                                                      |
| 137 | <i>Fusarium oxysporum</i>                        | Sordario | Asco    | 65 | 94  | 48 | 53  | 260 | GCA_003977725.1 | University of California at Davis                                            |
| 138 | <i>Fusarium oxysporum</i>                        | Sordario | Asco    | 67 | 97  | 45 | 51  | 260 | GCA_000260235.2 | Broad Institute                                                              |
| 139 | <i>Fusarium albosuccineum</i>                    | Sordario | Asco    | 64 | 102 | 42 | 52  | 260 | GCA_012931995.1 | US Department of Agriculture, Agriculture Research Service                   |
| 140 | <i>Fusarium oxysporum</i>                        | Sordario | Asco    | 67 | 92  | 49 | 51  | 259 | GCA_001702695.2 | University of Amsterdam                                                      |
| 141 | <i>Stachybotrys chartarum</i>                    | Sordario | Asco    | 86 | 69  | 47 | 57  | 259 | GCA_000732565.1 | UT Southwestern                                                              |

|     |                                       |          |         |    |    |    |    |     |                 |                                                                                           |
|-----|---------------------------------------|----------|---------|----|----|----|----|-----|-----------------|-------------------------------------------------------------------------------------------|
| 142 | <i>Fusarium oxysporum</i>             | Sordario | Asco    | 67 | 94 | 44 | 53 | 258 | GCA_013423245.1 | St. Petersburg University                                                                 |
| 143 | <i>Fusarium neocosmosporiellum</i>    | Sordario | Asco    | 76 | 88 | 42 | 52 | 258 | GCA_006518225.1 | US Department of Agriculture,<br>Agriculture Research Service                             |
| 144 | <i>Colletotrichum lindemuthianum</i>  | Sordario | Asco    | 68 | 96 | 38 | 56 | 258 | GCA_001693025.2 | Universidade Federal de Vicosa                                                            |
| 145 | <i>Fusarium oxysporum</i>             | Sordario | Asco    | 67 | 91 | 49 | 50 | 257 | GCA_002233805.1 | University of Amsterdam                                                                   |
| 146 | <i>Coprinellus micaceus</i>           | Agarico  | Basidio | 74 | 26 | 68 | 89 | 257 | GCA_004369175.1 | DOE Joint Genome Institute                                                                |
| 147 | <i>Fusarium oxysporum</i>             | Sordario | Asco    | 64 | 92 | 47 | 53 | 256 | GCA_009602545.1 | Auburn University                                                                         |
| 148 | <i>Fusarium vanettenii</i>            | Sordario | Asco    | 74 | 90 | 42 | 50 | 256 | GCA_000151355.1 | DOE Joint Genome Institute                                                                |
| 149 | <i>Fusarium oxysporum</i>             | Sordario | Asco    | 67 | 92 | 46 | 50 | 255 | GCA_002234115.1 | University of Amsterdam                                                                   |
| 150 | <i>Fusarium oxysporum</i>             | Sordario | Asco    | 64 | 93 | 46 | 52 | 255 | GCA_002233865.1 | University of Amsterdam                                                                   |
| 151 | <i>Aspergillus calidoustus</i>        | Eurotio  | Asco    | 74 | 95 | 40 | 46 | 255 | GCA_001511075.1 | HKI JENA                                                                                  |
| 152 | <i>Pezizula neosporulosa</i>          | Leotio   | Asco    | 73 | 91 | 27 | 64 | 255 | GCA_009805495.1 | Chinese Academy of Forestry                                                               |
| 153 | <i>Fusarium oxysporum</i>             | Sordario | Asco    | 61 | 95 | 50 | 48 | 254 | GCA_001888865.1 | ZhongKai University of<br>Agriculture and Engineering                                     |
| 154 | <i>Lophiotrema nucula</i>             | Dothideo | Asco    | 72 | 68 | 40 | 74 | 254 | GCA_010015825.1 | DOE Joint Genome Institute                                                                |
| 155 | <i>Colletotrichum shioi</i>           | Sordario | Asco    | 62 | 98 | 42 | 52 | 254 | GCA_006783085.1 | RIKEN                                                                                     |
| 156 | <i>Endocalyx cinctus</i>              | 0        | Asco    | 81 | 60 | 48 | 64 | 253 | GCA_001600455.1 | RIKEN Center for Life Science<br>Technologies, Division of<br>Genomic Technologies        |
| 157 | <i>Fusarium protoensiforme</i>        | Sordario | Asco    | 78 | 89 | 38 | 48 | 253 | GCA_011320165.1 | US Department of Agriculture,<br>Agriculture Research Service                             |
| 158 | <i>Stagonospora sp. SRC1lsM3a</i>     | Dothideo | Asco    | 80 | 52 | 57 | 64 | 253 | GCA_001644525.1 | DOE Joint Genome Institute                                                                |
| 159 | <i>Hymenoscyphus herbarum</i>         | Leotio   | Asco    | 74 | 70 | 42 | 67 | 253 | GCA_001414485.1 | University of Exeter                                                                      |
| 160 | <i>Coleophoma crateriformis</i>       | Leotio   | Asco    | 73 | 93 | 25 | 61 | 252 | GCA_003369635.1 | The University of Texas Health<br>Science Center at Houston                               |
| 161 | <i>Pseudogymnoascus sp. VKM F-103</i> | Leotio   | Asco    | 72 | 88 | 53 | 39 | 252 | GCA_000750895.1 | Moscow State University                                                                   |
| 162 | <i>Fusarium oxysporum</i>             | Sordario | Asco    | 64 | 90 | 48 | 49 | 251 | GCA_013347345.1 | Washington State University<br>Mount Vernon Northwestern<br>Research and Extension Center |
| 163 | <i>Gamarada debralockiae</i>          | Leotio   | Asco    | 65 | 79 | 43 | 63 | 250 | GCA_002803225.1 | Macquarie University                                                                      |
| 164 | <i>Fusarium oxysporum</i>             | Sordario | Asco    | 65 | 89 | 47 | 49 | 250 | GCA_009755825.1 | University of Massachusetts<br>Amherst                                                    |
| 165 | <i>Fusarium oxysporum</i>             | Sordario | Asco    | 63 | 93 | 46 | 48 | 250 | GCA_002234135.1 | University of Amsterdam                                                                   |
| 166 | <i>Fusarium oxysporum</i>             | Sordario | Asco    | 65 | 91 | 47 | 47 | 250 | GCA_002234105.1 | University of Amsterdam                                                                   |
| 167 | <i>Bysothecium circinans</i>          | Dothideo | Asco    | 73 | 74 | 44 | 59 | 250 | GCA_010015675.1 | DOE Joint Genome Institute                                                                |
| 168 | <i>Juglanconis sp. DMW523</i>         | Sordario | Asco    | 76 | 82 | 31 | 60 | 249 | GCA_003013055.1 | USDA-ARS                                                                                  |
| 169 | <i>Pseudomassariella vexata</i>       | Sordario | Asco    | 68 | 87 | 33 | 61 | 249 | GCA_002105095.1 | DOE Joint Genome Institute                                                                |
| 170 | <i>Melanomma pulvis-pyrius</i>        | Dothideo | Asco    | 72 | 62 | 49 | 66 | 249 | GCA_010093585.1 | DOE Joint Genome Institute                                                                |
| 171 | <i>Aaosphaeria arxii</i>              | Dothideo | Asco    | 82 | 65 | 44 | 58 | 249 | GCA_010015735.1 | DOE Joint Genome Institute                                                                |
| 172 | <i>Clavariopsis aquatica</i>          | Sordario | Asco    | 79 | 61 | 42 | 67 | 249 | GCA_013620735.1 | Leibniz-Institute of Freshwater<br>Ecology and Inland Fisheries                           |
| 173 | <i>Fusarium fracticaudum</i>          | Sordario | Asco    | 59 | 87 | 56 | 46 | 248 | GCA_003353625.1 | Forestry and Agricultural<br>Biotechnology Institute,<br>University of Pretoria           |

|     |                                        |          |         |    |    |    |    |     |                 |                                                                |
|-----|----------------------------------------|----------|---------|----|----|----|----|-----|-----------------|----------------------------------------------------------------|
| 174 | <i>Fusarium tuaranense</i>             | Sordario | Asco    | 72 | 88 | 40 | 48 | 248 | GCA_013363205.1 | US Department of Agriculture,<br>Agriculture Research Service  |
| 175 | <i>Fusarium sp. NRRL 62941</i>         | Sordario | Asco    | 74 | 85 | 40 | 49 | 248 | GCA_012978555.1 | US Department of Agriculture,<br>Agriculture Research Service  |
| 176 | <i>Fusarium newnesense</i>             | Sordario | Asco    | 59 | 83 | 51 | 54 | 247 | GCA_013184375.1 | US Department of Agriculture,<br>Agriculture Research Service  |
| 177 | <i>Arthrinium phaeospermum</i>         | Sordario | Asco    | 78 | 54 | 52 | 63 | 247 | GCA_006503535.1 | Sichuan Agricultural University                                |
| 178 | <i>Fusarium sterilihyphosum</i>        | Sordario | Asco    | 58 | 88 | 52 | 49 | 247 | GCA_013186845.1 | US Department of Agriculture,<br>Agriculture Research Service  |
| 179 | <i>Clohesyomyces aquaticus</i>         | Dothideo | Asco    | 75 | 49 | 52 | 71 | 247 | GCA_002105025.1 | DOE Joint Genome Institute                                     |
| 180 | <i>Hymenoscyphus fructigenus</i>       | Leotio   | Asco    | 70 | 69 | 42 | 66 | 247 | GCA_001414455.1 | University of Exeter                                           |
| 181 | <i>Fusarium oxysporum</i>              | Sordario | Asco    | 62 | 92 | 45 | 47 | 246 | GCA_000350345.1 | BGI                                                            |
| 182 | <i>Fusarium sarcochroum</i>            | Sordario | Asco    | 63 | 96 | 41 | 46 | 246 | GCA_013266185.1 | US Department of Agriculture,<br>Agriculture Research Service  |
| 183 | <i>Neofusicoccum cordaticola</i>       | Dothideo | Asco    | 64 | 84 | 30 | 68 | 246 | GCA_009830905.1 | University of Pretoria                                         |
| 184 | <i>Pseudogymnoascus sp. 24MN13</i>     | Leotio   | Asco    | 72 | 89 | 49 | 36 | 246 | GCA_001662595.1 | US Forest Service                                              |
| 185 | <i>Fusarium pseudocircinatum</i>       | Sordario | Asco    | 60 | 87 | 48 | 50 | 245 | GCA_013396035.1 | US Department of Agriculture,<br>Agriculture Research Service  |
| 186 | <i>Fusarium sp. NRRL 62944</i>         | Sordario | Asco    | 74 | 88 | 37 | 46 | 245 | GCA_013186395.1 | US Department of Agriculture,<br>Agriculture Research Service  |
| 187 | <i>Pseudogymnoascus verrucosus</i>     | Leotio   | Asco    | 68 | 89 | 51 | 37 | 245 | GCA_001662655.1 | US Forest Service                                              |
| 188 | <i>Pseudogymnoascus sp. 04NY16</i>     | Leotio   | Asco    | 72 | 90 | 48 | 35 | 245 | GCA_001630575.1 | Ohio State University                                          |
| 189 | <i>Aquanectria penicillioides</i>      | Sordario | Asco    | 70 | 98 | 38 | 39 | 245 | GCA_003415625.1 | Nakdonggang National Institute<br>of Biological Resources      |
| 190 | <i>Trematosphaeria pertusa</i>         | Dothideo | Asco    | 72 | 60 | 44 | 69 | 245 | GCA_010094035.1 | DOE Joint Genome Institute                                     |
| 191 | <i>Fusarium oxysporum</i>              | Sordario | Asco    | 64 | 91 | 39 | 50 | 244 | GCA_014154955.1 | University of Amsterdam                                        |
| 192 | <i>Fusarium sp. NRRL 25303</i>         | Sordario | Asco    | 60 | 86 | 49 | 49 | 244 | GCA_013396255.1 | US Department of Agriculture,<br>Agriculture Research Service  |
| 193 | <i>Fusarium oxysporum</i>              | Sordario | Asco    | 63 | 86 | 46 | 49 | 244 | GCA_001703455.1 | University of Amsterdam                                        |
| 194 | <i>Neofusicoccum kwambonambiense</i>   | Dothideo | Asco    | 62 | 84 | 31 | 67 | 244 | GCA_009829855.1 | University of Pretoria                                         |
| 195 | <i>Pseudogymnoascus sp. VKM F-3775</i> | Leotio   | Asco    | 66 | 86 | 52 | 40 | 244 | GCA_000750715.1 | Moscow State University<br>Wageningen University &<br>Research |
| 196 | <i>Verticillium nubilum</i>            | Sordario | Asco    | 72 | 95 | 37 | 40 | 244 | GCA_002851675.1 | US Department of Agriculture,<br>Agriculture Research Service  |
| 197 | <i>Fusarium sp. NRRL 66088</i>         | Sordario | Asco    | 77 | 86 | 36 | 44 | 243 | GCA_013186415.1 | US Department of Agriculture,<br>Agriculture Research Service  |
| 198 | <i>Fusarium sp. NRRL 25184</i>         | Sordario | Asco    | 63 | 78 | 51 | 51 | 243 | GCA_013755755.1 | US Department of Agriculture,<br>Agriculture Research Service  |
| 199 | <i>Neofusicoccum parvum</i>            | Dothideo | Asco    | 62 | 85 | 30 | 66 | 243 | GCA_000385595.1 | UC Davis                                                       |
| 200 | <i>Hymenopellis radicata</i>           | Agarico  | Basidio | 58 | 55 | 34 | 96 | 243 | GCA_003314005.1 | Kunming University of Science<br>and Technology                |
| 201 | <i>Hymenotorrendiella dingleyae</i>    | Leotio   | Asco    | 69 | 68 | 40 | 66 | 243 | GCA_003988905.1 | Manaaki Whenua Landcare<br>Research                            |
| 202 | <i>Fusarium ambrosium</i>              | Sordario | Asco    | 74 | 82 | 37 | 49 | 242 | GCA_003947045.1 | University of California,<br>Riverside                         |

|     |                                     |          |         |    |     |    |    |     |                 |                                                                              |
|-----|-------------------------------------|----------|---------|----|-----|----|----|-----|-----------------|------------------------------------------------------------------------------|
| 203 | <i>Penicillium janthinellum</i>     | Eurotio  | Asco    | 59 | 104 | 49 | 30 | 242 | GCA_002369805.1 | CSIR-NIIST                                                                   |
| 204 | <i>Neofusicoccum ribis</i>          | Dothideo | Asco    | 63 | 81  | 30 | 68 | 242 | GCA_009829435.1 | University of Pretoria                                                       |
| 205 | <i>Neofusicoccum umdonicola</i>     | Dothideo | Asco    | 63 | 82  | 30 | 67 | 242 | GCA_009829365.1 | University of Pretoria                                                       |
| 206 | <i>Lachnellula suecica</i>          | Leotio   | Asco    | 67 | 62  | 51 | 62 | 242 | GCA_007825345.1 | Canadian Food Inspection Agency (CFIA)                                       |
| 207 | <i>Fusarium tupiense</i>            | Sordario | Asco    | 56 | 85  | 51 | 49 | 241 | GCA_013364945.1 | US Department of Agriculture, Agriculture Research Service                   |
| 208 | <i>Arthrinium malaysianum</i>       | Sordario | Asco    | 75 | 54  | 54 | 58 | 241 | GCA_006508115.1 | Indian Institute Of Chemical biology                                         |
| 209 | <i>Juglanconis oblonga</i>          | Sordario | Asco    | 74 | 79  | 32 | 56 | 241 | GCA_003012965.1 | USDA-ARS                                                                     |
| 210 | <i>Colletotrichum orchidophilum</i> | Sordario | Asco    | 62 | 86  | 38 | 55 | 241 | GCA_001831195.1 | University of Western Brittany                                               |
| 211 | <i>Pseudogymnoascus sp. BL308</i>   | Leotio   | Asco    | 71 | 91  | 45 | 34 | 241 | GCA_001630595.1 | Ohio State University                                                        |
| 212 | <i>Auricularia cornea</i>           | Agarico  | Basidio | 65 | 42  | 53 | 80 | 240 | GCA_008368385.1 | Jilin Agricultural University                                                |
| 213 | <i>Fusarium oxysporum</i>           | Sordario | Asco    | 56 | 91  | 43 | 50 | 240 | GCA_009746015.1 | University of Massachusetts Amherst                                          |
| 214 | <i>Botryosphaeria dothidea</i>      | Dothideo | Asco    | 68 | 80  | 26 | 66 | 240 | GCA_011503125.2 | Shandong Agricultural University                                             |
| 215 | <i>Fusarium odoratissimum</i>       | Sordario | Asco    | 59 | 88  | 45 | 48 | 240 | GCA_000260195.2 | Broad Institute                                                              |
| 216 | <i>Colletotrichum tanacetii</i>     | Sordario | Asco    | 60 | 92  | 38 | 50 | 240 | GCA_005350895.1 | The University of Melbourne                                                  |
| 217 | <i>Fusarium sp. NRRL 53293</i>      | Sordario | Asco    | 55 | 83  | 54 | 47 | 239 | GCA_013759125.1 | US Department of Agriculture, Agriculture Research Service                   |
| 218 | <i>Juglanconis juglandina</i>       | Sordario | Asco    | 72 | 80  | 33 | 54 | 239 | GCA_003012975.1 | USDA-ARS                                                                     |
| 219 | <i>Fusarium begoniae</i>            | Sordario | Asco    | 57 | 82  | 53 | 47 | 239 | GCA_013186755.1 | US Department of Agriculture, Agriculture Research Service                   |
| 220 | <i>Neonectria sp. DH2</i>           | Sordario | Asco    | 72 | 90  | 38 | 39 | 239 | GCA_003934905.1 | Sun Yat-sen University                                                       |
| 221 | <i>Alternaria tenuissima</i>        | Dothideo | Asco    | 70 | 68  | 42 | 59 | 239 | GCA_004156035.1 | NIAB-East Malling Research                                                   |
| 222 | <i>Fusarium foetens</i>             | Sordario | Asco    | 64 | 82  | 43 | 49 | 238 | GCA_013623845.1 | US Department of Agriculture, Agriculture Research Service                   |
| 223 | <i>Fusarium euwallaceae</i>         | Sordario | Asco    | 72 | 83  | 37 | 46 | 238 | GCA_003957675.1 | University of California, Riverside                                          |
| 224 | <i>Colletotrichum lentis</i>        | Sordario | Asco    | 60 | 91  | 37 | 50 | 238 | GCA_003386485.1 | University of Saskatchewan                                                   |
| 225 | <i>Alternaria burnsii</i>           | Dothideo | Asco    | 67 | 69  | 43 | 59 | 238 | GCA_013036055.1 | Northwest A&F University                                                     |
| 226 | <i>Fusarium mexicanum</i>           | Sordario | Asco    | 55 | 84  | 51 | 47 | 237 | GCA_013396015.1 | US Department of Agriculture, Agriculture Research Service                   |
| 227 | <i>Fusarium commune</i>             | Sordario | Asco    | 59 | 86  | 45 | 46 | 236 | GCA_001599515.1 | RIKEN Center for Life Science Technologies, Division of Genomic Technologies |
| 228 | <i>Fusarium oxysporum</i>           | Sordario | Asco    | 62 | 81  | 41 | 52 | 236 | GCA_001757345.1 | ICRISAT                                                                      |
| 229 | <i>Colletotrichum sublineola</i>    | Sordario | Asco    | 64 | 66  | 48 | 58 | 236 | GCA_001951195.1 | University of Kentucky                                                       |
| 230 | <i>Fusarium udum</i>                | Sordario | Asco    | 56 | 86  | 44 | 50 | 236 | GCA_013186905.1 | US Department of Agriculture, Agriculture Research Service                   |
| 231 | <i>Alternaria arborescens</i>       | Dothideo | Asco    | 69 | 68  | 40 | 59 | 236 | GCA_004634205.1 | USFDA                                                                        |
| 232 | <i>Verticillium nonalfalfae</i>     | Sordario | Asco    | 69 | 89  | 38 | 40 | 236 | GCA_002776445.1 | University of Ljubljana, Biotechnical faculty                                |



|     |                                    |          |         |    |    |    |    |     |                 |                                                               |
|-----|------------------------------------|----------|---------|----|----|----|----|-----|-----------------|---------------------------------------------------------------|
| 233 | <i>Fusarium guttiforme</i>         | Sordario | Asco    | 57 | 81 | 49 | 48 | 235 | GCA_013186795.1 | US Department of Agriculture,<br>Agriculture Research Service |
| 234 | <i>Fusarium nygamai</i>            | Sordario | Asco    | 59 | 77 | 48 | 51 | 235 | GCA_001262555.1 | University of Pretoria                                        |
| 235 | <i>Lentithecium fluviatile</i>     | Dothideo | Asco    | 71 | 53 | 38 | 73 | 235 | GCA_010405425.1 | DOE Joint Genome Institute                                    |
| 236 | <i>Alternaria alternata</i>        | Dothideo | Asco    | 66 | 68 | 41 | 60 | 235 | GCA_011420255.1 | National Institute of Biological<br>Resources                 |
| 237 | <i>Alternaria sp. MG1</i>          | Dothideo | Asco    | 68 | 68 | 41 | 58 | 235 | GCA_003574525.1 | Northwestern Polytechnical<br>University                      |
| 238 | <i>Fusarium subglutinans</i>       | Sordario | Asco    | 58 | 77 | 49 | 50 | 234 | GCA_012071885.1 | UNRC                                                          |
| 239 | <i>Fusarium anthophilum</i>        | Sordario | Asco    | 57 | 80 | 49 | 48 | 234 | GCA_013364935.1 | US Department of Agriculture,<br>Agriculture Research Service |
| 240 | <i>Fusarium pininemorale</i>       | Sordario | Asco    | 56 | 81 | 51 | 46 | 234 | GCA_002165215.1 | Forestry and Agricultural<br>Biotechnology Institute          |
| 241 | <i>Fusarium mangiferae</i>         | Sordario | Asco    | 57 | 85 | 47 | 45 | 234 | GCA_900044065.1 | Institute of Bioinformatics and<br>Systems Biology            |
| 242 | <i>Clarireedia monteithiana</i>    | Leotio   | Asco    | 63 | 75 | 36 | 60 | 234 | GCA_002242835.1 | Rutgers University                                            |
| 243 | <i>Fusarium sp. AF-4</i>           | Sordario | Asco    | 73 | 80 | 36 | 45 | 234 | GCA_003946995.1 | University of California,<br>Riverside                        |
| 244 | <i>Verticillium alfalfae</i>       | Sordario | Asco    | 70 | 86 | 38 | 40 | 234 | GCA_002851655.1 | Wageningen University &<br>Research                           |
| 245 | <i>Rhynchostyrium rufulum</i>      | Dothideo | Asco    | 63 | 55 | 57 | 59 | 234 | GCA_000467735.1 | Assembling the Fungal Tree of<br>Life (AFTOL)                 |
| 246 | <i>Trametes villosa</i>            | Agarico  | Basidio | 66 | 38 | 35 | 94 | 233 | GCA_002964805.1 | Universidade Federal de Minas<br>Gerais                       |
| 247 | <i>Phoma sp. XZ068</i>             | Dothideo | Asco    | 59 | 88 | 31 | 55 | 233 | GCA_004835665.1 | Institute Of Microbiology                                     |
| 248 | <i>Talaromyces purpureogenus</i>   | Eurotio  | Asco    | 56 | 94 | 50 | 33 | 233 | GCA_001270325.1 | Chinese Academy of Sciences                                   |
| 249 | <i>Alternaria atra</i>             | Dothideo | Asco    | 67 | 66 | 44 | 56 | 233 | GCA_004634305.1 | Mathomics                                                     |
| 250 | <i>Cladosporium sp. SL-16</i>      | Dothideo | Asco    | 68 | 71 | 42 | 52 | 233 | GCA_002921095.1 | USFDA                                                         |
| 251 | <i>Cylindrocarpon cylindroides</i> | Sordario | Asco    | 68 | 93 | 34 | 37 | 232 | GCA_013756995.1 | Chinese academy of agricultural<br>sciences                   |
| 252 | <i>Fusarium floridanum</i>         | Sordario | Asco    | 72 | 76 | 38 | 46 | 232 | GCA_003947005.1 | US Department of Agriculture,<br>Agriculture Research Service |
| 253 | <i>Macrophomina phaseolina</i>     | Dothideo | Asco    | 60 | 80 | 26 | 66 | 232 | GCA_008729105.1 | University of California,<br>Riverside                        |
| 254 | <i>Karstenula rhodostoma</i>       | Dothideo | Asco    | 64 | 72 | 40 | 56 | 232 | GCA_010093485.1 | USDA                                                          |
| 255 | <i>Pseudogymnoascus pannorum</i>   | Leotio   | Asco    | 63 | 82 | 50 | 37 | 232 | GCA_001630605.1 | DOE Joint Genome Institute                                    |
| 256 | <i>Lophiostoma macrostomum</i>     | Dothideo | Asco    | 72 | 59 | 37 | 64 | 232 | GCA_010405375.1 | Ohio State University                                         |
| 257 | <i>Phaeosphaeria sp. A1 3.1a</i>   | Dothideo | Asco    | 73 | 51 | 51 | 57 | 232 | GCA_003501895.1 | DOE Joint Genome Institute                                    |
| 258 | <i>Auricularia subglabra</i>       | Agarico  | Basidio | 64 | 38 | 54 | 75 | 231 | GCA_000265015.1 | Centre for Crop & Disease<br>Management, Curtin University    |
| 259 | <i>Fusarium acuminatum</i>         | Sordario | Asco    | 66 | 76 | 41 | 48 | 231 | GCA_013363215.1 | JGI                                                           |
|     |                                    |          |         |    |    |    |    |     |                 | US Department of Agriculture,<br>Agriculture Research Service |

|     |                                         |          |         |    |    |    |    |     |                 |                                                                                                             |
|-----|-----------------------------------------|----------|---------|----|----|----|----|-----|-----------------|-------------------------------------------------------------------------------------------------------------|
| 260 | <i>Fusarium succisae</i>                | Sordario | Asco    | 56 | 81 | 49 | 45 | 231 | GCA_013186925.1 | US Department of Agriculture,<br>Agriculture Research Service                                               |
| 261 | <i>Phoma herbarum</i>                   | Dothideo | Asco    | 65 | 79 | 32 | 55 | 231 | GCA_001599375.1 | RIKEN Center for Life Science<br>Technologies, Division of<br>Genomic Technologies                          |
| 262 | <i>Alternaria consortialis</i>          | Dothideo | Asco    | 66 | 68 | 42 | 55 | 231 | GCA_001950455.1 | RIKEN Center for Life Science<br>Technologies, Division of<br>Genomic Technologies                          |
| 263 | <i>Xylaria sp. MSU_SB201401</i>         | Sordario | Asco    | 66 | 67 | 44 | 54 | 231 | GCA_002288965.1 | University of Arkansas                                                                                      |
| 264 | <i>Preussia sp. BSL10</i>               | Dothideo | Asco    | 66 | 74 | 40 | 51 | 231 | GCA_001553865.1 | Macrogen, Korea                                                                                             |
| 265 | <i>Fusarium fractiflexum</i>            | Sordario | Asco    | 61 | 76 | 43 | 50 | 230 | GCA_013758875.1 | US Department of Agriculture,<br>Agriculture Research Service                                               |
| 266 | <i>Fusarium azukicola</i>               | Sordario | Asco    | 66 | 80 | 34 | 50 | 230 | GCA_001680625.1 | Iowa State University                                                                                       |
| 267 | <i>Phaeosphaeria sp. H6.2b</i>          | Dothideo | Asco    | 72 | 51 | 51 | 56 | 230 | GCA_003503105.1 | Centre for Crop & Disease<br>Management, Curtin University                                                  |
| 268 | <i>Amylostereum areolatum</i>           | Agarico  | Basidio | 70 | 40 | 26 | 94 | 230 | GCA_012932865.1 | Beijing Forestry University                                                                                 |
| 269 | <i>Stachybotrys chlorohalonata</i>      | Sordario | Asco    | 79 | 58 | 42 | 51 | 230 | GCA_000732775.1 | UT Southwestern                                                                                             |
| 270 | <i>Fibularhizoctonia sp. CBS 109695</i> | Agarico  | Basidio | 70 | 40 | 31 | 88 | 229 | GCA_001630335.1 | DOE Joint Genome Institute                                                                                  |
| 271 | <i>Lindgomyces ingoldianus</i>          | Dothideo | Asco    | 74 | 42 | 44 | 69 | 229 | GCA_010093535.1 | DOE Joint Genome Institute                                                                                  |
| 272 | <i>Rachicladosporium antarcticum</i>    | Dothideo | Asco    | 68 | 32 | 72 | 56 | 228 | GCA_002077065.1 | University of California,<br>Riverside                                                                      |
| 273 | <i>Helotiales sp. F229</i>              | Leotio   | Asco    | 66 | 64 | 42 | 56 | 228 | GCA_002554605.1 | CEPLAS/University of Cologne                                                                                |
| 274 | <i>Fusarium tjaetaba</i>                | Sordario | Asco    | 56 | 79 | 46 | 47 | 228 | GCA_013396195.1 | US Department of Agriculture,<br>Agriculture Research Service                                               |
| 275 | <i>Fusarium kuroshium</i>               | Sordario | Asco    | 70 | 79 | 35 | 44 | 228 | GCA_003698175.1 | University of California,<br>Riverside                                                                      |
| 276 | <i>Didymella heteroderae</i>            | Dothideo | Asco    | 63 | 79 | 33 | 53 | 228 | GCA_011058895.1 | University of Campinas                                                                                      |
| 277 | <i>Ophiobolus disseminans</i>           | Dothideo | Asco    | 67 | 61 | 40 | 60 | 228 | GCA_010093685.1 | DOE Joint Genome Institute                                                                                  |
| 278 | <i>Fusarium ramigenum</i>               | Sordario | Asco    | 56 | 79 | 42 | 50 | 227 | GCA_013186855.1 | US Department of Agriculture,<br>Agriculture Research Service                                               |
| 279 | <i>Fusarium sp. Na10</i>                | Sordario | Asco    | 53 | 80 | 48 | 46 | 227 | GCA_002234255.1 | University of Amsterdam                                                                                     |
| 280 | <i>Fusarium globosum</i>                | Sordario | Asco    | 56 | 77 | 45 | 49 | 227 | GCA_013396165.1 | US Department of Agriculture,<br>Agriculture Research Service                                               |
| 281 | <i>Lasiodiplodia sp. COLG20</i>         | Dothideo | Asco    | 59 | 83 | 26 | 59 | 227 | GCA_009801085.1 | University of Agriculture,<br>Faisalabad Pakistan.                                                          |
| 282 | <i>Penicillium subrubescens</i>         | Eurotio  | Asco    | 56 | 86 | 51 | 33 | 226 | GCA_001908125.1 | CBS-KNAW Fungal Biodiversity<br>Centre Institute of the Royal<br>Netherlands Academy of Arts<br>and Science |
| 283 | <i>Fusarium proliferatum</i>            | Sordario | Asco    | 58 | 75 | 43 | 50 | 226 | GCA_003290285.1 | University of Pisa                                                                                          |
| 284 | <i>Bimuria novae-zelandiae</i>          | Dothideo | Asco    | 64 | 69 | 39 | 54 | 226 | GCA_010015655.1 | DOE Joint Genome Institute                                                                                  |
| 285 | <i>Fusarium fujikuroi</i>               | Sordario | Asco    | 56 | 78 | 43 | 49 | 226 | GCA_900096635.1 | Technische Universitat<br>Munchen - WZW                                                                     |
| 286 | <i>Colletotrichum graminicola</i>       | Sordario | Asco    | 62 | 60 | 47 | 57 | 226 | GCA_000149035.1 | Broad Institute                                                                                             |

|     |                                                  |          |         |    |     |    |    |     |                 |                                                                                                                                                                                                                                                                                                                   |
|-----|--------------------------------------------------|----------|---------|----|-----|----|----|-----|-----------------|-------------------------------------------------------------------------------------------------------------------------------------------------------------------------------------------------------------------------------------------------------------------------------------------------------------------|
| 287 | <i>Fusarium setosum</i>                          | Sordario | Asco    | 65 | 83  | 38 | 40 | 226 | GCA_013623625.1 | US Department of Agriculture,<br>Agriculture Research Service                                                                                                                                                                                                                                                     |
| 288 | <i>Didymella segeticola</i>                      | Dothideo | Asco    | 58 | 91  | 29 | 48 | 226 | GCA_004522025.1 | Guizhou University                                                                                                                                                                                                                                                                                                |
| 289 | <i>Fusarium phyllophilum</i>                     | Sordario | Asco    | 54 | 80  | 44 | 47 | 225 | GCA_013396025.1 | US Department of Agriculture,<br>Agriculture Research Service                                                                                                                                                                                                                                                     |
| 290 | <i>Fusarium xylarioides</i>                      | Sordario | Asco    | 54 | 83  | 42 | 46 | 225 | GCA_013183765.1 | University of Pretoria                                                                                                                                                                                                                                                                                            |
| 291 | <i>Aspergillus sergii</i>                        | Eurotio  | Asco    | 53 | 100 | 28 | 44 | 225 | GCA_009193525.1 | DOE Joint Genome Institute                                                                                                                                                                                                                                                                                        |
| 292 | <i>Lasiodiplodia theobromae</i>                  | Dothideo | Asco    | 58 | 80  | 28 | 59 | 225 | GCA_012971845.1 | Beltsville Agricultural Research<br>Center                                                                                                                                                                                                                                                                        |
| 293 | <i>Lasiodiplodia pseudotheobromae</i>            | Dothideo | Asco    | 58 | 82  | 27 | 58 | 225 | GCA_009829805.1 | University of Pretoria                                                                                                                                                                                                                                                                                            |
| 294 | <i>Ganoderma sp. BRIUMSc</i>                     | Agarico  | Basidio | 62 | 31  | 34 | 98 | 225 | GCA_008694245.1 | Universiti Malaysia Sabah                                                                                                                                                                                                                                                                                         |
| 295 | <i>Fusarium denticulatum</i>                     | Sordario | Asco    | 56 | 82  | 39 | 47 | 224 | GCA_013396175.1 | US Department of Agriculture,<br>Agriculture Research Service                                                                                                                                                                                                                                                     |
| 296 | <i>Monosporascus sp. MG133</i>                   | Sordario | Asco    | 69 | 60  | 39 | 56 | 224 | GCA_004155925.1 | University of New Mexico                                                                                                                                                                                                                                                                                          |
| 297 | <i>Fusarium sacchari</i>                         | Sordario | Asco    | 53 | 78  | 46 | 47 | 224 | GCA_013759005.1 | US Department of Agriculture,<br>Agriculture Research Service                                                                                                                                                                                                                                                     |
| 298 | <i>Fusarium temperatum</i>                       | Sordario | Asco    | 55 | 77  | 47 | 45 | 224 | GCA_001513835.1 | Forestry and Agricultural<br>Biotechnology Institute (FABI)                                                                                                                                                                                                                                                       |
| 299 | <i>Fusarium pseudoanthophilum</i>                | Sordario | Asco    | 57 | 76  | 44 | 47 | 224 | GCA_013395995.1 | US Department of Agriculture,<br>Agriculture Research Service                                                                                                                                                                                                                                                     |
| 300 | <i>Pseudocercospora fijiensis</i>                | Dothideo | Asco    | 58 | 81  | 26 | 59 | 224 | GCA_011057605.1 | Instituto de Investigacion<br>Lightbourn                                                                                                                                                                                                                                                                          |
| 301 | <i>Aspergillus ustus</i>                         | Eurotio  | Asco    | 62 | 78  | 42 | 42 | 224 | GCA_000812125.1 | Institute of developmentive<br>and regenerative biology                                                                                                                                                                                                                                                           |
| 302 | <i>Fusarium sp. AF-8</i>                         | Sordario | Asco    | 70 | 78  | 34 | 42 | 224 | GCA_003946985.1 | University of California,<br>Riverside                                                                                                                                                                                                                                                                            |
| 303 | <i>Monosporascus sp. mg162</i>                   | Sordario | Asco    | 65 | 66  | 40 | 53 | 224 | GCA_004155945.1 | University of New Mexico<br>Collaboration between Erik<br>Lysøe (Department of Plant<br>Health and Plant Protection,<br>Bioforsk - Norwegian Institute<br>of Agricultural and<br>Environmental Research) and<br>Linda Harris (Eastern Cereal &<br>Oilseed Research Centre,<br>Agriculture & Agri-Food<br>Canada). |
| 304 | <i>Fusarium avenaceum</i>                        | Sordario | Asco    | 62 | 74  | 40 | 47 | 223 | GCA_000769295.1 | US Department of Agriculture,<br>Agriculture Research Service                                                                                                                                                                                                                                                     |
| 305 | <i>Fusarium mundagurra</i>                       | Sordario | Asco    | 58 | 70  | 46 | 49 | 223 | GCA_013396205.1 | Moscow State University                                                                                                                                                                                                                                                                                           |
| 306 | <i>Pseudogymnoascus sp. VKM F-4517 (FW-2822)</i> | Leotio   | Asco    | 62 | 76  | 48 | 37 | 223 | GCA_000750875.1 | Tokyo Institute of Technology                                                                                                                                                                                                                                                                                     |
| 307 | <i>Aspergillus sojae</i>                         | Eurotio  | Asco    | 52 | 100 | 28 | 43 | 223 | GCA_009687765.1 | Moscow State University                                                                                                                                                                                                                                                                                           |
| 308 | <i>Pseudogymnoascus sp. VKM F-4246</i>           | Leotio   | Asco    | 66 | 79  | 43 | 35 | 223 | GCA_000750735.1 | University Malaya                                                                                                                                                                                                                                                                                                 |
| 309 | <i>Neoscytalidium dimidiatum</i>                 | Dothideo | Asco    | 61 | 78  | 24 | 59 | 222 | GCA_900092665.1 |                                                                                                                                                                                                                                                                                                                   |

|     |                                                 |          |      |    |    |    |    |     |                 |                                                               |
|-----|-------------------------------------------------|----------|------|----|----|----|----|-----|-----------------|---------------------------------------------------------------|
| 310 | <i>Fusarium pseudonygamai</i>                   | Sordario | Asco | 57 | 76 | 43 | 45 | 221 | GCA_013186785.1 | US Department of Agriculture,<br>Agriculture Research Service |
| 311 | <i>Botryosphaeria kuwatsukai</i>                | Dothideo | Asco | 63 | 72 | 26 | 60 | 221 | GCA_004016305.1 | Northwest A&F University                                      |
| 312 | <i>Rutstroemia sydowiana</i>                    | Leotio   | Asco | 62 | 69 | 24 | 66 | 221 | GCA_000812895.1 | USDA-ARS                                                      |
| 313 | <i>Pseudogymnoascus sp. VKM F-4514 (FW-929)</i> | Leotio   | Asco | 60 | 71 | 51 | 39 | 221 | GCA_000750795.1 | Moscow State University                                       |
| 314 | <i>Fusarium bulbicola</i>                       | Sordario | Asco | 54 | 76 | 45 | 45 | 220 | GCA_013758895.1 | US Department of Agriculture,<br>Agriculture Research Service |
| 315 | <i>Fusarium concolor</i>                        | Sordario | Asco | 54 | 71 | 47 | 48 | 220 | GCA_013184415.1 | US Department of Agriculture,<br>Agriculture Research Service |
| 316 | <i>Polyposphaeria fusca</i>                     | Dothideo | Asco | 65 | 48 | 44 | 63 | 220 | GCA_010093805.1 | DOE Joint Genome Institute                                    |
| 317 | <i>Rutstroemia sp. NJR-2017a BVV2</i>           | Leotio   | Asco | 56 | 73 | 39 | 52 | 220 | GCA_002946415.1 | Brigham Young University                                      |
| 318 | <i>Didymella pinodes</i>                        | Dothideo | Asco | 55 | 85 | 32 | 48 | 220 | GCA_004151525.1 | Curtin University                                             |
| 319 | <i>Pseudogymnoascus sp. VKM F-3808</i>          | Leotio   | Asco | 63 | 72 | 50 | 35 | 220 | GCA_000750675.1 | Moscow State University                                       |
| 320 | <i>Amniculicola lignicola</i>                   | Dothideo | Asco | 64 | 53 | 42 | 61 | 220 | GCA_010015725.1 | DOE Joint Genome Institute                                    |
| 321 | <i>Monosporascus sp. 5C6A</i>                   | Sordario | Asco | 68 | 56 | 37 | 58 | 219 | GCA_004155035.1 | University of New Mexico                                      |
| 322 | <i>Fusarium coicis</i>                          | Sordario | Asco | 54 | 74 | 45 | 46 | 219 | GCA_013781345.1 | US Department of Agriculture,<br>Agriculture Research Service |
| 323 | <i>Fusarium sp. NRRL 47473</i>                  | Sordario | Asco | 51 | 76 | 50 | 42 | 219 | GCA_013759115.1 | US Department of Agriculture,<br>Agriculture Research Service |
| 324 | <i>Colletotrichum falcatum</i>                  | Sordario | Asco | 59 | 57 | 46 | 57 | 219 | GCA_001484525.1 | ICAR-Sugarcane Breeding<br>Institute                          |
| 325 | <i>Pyrenochaeta sp. UM 256</i>                  | Dothideo | Asco | 62 | 64 | 40 | 53 | 219 | GCA_000359685.2 | UNIVERSITY OF MALAYA                                          |
| 326 | <i>Pseudogymnoascus sp. 05NY08</i>              | Leotio   | Asco | 60 | 85 | 44 | 30 | 219 | GCA_001662605.1 | US Forest Service                                             |
| 327 | <i>Verticillium dahliae</i>                     | Sordario | Asco | 62 | 80 | 39 | 38 | 219 | GCA_004798895.1 | Wageningen University and<br>Research                         |
| 328 | <i>Monosporascus sp. CRB-9-2</i>                | Sordario | Asco | 63 | 64 | 39 | 52 | 218 | GCA_004155915.1 | University of New Mexico                                      |
| 329 | <i>Fusarium hostae</i>                          | Sordario | Asco | 62 | 73 | 37 | 46 | 218 | GCA_002234235.1 | University of Amsterdam                                       |
| 330 | <i>Fusarium brevicatenuatum</i>                 | Sordario | Asco | 57 | 71 | 44 | 46 | 218 | GCA_013363135.1 | US Department of Agriculture,<br>Agriculture Research Service |
| 331 | <i>Didymella lethalis</i>                       | Dothideo | Asco | 54 | 88 | 30 | 46 | 218 | GCA_004335245.1 | Curtin University                                             |
| 332 | <i>Ascochyta lentis</i>                         | Dothideo | Asco | 56 | 84 | 26 | 52 | 218 | GCA_004011705.1 | Curtin University                                             |
| 333 | <i>Pseudogymnoascus sp. VKM F-4516 (FW-969)</i> | Leotio   | Asco | 61 | 70 | 48 | 39 | 218 | GCA_000750815.1 | Moscow State University                                       |
| 334 | <i>Ascochyta viciae</i>                         | Dothideo | Asco | 56 | 83 | 28 | 51 | 218 | GCA_004335155.1 | Curtin University                                             |
| 335 | <i>Ascochyta fabae</i>                          | Dothideo | Asco | 57 | 82 | 28 | 51 | 218 | GCA_004335285.1 | Curtin University                                             |
| 336 | <i>Aspergillus sp. ATCC 12892</i>               | Eurotio  | Asco | 51 | 95 | 29 | 42 | 217 | GCA_002894705.1 | Pacific Northwest National Lab                                |
| 337 | <i>Hyaloscypha bicolor</i>                      | Leotio   | Asco | 52 | 64 | 40 | 61 | 217 | GCA_002865645.1 | DOE Joint Genome Institute                                    |
| 338 | <i>Lasiodiplodia gonubiensis</i>                | Dothideo | Asco | 55 | 81 | 27 | 54 | 217 | GCA_009829795.1 | University of Pretoria                                        |
| 339 | <i>Fusarium dlamini</i>                         | Sordario | Asco | 54 | 72 | 46 | 45 | 217 | GCA_013186775.1 | US Department of Agriculture,<br>Agriculture Research Service |
| 340 | <i>Neonectria galligena</i>                     | Sordario | Asco | 59 | 90 | 34 | 34 | 217 | GCA_013759035.1 | US Department of Agriculture,<br>Agriculture Research Service |
| 341 | <i>Xylaria grammica</i>                         | Sordario | Asco | 66 | 56 | 43 | 52 | 217 | GCA_004353285.1 | National Institute of Biological<br>Resources                 |
| 342 | <i>Phoma sp. RAV-16-625</i>                     | Dothideo | Asco | 57 | 85 | 30 | 45 | 217 | GCA_004335185.1 | Curtin University                                             |

|     |                                                  |          |      |    |    |    |    |     |                 |                                                               |
|-----|--------------------------------------------------|----------|------|----|----|----|----|-----|-----------------|---------------------------------------------------------------|
| 343 | <i>Pseudogymnoascus sp. VKM F-3557</i>           | Leotio   | Asco | 60 | 67 | 50 | 40 | 217 | GCA_000750665.1 | Moscow State University                                       |
| 344 | <i>Aspergillus novoparasiticus</i>               | Eurotio  | Asco | 55 | 84 | 30 | 47 | 216 | GCA_009176405.1 | DOE Joint Genome Institute                                    |
| 345 | <i>Fusarium verticillioides</i>                  | Sordario | Asco | 54 | 71 | 45 | 46 | 216 | GCA_003317015.2 | CSIRO                                                         |
| 346 | <i>Setomelanomma holmii</i>                      | Dothideo | Asco | 58 | 66 | 36 | 56 | 216 | GCA_010015745.1 | DOE Joint Genome Institute                                    |
| 347 | <i>Ascochyta viciae-villosae</i>                 | Dothideo | Asco | 56 | 83 | 26 | 51 | 216 | GCA_004335205.1 | Curtin University                                             |
| 348 | <i>Hymenoscyphus repandus</i>                    | Leotio   | Asco | 66 | 60 | 34 | 56 | 216 | GCA_001414415.1 | University of Exeter                                          |
| 349 | <i>Fusarium sp. QHM</i>                          | Sordario | Asco | 54 | 69 | 46 | 46 | 215 | GCA_013416755.1 | Liaoning Technical University                                 |
| 350 | <i>Fusarium sp. BWC</i>                          | Sordario | Asco | 54 | 69 | 46 | 46 | 215 | GCA_013416785.1 | Liaoning Technical University                                 |
| 351 | <i>Aspergillus pseudocaelatus</i>                | Eurotio  | Asco | 57 | 87 | 31 | 40 | 215 | GCA_009193665.1 | DOE Joint Genome Institute                                    |
| 352 | <i>Aspergillus amoenus</i>                       | Eurotio  | Asco | 57 | 79 | 37 | 42 | 215 | GCA_009812435.1 | Universidad de Antioquia                                      |
| 353 | <i>Aspergillus versicolor</i>                    | Eurotio  | Asco | 54 | 85 | 40 | 36 | 215 | GCA_001890125.1 | DOE Joint Genome Institute                                    |
| 354 | <i>Pseudogymnoascus sp. VKM F-4515 (FW-2607)</i> | Leotio   | Asco | 60 | 75 | 45 | 35 | 215 | GCA_000750805.1 | Moscow State University                                       |
| 355 | <i>Didymella keratinophila</i>                   | Dothideo | Asco | 58 | 76 | 32 | 49 | 215 | GCA_011058865.1 | University of Campinas                                        |
| 356 | <i>fungal sp. EF0021</i>                         | 0        | 0    | 63 | 58 | 38 | 56 | 215 | GCA_000292665.1 | Fraunhofer                                                    |
| 357 | <i>Hymenoscyphus scutula</i>                     | Leotio   | Asco | 62 | 61 | 38 | 54 | 215 | GCA_001399465.1 | University of Exeter                                          |
| 358 | <i>Fusarium securum</i>                          | Sordario | Asco | 48 | 81 | 40 | 45 | 214 | GCA_013363185.1 | US Department of Agriculture,<br>Agriculture Research Service |
| 359 | <i>Fusarium brasiliense</i>                      | Sordario | Asco | 59 | 78 | 34 | 43 | 214 | GCA_001680685.1 | Iowa State University                                         |
| 360 | <i>Fusarium napiforme</i>                        | Sordario | Asco | 55 | 72 | 42 | 45 | 214 | GCA_013396005.1 | US Department of Agriculture,<br>Agriculture Research Service |
| 361 | <i>Monosporascus sp. CRB-8-3</i>                 | Sordario | Asco | 65 | 62 | 36 | 51 | 214 | GCA_004155055.1 | University of New Mexico                                      |
| 362 | <i>Stemphylium vesicarium</i>                    | Dothideo | Asco | 61 | 62 | 36 | 55 | 214 | GCA_004380135.1 | University of Bologna                                         |
| 363 | <i>Chaetomium cochliodes</i>                     | Sordario | Asco | 67 | 42 | 59 | 46 | 214 | GCA_001752565.1 | BOKU University                                               |
| 364 | <i>Xylaria flabelliformis</i>                    | Sordario | Asco | 61 | 60 | 40 | 53 | 214 | GCA_007182795.1 | Vanderbilt University                                         |
| 365 | <i>Alternaria solani</i>                         | Dothideo | Asco | 60 | 62 | 38 | 54 | 214 | GCA_002837235.1 | Institute Of Microbiology<br>Chinese Academy of Sciences      |
| 366 | <i>Madurella mycetomatis</i>                     | Sordario | Asco | 69 | 32 | 61 | 52 | 214 | GCA_001275765.2 | ErasmusMC                                                     |
| 367 | <i>Lomentospora prolificans</i>                  | Sordario | Asco | 74 | 39 | 52 | 49 | 214 | GCA_002276285.1 | Johns Hopkins University                                      |
| 368 | <i>Fusarium musae</i>                            | Sordario | Asco | 53 | 70 | 45 | 45 | 213 | GCA_013623345.1 | US Department of Agriculture,<br>Agriculture Research Service |
| 369 | <i>Aspergillus caelatus</i>                      | Eurotio  | Asco | 57 | 85 | 31 | 40 | 213 | GCA_009193585.1 | DOE Joint Genome Institute                                    |
| 370 | <i>Pseudogymnoascus sp. WSF 3629</i>             | Leotio   | Asco | 64 | 79 | 36 | 34 | 213 | GCA_001662585.1 | US Forest Service                                             |
| 371 | <i>Massarina eburnea</i>                         | Dothideo | Asco | 57 | 65 | 42 | 49 | 213 | GCA_010093635.1 | DOE Joint Genome Institute                                    |
| 372 | <i>Calonectria henricotiae</i>                   | Sordario | Asco | 54 | 76 | 38 | 44 | 212 | GCA_004380885.1 | USDA-ARS                                                      |
| 373 | <i>Fusarium algeriense</i>                       | Sordario | Asco | 54 | 67 | 41 | 50 | 212 | GCA_002982035.1 | US Department of Agriculture,<br>Agriculture Research Service |
| 374 | <i>Fusarium bactridioides</i>                    | Sordario | Asco | 53 | 71 | 44 | 44 | 212 | GCA_013623355.1 | US Department of Agriculture,<br>Agriculture Research Service |
| 375 | <i>Monosporascus ibericus</i>                    | Sordario | Asco | 62 | 60 | 38 | 52 | 212 | GCA_004154915.1 | University of New Mexico                                      |
| 376 | <i>Aspergillus sp. MA 6037</i>                   | Eurotio  | Asco | 54 | 83 | 35 | 40 | 212 | GCA_003138035.1 | University of Natural Resources<br>and Life Sciences, Vienna  |
| 377 | <i>Sclerotiophoma versabilis</i>                 | Dothideo | Asco | 54 | 80 | 30 | 48 | 212 | GCA_012274445.1 | Fujian Agriculture and Forestry<br>University                 |

|     |                                                 |          |         |    |    |    |     |     |                 |                                                                                    |
|-----|-------------------------------------------------|----------|---------|----|----|----|-----|-----|-----------------|------------------------------------------------------------------------------------|
| 378 | <i>Rutstroemia sp. NJR-2017a WRK4</i>           | Leotio   | Asco    | 56 | 66 | 36 | 54  | 212 | GCA_002946385.1 | Brigham Young University                                                           |
| 379 | <i>Glarea lozoyensis</i>                        | Leotio   | Asco    | 67 | 49 | 45 | 51  | 212 | GCA_000409485.1 | Institute Of Microbiology,<br>Chinese Academy of Sciences                          |
| 380 | <i>Fusarium beomiforme</i>                      | Sordario | Asco    | 54 | 64 | 41 | 52  | 211 | GCA_002980475.2 | US Department of Agriculture,<br>Agriculture Research Service                      |
| 381 | <i>Neonothopanus nambi</i>                      | Agarico  | Basidio | 58 | 18 | 33 | 102 | 211 | GCA_003987895.1 | Universidade de Sao Paulo                                                          |
| 382 | <i>Epicoccum sorghinum</i>                      | Dothideo | Asco    | 59 | 64 | 36 | 52  | 211 | GCA_001879705.1 | University of Sao Paulo                                                            |
| 383 | <i>Fusarium solani</i>                          | Sordario | Asco    | 58 | 80 | 31 | 42  | 211 | GCA_002215905.1 | National Institute of Biological<br>Resources                                      |
| 384 | <i>Hymenoscyphus infarciens</i>                 | Leotio   | Asco    | 60 | 65 | 36 | 50  | 211 | GCA_001414345.1 | University of Exeter                                                               |
| 385 | <i>Aspergillus sydowii</i>                      | Eurotio  | Asco    | 52 | 78 | 36 | 44  | 210 | GCA_009193685.1 | Hamburg University                                                                 |
| 386 | <i>Neonectria ditissima</i>                     | Sordario | Asco    | 58 | 84 | 34 | 34  | 210 | GCA_001305495.1 | The New Zealand Institute for<br>Plant & Food Research Ltd                         |
| 387 | <i>Xylaria longipes</i>                         | Sordario | Asco    | 65 | 52 | 38 | 55  | 210 | GCA_003426265.1 | IHI Zittau / TU Dresden                                                            |
| 388 | <i>Curvularia kusanoi</i>                       | Dothideo | Asco    | 58 | 64 | 36 | 52  | 210 | GCA_011058905.1 | University of Campinas                                                             |
| 389 | <i>Pseudogymnoascus sp. VKM F-4513 (FW-928)</i> | Leotio   | Asco    | 58 | 72 | 46 | 34  | 210 | GCA_000750755.1 | Moscow State University                                                            |
| 390 | <i>Sphaerobolus stellatus</i>                   | Agarico  | Basidio | 59 | 18 | 46 | 87  | 210 | GCA_000827215.1 | DOE Joint Genome Institute                                                         |
| 391 | <i>Zasmidium citrigriseum</i>                   | Dothideo | Asco    | 52 | 62 | 34 | 61  | 209 | GCA_002786025.1 | Northwest A&F University                                                           |
| 392 | <i>Aspergillus pseudotamarii</i>                | Eurotio  | Asco    | 55 | 88 | 28 | 38  | 209 | GCA_009193445.1 | DOE Joint Genome Institute                                                         |
| 393 | <i>Fusarium sp. NRRL 29148</i>                  | Sordario | Asco    | 54 | 68 | 41 | 46  | 209 | GCA_013759095.1 | US Department of Agriculture,<br>Agriculture Research Service                      |
| 394 | <i>Aspergillus transmontanensis</i>             | Eurotio  | Asco    | 52 | 86 | 28 | 43  | 209 | GCA_009193505.1 | DOE Joint Genome Institute                                                         |
| 395 | <i>Hypomontagnella monticulosa</i>              | Sordario | Asco    | 68 | 42 | 45 | 54  | 209 | GCA_902825475.1 | CEBITEC                                                                            |
| 396 | <i>Xylaria sp. BCC 1067</i>                     | Sordario | Asco    | 64 | 54 | 40 | 51  | 209 | GCA_005188305.1 | King Mongkut's University of<br>Technology Thonburi                                |
| 397 | <i>Rachicladosporium sp. CCFEE 5018</i>         | Dothideo | Asco    | 64 | 32 | 64 | 48  | 208 | GCA_002077045.2 | University of California,<br>Riverside                                             |
| 398 | <i>Fusarium burgessii</i>                       | Sordario | Asco    | 51 | 61 | 40 | 56  | 208 | GCA_002980515.1 | US Department of Agriculture,<br>Agriculture Research Service                      |
| 399 | <i>Talaromyces adpressus</i>                    | Eurotio  | Asco    | 51 | 72 | 49 | 36  | 208 | GCA_002775195.1 | University of Naples "Federico<br>II"                                              |
| 400 | <i>Fusarium tricinctum</i>                      | Sordario | Asco    | 54 | 68 | 41 | 45  | 208 | GCA_900382705.2 | INRA (Nouvelle-Aquitaine-<br>Bordeaux)                                             |
| 401 | <i>Aspergillus arachidicola</i>                 | Eurotio  | Asco    | 52 | 84 | 28 | 44  | 208 | GCA_009193545.1 | DOE Joint Genome Institute                                                         |
| 402 | <i>Aspergillus parasiticus</i>                  | Eurotio  | Asco    | 51 | 86 | 28 | 43  | 208 | GCA_013146005.1 | USDA                                                                               |
| 403 | <i>Fusarium sp. JS626</i>                       | Sordario | Asco    | 54 | 72 | 40 | 42  | 208 | GCA_000966865.1 | Seoul National University                                                          |
| 404 | <i>Fusarium circinatum</i>                      | Sordario | Asco    | 54 | 71 | 38 | 45  | 208 | GCA_000497325.3 | Pitch canker sequencing project                                                    |
| 405 | <i>Xylaria polymorpha</i>                       | Sordario | Asco    | 60 | 56 | 42 | 50  | 208 | GCA_003426235.1 | IHI Zittau / TU Dresden                                                            |
| 406 | <i>Fusarium sambucinum</i>                      | Sordario | Asco    | 54 | 76 | 36 | 42  | 208 | GCA_001567575.1 | Central Potato Research<br>Institute                                               |
| 407 | <i>Didymobotryum rigidum</i>                    | Sordario | Asco    | 64 | 49 | 38 | 57  | 208 | GCA_001600575.1 | RIKEN Center for Life Science<br>Technologies, Division of<br>Genomic Technologies |
| 408 | <i>Xylaria multiplex</i>                        | Sordario | Asco    | 63 | 54 | 42 | 49  | 208 | GCA_011057905.1 | TU Dresden - IHI Zittau                                                            |

|     |                                      |          |         |    |    |    |    |     |                 |                                                                                        |
|-----|--------------------------------------|----------|---------|----|----|----|----|-----|-----------------|----------------------------------------------------------------------------------------|
| 409 | <i>Aspergillus sp. Z5</i>            | Eurotio  | Asco    | 52 | 76 | 35 | 44 | 207 | GCA_001044295.1 | Zhejiang University                                                                    |
| 410 | <i>Fusarium citri</i>                | Sordario | Asco    | 54 | 73 | 42 | 38 | 207 | GCA_004367485.1 | US Department of Agriculture,<br>Agriculture Research Service                          |
| 411 | <i>Fusarium sp. AF-6</i>             | Sordario | Asco    | 62 | 72 | 31 | 42 | 207 | GCA_003947015.1 | University of California,<br>Riverside                                                 |
| 412 | <i>Rosellinia necatrix</i>           | Sordario | Asco    | 60 | 60 | 44 | 43 | 207 | GCA_001445595.3 | NARO Institute of Fruit Tree<br>Science                                                |
| 413 | <i>Chrysosporthe deuterocubensis</i> | Sordario | Asco    | 56 | 70 | 32 | 49 | 207 | GCA_001513825.1 | Forestry and Agricultural<br>Biotechnology Institute (FABI),<br>University of Pretoria |
| 414 | <i>Scedosporium apiospermum</i>      | Sordario | Asco    | 73 | 22 | 56 | 56 | 207 | GCA_000732125.1 | LUNAM - Angers University                                                              |
| 415 | <i>Arachnopeziza araneosa</i>        | Leotio   | Asco    | 66 | 40 | 49 | 51 | 206 | GCA_003988855.1 | Manaaki Whenua Landcare<br>Research                                                    |
| 416 | <i>Aspergillus steynii</i>           | Eurotio  | Asco    | 58 | 84 | 32 | 32 | 206 | GCA_002849105.1 | DOE Joint Genome Institute                                                             |
| 417 | <i>Psilocybe cf. subviscida</i>      | Agarico  | Basidio | 58 | 33 | 51 | 64 | 206 | GCA_013368295.1 | Lund University                                                                        |
| 418 | <i>Panaeolus cyanescens</i>          | Agarico  | Basidio | 56 | 34 | 50 | 66 | 206 | GCA_002938355.1 | Ohio State University                                                                  |
| 419 | <i>Monosporascus sp. GIB2</i>        | Sordario | Asco    | 60 | 56 | 40 | 49 | 205 | GCA_004155935.1 | University of New Mexico                                                               |
| 420 | <i>Aspergillus minisclerotigenes</i> | Eurotio  | Asco    | 48 | 90 | 28 | 39 | 205 | GCA_009176455.1 | DOE Joint Genome Institute                                                             |
| 421 | <i>Fusarium agapanthi</i>            | Sordario | Asco    | 51 | 72 | 39 | 43 | 205 | GCA_001654545.1 | US Department of Agriculture,<br>Agriculture Research Service                          |
| 422 | <i>Hymenoscyphus laetus</i>          | Leotio   | Asco    | 66 | 42 | 44 | 53 | 205 | GCA_001414375.1 | University of Exeter                                                                   |
| 423 | <i>Diplocarpon rosae</i>             | Leotio   | Asco    | 48 | 82 | 20 | 54 | 204 | GCA_002317995.1 | Leibniz Universitaet Hannover                                                          |
| 424 | <i>Aspergillus oryzae</i>            | Eurotio  | Asco    | 50 | 88 | 32 | 34 | 204 | GCA_002007945.1 | Bioprocess Technology<br>Laboratory, BIOTEC, Thailand                                  |
| 425 | <i>Parastagonospora nodorum</i>      | Dothideo | Asco    | 65 | 43 | 45 | 51 | 204 | GCA_002267045.1 | North Dakota State University                                                          |
| 426 | <i>Chrysosporthe austroafricana</i>  | Sordario | Asco    | 55 | 70 | 32 | 47 | 204 | GCA_001051155.1 | Forestry and Agricultural<br>Biotechnology Institute (FABI),<br>University of Pretoria |
| 427 | <i>Talaromyces verruculosus</i>      | Eurotio  | Asco    | 48 | 67 | 48 | 40 | 203 | GCA_001305275.1 | Penicillium verruculosum                                                               |
| 428 | <i>Aspergillus tamarii</i>           | Eurotio  | Asco    | 56 | 86 | 26 | 35 | 203 | GCA_009193485.1 | DOE Joint Genome Institute                                                             |
| 429 | <i>Fusarium sp. NRRL 52700</i>       | Sordario | Asco    | 50 | 65 | 44 | 44 | 203 | GCA_013396095.1 | US Department of Agriculture,<br>Agriculture Research Service                          |
| 430 | <i>Fusarium thapsinum</i>            | Sordario | Asco    | 51 | 67 | 40 | 45 | 203 | GCA_013186935.1 | US Department of Agriculture,<br>Agriculture Research Service                          |
| 431 | <i>Bipolaris maydis</i>              | Dothideo | Asco    | 65 | 48 | 35 | 55 | 203 | GCA_000338975.1 | JGI                                                                                    |
| 432 | <i>Coniothyrium glycines</i>         | Dothideo | Asco    | 56 | 64 | 36 | 47 | 203 | GCA_004523985.2 | Oklahoma State University                                                              |
| 433 | <i>Sarocladium strictum</i>          | Sordario | Asco    | 67 | 42 | 54 | 40 | 203 | GCA_900290465.1 | CEBITEC                                                                                |
| 434 | <i>Helminthosporium solani</i>       | Dothideo | Asco    | 58 | 58 | 39 | 48 | 203 | GCA_000498615.1 | University of Wisconsin-<br>Madison                                                    |
| 435 | <i>Proliferodiscus dingleyae</i>     | Leotio   | Asco    | 53 | 58 | 46 | 46 | 203 | GCA_003988795.1 | Manaaki Whenua Landcare<br>Research                                                    |
| 436 | <i>Pseudogymnoascus sp. BL549</i>    | Leotio   | Asco    | 58 | 75 | 41 | 29 | 203 | GCA_001630585.1 | Ohio State University                                                                  |
| 437 | <i>Scytalidium sp. 3C</i>            | Leotio   | Asco    | 46 | 62 | 46 | 48 | 202 | GCA_000743665.3 | Saint-Petersburg State<br>University                                                   |

|     |                                      |          |         |    |    |    |    |     |                 |                                                                              |
|-----|--------------------------------------|----------|---------|----|----|----|----|-----|-----------------|------------------------------------------------------------------------------|
| 438 | <i>Talaromyces cellulolyticus</i>    | Eurotio  | Asco    | 48 | 67 | 45 | 42 | 202 | GCA_009805475.1 | JNU                                                                          |
| 439 | <i>Pseudohalonestria lignicola</i>   | Sordario | Asco    | 60 | 47 | 46 | 49 | 202 | GCA_003049395.1 | Agricultural Research Service,<br>United States Department of<br>Agriculture |
| 440 | <i>Penicillium sp. MT2 MMC-2018</i>  | Eurotio  | Asco    | 51 | 77 | 46 | 28 | 202 | GCA_003852855.1 | Florida A&M University                                                       |
| 441 | <i>Fusarium scirpi</i>               | Sordario | Asco    | 51 | 71 | 40 | 40 | 202 | GCA_004367495.1 | US Department of Agriculture,<br>Agriculture Research Service                |
| 442 | <i>Plenodomus tracheiphilus</i>      | Dothideo | Asco    | 56 | 64 | 31 | 51 | 202 | GCA_010093695.1 | DOE Joint Genome Institute                                                   |
| 443 | <i>Rutstroemia sp. NJR-2017a BBW</i> | Leotio   | Asco    | 53 | 65 | 33 | 51 | 202 | GCA_002946425.1 | Brigham Young University                                                     |
| 444 | <i>Ascochyta koolunga</i>            | Dothideo | Asco    | 52 | 79 | 27 | 44 | 202 | GCA_004151165.1 | Curtin University                                                            |
| 445 | <i>Coniochaeta ligniaria</i>         | Sordario | Asco    | 61 | 46 | 50 | 44 | 201 | GCA_001879275.1 | DOE Joint Genome Institute                                                   |
| 446 | <i>Fusarium venenatum</i>            | Sordario | Asco    | 54 | 71 | 36 | 40 | 201 | GCA_900007375.1 | ROTHAMSTED RESEARCH                                                          |
| 447 | <i>Aspergillus hancockii</i>         | Eurotio  | Asco    | 54 | 78 | 29 | 40 | 201 | GCA_001696595.1 | CSIRO                                                                        |
| 448 | <i>Ganoderma multipileum</i>         | Agarico  | Basidio | 54 | 40 | 33 | 74 | 201 | GCA_000338015.1 | Ganoderma lucidum Research<br>Consortium                                     |
| 449 | <i>Cladosporium cladosporioides</i>  | Dothideo | Asco    | 55 | 57 | 40 | 49 | 201 | GCA_002901145.1 | Yeungnam University                                                          |
| 450 | <i>Hymenoscyphus fraxineus</i>       | Leotio   | Asco    | 59 | 54 | 32 | 56 | 201 | GCA_001414365.1 | University of Exeter                                                         |
| 451 | <i>Chaetomium globosum</i>           | Sordario | Asco    | 62 | 43 | 54 | 42 | 201 | GCA_000143365.1 | The Genome Sequencing<br>Platform, The Genome<br>Assembly Team               |
| 452 | <i>Penicillium sp. 'occitanis'</i>   | Eurotio  | Asco    | 48 | 67 | 45 | 40 | 200 | GCA_002382835.1 | Center for Genomic Regulation<br>(CRG)                                       |
| 453 | <i>Talaromyces pinophilus</i>        | Eurotio  | Asco    | 50 | 66 | 46 | 38 | 200 | GCA_011392495.1 | Embrapa Agroenergia                                                          |
| 454 | <i>Fusarium tanahbumbuense</i>       | Sordario | Asco    | 52 | 65 | 43 | 40 | 200 | GCA_012977735.1 | US Department of Agriculture,<br>Agriculture Research Service                |
| 455 | <i>Macroventuria anomochaeta</i>     | Dothideo | Asco    | 48 | 82 | 27 | 43 | 200 | GCA_010093625.1 | DOE Joint Genome Institute                                                   |
| 456 | <i>Aspergillus westerdijkiae</i>     | Eurotio  | Asco    | 52 | 84 | 30 | 34 | 200 | GCA_001307345.1 | Nanyang Technological<br>University                                          |
| 457 | <i>Fusarium nisikadoi</i>            | Sordario | Asco    | 50 | 63 | 41 | 45 | 199 | GCA_013623555.1 | US Department of Agriculture,<br>Agriculture Research Service                |
| 458 | <i>Fusarium austroafricanum</i>      | Sordario | Asco    | 52 | 61 | 45 | 41 | 199 | GCA_012932025.1 | US Department of Agriculture,<br>Agriculture Research Service                |
| 459 | <i>Fusarium humuli</i>               | Sordario | Asco    | 50 | 66 | 43 | 40 | 199 | GCA_004366955.1 | US Department of Agriculture,<br>Agriculture Research Service                |
| 460 | <i>Fusarium albidum</i>              | Sordario | Asco    | 53 | 77 | 32 | 37 | 199 | GCA_013618265.1 | US Department of Agriculture,<br>Agriculture Research Service                |
| 461 | <i>Neonectria punicea</i>            | Sordario | Asco    | 54 | 78 | 32 | 35 | 199 | GCA_003385315.1 | USDA-ARS                                                                     |
| 462 | <i>fungal sp. No.14919</i>           | 0        | 0       | 59 | 50 | 40 | 50 | 199 | GCA_002003505.1 | Tsukuba Biotechnology<br>Research Center, Astellas<br>Pharma Inc.            |
| 463 | <i>Curvularia geniculata</i>         | Dothideo | Asco    | 62 | 52 | 36 | 49 | 199 | GCA_002982235.1 | Universidade Federal de Mato<br>Grosso                                       |
| 464 | <i>Curvularia lunata</i>             | Dothideo | Asco    | 62 | 52 | 36 | 49 | 199 | GCA_005212705.1 | Universidade Federal de Mato<br>Grosso                                       |



|     |                                             |          |         |    |    |    |    |     |                 |                                                                                                                                                  |
|-----|---------------------------------------------|----------|---------|----|----|----|----|-----|-----------------|--------------------------------------------------------------------------------------------------------------------------------------------------|
| 465 | <i>Hymenoscyphus occultus</i>               | Leotio   | Asco    | 58 | 56 | 32 | 53 | 199 | GCA_900536445.1 | UNIVERSITY OF COPENHAGEN,<br>DEPARTMENT OF GEOSCIENCES<br>AND NATURAL RESOURCE<br>MANAGEMENT                                                     |
| 466 | <i>Hymenoscyphus koreanus</i>               | Leotio   | Asco    | 58 | 56 | 32 | 53 | 199 | GCA_902652825.1 | UNIVERSITY OF COPENHAGEN,<br>DEPARTMENT OF GEOSCIENCES<br>AND NATURAL RESOURCE<br>MANAGEMENT                                                     |
| 467 | <i>Fusarium flagelliforme</i>               | Sordario | Asco    | 52 | 68 | 38 | 40 | 198 | GCA_004367175.1 | US Department of Agriculture,<br>Agriculture Research Service<br>Jet Propulsion Laboratory,<br>California Institute of<br>Technology<br>USDA-ARS |
| 468 | <i>Aspergillus aff. floccosus IMV 01167</i> | Eurotio  | Asco    | 51 | 70 | 39 | 38 | 198 | GCA_001931935.1 | US Department of Agriculture,<br>Agriculture Research Service<br>Royal Botanic Gardens, Kew<br>USDA-ARS                                          |
| 469 | <i>Chrysosporthe cubensis</i>               | Sordario | Asco    | 54 | 64 | 30 | 50 | 198 | GCA_004802525.1 | US Department of Agriculture,<br>Agriculture Research Service<br>Royal Botanic Gardens, Kew<br>USDA-ARS                                          |
| 470 | <i>Neonectria coccinea</i>                  | Sordario | Asco    | 53 | 78 | 32 | 35 | 198 | GCA_013757005.1 | US Department of Agriculture,<br>Agriculture Research Service<br>Royal Botanic Gardens, Kew<br>USDA-ARS                                          |
| 471 | <i>Baeospora myosura</i>                    | Agarico  | Basidio | 58 | 38 | 23 | 79 | 198 | GCA_001179705.1 | Biotechnology and Nuclear<br>Technology Research Institute                                                                                       |
| 472 | <i>Limonomyces culmigenus</i>               | Agarico  | Basidio | 58 | 42 | 45 | 52 | 197 | GCA_002233555.1 | US Department of Agriculture,<br>Agriculture Research Service<br>The Energy and Resources<br>Institute                                           |
| 473 | <i>Ganoderma tsugae</i>                     | Agarico  | Basidio | 52 | 30 | 35 | 80 | 197 | GCA_003057275.1 | Centro de Investigaciones en<br>Fitopatologias (CIDEFI)                                                                                          |
| 474 | <i>Fusarium babinda</i>                     | Sordario | Asco    | 52 | 63 | 38 | 44 | 197 | GCA_012977765.1 | DOE Joint Genome Institute<br>Beltsville Agricultural Research<br>Center                                                                         |
| 475 | <i>Aspergillus flavus</i>                   | Eurotio  | Asco    | 47 | 86 | 31 | 33 | 197 | GCA_004150275.1 | UES / AFRL                                                                                                                                       |
| 476 | <i>Stemphylium lycopersici</i>              | Dothideo | Asco    | 52 | 61 | 36 | 48 | 197 | GCA_003268315.1 | US Department of Agriculture,<br>Agriculture Research Service<br>Gansu Academy of Agricultural<br>Sciences                                       |
| 477 | <i>Pleomassaria siparia</i>                 | Dothideo | Asco    | 56 | 60 | 34 | 47 | 197 | GCA_010093715.1 | The Institute of Medicinal Plant<br>Development, China                                                                                           |
| 478 | <i>Ceratobasidium theobromae</i>            | Agarico  | Basidio | 54 | 72 | 18 | 53 | 197 | GCA_009078325.1 | Iowa State University<br>IHI Zittau / TU Dresden                                                                                                 |
| 479 | <i>Phialemoniopsis curvata</i>              | Sordario | Asco    | 64 | 48 | 36 | 48 | 196 | GCA_004353045.1 | US Department of Agriculture,<br>Agriculture Research Service                                                                                    |
| 480 | <i>Fusarium sp. NRRL 53497</i>              | Sordario | Asco    | 51 | 64 | 37 | 44 | 196 | GCA_013184445.1 | US Department of Agriculture,<br>Agriculture Research Service                                                                                    |
| 481 | <i>Fusarium equiseti</i>                    | Sordario | Asco    | 50 | 65 | 41 | 40 | 196 | GCA_003313175.1 | US Department of Agriculture,<br>Agriculture Research Service                                                                                    |
| 482 | <i>Ganoderma sinense</i>                    | Agarico  | Basidio | 52 | 34 | 34 | 76 | 196 | GCA_002760635.1 | UNIVERSITY OF MALAYA                                                                                                                             |
| 483 | <i>Fusarium cuneirostrum</i>                | Sordario | Asco    | 54 | 70 | 37 | 35 | 196 | GCA_001680505.1 |                                                                                                                                                  |
| 484 | <i>Kretzschmaria deusta</i>                 | Sordario | Asco    | 56 | 56 | 38 | 46 | 196 | GCA_002081935.3 |                                                                                                                                                  |
| 485 | <i>Fusarium incarnatum</i>                  | Sordario | Asco    | 53 | 65 | 40 | 38 | 196 | GCA_004367075.1 |                                                                                                                                                  |
| 486 | <i>Fusarium caatingaense</i>                | Sordario | Asco    | 52 | 66 | 40 | 38 | 196 | GCA_013624355.1 |                                                                                                                                                  |
| 487 | <i>Curvularia papendorffii</i>              | Dothideo | Asco    | 61 | 51 | 35 | 49 | 196 | GCA_000817285.1 |                                                                                                                                                  |

|     |                                        |                 |           |    |    |    |    |     |                 |                                                                                              |
|-----|----------------------------------------|-----------------|-----------|----|----|----|----|-----|-----------------|----------------------------------------------------------------------------------------------|
| 488 | <i>Hymenoscyphus linearis</i>          | Leotio          | Asco      | 56 | 60 | 31 | 49 | 196 | GCA_900536425.1 | UNIVERSITY OF COPENHAGEN,<br>DEPARTMENT OF GEOSCIENCES<br>AND NATURAL RESOURCE<br>MANAGEMENT |
| 489 | <i>Bipolaris oryzae</i>                | Dothideo        | Asco      | 60 | 52 | 34 | 50 | 196 | GCA_000523455.1 | JGI                                                                                          |
| 490 | <i>Cryphonectria radicalis</i>         | Sordario        | Asco      | 50 | 71 | 34 | 41 | 196 | GCA_003054855.1 | USDA-ARS                                                                                     |
| 491 | <i>Tinctoporellus epimiltinus</i>      | Agarico         | Basidio   | 55 | 36 | 34 | 71 | 196 | GCA_900155495.1 | BIOTECHNOLOGY RESEARCH<br>INSTITUTE                                                          |
| 492 | <i>Cucurbitaria berberidis</i>         | Dothideo        | Asco      | 57 | 61 | 36 | 42 | 196 | GCA_010015615.1 | DOE Joint Genome Institute                                                                   |
| 493 | <i>Talaromyces amestolkiae</i>         | Eurotio         | Asco      | 44 | 73 | 43 | 35 | 195 | GCA_001896365.1 | Centro de Investigaciones<br>Biologicas                                                      |
| 494 | <i>Fusarium gaditjirri</i>             | Sordario        | Asco      | 51 | 60 | 40 | 44 | 195 | GCA_013266175.1 | US Department of Agriculture,<br>Agriculture Research Service                                |
| 495 | <i>Fusarium tucumaniae</i>             | Sordario        | Asco      | 55 | 68 | 36 | 36 | 195 | GCA_001680535.1 | Iowa State University                                                                        |
| 496 | <i>Neonectria hederiae</i>             | Sordario        | Asco      | 54 | 77 | 30 | 34 | 195 | GCA_003385265.1 | USDA-ARS                                                                                     |
| 497 | <i>Cladosporium phlei</i>              | Dothideo        | Asco      | 60 | 54 | 35 | 46 | 195 | GCA_003614995.1 | National Institute of<br>Agricultural Science                                                |
| 498 | <i>Scedosporium boydii</i>             | Sordario        | Asco      | 66 | 25 | 49 | 55 | 195 | GCA_002221725.1 | GEIHP, UPRES EA 3142                                                                         |
| 499 | <i>Epicoccum nigrum</i>                | Dothideo        | Asco      | 53 | 61 | 33 | 47 | 194 | GCA_002116315.1 | The University of Auckland                                                                   |
| 500 | <i>Bipolaris victoriae</i>             | Dothideo        | Asco      | 60 | 49 | 36 | 49 | 194 | GCA_000527765.1 | JGI                                                                                          |
| 501 | <i>Shiraia sp. slf14</i>               | Dothideo        | Asco      | 59 | 49 | 40 | 46 | 194 | GCA_000498155.1 | Jiangxi Normal University                                                                    |
| 502 | <i>Amphirosellinia nigrospora</i>      | Sordario        | Asco      | 56 | 55 | 36 | 47 | 194 | GCA_004123355.1 | National Institute of Biological<br>Resources                                                |
| 503 | <i>Bipolaris zeicola</i>               | Dothideo        | Asco      | 60 | 50 | 36 | 48 | 194 | GCA_000523435.1 | JGI                                                                                          |
| 504 | <i>Glonium stellatum</i>               | Dothideo        | Asco      | 55 | 43 | 35 | 61 | 194 | GCA_001692915.1 | 1000 Fungal Genome Project                                                                   |
| 505 | <i>Pseudogymnoascus sp. 03VT05</i>     | Leotio          | Asco      | 53 | 72 | 40 | 28 | 193 | GCA_001662645.1 | US Forest Service                                                                            |
| 506 | <i>Hypoxyton pulvicidum</i>            | Sordario        | Asco      | 61 | 42 | 40 | 50 | 193 | GCA_902806525.1 | CEBITEC                                                                                      |
| 507 | <i>Parastagonospora avenae</i>         | Dothideo        | Asco      | 62 | 41 | 43 | 47 | 193 | GCA_003503115.1 | Centre for Crop & Disease<br>Management, Curtin University                                   |
| 508 | <i>Tulasnella calospora</i>            | Agarico         | Basidio   | 68 | 46 | 44 | 35 | 193 | GCA_000827465.1 | DOE Joint Genome Institute                                                                   |
| 509 | <i>Auricularia auricula-judae</i>      | Agarico         | Basidio   | 52 | 35 | 44 | 61 | 192 | GCA_002092955.1 | Jilin Agricultural University                                                                |
| 510 | <i>Fusarium torulosum</i>              | Sordario        | Asco      | 49 | 62 | 40 | 41 | 192 | GCA_013623875.1 | US Department of Agriculture,<br>Agriculture Research Service                                |
| 511 | <i>Magnaporthe sp. MG03</i>            | Sordario        | Asco      | 64 | 37 | 40 | 51 | 192 | GCA_001936055.1 | Centre for Cellular and<br>Molecular Platforms                                               |
| 512 | <i>Pseudogymnoascus sp. 23342-1-11</i> | Leotio          | Asco      | 60 | 66 | 34 | 32 | 192 | GCA_001662575.1 | US Forest Service                                                                            |
| 513 | <i>Fusarium coffeatum</i>              | Sordario        | Asco      | 49 | 63 | 43 | 37 | 192 | GCA_003316985.1 | CSIRO                                                                                        |
| 514 | <i>Cryphonectria macrospora</i>        | Sordario        | Asco      | 48 | 70 | 33 | 41 | 192 | GCA_004802535.1 | USDA-ARS                                                                                     |
| 515 | <i>Cryphonectria nitschkei</i>         | Sordario        | Asco      | 48 | 70 | 33 | 41 | 192 | GCA_006503525.1 | USDA                                                                                         |
| 516 | <i>Hypomontagnella submonticulosa</i>  | Sordario        | Asco      | 63 | 41 | 40 | 48 | 192 | GCA_902806495.1 | CEBITEC                                                                                      |
| 517 | <i>Clarireedia sp. CPB17</i>           | Leotio          | Asco      | 54 | 57 | 32 | 49 | 192 | GCA_002242865.1 | Rutgers University                                                                           |
| 518 | <i>Piromyces finnis</i>                | Neocallimastigo | Chytridio | 91 | 30 | 71 | 0  | 192 | GCA_002104945.1 | DOE Joint Genome Institute                                                                   |
| 519 | <i>Auricularia heimuer</i>             | Agarico         | Basidio   | 53 | 37 | 41 | 60 | 191 | GCA_002287115.1 | Beijing Forestry University                                                                  |
| 520 | <i>Zasmidium cellare</i>               | Dothideo        | Asco      | 49 | 50 | 31 | 61 | 191 | GCA_010093935.1 | DOE Joint Genome Institute                                                                   |

|     |                                      |          |      |    |    |    |    |     |                 |                                                                                               |
|-----|--------------------------------------|----------|------|----|----|----|----|-----|-----------------|-----------------------------------------------------------------------------------------------|
| 521 | <i>Falciphora oryzae</i>             | Sordario | Asco | 67 | 36 | 36 | 52 | 191 | GCA_000733355.1 | Institute of Biotechnology                                                                    |
| 522 | <i>Ascochyta rabiei</i>              | Dothideo | Asco | 47 | 78 | 26 | 40 | 191 | GCA_004011695.1 | Curtin University                                                                             |
| 523 | <i>Diplodia seriata</i>              | Dothideo | Asco | 52 | 66 | 24 | 49 | 191 | GCA_001975905.1 | INRA                                                                                          |
| 524 | <i>Fusarium irregulare</i>           | Sordario | Asco | 50 | 63 | 40 | 38 | 191 | GCA_004367085.1 | US Department of Agriculture,<br>Agriculture Research Service                                 |
| 525 | <i>Bipolaris sorokiniana</i>         | Dothideo | Asco | 59 | 51 | 36 | 45 | 191 | GCA_004329375.1 | ICAR-Indian Agricultural<br>Research Institute                                                |
| 526 | <i>Cryphonectria parasitica</i>      | Sordario | Asco | 47 | 68 | 34 | 42 | 191 | GCA_011745365.1 | DOE Joint Genome Institute                                                                    |
| 527 | <i>Xylaria sp. JS573</i>             | Sordario | Asco | 57 | 50 | 34 | 50 | 191 | GCA_000966885.1 | Seoul National University                                                                     |
| 528 | <i>Xylaria hypoxylon</i>             | Sordario | Asco | 58 | 47 | 39 | 47 | 191 | GCA_902806585.1 | CEBITEC                                                                                       |
| 529 | <i>Golovinomyces magnicellulatus</i> | Leotio   | Asco | 38 | 70 | 38 | 44 | 190 | GCA_006912115.1 | The Ohio State University                                                                     |
| 530 | <i>Morchella eximia</i>              | Pezizo   | Asco | 51 | 80 | 26 | 33 | 190 | GCA_003314645.1 | Kunming University of Science<br>and Technology                                               |
| 531 | <i>Paraphaeosphaeria minitans</i>    | Dothideo | Asco | 57 | 50 | 35 | 48 | 190 | GCA_009707825.1 | State Key Laboratory of<br>Agriculture Microbiology                                           |
| 532 | <i>Aspergillus bombycis</i>          | Eurotio  | Asco | 52 | 74 | 26 | 38 | 190 | GCA_001792695.1 | USDA-ARS-SRRC                                                                                 |
| 533 | <i>Aspergillus nomiae</i>            | Eurotio  | Asco | 52 | 72 | 28 | 38 | 190 | GCA_001204775.2 | USDA-ARS-SRRC                                                                                 |
| 534 | <i>Fusarium sporotrichioides</i>     | Sordario | Asco | 49 | 65 | 37 | 39 | 190 | GCA_003012315.1 | Robert Proctor's shared<br>submissions                                                        |
| 535 | <i>Fusarium armeniacum</i>           | Sordario | Asco | 50 | 60 | 39 | 41 | 190 | GCA_013618295.1 | US Department of Agriculture,<br>Agriculture Research Service                                 |
| 536 | <i>Fusarium camptoceras</i>          | Sordario | Asco | 50 | 65 | 38 | 37 | 190 | GCA_004367475.1 | US Department of Agriculture,<br>Agriculture Research Service                                 |
| 537 | <i>Fusarium cerealis</i>             | Sordario | Asco | 50 | 57 | 40 | 43 | 190 | GCA_012600195.1 | University of Minnesota                                                                       |
| 538 | <i>Ophioceras dolichostomum</i>      | Sordario | Asco | 61 | 36 | 42 | 51 | 190 | GCA_003049485.1 | Agricultural Research Service,<br>United States Department of<br>Agriculture                  |
| 539 | <i>Aspergillus ochraceus</i>         | Eurotio  | Asco | 50 | 81 | 27 | 32 | 190 | GCA_005784425.1 | Shanghai Institute of<br>Technology                                                           |
| 540 | <i>Hypoxylon sp. E7406B</i>          | Sordario | Asco | 60 | 41 | 39 | 50 | 190 | GCA_000931505.1 | Yale University                                                                               |
| 541 | <i>Fusarium clavum</i>               | Sordario | Asco | 50 | 66 | 36 | 37 | 189 | GCA_004367155.1 | US Department of Agriculture,<br>Agriculture Research Service                                 |
| 542 | <i>Phialocephala sp. D728</i>        | Leotio   | Asco | 48 | 43 | 40 | 58 | 189 | GCA_003988865.1 | Manaaki Whenua Landcare<br>Research                                                           |
| 543 | <i>Annulohypoxylon stygium</i>       | Sordario | Asco | 58 | 43 | 38 | 50 | 189 | GCA_003314315.1 | Kunming University of Science<br>and Technology                                               |
| 544 | <i>Hypoxylon sp. CO27-5</i>          | Sordario | Asco | 59 | 40 | 41 | 49 | 189 | GCA_002120305.1 | DOE Joint Genome Institute<br>Laboratory for Conservation<br>and Utilization of Bio-Resources |
| 545 | <i>Dactylellina cionopaga</i>        | Orbilio  | Asco | 49 | 73 | 35 | 32 | 189 | GCA_012184355.1 | and Key Laboratory for<br>Microbial Diversity in<br>Southwest China, Ministry of<br>Education |
| 546 | <i>Calonectria pseudonaviculata</i>  | Sordario | Asco | 49 | 69 | 34 | 36 | 188 | GCA_001696505.1 | USDA-ARS                                                                                      |

|     |                                     |          |         |    |    |    |    |     |                 |                                                               |
|-----|-------------------------------------|----------|---------|----|----|----|----|-----|-----------------|---------------------------------------------------------------|
| 547 | <i>Magnaporthe sp. MG07</i>         | Sordario | Asco    | 61 | 37 | 42 | 48 | 188 | GCA_001936455.1 | Centre for Cellular and Molecular Platforms                   |
| 548 | <i>Fusarium sp. NRRL 6227</i>       | Sordario | Asco    | 49 | 60 | 39 | 40 | 188 | GCA_013623825.1 | US Department of Agriculture, Agriculture Research Service    |
| 549 | <i>Fusarium luffae</i>              | Sordario | Asco    | 48 | 64 | 38 | 38 | 188 | GCA_013184325.1 | US Department of Agriculture, Agriculture Research Service    |
| 550 | <i>Claviceps homoeocarpa</i>        | Leotio   | Asco    | 48 | 67 | 30 | 43 | 188 | GCA_001465935.1 | UMass Amherst                                                 |
| 551 | <i>Alternaria brassicae</i>         | Dothideo | Asco    | 53 | 56 | 35 | 44 | 188 | GCA_004936725.1 | University of Delhi South Campus                              |
| 552 | <i>Fusarium hainanense</i>          | Sordario | Asco    | 50 | 60 | 40 | 38 | 188 | GCA_013618405.1 | US Department of Agriculture, Agriculture Research Service    |
| 553 | <i>Claviceps sp. SE16F4</i>         | Leotio   | Asco    | 50 | 63 | 31 | 44 | 188 | GCA_002242985.1 | Rutgers University                                            |
| 554 | <i>Peniophora sp. CBMAI 1063</i>    | Agarico  | Basidio | 45 | 45 | 24 | 73 | 187 | GCA_900536885.1 | LABORATORIO NACIONAL DE CIENCIA E TECNOLOGIA DO BI            |
| 555 | <i>Hysterium pulicare</i>           | Dothideo | Asco    | 55 | 40 | 36 | 56 | 187 | GCA_000467715.1 | Assembling the Fungal Tree of Life (AFTOL)                    |
| 556 | <i>Hypoxylon sp. EC38</i>           | Sordario | Asco    | 58 | 40 | 40 | 49 | 187 | GCA_002120335.1 | DOE Joint Genome Institute                                    |
| 557 | <i>Pleurotus salmoneostramineus</i> | Agarico  | Basidio | 56 | 33 | 28 | 70 | 187 | GCA_002933715.1 | Applied Bioscience, Kindai University, Faculty of Agriculture |
| 558 | <i>Coniochaeta prunicola</i>        | Sordario | Asco    | 54 | 50 | 46 | 36 | 186 | GCA_007388105.1 | University of Arizona                                         |
| 559 | <i>Aspergillus pseudonomius</i>     | Eurotio  | Asco    | 51 | 73 | 26 | 36 | 186 | GCA_009176395.1 | DOE Joint Genome Institute                                    |
| 560 | <i>Aspergillus fumigatiaffinis</i>  | Eurotio  | Asco    | 53 | 70 | 33 | 30 | 186 | GCA_012656285.1 | UNICAMP                                                       |
| 561 | <i>Fusarium virguliforme</i>        | Sordario | Asco    | 55 | 65 | 30 | 36 | 186 | GCA_013363175.1 | US Department of Agriculture, Agriculture Research Service    |
| 562 | <i>Fusarium compactum</i>           | Sordario | Asco    | 49 | 62 | 34 | 41 | 186 | GCA_013618385.1 | US Department of Agriculture, Agriculture Research Service    |
| 563 | <i>Daldinia childiae</i>            | Sordario | Asco    | 64 | 38 | 34 | 50 | 186 | GCA_008694065.1 | National Institute of Biological Resources                    |
| 564 | <i>Spermospora avenae</i>           | 0        | Asco    | 57 | 49 | 42 | 38 | 186 | GCA_014282315.1 | Agribio-Center for Agribioscience                             |
| 565 | <i>Hypoxylon sp. CI-4A</i>          | Sordario | Asco    | 60 | 40 | 36 | 50 | 186 | GCA_002120315.1 | DOE Joint Genome Institute                                    |
| 566 | <i>Fusarium nanum</i>               | Sordario | Asco    | 46 | 60 | 43 | 36 | 185 | GCA_004367095.1 | US Department of Agriculture, Agriculture Research Service    |
| 567 | <i>Entonaema liquescens</i>         | Sordario | Asco    | 63 | 36 | 36 | 50 | 185 | GCA_902805475.1 | CEBITEC                                                       |
| 568 | <i>Magnaportheales sp. P1609</i>    | Sordario | Asco    | 66 | 33 | 37 | 48 | 184 | GCA_003709005.1 | Fujian Agriculture and Forestry University                    |
| 569 | <i>Monosporascus cannonballus</i>   | Sordario | Asco    | 52 | 54 | 32 | 46 | 184 | GCA_004155895.1 | University of New Mexico                                      |
| 570 | <i>Pyricularia oryzae</i>           | Sordario | Asco    | 63 | 34 | 38 | 49 | 184 | GCA_004785725.1 | Kansas State University                                       |
| 571 | <i>Fusarium graminearum</i>         | Sordario | Asco    | 48 | 61 | 36 | 39 | 184 | GCA_900044135.1 | ROTHAMSTED RESEARCH                                           |
| 572 | <i>Helotiales sp. DMI_Dod_Qol</i>   | Leotio   | Asco    | 47 | 40 | 42 | 55 | 184 | GCA_009613015.1 | ARS                                                           |
| 573 | <i>Rhynchosporium agropyri</i>      | Leotio   | Asco    | 54 | 47 | 41 | 42 | 184 | GCA_900074905.1 | Technische Universitat Munchen - WZW                          |

|     |                                    |          |         |    |    |    |    |     |                 |                                                                           |
|-----|------------------------------------|----------|---------|----|----|----|----|-----|-----------------|---------------------------------------------------------------------------|
| 574 | <i>Rhynchosporium commune</i>      | Leotio   | Asco    | 53 | 46 | 43 | 42 | 184 | GCA_900074885.1 | Technische Universitat Munchen - WZW                                      |
| 575 | <i>Elsinoe arachidis</i>           | Dothideo | Asco    | 46 | 68 | 32 | 38 | 184 | GCA_013372555.1 | Shenyang Agricultural University                                          |
| 576 | <i>Pleurotus pulmonarius</i>       | Agarico  | Basidio | 66 | 26 | 20 | 72 | 184 | GCA_012980535.1 | Academia Sinica                                                           |
| 577 | <i>Zasmidium angulare</i>          | Dothideo | Asco    | 46 | 57 | 26 | 54 | 183 | GCA_002786045.1 | Northwest A&F University                                                  |
| 578 | <i>Pyricularia sp. CBS 133598</i>  | Sordario | Asco    | 62 | 36 | 39 | 46 | 183 | GCA_004337975.1 | Academia Sinica                                                           |
| 579 | <i>Aspergillus lentulus</i>        | Eurotio  | Asco    | 53 | 69 | 34 | 27 | 183 | GCA_010724575.1 | Medical Mycology Research Center                                          |
| 580 | <i>Coniochaeta sp. YLH0009</i>     | Sordario | Asco    | 52 | 48 | 47 | 36 | 183 | GCA_007388125.1 | University of Arizona                                                     |
| 581 | <i>Fusarium anguioides</i>         | Sordario | Asco    | 50 | 49 | 40 | 44 | 183 | GCA_012977745.1 | US Department of Agriculture, Agriculture Research Service                |
| 582 | <i>Fusarium cortaderiae</i>        | Sordario | Asco    | 49 | 59 | 34 | 41 | 183 | GCA_009617495.1 | University of Sao Paulo                                                   |
| 583 | <i>Fusarium transvaalense</i>      | Sordario | Asco    | 52 | 58 | 35 | 38 | 183 | GCA_013623685.1 | US Department of Agriculture, Agriculture Research Service                |
| 584 | <i>Diplodia sapinea</i>            | Dothideo | Asco    | 47 | 67 | 23 | 46 | 183 | GCA_000671355.1 | Forestry and Agricultural Biotechnology Institute, University of Pretoria |
| 585 | <i>Fusarium subclunatum</i>        | Sordario | Asco    | 44 | 72 | 29 | 38 | 183 | GCA_013623665.1 | US Department of Agriculture, Agriculture Research Service                |
| 586 | <i>Clariireedia jacksonii</i>      | Leotio   | Asco    | 46 | 66 | 30 | 41 | 183 | GCA_002242905.1 | Rutgers University                                                        |
| 587 | <i>Podospora comata</i>            | Sordario | Asco    | 58 | 23 | 48 | 54 | 183 | GCA_900290415.1 | IED                                                                       |
| 588 | <i>Podospora anserina</i>          | Sordario | Asco    | 58 | 23 | 48 | 54 | 183 | GCA_005222925.1 | Lomonosov Moscow State University                                         |
| 589 | <i>Pseudocercospora macadamiae</i> | Dothideo | Asco    | 46 | 60 | 22 | 54 | 182 | GCA_012978405.1 | University of Queensland                                                  |
| 590 | <i>Magnaporthe sp. MG05</i>        | Sordario | Asco    | 60 | 35 | 39 | 48 | 182 | GCA_001936065.1 | Centre for Cellular and Molecular Platforms                               |
| 591 | <i>Coniochaeta sp. NC1642</i>      | Sordario | Asco    | 52 | 48 | 46 | 36 | 182 | GCA_007388135.1 | University of Arizona                                                     |
| 592 | <i>Coniochaeta sp. AEA 9055</i>    | Sordario | Asco    | 53 | 48 | 45 | 36 | 182 | GCA_007388195.1 | University of Arizona                                                     |
| 593 | <i>Coniochaeta sp. AEA 9094</i>    | Sordario | Asco    | 53 | 48 | 45 | 36 | 182 | GCA_007388145.1 | University of Arizona                                                     |
| 594 | <i>Didymella exigua</i>            | Dothideo | Asco    | 46 | 78 | 19 | 39 | 182 | GCA_010094145.1 | DOE Joint Genome Institute                                                |
| 595 | <i>Fusarium meridionale</i>        | Sordario | Asco    | 48 | 59 | 35 | 40 | 182 | GCA_009617515.1 | University of Sao Paulo                                                   |
| 596 | <i>Valsa mali</i>                  | Sordario | Asco    | 52 | 66 | 20 | 44 | 182 | GCA_000818155.1 | Northwest A&F University                                                  |
| 597 | <i>Tubaria furfuracea</i>          | Agarico  | Basidio | 38 | 93 | 30 | 20 | 181 | GCA_900069095.1 | Royal Botanic Gardens, Kew                                                |
| 598 | <i>Coniochaeta sp. IL0111</i>      | Sordario | Asco    | 53 | 48 | 44 | 36 | 181 | GCA_007388115.1 | University of Arizona                                                     |
| 599 | <i>Aspergillus leporis</i>         | Eurotio  | Asco    | 48 | 72 | 28 | 33 | 181 | GCA_009176345.1 | DOE Joint Genome Institute                                                |
| 600 | <i>Fusarium austroamericanum</i>   | Sordario | Asco    | 47 | 60 | 35 | 39 | 181 | GCA_009617525.1 | University of Sao Paulo                                                   |
| 601 | <i>Fusarium kyushuense</i>         | Sordario | Asco    | 49 | 57 | 34 | 41 | 181 | GCA_013184315.1 | US Department of Agriculture, Agriculture Research Service                |
| 602 | <i>Alternaria brassicicola</i>     | Dothideo | Asco    | 50 | 56 | 34 | 41 | 181 | GCA_002796735.1 | IRHS                                                                      |
| 603 | <i>Dendrothele bispora</i>         | Agarico  | Basidio | 46 | 26 | 19 | 90 | 181 | GCA_004369135.1 | DOE Joint Genome Institute                                                |
| 604 | <i>Gaeumannomyces sp. JS-464</i>   | Sordario | Asco    | 64 | 31 | 35 | 50 | 180 | GCA_002197995.1 | National Institute of Biological Resources                                |
| 605 | <i>Monosporascus sp. MC13-8B</i>   | Sordario | Asco    | 52 | 53 | 32 | 43 | 180 | GCA_004154975.1 | University of New Mexico                                                  |

|     |                                     |          |         |    |    |    |    |     |                 |                                                                     |
|-----|-------------------------------------|----------|---------|----|----|----|----|-----|-----------------|---------------------------------------------------------------------|
| 606 | <i>Lizonia empirigonia</i>          | Dothideo | Asco    | 50 | 62 | 26 | 42 | 180 | GCA_009982855.1 | DOE Joint Genome Institute                                          |
| 607 | <i>Fusarium brasilicum</i>          | Sordario | Asco    | 47 | 59 | 35 | 39 | 180 | GCA_013184295.1 | US Department of Agriculture,<br>Agriculture Research Service       |
| 608 | <i>Polyporus brumalis</i>           | Agarico  | Basidio | 59 | 28 | 26 | 67 | 180 | GCA_001792895.1 | National Institute of Forest<br>Science                             |
| 609 | <i>Didymosphaeria enalia</i>        | Dothideo | Asco    | 59 | 33 | 32 | 56 | 180 | GCA_010094045.1 | DOE Joint Genome Institute                                          |
| 610 | <i>Laburnicola sp. R22_1</i>        | Dothideo | Asco    | 52 | 54 | 32 | 41 | 179 | GCA_014281115.1 | Chinese Academy of Forestry                                         |
| 611 | <i>Fusarium asiaticum</i>           | Sordario | Asco    | 48 | 58 | 35 | 38 | 179 | GCA_001717845.1 | Government of Canada                                                |
| 612 | <i>Penicillium sclerotiorum</i>     | Eurotio  | Asco    | 46 | 70 | 28 | 35 | 179 | GCA_001750025.1 | Rutgers, The State University of<br>New Jersey                      |
| 613 | <i>Fusarium culmorum</i>            | Sordario | Asco    | 46 | 58 | 36 | 39 | 179 | GCA_003033665.1 | NIOO-KNAW                                                           |
| 614 | <i>Fusarium heterosporum</i>        | Sordario | Asco    | 49 | 53 | 38 | 39 | 179 | GCA_013396295.1 | US Department of Agriculture,<br>Agriculture Research Service       |
| 615 | <i>Scedosporium dehoogii</i>        | Sordario | Asco    | 64 | 20 | 44 | 51 | 179 | GCA_002812735.1 | GEIHP, UPRES EA 3142                                                |
| 616 | <i>Magnaporthe sp. MG08</i>         | Sordario | Asco    | 59 | 35 | 38 | 46 | 178 | GCA_001936555.1 | Centre for Cellular and<br>Molecular Platforms                      |
| 617 | <i>Diplodia corticola</i>           | Dothideo | Asco    | 46 | 66 | 22 | 44 | 178 | GCA_001883845.1 | University of Aveiro                                                |
| 618 | <i>Fusarium dimerum</i>             | Sordario | Asco    | 45 | 68 | 32 | 33 | 178 | GCA_013623525.1 | US Department of Agriculture,<br>Agriculture Research Service       |
| 619 | <i>Fusarium praegraminearum</i>     | Sordario | Asco    | 48 | 57 | 36 | 37 | 178 | GCA_002093855.1 | US Department of Agriculture,<br>Agriculture Research Service       |
| 620 | <i>Pyrenophora tritici-repentis</i> | Dothideo | Asco    | 51 | 49 | 31 | 47 | 178 | GCA_008692205.1 | Curtin University                                                   |
| 621 | <i>Rhynchosporium secalis</i>       | Leotio   | Asco    | 54 | 42 | 41 | 41 | 178 | GCA_900074895.1 | Technische Universitat<br>Munchen - WZW                             |
| 622 | <i>Grammothele lineata</i>          | Agarico  | Basidio | 49 | 30 | 30 | 69 | 178 | GCA_002150815.3 | Molecular Biology Lab                                               |
| 623 | <i>Fusarium illudens</i>            | Sordario | Asco    | 50 | 63 | 30 | 35 | 178 | GCA_013623515.1 | US Department of Agriculture,<br>Agriculture Research Service       |
| 624 | <i>Auriculariopsis ampla</i>        | Agarico  | Basidio | 48 | 54 | 32 | 43 | 177 | GCA_007026445.1 | DOE Joint Genome Institute                                          |
| 625 | <i>Aspergillus felis</i>            | Eurotio  | Asco    | 47 | 66 | 37 | 27 | 177 | GCA_014281915.1 | UNICAMP                                                             |
| 626 | <i>Aspergillus bertholletiae</i>    | Eurotio  | Asco    | 48 | 72 | 23 | 34 | 177 | GCA_009193595.1 | DOE Joint Genome Institute                                          |
| 627 | <i>Curvularia sp. IFB-Z10</i>       | Dothideo | Asco    | 55 | 42 | 33 | 47 | 177 | GCA_002161795.1 | Nanjing University                                                  |
| 628 | <i>Annulohypoxylon truncatum</i>    | Sordario | Asco    | 51 | 42 | 36 | 48 | 177 | GCA_902805465.1 | CEBITEC                                                             |
| 629 | <i>Exserohilum turcicum</i>         | Dothideo | Asco    | 53 | 48 | 33 | 43 | 177 | GCA_000359705.1 | JGI                                                                 |
| 630 | <i>Taxomyces andreae</i>            | 0        | Asco    | 61 | 18 | 31 | 67 | 177 | GCA_001969225.1 | Fraunhofer                                                          |
| 631 | <i>Moniliophthora roleri</i>        | Agarico  | Basidio | 54 | 31 | 22 | 70 | 177 | GCA_001466705.1 | Purdue University                                                   |
| 632 | <i>Phanerochaete chrysosporium</i>  | Agarico  | Basidio | 60 | 18 | 25 | 74 | 177 | GCA_001910725.1 | National Institute of Forest<br>Science                             |
| 633 | <i>Scedosporium sp. IMV 00882</i>   | Sordario | Asco    | 63 | 20 | 43 | 51 | 177 | GCA_001931805.1 | Jet Propulsion Laboratory,<br>California Institute of<br>Technology |
| 634 | <i>Magnaporthe sp. MG12</i>         | Sordario | Asco    | 59 | 35 | 37 | 45 | 176 | GCA_001936955.1 | Centre for Cellular and<br>Molecular Platforms                      |
| 635 | <i>Gaeumannomyces tritici</i>       | Sordario | Asco    | 61 | 32 | 34 | 49 | 176 | GCA_000145635.1 | Broad Institute                                                     |
| 636 | <i>Aspergillus quadrilineatus</i>   | Eurotio  | Asco    | 46 | 69 | 30 | 31 | 176 | GCA_013305525.1 | Vanderbilt University                                               |

|     |                                     |          |         |    |    |    |    |     |                 |                                                                         |
|-----|-------------------------------------|----------|---------|----|----|----|----|-----|-----------------|-------------------------------------------------------------------------|
| 637 | <i>Fusarium pseudograminearum</i>   | Sordario | Asco    | 46 | 57 | 36 | 37 | 176 | GCA_000303195.2 | CSIRO                                                                   |
| 638 | <i>Aspergillus udagawae</i>         | Eurotio  | Asco    | 49 | 64 | 32 | 30 | 175 | GCA_010724255.1 | Medical Mycology Research Center                                        |
| 639 | <i>Hawksworthiomyces lignivorus</i> | Sordario | Asco    | 49 | 37 | 44 | 45 | 175 | GCA_002917075.1 | University of Pretoria                                                  |
| 640 | <i>Bipolaris cookei</i>             | Dothideo | Asco    | 56 | 44 | 30 | 45 | 175 | GCA_002286855.1 | University of Arkansas                                                  |
| 641 | <i>Fusarium zanthoxyli</i>          | Sordario | Asco    | 40 | 69 | 31 | 35 | 175 | GCA_013623745.1 | US Department of Agriculture, Agriculture Research Service              |
| 642 | <i>Daldinia eschscholtzii</i>       | Sordario | Asco    | 57 | 38 | 34 | 46 | 175 | GCA_001951055.1 | nanjing university                                                      |
| 643 | <i>Daldinia concentrica</i>         | Sordario | Asco    | 57 | 38 | 34 | 46 | 175 | GCA_902805455.1 | CEBITEC                                                                 |
| 644 | <i>Alternaria gansuensis</i>        | Dothideo | Asco    | 51 | 51 | 30 | 43 | 175 | GCA_009289805.1 | Lanzhou University                                                      |
| 645 | <i>Clavaria fumosa</i>              | Agarico  | Basidio | 26 | 78 | 45 | 25 | 174 | GCA_001179745.1 | Royal Botanic Gardens, Kew                                              |
| 646 | <i>Microdochium bolleyi</i>         | Sordario | Asco    | 52 | 52 | 27 | 43 | 174 | GCA_001566295.1 | DOE Joint Genome Institute                                              |
| 647 | <i>Aspergillus terreus</i>          | Eurotio  | Asco    | 49 | 57 | 39 | 29 | 174 | GCA_009834425.1 | Nanyang Technological University                                        |
| 648 | <i>Fusarium longipes</i>            | Sordario | Asco    | 46 | 51 | 37 | 40 | 174 | GCA_013618495.1 | US Department of Agriculture, Agriculture Research Service              |
| 649 | <i>Diplodia scrobiculata</i>        | Dothideo | Asco    | 44 | 64 | 20 | 46 | 174 | GCA_001455585.1 | Forestry & Agricultural Biotechnology Institute, University of Pretoria |
| 650 | <i>Fusarium subtropicale</i>        | Sordario | Asco    | 47 | 57 | 33 | 37 | 174 | GCA_003670145.1 | US Department of Agriculture, Agriculture Research Service              |
| 651 | <i>Lanzia echinophila</i>           | Leotio   | Asco    | 53 | 53 | 18 | 50 | 174 | GCA_000812885.1 | USDA-ARS                                                                |
| 652 | <i>Corioloopsis trogii</i>          | Agarico  | Basidio | 48 | 32 | 24 | 70 | 174 | GCA_007896425.1 | Kunming University of Science and Technology                            |
| 653 | <i>Hypoxylon rickii</i>             | Sordario | Asco    | 55 | 37 | 36 | 46 | 174 | GCA_902806535.1 | CEBITEC                                                                 |
| 654 | <i>Armillaria cepistipes</i>        | Agarico  | Basidio | 47 | 39 | 20 | 68 | 174 | GCA_900157415.1 | Technische Universitat Munchen - WZW                                    |
| 655 | <i>Uromyces transversalis</i>       | Puccinio | Basidio | 50 | 64 | 19 | 40 | 173 | GCA_002994575.1 | University of Georgia                                                   |
| 656 | <i>Cercospora brassicicola</i>      | Dothideo | Asco    | 47 | 40 | 28 | 58 | 173 | GCA_013365245.1 | Banaras Hindu University                                                |
| 657 | <i>Fusarium poae</i>                | Sordario | Asco    | 45 | 54 | 33 | 41 | 173 | GCA_001675295.1 | Wageningen UR                                                           |
| 658 | <i>Sarocladium brachiariae</i>      | Sordario | Asco    | 55 | 41 | 47 | 30 | 173 | GCA_008271525.1 | Environment and Plant Protection Institute                              |
| 659 | <i>Dactylellina haptotyla</i>       | Orbilio  | Asco    | 47 | 72 | 27 | 27 | 173 | GCA_000441935.1 | Lund University                                                         |
| 660 | <i>Armillaria gallica</i>           | Agarico  | Basidio | 51 | 32 | 17 | 73 | 173 | GCA_012064365.1 | Yunnan Minzu University                                                 |
| 661 | <i>Cantharellus lutescens</i>       | Agarico  | Basidio | 30 | 81 | 41 | 20 | 172 | GCA_003314295.1 | Kunming University of Science and Technology                            |
| 662 | <i>Penicillium arizonense</i>       | Eurotio  | Asco    | 50 | 64 | 23 | 35 | 172 | GCA_001773325.1 | Chalmers University of Technology                                       |
| 663 | <i>Valsa malicola</i>               | Sordario | Asco    | 44 | 68 | 23 | 37 | 172 | GCA_003795315.1 | Northwest A&F University                                                |
| 664 | <i>Aspergillus mulundensis</i>      | Eurotio  | Asco    | 50 | 70 | 25 | 27 | 172 | GCA_003369625.1 | The University of Texas Health Science Center at Houston                |
| 665 | <i>Daldinia sp. EC12</i>            | Sordario | Asco    | 54 | 36 | 38 | 44 | 172 | GCA_002120325.1 | DOE Joint Genome Institute                                              |
| 666 | <i>Leptosphaeria biglobosa</i>      | Dothideo | Asco    | 48 | 54 | 31 | 39 | 172 | GCA_900465125.1 | GSC                                                                     |

|     |                                                  |          |         |    |    |    |    |     |                 |                                                                                                                                                      |
|-----|--------------------------------------------------|----------|---------|----|----|----|----|-----|-----------------|------------------------------------------------------------------------------------------------------------------------------------------------------|
| 667 | <i>Penicillium capsulatum</i>                    | Eurotio  | Asco    | 52 | 58 | 23 | 38 | 171 | GCA_000943775.1 | Shanghai Key Laboratory of Molecular Medical Mycology, Department of Dermatology, Shanghai Changzheng Hospital; Academy of Military Medical Sciences |
| 668 | <i>Magnaportheopsis rhizophila</i>               | Sordario | Asco    | 58 | 35 | 35 | 43 | 171 | GCA_003049465.1 | Agricultural Research Service, United States Department of Agriculture                                                                               |
| 669 | <i>Laburnicola</i> sp. JP-R-44                   | Dothideo | Asco    | 46 | 56 | 31 | 38 | 171 | GCA_009805535.1 | Chinese Academy of Forestry                                                                                                                          |
| 670 | <i>Coniochaeta hoffmannii</i>                    | Sordario | Asco    | 51 | 37 | 44 | 39 | 171 | GCA_002798055.1 | IHI Zittau / TU Dresden                                                                                                                              |
| 671 | <i>Aspergillus spinulosporus</i>                 | Eurotio  | Asco    | 48 | 69 | 25 | 29 | 171 | GCA_013305485.1 | Vanderbilt University                                                                                                                                |
| 672 | <i>Polyporus arcularius</i>                      | Agarico  | Basidio | 46 | 28 | 26 | 71 | 171 | GCA_004369055.1 | DOE Joint Genome Institute                                                                                                                           |
| 673 | <i>Pseudogymnoascus</i> sp. VKM F-4281 (FW-2241) | Leotio   | Asco    | 53 | 52 | 36 | 30 | 171 | GCA_000750745.1 | Moscow State University                                                                                                                              |
| 674 | <i>Magnaportheopsis incrustans</i>               | Sordario | Asco    | 55 | 35 | 35 | 45 | 170 | GCA_003049425.1 | Agricultural Research Service, United States Department of Agriculture                                                                               |
| 675 | <i>Pyricularia grisea</i>                        | Sordario | Asco    | 59 | 32 | 35 | 44 | 170 | GCA_003933175.1 | IARI                                                                                                                                                 |
| 676 | <i>Pyricularia pennisetigena</i>                 | Sordario | Asco    | 60 | 32 | 35 | 43 | 170 | GCA_004337985.1 | Academia Sinica                                                                                                                                      |
| 677 | <i>Talaromyces stollii</i>                       | Eurotio  | Asco    | 36 | 65 | 38 | 31 | 170 | GCA_014065225.1 | Beijing University of Chemical Technology                                                                                                            |
| 678 | <i>Ganoderma lucidum</i>                         | Agarico  | Basidio | 44 | 34 | 28 | 64 | 170 | GCA_000271565.1 | The Institute of Medicinal Plant Development                                                                                                         |
| 679 | <i>Aureobasidium pullulans</i>                   | Dothideo | Asco    | 47 | 60 | 28 | 35 | 170 | GCA_000721785.1 | DOE Joint Genome Institute                                                                                                                           |
| 680 | <i>Elsinoe fawcettii</i>                         | Dothideo | Asco    | 42 | 69 | 26 | 33 | 170 | GCA_012977835.1 | University of Southern Queensland                                                                                                                    |
| 681 | <i>Basipetospora chlamydospora</i>               | Eurotio  | Asco    | 52 | 17 | 59 | 42 | 170 | GCA_001599675.1 | RIKEN Center for Life Science Technologies, Division of Genomic Technologies                                                                         |
| 682 | <i>Aspergillus novofumigatus</i>                 | Eurotio  | Asco    | 46 | 70 | 29 | 24 | 169 | GCA_002847465.1 | DOE Joint Genome Institute                                                                                                                           |
| 683 | <i>Penicillium brasilianum</i>                   | Eurotio  | Asco    | 49 | 63 | 28 | 29 | 169 | GCA_001048715.1 | HKI JENA                                                                                                                                             |
| 684 | <i>Aspergillus pseudoterreus</i>                 | Eurotio  | Asco    | 48 | 52 | 39 | 30 | 169 | GCA_002927005.1 | Pacific Northwest National Lab                                                                                                                       |
| 685 | <i>Fusarium langsethiae</i>                      | Sordario | Asco    | 49 | 52 | 32 | 36 | 169 | GCA_001292635.1 | Bioforsk                                                                                                                                             |
| 686 | <i>Pirottaea palmicola</i>                       | Leotio   | Asco    | 54 | 40 | 30 | 45 | 169 | GCA_003988945.1 | Manaaki Whenua Landcare Research                                                                                                                     |
| 687 | <i>Talaromyces rugulosus</i>                     | Eurotio  | Asco    | 36 | 58 | 30 | 44 | 168 | GCA_013368755.1 | Xi'an Jiaotong University                                                                                                                            |
| 688 | <i>Fusarium penzigii</i>                         | Sordario | Asco    | 47 | 59 | 32 | 30 | 168 | GCA_013623535.1 | US Department of Agriculture, Agriculture Research Service                                                                                           |
| 689 | <i>Sarocladium oryzae</i>                        | Sordario | Asco    | 55 | 38 | 43 | 32 | 168 | GCA_001972265.1 | RIKEN Center for Life Science Technologies, Division of Genomic Technologies                                                                         |
| 690 | <i>Stereum hirsutum</i>                          | Agarico  | Basidio | 46 | 41 | 21 | 60 | 168 | GCA_000264905.1 | JGI                                                                                                                                                  |
| 691 | <i>Botrytis tulipae</i>                          | Leotio   | Asco    | 48 | 58 | 18 | 44 | 168 | GCA_004786125.1 | Wageningen University                                                                                                                                |



|     |                                          |          |         |    |    |    |    |     |                 |                                                                              |
|-----|------------------------------------------|----------|---------|----|----|----|----|-----|-----------------|------------------------------------------------------------------------------|
| 692 | <i>Nakataea oryzae</i>                   | Sordario | Asco    | 56 | 30 | 36 | 45 | 167 | GCA_003049435.1 | Agricultural Research Service,<br>United States Department of<br>Agriculture |
| 693 | <i>Jackrogersella multiformis</i>        | Sordario | Asco    | 49 | 41 | 34 | 43 | 167 | GCA_902806575.1 | CEBITEC                                                                      |
| 694 | <i>Cladosporium sphaerospermum</i>       | Dothideo | Asco    | 42 | 54 | 32 | 39 | 167 | GCA_000261425.2 | UNIVERSITY OF MALAYA                                                         |
| 695 | <i>Talaromyces wortmannii</i>            | Eurotio  | Asco    | 36 | 58 | 34 | 38 | 166 | GCA_001939245.1 | Universidad Nacional Agraria La<br>Molina,                                   |
| 696 | <i>Mycena chlorophos</i>                 | Agarico  | Basidio | 40 | 35 | 27 | 64 | 166 | GCA_001612595.1 | KEIO UNIVERSITY                                                              |
| 697 | <i>Pseudocercospora pini-densiflorae</i> | Dothideo | Asco    | 44 | 51 | 21 | 50 | 166 | GCA_000504365.2 | Canada's Michael Smith<br>Genome Sciences Centre                             |
| 698 | <i>Aspergillus thermomutatus</i>         | Eurotio  | Asco    | 47 | 62 | 30 | 27 | 166 | GCA_002237265.2 | University of Montreal                                                       |
| 699 | <i>Valsa sordida</i>                     | Sordario | Asco    | 42 | 66 | 23 | 35 | 166 | GCA_003795275.1 | Northwest A&F University                                                     |
| 700 | <i>Penicillium paxilli</i>               | Eurotio  | Asco    | 42 | 68 | 21 | 35 | 166 | GCA_000347475.1 | Massey University                                                            |
| 701 | <i>Aspergillus brasiliensis</i>          | Eurotio  | Asco    | 44 | 65 | 18 | 39 | 166 | GCA_001889945.1 | DOE Joint Genome Institute                                                   |
| 702 | <i>Fusarium nurragi</i>                  | Sordario | Asco    | 44 | 51 | 36 | 35 | 166 | GCA_012977755.1 | US Department of Agriculture,<br>Agriculture Research Service                |
| 703 | <i>Fusarium continuum</i>                | Sordario | Asco    | 40 | 64 | 28 | 34 | 166 | GCA_013184455.1 | US Department of Agriculture,<br>Agriculture Research Service                |
| 704 | <i>Cladosporium sp. TM138-S3</i>         | Dothideo | Asco    | 42 | 53 | 32 | 39 | 166 | GCA_011745625.1 | Hellenic Centre of Marine<br>Research (HCMR)                                 |
| 705 | <i>Botrytis fabae</i>                    | Leotio   | Asco    | 45 | 59 | 20 | 42 | 166 | GCA_004335055.1 | Curtin University                                                            |
| 706 | <i>Botrytis elliptica</i>                | Leotio   | Asco    | 45 | 58 | 22 | 41 | 166 | GCA_004786205.1 | Wageningen University                                                        |
| 707 | <i>Botrytis galanthina</i>               | Leotio   | Asco    | 46 | 59 | 20 | 41 | 166 | GCA_004916875.1 | Wageningen University                                                        |
| 708 | <i>Pterula gracilis</i>                  | Agarico  | Basidio | 55 | 28 | 22 | 61 | 166 | GCA_004369125.1 | DOE Joint Genome Institute                                                   |
| 709 | <i>Fusarium zealandicum</i>              | Sordario | Asco    | 42 | 68 | 24 | 32 | 166 | GCA_013266195.1 | US Department of Agriculture,<br>Agriculture Research Service                |
| 710 | <i>Dictyopanus pusillus</i>              | Agarico  | Basidio | 36 | 26 | 32 | 72 | 166 | GCA_013387415.1 | INRS-Institut Armand-Frappier                                                |
| 711 | <i>Puccinia arachidis</i>                | Puccinio | Basidio | 52 | 54 | 34 | 25 | 165 | GCA_001013415.1 | Junagadh Agricultural<br>University                                          |
| 712 | <i>Aspergillus fischeri</i>              | Eurotio  | Asco    | 50 | 62 | 27 | 26 | 165 | GCA_008711165.1 | UMass Amherst                                                                |
| 713 | <i>Lentinus tigrinus</i>                 | Agarico  | Basidio | 43 | 28 | 24 | 70 | 165 | GCA_003813185.1 | DOE Joint Genome Institute                                                   |
| 714 | <i>Massariosphaeria phaeospora</i>       | Dothideo | Asco    | 51 | 30 | 35 | 49 | 165 | GCA_011032825.1 | DOE Joint Genome Institute                                                   |
| 715 | <i>Aspergillus sp. CLMG-2019a</i>        | Eurotio  | Asco    | 47 | 60 | 22 | 35 | 164 | GCA_013421405.1 | The University of Western<br>Australia                                       |
| 716 | <i>Aspergillus nidulans</i>              | Eurotio  | Asco    | 42 | 64 | 26 | 32 | 164 | GCA_011074995.1 | Barcelona Supercomputing<br>center (BSC)                                     |
| 717 | <i>Pyrenophora teres</i>                 | Dothideo | Asco    | 48 | 40 | 32 | 44 | 164 | GCA_008086845.1 | NDSU                                                                         |
| 718 | <i>Botrytis cinerea</i>                  | Leotio   | Asco    | 44 | 59 | 20 | 41 | 164 | GCA_000292645.1 | Wageningen University                                                        |
| 719 | <i>Aspergillus welwitschiae</i>          | Eurotio  | Asco    | 42 | 67 | 16 | 39 | 164 | GCA_009761105.1 | Universidade Federal de Minas<br>Gerais                                      |
| 720 | <i>Aureobasidium namibiae</i>            | Dothideo | Asco    | 46 | 53 | 29 | 36 | 164 | GCA_000721765.1 | DOE Joint Genome Institute                                                   |
| 721 | <i>Pyrenophora graminea</i>              | Dothideo | Asco    | 48 | 40 | 32 | 43 | 163 | GCA_012365135.1 | USDA-ARS                                                                     |
| 722 | <i>Pyrenophora seminiperda</i>           | Dothideo | Asco    | 48 | 41 | 33 | 41 | 163 | GCA_000465215.2 | Brigham Young University                                                     |
| 723 | <i>Aspergillus phoenicis</i>             | Eurotio  | Asco    | 42 | 68 | 14 | 39 | 163 | GCA_003344505.1 | DOE Joint Genome Institute                                                   |

|     |                                  |          |         |    |    |    |    |     |                 |                                                                                                                                           |
|-----|----------------------------------|----------|---------|----|----|----|----|-----|-----------------|-------------------------------------------------------------------------------------------------------------------------------------------|
| 724 | <i>Botrytis hyacinthi</i>        | Leotio   | Asco    | 44 | 58 | 20 | 41 | 163 | GCA_004786245.1 | Wageningen University                                                                                                                     |
| 725 | <i>Coprinellus angulatus</i>     | Agarico  | Basidio | 44 | 12 | 50 | 57 | 163 | GCA_013368325.1 | Lund University                                                                                                                           |
| 726 | <i>Delitschia confertasporea</i> | Dothideo | Asco    | 48 | 26 | 36 | 53 | 163 | GCA_010093945.1 | DOE Joint Genome Institute                                                                                                                |
| 727 | <i>Pseudocercospora fuligena</i> | Dothideo | Asco    | 46 | 50 | 18 | 48 | 162 | GCA_014298035.1 | University of California                                                                                                                  |
| 728 | <i>Leptosphaeria maculans</i>    | Dothideo | Asco    | 47 | 50 | 28 | 37 | 162 | GCA_900465115.1 | GSC                                                                                                                                       |
| 729 | <i>Botrytis paeoniae</i>         | Leotio   | Asco    | 46 | 55 | 18 | 43 | 162 | GCA_001005785.1 | Washington State University                                                                                                               |
| 730 | <i>Dichomitus squalens</i>       | Agarico  | Basidio | 46 | 31 | 21 | 64 | 162 | GCA_004307925.1 | DOE Joint Genome Institute<br>CBS-KNAW Fungal Biodiversity<br>Centre Institute of the Royal<br>Netherlands Academy of Arts<br>and Science |
| 731 | <i>Trametes pubescens</i>        | Agarico  | Basidio | 48 | 23 | 23 | 68 | 162 | GCA_001895945.1 | IHI Zittau / TU Dresden                                                                                                                   |
| 732 | <i>Psathyrella aberdarensis</i>  | Agarico  | Basidio | 56 | 8  | 36 | 62 | 162 | GCA_004126415.1 | The Federal Research Centre<br>"Fundamentals of<br>Biotechnology" of the Russian<br>Academy of Sciences                                   |
| 733 | <i>Steccherinum ochraceum</i>    | Agarico  | Basidio | 50 | 16 | 30 | 66 | 162 | GCA_004332605.1 | University of California,<br>Riverside                                                                                                    |
| 734 | <i>Friedmanniomyces simplex</i>  | Dothideo | Asco    | 43 | 34 | 44 | 40 | 161 | GCA_005059865.1 | JGI                                                                                                                                       |
| 735 | <i>Trametes versicolor</i>       | Agarico  | Basidio | 46 | 24 | 23 | 68 | 161 | GCA_000271585.1 | University of Maryland, College<br>Park                                                                                                   |
| 736 | <i>Botrytis fragariae</i>        | Leotio   | Asco    | 45 | 56 | 18 | 42 | 161 | GCA_013461495.1 | Beijing Institute of Genomics,<br>CAS                                                                                                     |
| 737 | <i>Agrocybe cylindracea</i>      | Agarico  | Basidio | 55 | 20 | 24 | 62 | 161 | GCA_013376435.1 | Australian National University                                                                                                            |
| 738 | <i>Scedosporium aurantiacum</i>  | Sordario | Asco    | 58 | 17 | 40 | 46 | 161 | GCA_000812075.1 | Kunming University of Science<br>and Technology                                                                                           |
| 739 | <i>Macrolepiota dolichaula</i>   | Agarico  | Basidio | 45 | 18 | 26 | 72 | 161 | GCA_003315915.1 | USDA-ARS                                                                                                                                  |
| 740 | <i>Thelonectria rubi</i>         | Sordario | Asco    | 42 | 58 | 29 | 31 | 160 | GCA_013420875.1 | Wageningen University                                                                                                                     |
| 741 | <i>Botryotinia calthae</i>       | Leotio   | Asco    | 46 | 54 | 20 | 40 | 160 | GCA_004379285.1 | Wageningen University                                                                                                                     |
| 742 | <i>Botryotinia narcissicola</i>  | Leotio   | Asco    | 45 | 56 | 18 | 41 | 160 | GCA_004786225.1 | Manaaki Whenua Landcare<br>Research                                                                                                       |
| 743 | <i>Neobulgaria alba</i>          | Leotio   | Asco    | 48 | 58 | 30 | 24 | 160 | GCA_003988965.1 | Technische Universitat<br>Munchen - WZW                                                                                                   |
| 744 | <i>Armillaria ostoyae</i>        | Agarico  | Basidio | 39 | 42 | 22 | 57 | 160 | GCA_900157425.1 | Banaras Hindu University                                                                                                                  |
| 745 | <i>Pseudocercospora cruenta</i>  | Dothideo | Asco    | 41 | 49 | 21 | 48 | 159 | GCA_013365205.1 | DOE Joint Genome Institute                                                                                                                |
| 746 | <i>Aspergillus alliaceus</i>     | Eurotio  | Asco    | 43 | 61 | 22 | 33 | 159 | GCA_009176365.1 | University of Montana                                                                                                                     |
| 747 | <i>Raffaelea albimanens</i>      | Sordario | Asco    | 50 | 34 | 34 | 41 | 159 | GCA_002778245.1 | Uppsala University                                                                                                                        |
| 748 | <i>Aureobasidium sp. FSWF8-4</i> | Dothideo | Asco    | 44 | 58 | 24 | 33 | 159 | GCA_001914275.1 | DOE Joint Genome Institute                                                                                                                |
| 749 | <i>Clathrospora elyngae</i>      | Dothideo | Asco    | 46 | 38 | 35 | 40 | 159 | GCA_010015635.1 | University of Pretoria                                                                                                                    |
| 750 | <i>Graphilbum fragrans</i>       | Sordario | Asco    | 49 | 40 | 32 | 37 | 158 | GCA_001513895.1 | Northwest A&F University                                                                                                                  |
| 751 | <i>Cytospora leucostoma</i>      | Sordario | Asco    | 40 | 60 | 24 | 34 | 158 | GCA_003795295.1 | RIKEN Center for Life Science<br>Technologies, Division of<br>Genomic Technologies                                                        |
| 752 | <i>Penicillium citrinum</i>      | Eurotio  | Asco    | 42 | 62 | 20 | 34 | 158 | GCA_001950535.1 | USDA-ARS                                                                                                                                  |
| 753 | <i>Corinectria fuckeliana</i>    | Sordario | Asco    | 44 | 61 | 22 | 31 | 158 | GCA_003385255.1 |                                                                                                                                           |

|     |                                     |          |         |    |    |    |    |     |                 |                                                               |
|-----|-------------------------------------|----------|---------|----|----|----|----|-----|-----------------|---------------------------------------------------------------|
| 754 | <i>Botryotinia convoluta</i>        | Leotio   | Asco    | 46 | 52 | 19 | 41 | 158 | GCA_004786275.1 | Wageningen University                                         |
| 755 | <i>Venustampulla echinocandica</i>  | Leotio   | Asco    | 48 | 32 | 39 | 39 | 158 | GCA_003357145.1 | The University of Texas Health<br>Science Center at Houston   |
| 756 | <i>Punctularia strigosozonata</i>   | Agarico  | Basidio | 36 | 44 | 24 | 54 | 158 | GCA_000264995.1 | JGI                                                           |
| 757 | <i>Crucibulum laeve</i>             | Agarico  | Basidio | 54 | 19 | 22 | 63 | 158 | GCA_004379715.1 | DOE Joint Genome Institute                                    |
| 758 | <i>Leucoagaricus leucothites</i>    | Agarico  | Basidio | 50 | 20 | 20 | 68 | 158 | GCA_013368445.1 | Lund University                                               |
| 759 | <i>Pleurotus citrinopileatus</i>    | Agarico  | Basidio | 46 | 24 | 20 | 68 | 158 | GCA_003314595.1 | Kunming University of Science<br>and Technology               |
| 760 | <i>Aspergillus unguis</i>           | Eurotio  | Asco    | 52 | 55 | 20 | 30 | 157 | GCA_003324175.1 | CSIR-NIIST                                                    |
| 761 | <i>Raffaelea ambrosiae</i>          | Sordario | Asco    | 47 | 36 | 34 | 40 | 157 | GCA_002778195.1 | University of Montana                                         |
| 762 | <i>Aspergillus incahuasiensis</i>   | Eurotio  | Asco    | 44 | 60 | 29 | 24 | 157 | GCA_003719405.1 | National Center For Agricultural<br>Utilization Research      |
| 763 | <i>Sporothrix pallida</i>           | Sordario | Asco    | 48 | 38 | 38 | 33 | 157 | GCA_000710705.2 | University of Messina                                         |
| 764 | <i>Aspergillus aculeatinus</i>      | Eurotio  | Asco    | 40 | 64 | 21 | 32 | 157 | GCA_003184765.1 | DOE Joint Genome Institute                                    |
| 765 | <i>Lachnellula willkommii</i>       | Leotio   | Asco    | 50 | 46 | 12 | 49 | 157 | GCA_007825375.1 | Canadian Food Inspection<br>Agency (CFIA)                     |
| 766 | <i>Penicillium steckii</i>          | Eurotio  | Asco    | 42 | 62 | 18 | 35 | 157 | GCA_002072375.1 | Chalmers University of<br>Technology                          |
| 767 | <i>Aspergillus tubingensis</i>      | Eurotio  | Asco    | 42 | 66 | 16 | 33 | 157 | GCA_010614855.1 | Hankyong National University                                  |
| 768 | <i>Elsinoe ampelina</i>             | Dothideo | Asco    | 42 | 54 | 30 | 31 | 157 | GCA_005959805.1 | Northwest A&F University                                      |
| 769 | <i>Armillaria solidipes</i>         | Agarico  | Basidio | 38 | 40 | 24 | 55 | 157 | GCA_002307675.1 | DOE Joint Genome Institute                                    |
| 770 | <i>Aspergillus avenaceus</i>        | Eurotio  | Asco    | 40 | 66 | 20 | 30 | 156 | GCA_009193465.1 | DOE Joint Genome Institute                                    |
| 771 | <i>Xenoacremonium recifei</i>       | Sordario | Asco    | 53 | 52 | 22 | 29 | 156 | GCA_012184525.1 | Belgian Coordinated Collection<br>of Microorganisms, BCCM     |
| 772 | <i>Pyrenopolyporus hunteri</i>      | Sordario | Asco    | 47 | 35 | 34 | 40 | 156 | GCA_902806595.1 | CEBITEC                                                       |
| 773 | <i>Aspergillus piperis</i>          | Eurotio  | Asco    | 42 | 64 | 14 | 36 | 156 | GCA_003184755.1 | DOE Joint Genome Institute                                    |
| 774 | <i>Fusarium verrucosum</i>          | Sordario | Asco    | 44 | 41 | 35 | 36 | 156 | GCA_013623715.1 | US Department of Agriculture,<br>Agriculture Research Service |
| 775 | <i>Rhizoctonia solani</i>           | Agarico  | Basidio | 39 | 58 | 16 | 43 | 156 | GCA_001899475.2 | Universiti Kebangsaan Malaysia                                |
| 776 | <i>Aspergillus viridinutans</i>     | Eurotio  | Asco    | 44 | 60 | 26 | 24 | 154 | GCA_004368095.1 | University of Melbourne                                       |
| 777 | <i>Cylindrobasidium torrendii</i>   | Agarico  | Basidio | 44 | 52 | 25 | 33 | 154 | GCA_000934385.1 | DOE Joint Genome Institute                                    |
| 778 | <i>Aspergillus luchuensis</i>       | Eurotio  | Asco    | 41 | 64 | 14 | 35 | 154 | GCA_001890685.1 | DOE Joint Genome Institute                                    |
| 779 | <i>Lachnellula arida</i>            | Leotio   | Asco    | 49 | 42 | 14 | 48 | 153 | GCA_007821475.1 | Canadian Food Inspection<br>Agency (CFIA)                     |
| 780 | <i>Pezoloma ericae</i>              | Leotio   | Asco    | 40 | 55 | 22 | 36 | 153 | GCA_002865625.1 | DOE Joint Genome Institute                                    |
| 781 | <i>Aspergillus brunneoviolaceus</i> | Eurotio  | Asco    | 38 | 64 | 18 | 33 | 153 | GCA_003184695.1 | DOE Joint Genome Institute                                    |
| 782 | <i>Fusarium xyrophilum</i>          | Sordario | Asco    | 34 | 50 | 35 | 34 | 153 | GCA_008711595.1 | US Department of Agriculture,<br>Agriculture Research Service |
| 783 | <i>Trametes polyzona</i>            | Agarico  | Basidio | 42 | 26 | 27 | 58 | 153 | GCA_001939255.1 | Universidad Nacional Agraria La<br>Molina,                    |
| 784 | <i>Aspergillus hiratsukae</i>       | Eurotio  | Asco    | 43 | 55 | 26 | 28 | 152 | GCA_014281905.1 | UNICAMP                                                       |
| 785 | <i>Venturia oleaginea</i>           | Dothideo | Asco    | 43 | 48 | 14 | 47 | 152 | GCA_013176395.1 | FUJIAN AGRICULTURE AND<br>FORESTRY UNIVERSITY                 |

|     |                                       |          |         |    |    |    |    |     |                 |                                                                                    |
|-----|---------------------------------------|----------|---------|----|----|----|----|-----|-----------------|------------------------------------------------------------------------------------|
| 786 | <i>Fusarium sp. KOD 1611</i>          | Sordario | Asco    | 34 | 49 | 35 | 34 | 152 | GCA_013624395.1 | US Department of Agriculture,<br>Agriculture Research Service                      |
| 787 | <i>Penicillium rolfsii</i>            | Eurotio  | Asco    | 44 | 59 | 27 | 22 | 152 | GCA_011392555.1 | Embrapa Agroenergia                                                                |
| 788 | <i>Trametes sp. AH28-2</i>            | Agarico  | Basidio | 44 | 24 | 20 | 64 | 152 | GCA_001304625.1 | Anhui University                                                                   |
| 789 | <i>Phanerochaete carnosae</i>         | Agarico  | Basidio | 53 | 16 | 21 | 62 | 152 | GCA_000300595.1 | DOE Joint Genome Institute                                                         |
| 790 | <i>Aspergillus olivimuriae</i>        | Eurotio  | Asco    | 42 | 53 | 32 | 24 | 151 | GCA_003719415.1 | National Center For Agricultural<br>Utilization Research                           |
| 791 | <i>Aspergillus oerlinghausenensis</i> | Eurotio  | Asco    | 42 | 58 | 27 | 24 | 151 | GCA_014250555.1 | Vanderbilt University                                                              |
| 792 | <i>Esteya vermicola</i>               | Sordario | Asco    | 59 | 25 | 32 | 35 | 151 | GCA_002778215.1 | University of Montana                                                              |
| 793 | <i>Lachnellula cervina</i>            | Leotio   | Asco    | 46 | 46 | 15 | 44 | 151 | GCA_007825325.1 | Canadian Food Inspection<br>Agency (CFIA)                                          |
| 794 | <i>Aspergillus costaricensis</i>      | Eurotio  | Asco    | 40 | 64 | 14 | 33 | 151 | GCA_003184835.1 | DOE Joint Genome Institute                                                         |
| 795 | <i>Aspergillus niger</i>              | Eurotio  | Asco    | 40 | 63 | 14 | 34 | 151 | GCA_011316255.1 | South China Agricultural<br>University                                             |
| 796 | <i>Hericium coralloides</i>           | Agarico  | Basidio | 54 | 21 | 24 | 52 | 151 | GCA_003675405.1 | Tibet Vocational Technical<br>College                                              |
| 797 | <i>Agrocybe pediades</i>              | Agarico  | Basidio | 44 | 17 | 24 | 66 | 151 | GCA_013053245.1 | Lund University                                                                    |
| 798 | <i>Pleurotus ostreatus</i>            | Agarico  | Basidio | 54 | 21 | 18 | 58 | 151 | GCA_003313235.2 | Chinese Academy of<br>Agricultural Sciences                                        |
| 799 | <i>Pallidocercospora crystallina</i>  | Dothideo | Asco    | 41 | 46 | 15 | 48 | 150 | GCA_003666085.1 | Xijing Hospital, Fourth Military<br>Medical University                             |
| 800 | <i>Passalora fulva</i>                | Dothideo | Asco    | 38 | 52 | 20 | 40 | 150 | GCA_000301015.1 | Wageningen UR (University &<br>Research centre)                                    |
| 801 | <i>Magnaportheiopsis poae</i>         | Sordario | Asco    | 48 | 33 | 30 | 39 | 150 | GCA_000193285.1 | Broad Institute                                                                    |
| 802 | <i>Aspergillus turcosus</i>           | Eurotio  | Asco    | 42 | 58 | 25 | 25 | 150 | GCA_002234965.2 | University of Montreal                                                             |
| 803 | <i>Penicillium fuscoglaucum</i>       | Eurotio  | Asco    | 46 | 50 | 18 | 36 | 150 | GCA_000576735.1 | INRA-LIPM                                                                          |
| 804 | <i>Coniella lustricola</i>            | Sordario | Asco    | 38 | 60 | 26 | 26 | 150 | GCA_003019895.1 | DOE Joint Genome Institute                                                         |
| 805 | <i>Penicillium sp. MA 6036</i>        | Eurotio  | Asco    | 46 | 49 | 17 | 38 | 150 | GCA_003138045.1 | University of Natural Resources<br>and Life Sciences, Vienna                       |
| 806 | <i>Aspergillus fijiensis</i>          | Eurotio  | Asco    | 39 | 62 | 18 | 31 | 150 | GCA_003184825.1 | DOE Joint Genome Institute                                                         |
| 807 | <i>Aspergillus uvarum</i>             | Eurotio  | Asco    | 38 | 62 | 18 | 32 | 150 | GCA_003184745.1 | DOE Joint Genome Institute                                                         |
| 808 | <i>Crepidotus sp. BD-2015</i>         | Agarico  | Basidio | 36 | 28 | 24 | 62 | 150 | GCA_001179765.1 | Royal Botanic Gardens, Kew                                                         |
| 809 | <i>Aspergillus awamori</i>            | Eurotio  | Asco    | 40 | 64 | 14 | 32 | 150 | GCA_001599415.1 | RIKEN Center for Life Science<br>Technologies, Division of<br>Genomic Technologies |
| 810 | <i>Trametes hirsuta</i>               | Agarico  | Basidio | 42 | 22 | 24 | 62 | 150 | GCA_001302255.2 | A.N. Bach Institute of<br>Biochemistry                                             |
| 811 | <i>Lepista sordida</i>                | Agarico  | Basidio | 44 | 22 | 22 | 62 | 150 | GCA_900168675.1 | UNIVERSITY OF BRISTOL                                                              |
| 812 | <i>Cercospora sesami</i>              | Dothideo | Asco    | 42 | 38 | 27 | 42 | 149 | GCA_013365235.1 | Banaras Hindu University                                                           |
| 813 | <i>Penicillium sp. SPG-F15</i>        | Eurotio  | Asco    | 46 | 46 | 17 | 40 | 149 | GCA_003800485.1 | Texas A&M University - Corpus<br>Christi                                           |
| 814 | <i>Aspergillus japonicus</i>          | Eurotio  | Asco    | 39 | 62 | 16 | 32 | 149 | GCA_003184785.1 | DOE Joint Genome Institute                                                         |
| 815 | <i>Aspergillus indologenus</i>        | Eurotio  | Asco    | 38 | 63 | 18 | 30 | 149 | GCA_003184685.1 | DOE Joint Genome Institute                                                         |
| 816 | <i>Aspergillus violaceofuscus</i>     | Eurotio  | Asco    | 40 | 60 | 16 | 33 | 149 | GCA_003184705.1 | DOE Joint Genome Institute                                                         |

|     |                                       |          |         |    |    |    |    |     |                 |                                                                   |
|-----|---------------------------------------|----------|---------|----|----|----|----|-----|-----------------|-------------------------------------------------------------------|
| 817 | <i>Penicillium expansum</i>           | Eurotio  | Asco    | 51 | 48 | 16 | 34 | 149 | GCA_004302965.1 | ARS                                                               |
| 818 | <i>Aspergillus vadensis</i>           | Eurotio  | Asco    | 38 | 64 | 14 | 33 | 149 | GCA_003184925.1 | DOE Joint Genome Institute                                        |
| 819 | <i>Aureobasidium subglaciale</i>      | Dothideo | Asco    | 44 | 53 | 24 | 28 | 149 | GCA_000721755.1 | JGI                                                               |
| 820 | <i>Dothidotthia symphoricarpi</i>     | Dothideo | Asco    | 42 | 60 | 16 | 31 | 149 | GCA_010015815.1 | DOE Joint Genome Institute                                        |
| 821 | <i>Aspergillus floridensis</i>        | Eurotio  | Asco    | 41 | 60 | 16 | 32 | 149 | GCA_012184565.1 | Belgian Coordinated Collection of Microorganisms, BCCM            |
| 822 | <i>Aureobasidium melanogenum</i>      | Dothideo | Asco    | 42 | 45 | 24 | 38 | 149 | GCA_002156615.1 | Ocean University of China                                         |
| 823 | <i>Thermothielavioides terrestris</i> | Sordario | Asco    | 45 | 32 | 36 | 36 | 149 | GCA_900343105.1 | CHALMERS UNIVERSITY OF TECHNOLOGY                                 |
| 824 | <i>Armillaria borealis</i>            | Agarico  | Basidio | 40 | 31 | 22 | 56 | 149 | GCA_013427175.2 | Genome Research and Education Center, Siberian Federal University |
| 825 | <i>Coniella vitis</i>                 | Sordario | Asco    | 35 | 60 | 24 | 29 | 148 | GCA_011317545.1 | qingdao agricultural university                                   |
| 826 | <i>Elsinoe australis</i>              | Dothideo | Asco    | 38 | 58 | 24 | 28 | 148 | GCA_003013795.1 | Nanjing Forestry University                                       |
| 827 | <i>Aspergillus neoniger</i>           | Eurotio  | Asco    | 38 | 60 | 14 | 35 | 147 | GCA_003184625.1 | DOE Joint Genome Institute                                        |
| 828 | <i>Monilinia laxa</i>                 | Leotio   | Asco    | 41 | 50 | 20 | 36 | 147 | GCA_009299455.1 | UniBa - Univpm                                                    |
| 829 | <i>Galerina marginata</i>             | Agarico  | Basidio | 42 | 26 | 27 | 52 | 147 | GCA_000697645.1 | DOE Joint Genome Institute                                        |
| 830 | <i>Rhizodiscina lignyota</i>          | Dothideo | Asco    | 34 | 46 | 24 | 42 | 146 | GCA_010015805.1 | DOE Joint Genome Institute                                        |
| 831 | <i>Fusarium aywerte</i>               | Sordario | Asco    | 36 | 46 | 34 | 30 | 146 | GCA_013186375.1 | US Department of Agriculture, Agriculture Research Service        |
| 832 | <i>Botrytis porri</i>                 | Leotio   | Asco    | 42 | 52 | 16 | 36 | 146 | GCA_004786265.1 | Wageningen University                                             |
| 833 | <i>Viridothelium virens</i>           | Dothideo | Asco    | 36 | 39 | 32 | 39 | 146 | GCA_010094025.1 | DOE Joint Genome Institute                                        |
| 834 | <i>Morchella crassipes</i>            | Pezizo   | Asco    | 44 | 56 | 22 | 24 | 146 | GCA_009192285.1 | Huazhong Agricultural University                                  |
| 835 | <i>Aspergillus eucalypticola</i>      | Eurotio  | Asco    | 38 | 60 | 14 | 33 | 145 | GCA_003184535.1 | DOE Joint Genome Institute                                        |
| 836 | <i>Fusarium domesticum</i>            | Sordario | Asco    | 43 | 66 | 16 | 20 | 145 | GCA_013618395.1 | US Department of Agriculture, Agriculture Research Service        |
| 837 | <i>Marssonina brunnea</i>             | Leotio   | Asco    | 41 | 46 | 22 | 36 | 145 | GCA_011750725.1 | Nanjing Forestry University                                       |
| 838 | <i>Morchella septimelata</i>          | Pezizo   | Asco    | 42 | 54 | 22 | 27 | 145 | GCA_003062385.1 | Biotechnology and Nuclear Technology Research Institute           |
| 839 | <i>Friedmanniomyces endolithicus</i>  | Dothideo | Asco    | 40 | 24 | 46 | 34 | 144 | GCA_005059855.1 | University of California, Riverside                               |
| 840 | <i>Penicillium sp. str. #12</i>       | Eurotio  | Asco    | 46 | 48 | 18 | 32 | 144 | GCA_013138035.1 | None                                                              |
| 841 | <i>Microthyrium microscopicum</i>     | Dothideo | Asco    | 38 | 33 | 24 | 49 | 144 | GCA_010405405.1 | DOE Joint Genome Institute                                        |
| 842 | <i>Penicillium sp. BW_12</i>          | Eurotio  | Asco    | 46 | 48 | 18 | 32 | 144 | GCA_008931925.1 | Tufts University                                                  |
| 843 | <i>Penicillium antarcticum</i>        | Eurotio  | Asco    | 44 | 54 | 16 | 30 | 144 | GCA_002072345.1 | Chalmers University of Technology                                 |
| 844 | <i>Aspergillus wentii</i>             | Eurotio  | Asco    | 40 | 50 | 16 | 38 | 144 | GCA_001890725.1 | DOE Joint Genome Institute                                        |
| 845 | <i>Agrocybe aegerita</i>              | Agarico  | Basidio | 52 | 18 | 22 | 52 | 144 | GCA_902728275.1 | Integrative Pilzforschung                                         |
| 846 | <i>Monilinia fructicola</i>           | Leotio   | Asco    | 42 | 45 | 18 | 38 | 143 | GCA_008692225.1 | UniBa - Univpm                                                    |
| 847 | <i>Chondrostereum purpureum</i>       | Agarico  | Basidio | 35 | 23 | 16 | 69 | 143 | GCA_004354395.1 | Internationales Hochschulinstitut Zittau                          |
| 848 | <i>Raffaelea sp. RL272</i>            | Sordario | Asco    | 51 | 43 | 16 | 32 | 142 | GCA_002777955.1 | University of Montana                                             |

|     |                                          |          |         |    |    |    |    |     |                 |                                                                                                                     |
|-----|------------------------------------------|----------|---------|----|----|----|----|-----|-----------------|---------------------------------------------------------------------------------------------------------------------|
| 849 | <i>Schizophyllum commune</i>             | Agarico  | Basidio | 40 | 40 | 26 | 36 | 142 | GCA_001599475.1 | RIKEN Center for Life Science Technologies, Division of Genomic Technologies                                        |
| 850 | <i>Scytalidium lignicola</i>             | Leotio   | Asco    | 40 | 30 | 30 | 42 | 142 | GCA_002812745.2 | IHI Zittau / TU Dresden                                                                                             |
| 851 | <i>Aspergillus neoellipticus</i>         | Eurotio  | Asco    | 39 | 58 | 25 | 20 | 142 | GCA_003116565.1 | personal                                                                                                            |
| 852 | <i>Mycosphaerelloides madeirae</i>       | Dothideo | Asco    | 42 | 38 | 16 | 46 | 142 | GCA_002785995.1 | Northwest A&F University                                                                                            |
| 853 | <i>Aspergillus homomorphus</i>           | Eurotio  | Asco    | 39 | 59 | 16 | 28 | 142 | GCA_003184865.1 | DOE Joint Genome Institute                                                                                          |
| 854 | <i>Aspergillus sclerotiiicarbonarius</i> | Eurotio  | Asco    | 38 | 57 | 12 | 35 | 142 | GCA_003184635.1 | DOE Joint Genome Institute                                                                                          |
| 855 | <i>Ciborinia camelliae</i>               | Leotio   | Asco    | 42 | 48 | 14 | 38 | 142 | GCA_001247705.1 | Massey University                                                                                                   |
| 856 | <i>Monilinia polystroma</i>              | Leotio   | Asco    | 40 | 51 | 17 | 34 | 142 | GCA_002909645.1 | United States Department of Agriculture                                                                             |
| 857 | <i>Gymnopus androsaceus</i>              | Agarico  | Basidio | 34 | 27 | 26 | 55 | 142 | GCA_009733575.1 | DOE Joint Genome Institute                                                                                          |
| 858 | <i>Aspergillus persii</i>                | Eurotio  | Asco    | 42 | 44 | 20 | 35 | 141 | GCA_002215965.1 | National Institute of Biological Resources                                                                          |
| 859 | <i>Aspergillus fumigatus</i>             | Eurotio  | Asco    | 40 | 57 | 25 | 19 | 141 | GCA_005768625.2 | Nanyang Technological University                                                                                    |
| 860 | <i>Aspergillus carbonarius</i>           | Eurotio  | Asco    | 36 | 58 | 12 | 35 | 141 | GCA_001990825.1 | DOE Joint Genome Institute                                                                                          |
| 861 | <i>Aureobasidium sp. P6</i>              | Dothideo | Asco    | 37 | 48 | 26 | 30 | 141 | GCA_003992365.1 | Ocean University of China                                                                                           |
| 862 | <i>Serendipita vermifera</i>             | Agarico  | Basidio | 50 | 23 | 34 | 34 | 141 | GCA_003073295.1 | DOE Joint Genome Institute                                                                                          |
| 863 | <i>Penicillium sp. SPG-F1</i>            | Eurotio  | Asco    | 46 | 46 | 18 | 30 | 140 | GCA_003800495.1 | Texas A&M University Corpus Christi                                                                                 |
| 864 | <i>Aspergillus sclerotioniger</i>        | Eurotio  | Asco    | 38 | 56 | 12 | 34 | 140 | GCA_003184525.1 | DOE Joint Genome Institute                                                                                          |
| 865 | <i>Coprinopsis cinerea</i>               | Agarico  | Basidio | 46 | 9  | 33 | 52 | 140 | GCA_000182895.1 | Broad Institute                                                                                                     |
| 866 | <i>Lignosus rhinocerotis</i>             | Agarico  | Basidio | 40 | 20 | 20 | 60 | 140 | GCA_000743315.1 | University of Malaya                                                                                                |
| 867 | <i>Paradendryphiella salina</i>          | Dothideo | Asco    | 40 | 40 | 25 | 35 | 140 | GCA_900634815.1 | DTU Bioengineering                                                                                                  |
| 868 | <i>Patellaria atrata</i>                 | Dothideo | Asco    | 50 | 23 | 29 | 38 | 140 | GCA_010093705.1 | DOE Joint Genome Institute                                                                                          |
| 869 | <i>Pleurotus tuoliensis</i>              | Agarico  | Basidio | 48 | 26 | 14 | 52 | 140 | GCA_003243755.1 | Northeast Normal University                                                                                         |
| 870 | <i>Armillaria fuscipes</i>               | Agarico  | Basidio | 40 | 28 | 18 | 54 | 140 | GCA_001679825.1 | Forestry and Agricultural Biotechnology Institute, University of Pretoria                                           |
| 871 | <i>Penicillium sp. BW_162_3FA</i>        | Eurotio  | Asco    | 44 | 47 | 16 | 32 | 139 | GCA_008931945.1 | Tufts University                                                                                                    |
| 872 | <i>Venturia pyrina</i>                   | Dothideo | Asco    | 33 | 48 | 14 | 44 | 139 | GCA_000738655.1 | La Trobe University                                                                                                 |
| 873 | <i>Neurospora pannonica</i>              | Sordario | Asco    | 43 | 25 | 37 | 34 | 139 | GCA_009805235.1 | Department of Botany, University of California, Berkeley                                                            |
| 874 | <i>Decorospora gaudefroyi</i>            | Dothideo | Asco    | 44 | 27 | 32 | 36 | 139 | GCA_010015605.1 | DOE Joint Genome Institute                                                                                          |
| 875 | <i>Pleurotus ostreatoroseus</i>          | Agarico  | Basidio | 43 | 18 | 22 | 56 | 139 | GCA_005298045.1 | Amazonian macromicets: knowing their diversity and evaluating their biotechnological potential in a sustainable way |
| 876 | <i>Irpex lacteus</i>                     | Agarico  | Basidio | 46 | 23 | 22 | 48 | 139 | GCA_001986395.2 | Anhui university                                                                                                    |
| 877 | <i>Penicillium bifforme</i>              | Eurotio  | Asco    | 43 | 47 | 16 | 32 | 138 | GCA_000577785.1 | INRA-LIPM                                                                                                           |
| 878 | <i>Venturia aucupariae</i>               | Dothideo | Asco    | 33 | 49 | 14 | 42 | 138 | GCA_003693225.1 | INRA                                                                                                                |

|     |                                      |          |         |    |    |    |    |     |                 |                                                                              |
|-----|--------------------------------------|----------|---------|----|----|----|----|-----|-----------------|------------------------------------------------------------------------------|
| 879 | <i>Neurospora sp. FGSC 6877</i>      | Sordario | Asco    | 41 | 24 | 36 | 37 | 138 | GCA_009805295.1 | University of California, Berkeley                                           |
| 880 | <i>Morchella sextelata</i>           | Pezizo   | Asco    | 41 | 54 | 19 | 24 | 138 | GCA_009741755.1 | Inner Mongolia International Mongolian Hospital                              |
| 881 | <i>Morchella importuna</i>           | Pezizo   | Asco    | 42 | 52 | 20 | 24 | 138 | GCA_003444635.1 | Huazhong Agricultural University                                             |
| 882 | <i>Penicillium solitum</i>           | Eurotio  | Asco    | 43 | 48 | 18 | 28 | 137 | GCA_000952775.2 | JCVI                                                                         |
| 883 | <i>Monilinia aucupariae</i>          | Leotio   | Asco    | 40 | 47 | 18 | 32 | 137 | GCA_002162555.1 | University of Toronto Mississauga                                            |
| 884 | <i>Lyophyllum decastes</i>           | Agarico  | Basidio | 40 | 22 | 16 | 59 | 137 | GCA_001950495.1 | RIKEN Center for Life Science Technologies, Division of Genomic Technologies |
| 885 | <i>Penicillium flavigenum</i>        | Eurotio  | Asco    | 40 | 46 | 18 | 32 | 136 | GCA_002072365.1 | Chalmers University of Technology                                            |
| 886 | <i>Cercospora cf. sigesbeckiae</i>   | Dothideo | Asco    | 39 | 35 | 22 | 40 | 136 | GCA_005356805.1 | University of Arkansas                                                       |
| 887 | <i>Cercospora beticola</i>           | Dothideo | Asco    | 38 | 36 | 22 | 40 | 136 | GCA_003370525.1 | University of Southern Queensland                                            |
| 888 | <i>Hypoxylon fragiforme</i>          | Sordario | Asco    | 40 | 31 | 31 | 34 | 136 | GCA_902806515.1 | CEBITEC                                                                      |
| 889 | <i>Flammulina velutipes</i>          | Agarico  | Basidio | 43 | 24 | 25 | 44 | 136 | GCA_011800155.1 | Fujian Agriculture and Forestry University                                   |
| 890 | <i>Aspergillus ellipticus</i>        | Eurotio  | Asco    | 36 | 58 | 14 | 28 | 136 | GCA_003184645.1 | DOE Joint Genome Institute                                                   |
| 891 | <i>Thermothelomyces thermophilus</i> | Sordario | Asco    | 40 | 32 | 36 | 28 | 136 | GCA_000226095.1 | DOE Joint Genome Institute                                                   |
| 892 | <i>Lentinus polychrous</i>           | Agarico  | Basidio | 40 | 20 | 22 | 54 | 136 | GCA_000787475.1 | none                                                                         |
| 893 | <i>Morchella conica</i>              | Pezizo   | Asco    | 40 | 52 | 20 | 24 | 136 | GCA_003790465.1 | DOE Joint Genome Institute                                                   |
| 894 | <i>Ascobolus immersus</i>            | Pezizo   | Asco    | 50 | 12 | 38 | 36 | 136 | GCA_003788565.2 | DOE Joint Genome Institute                                                   |
| 895 | <i>Gymnopilus dilepis</i>            | Agarico  | Basidio | 42 | 12 | 20 | 62 | 136 | GCA_002938385.1 | Ohio State University                                                        |
| 896 | <i>Pleurotus eryngii</i>             | Agarico  | Basidio | 48 | 22 | 14 | 52 | 136 | GCA_001717165.1 | Shanghai Academy of Agricultural Sciences                                    |
| 897 | <i>Venturia inaequalis</i>           | Dothideo | Asco    | 33 | 46 | 12 | 44 | 135 | GCA_003689225.1 | INRA                                                                         |
| 898 | <i>Trametes sanguinea</i>            | Agarico  | Basidio | 42 | 18 | 22 | 53 | 135 | GCA_008973685.1 | School of Bioscience and Technology                                          |
| 899 | <i>Lachnellula subtilissima</i>      | Leotio   | Asco    | 41 | 42 | 16 | 36 | 135 | GCA_007821545.1 | Canadian Food Inspection Agency (CFIA)                                       |
| 900 | <i>Sclerotium cepivorum</i>          | 0        | Asco    | 39 | 44 | 18 | 34 | 135 | GCA_002162485.1 | University of Toronto Mississauga                                            |
| 901 | <i>Myriosclerotinia duriaeana</i>    | Leotio   | Asco    | 40 | 41 | 18 | 36 | 135 | GCA_002162615.1 | University of Toronto Mississauga                                            |
| 902 | <i>Stropharia rugosoannulata</i>     | Agarico  | Basidio | 44 | 12 | 17 | 62 | 135 | GCA_003314255.1 | Kunming University of Science and Technology                                 |
| 903 | <i>Leucoagaricus sp. SymC.cos</i>    | Agarico  | Basidio | 37 | 15 | 21 | 62 | 135 | GCA_001563735.1 | BGI                                                                          |
| 904 | <i>Phlebia tremellosa</i>            | Agarico  | Basidio | 44 | 11 | 23 | 56 | 134 | GCA_011032875.1 | Ningxia University                                                           |
| 905 | <i>Pleurotus tuber-regium</i>        | Agarico  | Basidio | 45 | 14 | 14 | 61 | 134 | GCA_014058305.1 | Huazhong Agricultural University                                             |
| 906 | <i>Talaromyces islandicus</i>        | Eurotio  | Asco    | 32 | 46 | 24 | 31 | 133 | GCA_000985935.1 | CEBITEC                                                                      |

|     |                                    |           |           |    |    |    |    |     |                 |                                                                                                                                                   |
|-----|------------------------------------|-----------|-----------|----|----|----|----|-----|-----------------|---------------------------------------------------------------------------------------------------------------------------------------------------|
| 907 | <i>Cercospora kikuchii</i>         | Dothideo  | Asco      | 38 | 34 | 22 | 39 | 133 | GCA_009193115.1 | School of Agriculture of the University of Buenos Aires                                                                                           |
| 908 | <i>Cercospora cf. flagellaris</i>  | Dothideo  | Asco      | 39 | 34 | 22 | 38 | 133 | GCA_005356885.1 | University of Arkansas                                                                                                                            |
| 909 | <i>Venturia nashicola</i>          | Dothideo  | Asco      | 30 | 48 | 15 | 40 | 133 | GCA_004522665.1 | POSTECH                                                                                                                                           |
| 910 | <i>Penicillium polonicum</i>       | Eurotio   | Asco      | 42 | 44 | 17 | 30 | 133 | GCA_013466175.1 | National Institute of Agricultural Sciences, RDA                                                                                                  |
| 911 | <i>Aspergillus sclerotiorum</i>    | Eurotio   | Asco      | 41 | 42 | 20 | 30 | 133 | GCA_000530345.1 | SVSB                                                                                                                                              |
| 912 | <i>Ciboria shiraiana</i>           | Leotio    | Asco      | 37 | 46 | 20 | 30 | 133 | GCA_008122225.1 | Southwest University                                                                                                                              |
| 913 | <i>Aspergillus ibericus</i>        | Eurotio   | Asco      | 34 | 56 | 11 | 32 | 133 | GCA_003184845.1 | DOE Joint Genome Institute                                                                                                                        |
| 914 | <i>Myriosclerotinia scirpicola</i> | Leotio    | Asco      | 39 | 41 | 16 | 37 | 133 | GCA_002162505.1 | University of Toronto                                                                                                                             |
| 915 | <i>Pholiota adiposa</i>            | Agarico   | Basidio   | 46 | 11 | 20 | 56 | 133 | GCA_009935795.1 | Mississauga<br>Dezhou University                                                                                                                  |
| 916 | <i>Trichoderma virens</i>          | Sordario  | Asco      | 42 | 28 | 36 | 26 | 132 | GCA_001835465.1 | Bhabha Atomic Research Centre                                                                                                                     |
| 917 | <i>Cercospora canescens</i>        | Dothideo  | Asco      | 37 | 36 | 19 | 40 | 132 | GCA_000347735.1 | Banaras Hindu University                                                                                                                          |
| 918 | <i>Cercospora nicotianae</i>       | Dothideo  | Asco      | 38 | 34 | 22 | 38 | 132 | GCA_002994015.1 | VIB                                                                                                                                               |
| 919 | <i>Penicillium camemberti</i>      | Eurotio   | Asco      | 40 | 46 | 16 | 30 | 132 | GCA_000513335.1 | INRA-LIPM                                                                                                                                         |
| 920 | <i>Lachnellula hyalina</i>         | Leotio    | Asco      | 41 | 43 | 12 | 36 | 132 | GCA_007821495.1 | Canadian Food Inspection Agency (CFIA)                                                                                                            |
| 921 | <i>Neurospora sp. FGSC 26632</i>   | Sordario  | Asco      | 38 | 24 | 36 | 34 | 132 | GCA_009804965.1 | University of California, Berkeley                                                                                                                |
| 922 | <i>Neurospora cerealis</i>         | Sordario  | Asco      | 41 | 22 | 33 | 36 | 132 | GCA_009806135.1 | University of California, Berkeley                                                                                                                |
| 923 | <i>Hypholoma sublateritium</i>     | Agarico   | Basidio   | 38 | 15 | 19 | 60 | 132 | GCA_000827495.1 | JGI                                                                                                                                               |
| 924 | <i>Cercospora citrullina</i>       | Dothideo  | Asco      | 38 | 34 | 22 | 37 | 131 | GCA_013365195.1 | Banaras Hindu University                                                                                                                          |
| 925 | <i>Penicillium vulpinum</i>        | Eurotio   | Asco      | 42 | 37 | 15 | 37 | 131 | GCA_002072255.1 | Chalmers University of Technology                                                                                                                 |
| 926 | <i>Neurospora sp. FGSC 26635</i>   | Sordario  | Asco      | 36 | 24 | 36 | 35 | 131 | GCA_009804975.1 | University of California, Berkeley                                                                                                                |
| 927 | <i>Sclerotinia sclerotiorum</i>    | Leotio    | Asco      | 36 | 45 | 20 | 30 | 131 | GCA_001857865.1 | Curtin University                                                                                                                                 |
| 928 | <i>Trametes cinnabarina</i>        | Agarico   | Basidio   | 40 | 16 | 24 | 51 | 131 | GCA_000787515.1 | Aalborg University                                                                                                                                |
| 929 | <i>Sordaria macrospora</i>         | Sordario  | Asco      | 40 | 20 | 34 | 36 | 130 | GCA_008692325.1 | Ruhr-University Bochum                                                                                                                            |
| 930 | <i>Ascocoryne sarcoides</i>        | Leotio    | Asco      | 44 | 45 | 20 | 21 | 130 | GCA_000328965.1 | Yale University                                                                                                                                   |
| 931 | <i>Tricholomella constricta</i>    | Agarico   | Basidio   | 36 | 26 | 16 | 52 | 130 | GCA_013368375.1 | Lund University                                                                                                                                   |
| 932 | <i>Ploettnerulaceae sp. D365</i>   | Leotio    | Asco      | 41 | 38 | 18 | 33 | 130 | GCA_003988805.1 | Manaaki Whenua Landcare Research                                                                                                                  |
| 933 | <i>Dactylella cylindrospora</i>    | Orbilio   | Asco      | 40 | 44 | 20 | 26 | 130 | GCA_012184295.1 | Laboratory for Conservation and Utilization of Bio-Resources and Key Laboratory for Microbial Diversity in Southwest China, Ministry of Education |
| 934 | <i>Coprinosopsis marcescibilis</i> | Agarico   | Basidio   | 38 | 7  | 27 | 58 | 130 | GCA_004369085.1 | DOE Joint Genome Institute                                                                                                                        |
| 935 | <i>Rhizophlyctis rosea</i>         | Chytridio | Chytridio | 39 | 25 | 42 | 24 | 130 | GCA_002214945.1 | DTU                                                                                                                                               |



|     |                                  |          |         |    |    |    |    |     |                 |                                                              |
|-----|----------------------------------|----------|---------|----|----|----|----|-----|-----------------|--------------------------------------------------------------|
| 936 | <i>Penicillium sp. BW_MB</i>     | Eurotio  | Asco    | 38 | 42 | 21 | 28 | 129 | GCA_008931935.1 | Tufts University                                             |
| 937 | <i>Penicillium freii</i>         | Eurotio  | Asco    | 37 | 44 | 20 | 28 | 129 | GCA_001513925.1 | Agriculture and Agri-Food<br>Canada                          |
| 938 | <i>Neurospora terricola</i>      | Sordario | Asco    | 39 | 22 | 34 | 34 | 129 | GCA_009805285.1 | University of California,<br>Berkeley                        |
| 939 | <i>Neurospora sp. CHS-2018c</i>  | Sordario | Asco    | 38 | 21 | 34 | 36 | 129 | GCA_009806235.1 | University of California,<br>Berkeley                        |
| 940 | <i>Trametes coccinea</i>         | Agarico  | Basidio | 38 | 18 | 23 | 50 | 129 | GCA_002092935.1 | DOE Joint Genome Institute                                   |
| 941 | <i>Cercospora berteroae</i>      | Dothideo | Asco    | 38 | 33 | 20 | 37 | 128 | GCA_002933655.1 | VIB                                                          |
| 942 | <i>Venturia asperata</i>         | Dothideo | Asco    | 30 | 44 | 14 | 40 | 128 | GCA_003689065.1 | INRA                                                         |
| 943 | <i>Neurospora sp. FGSC 26631</i> | Sordario | Asco    | 37 | 23 | 33 | 35 | 128 | GCA_009805105.1 | University of California,<br>Berkeley                        |
| 944 | <i>Venturia carpophila</i>       | Dothideo | Asco    | 35 | 44 | 11 | 38 | 128 | GCA_001990985.1 | USDA-ARS                                                     |
| 945 | <i>Neurospora sp. FGSC 26628</i> | Sordario | Asco    | 39 | 22 | 30 | 37 | 128 | GCA_009805345.1 | University of California,<br>Berkeley                        |
| 946 | <i>Neurospora sp. FGSC 26638</i> | Sordario | Asco    | 36 | 23 | 34 | 35 | 128 | GCA_009804825.1 | University of California,<br>Berkeley                        |
| 947 | <i>Ampelomyces quisqualis</i>    | Dothideo | Asco    | 39 | 34 | 25 | 30 | 128 | GCA_010094095.1 | DOE Joint Genome Institute                                   |
| 948 | <i>Sphaceloma murrayae</i>       | Dothideo | Asco    | 34 | 46 | 21 | 27 | 128 | GCA_002895985.1 | Nanjing Forestry University                                  |
| 949 | <i>Volvariella volvacea</i>      | Agarico  | Basidio | 45 | 17 | 26 | 40 | 128 | GCA_001691835.3 | Harvard University                                           |
| 950 | <i>Neurospora sp. FGSC 26637</i> | Sordario | Asco    | 37 | 21 | 34 | 35 | 127 | GCA_009804845.1 | University of California,<br>Berkeley                        |
| 951 | <i>Neurospora sp. FGSC 26636</i> | Sordario | Asco    | 37 | 23 | 32 | 35 | 127 | GCA_009804955.1 | University of California,<br>Berkeley                        |
| 952 | <i>Sclerotinia borealis</i>      | Leotio   | Asco    | 38 | 45 | 12 | 32 | 127 | GCA_000503235.1 | Centre Bioengineering RAS                                    |
| 953 | <i>Venturia effusa</i>           | Dothideo | Asco    | 32 | 42 | 13 | 40 | 127 | GCA_001901625.1 | USDA-ARS                                                     |
| 954 | <i>Sclerotinia glacialis</i>     | Leotio   | Asco    | 37 | 43 | 17 | 30 | 127 | GCA_002162575.1 | University of Toronto<br>Mississauga                         |
| 955 | <i>Neurospora sp. CHS-2018a</i>  | Sordario | Asco    | 38 | 20 | 34 | 35 | 127 | GCA_009802375.1 | University of California,<br>Berkeley                        |
| 956 | <i>Westerdykella ornata</i>      | Dothideo | Asco    | 40 | 21 | 33 | 33 | 127 | GCA_010094085.1 | DOE Joint Genome Institute                                   |
| 957 | <i>Arthrobotrys oligospora</i>   | Orbilio  | Asco    | 40 | 42 | 22 | 23 | 127 | GCA_004768765.1 | Academia Sinica                                              |
| 958 | <i>Hypsizygus marmoreus</i>      | Agarico  | Basidio | 40 | 17 | 14 | 56 | 127 | GCA_013433165.1 | Fujian Agriculture and Forestry<br>University                |
| 959 | <i>Tothia fuscella</i>           | Dothideo | Asco    | 34 | 36 | 14 | 42 | 126 | GCA_010583015.1 | DOE Joint Genome Institute                                   |
| 960 | <i>Penicillium sp. MA 6040</i>   | Eurotio  | Asco    | 38 | 42 | 16 | 30 | 126 | GCA_003138025.1 | University of Natural Resources<br>and Life Sciences, Vienna |
| 961 | <i>Penicillium chrysogenum</i>   | Eurotio  | Asco    | 38 | 42 | 16 | 30 | 126 | GCA_000710275.1 | Ruhr-Universitaet Bochum                                     |
| 962 | <i>Penicillium rubens</i>        | Eurotio  | Asco    | 38 | 42 | 16 | 30 | 126 | GCA_902636305.1 | IMPERIAL COLLEGE LONDON                                      |
| 963 | <i>Neurospora sp. LNF1-2</i>     | Sordario | Asco    | 35 | 23 | 33 | 35 | 126 | GCA_009805125.1 | University of California,<br>Berkeley                        |
| 964 | <i>Neurospora sp. FGSC 26633</i> | Sordario | Asco    | 36 | 23 | 33 | 34 | 126 | GCA_009804945.1 | University of California,<br>Berkeley                        |

|     |                                  |          |         |    |    |    |    |     |                 |                                                                              |
|-----|----------------------------------|----------|---------|----|----|----|----|-----|-----------------|------------------------------------------------------------------------------|
| 965 | <i>Neurospora sp. FGSC 26623</i> | Sordario | Asco    | 37 | 24 | 31 | 34 | 126 | GCA_009805935.1 | University of California, Berkeley                                           |
| 966 | <i>Heterobasidion parviporum</i> | Agarico  | Basidio | 36 | 22 | 12 | 56 | 126 | GCA_002994785.1 | University of Helsinki                                                       |
| 967 | <i>Neurospora sp. FGSC 26629</i> | Sordario | Asco    | 35 | 23 | 33 | 34 | 125 | GCA_009805155.1 | University of California, Berkeley                                           |
| 968 | <i>Neurospora sp. LNF1-1</i>     | Sordario | Asco    | 35 | 23 | 33 | 34 | 125 | GCA_009805225.1 | University of California, Berkeley                                           |
| 969 | <i>Neurospora sp. FGSC 26630</i> | Sordario | Asco    | 35 | 23 | 33 | 34 | 125 | GCA_009805085.1 | University of California, Berkeley                                           |
| 970 | <i>Neurospora sp. FGSC 26627</i> | Sordario | Asco    | 35 | 23 | 33 | 34 | 125 | GCA_009805365.1 | University of California, Berkeley                                           |
| 971 | <i>Neurospora sp. FGSC 26634</i> | Sordario | Asco    | 37 | 22 | 30 | 36 | 125 | GCA_009804985.1 | University of California, Berkeley                                           |
| 972 | <i>Neurospora sp. FGSC 26625</i> | Sordario | Asco    | 38 | 22 | 30 | 35 | 125 | GCA_009805435.1 | University of California, Berkeley                                           |
| 973 | <i>Neurospora africana</i>       | Sordario | Asco    | 36 | 21 | 34 | 34 | 125 | GCA_000604205.2 | EBC                                                                          |
| 974 | <i>Lyophyllum shimeji</i>        | Agarico  | Basidio | 34 | 16 | 14 | 61 | 125 | GCA_001950515.1 | RIKEN Center for Life Science Technologies, Division of Genomic Technologies |
| 975 | <i>Sporormia fimetaria</i>       | Dothideo | Asco    | 40 | 14 | 37 | 34 | 125 | GCA_010093795.1 | DOE Joint Genome Institute                                                   |
| 976 | <i>Fragosphaeria purpurea</i>    | Sordario | Asco    | 38 | 22 | 32 | 32 | 124 | GCA_002778095.1 | University of Montana                                                        |
| 977 | <i>Penicillium sp. HKF2</i>      | Eurotio  | Asco    | 38 | 40 | 16 | 30 | 124 | GCA_002000375.1 | CSIR-NEERI                                                                   |
| 978 | <i>Penicillium verrucosum</i>    | Eurotio  | Asco    | 40 | 42 | 16 | 26 | 124 | GCA_000970515.2 | Max Rubner-Institut                                                          |
| 979 | <i>Ramularia coccinea</i>        | Dothideo | Asco    | 41 | 22 | 35 | 26 | 124 | GCA_013461505.1 | Yancheng Institute of Technology                                             |
| 980 | <i>Sporothrix globosa</i>        | Sordario | Asco    | 35 | 31 | 28 | 30 | 124 | GCA_001630435.1 | University of Messina                                                        |
| 981 | <i>Neurospora sp. CHS-2018b</i>  | Sordario | Asco    | 36 | 19 | 34 | 35 | 124 | GCA_009806015.1 | University of California, Berkeley                                           |
| 982 | <i>Monilinia fructigena</i>      | Leotio   | Asco    | 34 | 46 | 14 | 30 | 124 | GCA_003260565.1 | Rita Milvia De Miccolis                                                      |
| 983 | <i>Macrocybe gigantea</i>        | Agarico  | Basidio | 36 | 20 | 14 | 54 | 124 | GCA_011319805.1 | Angelini's shared submissions                                                |
| 984 | <i>Amorphotheca resiniae</i>     | Leotio   | Asco    | 25 | 39 | 14 | 45 | 123 | GCA_001270345.1 | Yunnan Agricultural University                                               |
| 985 | <i>Sporothrix insectorum</i>     | Sordario | Asco    | 37 | 21 | 32 | 33 | 123 | GCA_001636815.1 | East China University of Science and Technology                              |
| 986 | <i>Pseudocercospora musae</i>    | Dothideo | Asco    | 34 | 39 | 16 | 34 | 123 | GCA_001578225.1 | Shanghai Institutes for Biological Sciences, CAS                             |
| 987 | <i>Trichothecium roseum</i>      | Sordario | Asco    | 37 | 36 | 26 | 24 | 123 | GCA_003012185.1 | University of California Davis                                               |
| 988 | <i>Penicillium nordicum</i>      | Eurotio  | Asco    | 40 | 42 | 16 | 25 | 123 | GCA_001278595.1 | USDA, ARS, NCAUR                                                             |
| 989 | <i>Penicillium coprophilum</i>   | Eurotio  | Asco    | 41 | 32 | 18 | 32 | 123 | GCA_002072405.1 | Agriculture and Agri-Food Canada                                             |
| 990 | <i>Sporothrix schenckii</i>      | Sordario | Asco    | 38 | 27 | 28 | 30 | 123 | GCA_000961545.1 | Chalmers University of Technology                                            |
| 991 | <i>Agaricales sp. HM26-F1</i>    | Agarico  | Basidio | 31 | 26 | 16 | 50 | 123 | GCA_002718315.1 | LNCC                                                                         |
|     |                                  |          |         |    |    |    |    |     |                 | Shanghai Academy of Agricultural Sciences                                    |

|      |                                       |          |         |    |    |    |    |     |                 |                                                                                                                                                                              |
|------|---------------------------------------|----------|---------|----|----|----|----|-----|-----------------|------------------------------------------------------------------------------------------------------------------------------------------------------------------------------|
| 992  | <i>Polytolypa hystricis</i>           | Eurotio  | Asco    | 41 | 24 | 32 | 26 | 123 | GCA_002573605.1 | Broad Institute                                                                                                                                                              |
| 993  | <i>Lachnellula occidentalis</i>       | Leotio   | Asco    | 38 | 36 | 14 | 34 | 122 | GCA_007821535.1 | Canadian Food Inspection Agency (CFIA)                                                                                                                                       |
| 994  | <i>Neurospora sp. FGSC 26626</i>      | Sordario | Asco    | 37 | 22 | 28 | 35 | 122 | GCA_009805385.1 | University of California, Berkeley                                                                                                                                           |
| 995  | <i>Pseudovirgaria hyperparasitica</i> | Dothideo | Asco    | 28 | 36 | 24 | 34 | 122 | GCA_010093815.1 | DOE Joint Genome Institute Laboratory for Conservation and Utilization of Bio-Resources and Key Laboratory for Microbial Diversity in Southwest China, Ministry of Education |
| 996  | <i>Arthrobotrys entomopaga</i>        | Orbilio  | Asco    | 42 | 30 | 25 | 25 | 122 | GCA_012184315.1 | University of Toronto Mississauga                                                                                                                                            |
| 997  | <i>Myriosclerotinia curreyana</i>     | Leotio   | Asco    | 38 | 36 | 18 | 30 | 122 | GCA_002162495.1 | Institute for Applied Biosciences                                                                                                                                            |
| 998  | <i>Arthrobotrys flagrans</i>          | Orbilio  | Asco    | 36 | 42 | 20 | 24 | 122 | GCA_004000055.1 | University of California, Berkeley                                                                                                                                           |
| 999  | <i>Neurospora sp. FGSC 26624</i>      | Sordario | Asco    | 35 | 22 | 30 | 34 | 121 | GCA_009805485.1 | DOE Joint Genome Institute                                                                                                                                                   |
| 1000 | <i>Lophium mytilinum</i>              | Dothideo | Asco    | 44 | 20 | 15 | 42 | 121 | GCA_010093605.1 | Institute of Bast Fiber Crops, Chinese Academy of Agricultural Sciences                                                                                                      |
| 1001 | <i>Hericium erinaceus</i>             | Agarico  | Basidio | 42 | 15 | 16 | 48 | 121 | GCA_006506795.2 | Canada's Michael Smith Genome Sciences Centre                                                                                                                                |
| 1002 | <i>Nothophaeocryptopus gaeumannii</i> | Dothideo | Asco    | 37 | 34 | 8  | 41 | 120 | GCA_002116385.1 | INAIL-Research Area                                                                                                                                                          |
| 1003 | <i>Penicillium sp. CF05</i>           | Eurotio  | Asco    | 34 | 44 | 15 | 27 | 120 | GCA_002916455.1 | Shandong Agricultural University                                                                                                                                             |
| 1004 | <i>Talaromyces funiculosus</i>        | Eurotio  | Asco    | 29 | 36 | 28 | 27 | 120 | GCA_004299765.1 | University of Turin                                                                                                                                                          |
| 1005 | <i>Penicillium griseofulvum</i>       | Eurotio  | Asco    | 40 | 33 | 19 | 28 | 120 | GCA_001561935.1 | University of Florida                                                                                                                                                        |
| 1006 | <i>Raffaelea lauricola</i>            | Sordario | Asco    | 40 | 28 | 22 | 30 | 120 | GCA_014183025.1 | LNCC                                                                                                                                                                         |
| 1007 | <i>Sporothrix brasiliensis</i>        | Sordario | Asco    | 37 | 26 | 28 | 29 | 120 | GCA_000820605.1 | Korea University                                                                                                                                                             |
| 1008 | <i>Dentipellis sp. KUC8613</i>        | Agarico  | Basidio | 41 | 17 | 16 | 46 | 120 | GCA_002286715.1 | EBC                                                                                                                                                                          |
| 1009 | <i>Neurospora sublineolata</i>        | Sordario | Asco    | 33 | 22 | 33 | 32 | 120 | GCA_000604185.2 | Nanyang Technological University                                                                                                                                             |
| 1010 | <i>Penicillium oxalicum</i>           | Eurotio  | Asco    | 32 | 47 | 26 | 15 | 120 | GCA_005546515.1 | DOE Joint Genome Institute JGI                                                                                                                                               |
| 1011 | <i>Phlebiopsis gigantea</i>           | Agarico  | Basidio | 37 | 21 | 17 | 45 | 120 | GCA_000832265.1 | Canada's Michael Smith Genome Sciences Centre                                                                                                                                |
| 1012 | <i>Heterobasidion irregulare</i>      | Agarico  | Basidio | 34 | 23 | 11 | 52 | 120 | GCA_000320585.2 | University of California Davis                                                                                                                                               |
| 1013 | <i>Ramularia endophylla</i>           | Dothideo | Asco    | 38 | 38 | 13 | 30 | 119 | GCA_002116395.1 | University of California, Berkeley                                                                                                                                           |
| 1014 | <i>Pseudocercospora eumusae</i>       | Dothideo | Asco    | 32 | 42 | 16 | 29 | 119 | GCA_001578235.1 | Citrus Research and Education Center, University of Florida                                                                                                                  |
| 1015 | <i>Neurospora tetraspora</i>          | Sordario | Asco    | 34 | 23 | 30 | 32 | 119 | GCA_009806155.1 | Seoul National University                                                                                                                                                    |
| 1016 | <i>Phyllosticta capitalensis</i>      | Dothideo | Asco    | 32 | 38 | 10 | 39 | 119 | GCA_001604925.1 |                                                                                                                                                                              |
| 1017 | <i>Heterobasidion annosum</i>         | Agarico  | Basidio | 32 | 24 | 10 | 53 | 119 | GCA_000633895.1 |                                                                                                                                                                              |

|      |                                       |          |         |    |    |    |    |     |                 |                                                                                                          |
|------|---------------------------------------|----------|---------|----|----|----|----|-----|-----------------|----------------------------------------------------------------------------------------------------------|
| 1018 | <i>Claviceps aff. purpurea</i>        | Sordario | Asco    | 18 | 58 | 28 | 14 | 118 | GCA_004016085.1 | Agriculture and Agri-Food<br>Canada                                                                      |
| 1019 | <i>Penicillium nalgiovense</i>        | Eurotio  | Asco    | 34 | 43 | 15 | 26 | 118 | GCA_000577395.2 | INRA-LIPM                                                                                                |
| 1020 | <i>Hyphodiscus sp. D1413</i>          | Leotio   | Asco    | 34 | 34 | 20 | 30 | 118 | GCA_003988895.1 | Manaaki Whenua Landcare<br>Research                                                                      |
| 1021 | <i>Trichocladium griseum</i>          | Sordario | Asco    | 39 | 17 | 35 | 27 | 118 | GCA_011316235.1 | Embrapa Agroenergia                                                                                      |
| 1022 | <i>Cercospora soja</i>                | Dothideo | Asco    | 33 | 32 | 20 | 32 | 117 | GCA_002534735.1 | Chinese Academy of Sciences                                                                              |
| 1023 | <i>Gelatoporia subvermispora</i>      | Agarico  | Basidio | 31 | 14 | 26 | 46 | 117 | GCA_000320605.2 | DOE Joint Genome Institute                                                                               |
| 1024 | <i>Macrocystidia cucumis</i>          | Agarico  | Basidio | 36 | 12 | 13 | 56 | 117 | GCA_001179725.1 | Royal Botanic Gardens, Kew                                                                               |
| 1025 | <i>Aspergillus saccharolyticus</i>    | Eurotio  | Asco    | 32 | 45 | 13 | 26 | 116 | GCA_003184585.1 | DOE Joint Genome Institute                                                                               |
| 1026 | <i>Cyanoderma asteris</i>             | Lecanoro | Asco    | 34 | 34 | 18 | 30 | 116 | GCA_900618795.1 | CEBITEC                                                                                                  |
| 1027 | <i>Gloeostereum incarnatum</i>        | Agarico  | Basidio | 37 | 18 | 16 | 45 | 116 | GCA_010588315.1 | Jilin Agricultural University                                                                            |
| 1028 | <i>Hericium alpestre</i>              | Agarico  | Basidio | 40 | 16 | 18 | 42 | 116 | GCA_004681135.1 | IHI Zittau / TU Dresden                                                                                  |
| 1029 | <i>Leucocalocybe mongolica</i>        | Agarico  | Basidio | 34 | 22 | 16 | 44 | 116 | GCA_013420905.1 | Jilin Agricultural University                                                                            |
| 1030 | <i>Trichoderma sp. IMV 00454</i>      | Sordario | Asco    | 38 | 22 | 33 | 22 | 115 | GCA_001931985.1 | Jet Propulsion Laboratory,<br>California Institute of<br>Technology                                      |
| 1031 | <i>Talaromyces stipitatus</i>         | Eurotio  | Asco    | 28 | 31 | 27 | 29 | 115 | GCA_000003125.1 | J. Craig Venter Institute                                                                                |
| 1032 | <i>Dentipellis fragilis</i>           | Agarico  | Basidio | 40 | 16 | 16 | 43 | 115 | GCA_004679275.1 | IHI Zittau / TU Dresden                                                                                  |
| 1033 | <i>Morchella sp. a71</i>              | Pezizo   | Asco    | 39 | 41 | 15 | 20 | 115 | GCA_013407065.1 | Chongqing Normal University                                                                              |
| 1034 | <i>Raffaelea arxii</i>                | Sordario | Asco    | 37 | 26 | 14 | 36 | 113 | GCA_002778165.1 | University of Montana                                                                                    |
| 1035 | <i>Teratosphaeria zuluensis</i>       | Dothideo | Asco    | 30 | 35 | 13 | 35 | 113 | GCA_007113905.1 | University of Pretoria                                                                                   |
| 1036 | <i>Sistotremastrum suecicum</i>       | Agarico  | Basidio | 38 | 3  | 18 | 54 | 113 | GCA_001632355.1 | DOE Joint Genome Institute                                                                               |
| 1037 | <i>Trichoderma hamatum</i>            | Sordario | Asco    | 34 | 30 | 28 | 20 | 112 | GCA_000331835.2 | University of Exeter                                                                                     |
| 1038 | <i>Trichoderma guizhouense</i>        | Sordario | Asco    | 37 | 22 | 32 | 21 | 112 | GCA_002022785.1 | Nanjing Agricultural University                                                                          |
| 1039 | <i>Coniophora puteana</i>             | Agarico  | Basidio | 40 | 24 | 14 | 34 | 112 | GCA_000271625.1 | DOE Joint Genome Institute                                                                               |
| 1040 | <i>Acidomyces sp. 'richmondensis'</i> | Dothideo | Asco    | 25 | 46 | 20 | 21 | 112 | GCA_003545705.1 | University of Massachusetts                                                                              |
| 1041 | <i>Aspergillus heteromorphus</i>      | Eurotio  | Asco    | 31 | 44 | 12 | 25 | 112 | GCA_003184545.1 | DOE Joint Genome Institute                                                                               |
| 1042 | <i>Microcyclosporella mali</i>        | Dothideo | Asco    | 30 | 30 | 20 | 32 | 112 | GCA_002785985.1 | Northwest A&F University                                                                                 |
| 1043 | <i>Bondarzewia mesenterica</i>        | Agarico  | Basidio | 40 | 10 | 10 | 52 | 112 | GCA_004802705.1 | IHI Zittau / TU Dresden                                                                                  |
| 1044 | <i>Phyllosticta citricarpa</i>        | Dothideo | Asco    | 29 | 36 | 10 | 36 | 111 | GCA_000382785.1 | Zhejiang university                                                                                      |
| 1045 | <i>Serendipita indica</i>             | Agarico  | Basidio | 28 | 19 | 36 | 28 | 111 | GCA_000313545.1 | Institute of Bioinformatics and<br>Systems Biology, Helmholtz<br>Zentrum München,<br>Neuherberg, Germany |
| 1046 | <i>Trichoderma atrobrunneum</i>       | Sordario | Asco    | 37 | 22 | 30 | 21 | 110 | GCA_003439915.1 | Institute of Sciences of Food<br>Production (ISPA)                                                       |
| 1047 | <i>Trichoderma lentiforme</i>         | Sordario | Asco    | 37 | 20 | 32 | 21 | 110 | GCA_011066345.1 | Embrapa Agroenergia                                                                                      |
| 1048 | <i>Mycosphaerella arachidis</i>       | Dothideo | Asco    | 30 | 34 | 14 | 32 | 110 | GCA_001297265.1 | USDA                                                                                                     |
| 1049 | <i>Cladophialophora immunda</i>       | Eurotio  | Asco    | 28 | 15 | 15 | 52 | 110 | GCA_000835495.1 | Broad Institute                                                                                          |
| 1050 | <i>Hydnomerulius pinastri</i>         | Agarico  | Basidio | 44 | 18 | 14 | 34 | 110 | GCA_000827185.1 | DOE Joint Genome Institute                                                                               |
| 1051 | <i>Dothistroma pini</i>               | Dothideo | Asco    | 31 | 30 | 16 | 32 | 109 | GCA_002116355.1 | Canada's Michael Smith<br>Genome Sciences Centre                                                         |

|      |                                      |          |         |    |    |    |    |     |                 |                                                                              |
|------|--------------------------------------|----------|---------|----|----|----|----|-----|-----------------|------------------------------------------------------------------------------|
| 1052 | <i>Saitozyma sp. JCM 24511</i>       | Tremello | Basidio | 27 | 48 | 18 | 16 | 109 | GCA_001600855.1 | RIKEN Center for Life Science Technologies, Division of Genomic Technologies |
| 1053 | <i>Saitozyma podzolica</i>           | Tremello | Basidio | 28 | 46 | 17 | 18 | 109 | GCA_003942215.1 | Karlsruhe Institute of Technology                                            |
| 1054 | <i>Porodaedalea pini</i>             | Agarico  | Basidio | 26 | 22 | 14 | 47 | 109 | GCA_002794775.1 | Academia Sinica                                                              |
| 1055 | <i>Obba rivulosa</i>                 | Agarico  | Basidio | 30 | 12 | 23 | 44 | 109 | GCA_001687445.1 | DOE Joint Genome Institute                                                   |
| 1056 | <i>Grifola frondosa</i>              | Agarico  | Basidio | 30 | 13 | 14 | 52 | 109 | GCA_001683735.1 | Korea University                                                             |
| 1057 | <i>Psilocybe cyanescens</i>          | Agarico  | Basidio | 32 | 8  | 22 | 47 | 109 | GCA_002938375.1 | Ohio State University                                                        |
| 1058 | <i>Rickenella mellea</i>             | Agarico  | Basidio | 29 | 23 | 2  | 55 | 109 | GCA_004355085.1 | DOE Joint Genome Institute                                                   |
| 1059 | <i>Penicillium sp. OUCMDZ-019</i>    | Eurotio  | Asco    | 32 | 33 | 14 | 29 | 108 | GCA_011750695.1 | ocean university of China                                                    |
| 1060 | <i>Mycosphaerella populi</i>         | Dothideo | Asco    | 28 | 37 | 13 | 30 | 108 | GCA_002153405.1 | Canada's Michael Smith Genome Sciences Centre                                |
| 1061 | <i>Acremonium chrysogenum</i>        | Sordario | Asco    | 38 | 24 | 25 | 21 | 108 | GCA_000769265.1 | Ruhr-Universitaet Bochum                                                     |
| 1062 | <i>Pseudonectria buxi</i>            | Sordario | Asco    | 34 | 44 | 12 | 18 | 108 | GCA_003693545.1 | USDA-ARS                                                                     |
| 1063 | <i>Marssonina coronariae</i>         | Leotio   | Asco    | 25 | 43 | 11 | 29 | 108 | GCA_002204255.1 | Nanjing Forestry University                                                  |
| 1064 | <i>Phyllosticta citriasiana</i>      | Dothideo | Asco    | 29 | 34 | 10 | 35 | 108 | GCA_009193405.1 | Zhejiang University                                                          |
| 1065 | <i>Collybia sp. MG36</i>             | Agarico  | Basidio | 35 | 14 | 8  | 51 | 108 | GCA_003313185.1 | Kunming University of Science and Technology                                 |
| 1066 | <i>Cercospora zae-maydis</i>         | Dothideo | Asco    | 32 | 26 | 18 | 31 | 107 | GCA_010093985.1 | JGI                                                                          |
| 1067 | <i>Teratosphaeria gauchensis</i>     | Dothideo | Asco    | 29 | 36 | 12 | 30 | 107 | GCA_007113925.1 | University of Pretoria                                                       |
| 1068 | <i>Marssonina rosae</i>              | Leotio   | Asco    | 25 | 42 | 10 | 30 | 107 | GCA_011750715.1 | Nanjing Forestry University                                                  |
| 1069 | <i>Botryobasidium botryosum</i>      | Agarico  | Basidio | 42 | 9  | 25 | 30 | 106 | GCA_000697705.1 | JGI                                                                          |
| 1070 | <i>Pseudonectria foliicola</i>       | Sordario | Asco    | 32 | 46 | 12 | 16 | 106 | GCA_002911195.1 | USDA                                                                         |
| 1071 | <i>Coprinopsis strossmayeri</i>      | Agarico  | Basidio | 34 | 6  | 26 | 40 | 106 | GCA_900156845.1 | UNIVERSITY OF BRISTOL                                                        |
| 1072 | <i>Trichoderma harzianum</i>         | Sordario | Asco    | 36 | 19 | 30 | 20 | 105 | GCA_010015525.1 | The University of Adelaide                                                   |
| 1073 | <i>Talaromyces borbonicus</i>        | Eurotio  | Asco    | 22 | 40 | 29 | 14 | 105 | GCA_002916415.1 | University of Naples "Federico II"                                           |
| 1074 | <i>Aspergillus sclerotialis</i>      | Eurotio  | Asco    | 35 | 30 | 16 | 24 | 105 | GCA_003589665.1 | University of Natural Resources and Life Sciences, Vienna                    |
| 1075 | <i>Byssoschlamys sp. AF001</i>       | Eurotio  | Asco    | 24 | 28 | 11 | 42 | 105 | GCA_002914405.1 | University of Oklahoma                                                       |
| 1076 | <i>Sodiomyces alkalinus</i>          | Sordario | Asco    | 39 | 16 | 24 | 26 | 105 | GCA_003711515.1 | DOE Joint Genome Institute                                                   |
| 1077 | <i>Pluteus cervinus</i>              | Agarico  | Basidio | 32 | 8  | 13 | 52 | 105 | GCA_004369065.1 | DOE Joint Genome Institute                                                   |
| 1078 | <i>Sistotremastrum niveocremeum</i>  | Agarico  | Basidio | 34 | 3  | 18 | 50 | 105 | GCA_001630475.1 | DOE Joint Genome Institute                                                   |
| 1079 | <i>Trichoderma koningiopsis</i>      | Sordario | Asco    | 30 | 25 | 29 | 20 | 104 | GCA_002246955.1 | INBIOMIS                                                                     |
| 1080 | <i>Passalora sequoiae</i>            | Dothideo | Asco    | 29 | 28 | 12 | 35 | 104 | GCA_013248845.1 | USDA                                                                         |
| 1081 | <i>Cutaneotrichosporon mucooides</i> | Tremello | Basidio | 27 | 26 | 20 | 31 | 104 | GCA_003116955.1 | RIKEN Center for Life Science Technologies, Division of Genomic Technologies |
| 1082 | <i>Schizopora paradoxa</i>           | Agarico  | Basidio | 31 | 8  | 14 | 51 | 104 | GCA_001020605.1 | DOE Joint Genome Institute                                                   |
| 1083 | <i>Jaapia argillacea</i>             | Agarico  | Basidio | 48 | 10 | 16 | 30 | 104 | GCA_000697665.1 | DOE Joint Genome Institute                                                   |
| 1084 | <i>Trichoderma gamsii</i>            | Sordario | Asco    | 29 | 25 | 30 | 19 | 103 | GCA_002894205.1 | CSIRO                                                                        |
| 1085 | <i>Cercospora zeina</i>              | Dothideo | Asco    | 30 | 28 | 17 | 28 | 103 | GCA_002844615.1 | University of Pretoria                                                       |

|      |                                       |          |         |    |    |    |    |     |                 |                                                                                                                                                   |
|------|---------------------------------------|----------|---------|----|----|----|----|-----|-----------------|---------------------------------------------------------------------------------------------------------------------------------------------------|
| 1086 | <i>Chlorenchocelia torta</i>          | Leotio   | Asco    | 38 | 20 | 18 | 27 | 103 | GCA_003988815.1 | Manaaki Whenua Landcare Research                                                                                                                  |
| 1087 | <i>Delphinella strobiligena</i>       | Dothideo | Asco    | 25 | 34 | 8  | 36 | 103 | GCA_009982845.1 | DOE Joint Genome Institute                                                                                                                        |
| 1088 | <i>Antrodiella citrinella</i>         | Agarico  | Basidio | 33 | 10 | 20 | 40 | 103 | GCA_004802725.1 | IHI Zittau / TU Dresden                                                                                                                           |
| 1089 | <i>Trichothecium sympodiale</i>       | Sordario | Asco    | 32 | 20 | 29 | 21 | 102 | GCA_003012115.1 | USDA, ARS, NCAUR                                                                                                                                  |
| 1090 | <i>Aspergillus clavatus</i>           | Eurotio  | Asco    | 34 | 28 | 21 | 19 | 102 | GCA_000002715.1 | J. Craig Venter Institute                                                                                                                         |
| 1091 | <i>Rasamsonia emersonii</i>           | Eurotio  | Asco    | 28 | 32 | 16 | 26 | 102 | GCA_000968595.1 | DSM Bio-based Products & Services B.V.                                                                                                            |
| 1092 | <i>Neurospora tetrasperma</i>         | Sordario | Asco    | 29 | 22 | 25 | 26 | 102 | GCA_000213195.1 | US DOE Joint Genome Institute (JGI-PGF)                                                                                                           |
| 1093 | <i>Aspergillus ochraceoroseus</i>     | Eurotio  | Asco    | 30 | 34 | 18 | 20 | 102 | GCA_002846915.2 | DOE Joint Genome Institute                                                                                                                        |
| 1094 | <i>Coccinonectria pachysandricola</i> | Sordario | Asco    | 30 | 42 | 10 | 20 | 102 | GCA_013283235.1 | USDA-ARS                                                                                                                                          |
| 1095 | <i>Aspergillus chevalieri</i>         | Eurotio  | Asco    | 32 | 28 | 12 | 30 | 102 | GCA_001599875.1 | RIKEN Center for Life Science Technologies, Division of Genomic Technologies                                                                      |
| 1096 | <i>Neurospora crassa</i>              | Sordario | Asco    | 27 | 23 | 25 | 26 | 101 | GCA_007478085.1 | Ronin Genetics                                                                                                                                    |
| 1097 | <i>Ochroconis constricta</i>          | Dothideo | Asco    | 32 | 18 | 9  | 42 | 101 | GCA_000611715.1 | UNIVERSITY OF MALAYA                                                                                                                              |
| 1098 | <i>Thermoascaceae sp. COH1141</i>     | Eurotio  | Asco    | 26 | 25 | 12 | 38 | 101 | GCA_003123655.1 | Jet Propulsion Laboratory, California Institute of Technology                                                                                     |
| 1099 | <i>Aspergillus rambellii</i>          | Eurotio  | Asco    | 29 | 34 | 17 | 21 | 101 | GCA_000986645.1 | USDA-ARS-SRRC                                                                                                                                     |
| 1100 | <i>Lineolata rhizophorae</i>          | Dothideo | Asco    | 35 | 10 | 28 | 28 | 101 | GCA_010093515.1 | DOE Joint Genome Institute                                                                                                                        |
| 1101 | <i>Calcarisporium arbuscula</i>       | Sordario | Asco    | 32 | 22 | 19 | 27 | 100 | GCA_009828645.1 | Zhejiang University                                                                                                                               |
| 1102 | <i>Trichoderma erinaceum</i>          | Sordario | Asco    | 29 | 25 | 29 | 17 | 100 | GCA_013365115.1 | None                                                                                                                                              |
| 1103 | <i>Ramularia collo-cygni</i>          | Dothideo | Asco    | 36 | 20 | 16 | 28 | 100 | GCA_900074925.1 | Technische Universitat Munchen - WZW                                                                                                              |
| 1104 | <i>Talaromyces marneffeii</i>         | Eurotio  | Asco    | 24 | 28 | 18 | 30 | 100 | GCA_009650675.1 | Broad Institute                                                                                                                                   |
| 1105 | <i>Drechslerella brochopaga</i>       | Orbilio  | Asco    | 31 | 32 | 16 | 21 | 100 | GCA_012184305.1 | Laboratory for Conservation and Utilization of Bio-Resources and Key Laboratory for Microbial Diversity in Southwest China, Ministry of Education |
| 1106 | <i>Gymnopus luxurians</i>             | Agarico  | Basidio | 30 | 22 | 14 | 34 | 100 | GCA_000827265.1 | DOE JGI                                                                                                                                           |
| 1107 | <i>Trichoderma atroviride</i>         | Sordario | Asco    | 28 | 26 | 29 | 16 | 99  | GCA_001599035.1 | RIKEN Center for Life Science Technologies, Division of Genomic Technologies                                                                      |
| 1108 | <i>[Talaromyces] leycettanus</i>      | Eurotio  | Asco    | 28 | 32 | 23 | 16 | 99  | GCA_000787455.1 | none                                                                                                                                              |
| 1109 | <i>Trichothecium ovalisporum</i>      | Sordario | Asco    | 33 | 17 | 29 | 20 | 99  | GCA_003012195.1 | USDA, ARS, NCAUR                                                                                                                                  |
| 1110 | <i>Saccharata proteae</i>             | Dothideo | Asco    | 30 | 28 | 10 | 31 | 99  | GCA_010015785.1 | DOE Joint Genome Institute                                                                                                                        |
| 1111 | <i>Fomitiporia mediterranea</i>       | Agarico  | Basidio | 30 | 13 | 10 | 46 | 99  | GCA_000271605.1 | JGI                                                                                                                                               |
| 1112 | <i>Trichoderma viride</i>             | Sordario | Asco    | 31 | 18 | 30 | 19 | 98  | GCA_007896495.1 | Institute of Biology, Shnaodong Academy of Science, China                                                                                         |
| 1113 | <i>Trichoderma asperellum</i>         | Sordario | Asco    | 30 | 22 | 28 | 18 | 98  | GCA_013423425.1 | Chubu university                                                                                                                                  |

|      |                                     |          |         |    |    |    |    |    |                 |                                                                                             |
|------|-------------------------------------|----------|---------|----|----|----|----|----|-----------------|---------------------------------------------------------------------------------------------|
| 1114 | <i>Cantharellus appalachiensis</i>  | Agarico  | Basidio | 27 | 24 | 29 | 18 | 98 | GCA_003314335.1 | Kunming University of Science and Technology                                                |
| 1115 | <i>Chlorociboria aeruginascens</i>  | Leotio   | Asco    | 32 | 19 | 20 | 27 | 98 | GCA_002276475.2 | IHI Zittau / TU Dresden                                                                     |
| 1116 | <i>Heliocybe sulcata</i>            | Agarico  | Basidio | 30 | 20 | 18 | 30 | 98 | GCA_004369045.1 | DOE Joint Genome Institute                                                                  |
| 1117 | <i>Aspergillus tritici</i>          | Eurotio  | Asco    | 34 | 24 | 16 | 24 | 98 | GCA_009812425.1 | Universidad de Antioquia                                                                    |
| 1118 | <i>Dothiostroma septosporum</i>     | Dothideo | Asco    | 28 | 21 | 14 | 34 | 97 | GCA_002236755.2 | Massey University                                                                           |
| 1119 | <i>Neurospora discreta</i>          | Sordario | Asco    | 27 | 21 | 23 | 26 | 97 | GCA_009805215.1 | University of California, Berkeley                                                          |
| 1120 | <i>Blumeriella jaapii</i>           | Leotio   | Asco    | 28 | 28 | 12 | 29 | 97 | GCA_009599575.1 | Michigan State University                                                                   |
| 1121 | <i>Plicaturopsis crispa</i>         | Agarico  | Basidio | 28 | 20 | 10 | 38 | 96 | GCA_000827205.1 | DOE Joint Genome Institute                                                                  |
| 1122 | <i>Ophiostoma novo-ulmi</i>         | Sordario | Asco    | 32 | 26 | 14 | 24 | 96 | GCA_000317715.1 | Association of Biomolecular Resource Facilities                                             |
| 1123 | <i>Coniferiporia sulphurascens</i>  | Agarico  | Basidio | 26 | 14 | 12 | 44 | 96 | GCA_002794785.1 | Biodiversity Research Center, Academia Sinica                                               |
| 1124 | <i>Pochonia chlamydosporia</i>      | Sordario | Asco    | 30 | 22 | 16 | 27 | 95 | GCA_001653235.2 | The Institute of Vegetables and Flowers CAAS                                                |
| 1125 | <i>Cryomyces minteri</i>            | Dothideo | Asco    | 22 | 9  | 12 | 52 | 95 | GCA_005059845.1 | University of California, Riverside                                                         |
| 1126 | <i>Fomitopsis palustris</i>         | Agarico  | Basidio | 23 | 30 | 18 | 24 | 95 | GCA_001937815.1 | National Institute of Forest Science                                                        |
| 1127 | <i>Byssochlamys nivea</i>           | Eurotio  | Asco    | 25 | 26 | 11 | 33 | 95 | GCA_003116535.1 | Cornell University                                                                          |
| 1128 | <i>Aspergillus campestris</i>       | Eurotio  | Asco    | 30 | 25 | 18 | 22 | 95 | GCA_002847485.1 | DOE Joint Genome Institute                                                                  |
| 1129 | <i>Aulographum hederæ</i>           | Dothideo | Asco    | 22 | 26 | 14 | 32 | 94 | GCA_010015705.1 | DOE Joint Genome Institute                                                                  |
| 1130 | <i>Penicillium italicum</i>         | Eurotio  | Asco    | 34 | 27 | 9  | 24 | 94 | GCA_000769765.1 | Center for Genomic Regulation (CRG)                                                         |
| 1131 | <i>Pseudophaeomoniella oleicola</i> | Eurotio  | Asco    | 25 | 38 | 11 | 20 | 94 | GCA_003868215.1 | University of Bari "A. Moro"                                                                |
| 1132 | <i>Hortaea thailandica</i>          | Dothideo | Asco    | 26 | 32 | 12 | 24 | 94 | GCA_005059885.1 | University of California, Riverside                                                         |
| 1133 | <i>Aspergillus taichungensis</i>    | Eurotio  | Asco    | 30 | 25 | 17 | 22 | 94 | GCA_002850765.1 | DOE Joint Genome Institute                                                                  |
| 1134 | <i>Aspergillus coremiiformis</i>    | Eurotio  | Asco    | 27 | 38 | 10 | 19 | 94 | GCA_009193565.1 | DOE Joint Genome Institute                                                                  |
| 1135 | <i>Chaetomium thermophilum</i>      | Sordario | Asco    | 34 | 14 | 26 | 20 | 94 | GCA_000221225.1 | EMBL                                                                                        |
| 1136 | <i>Sarcomyxa edulis</i>             | Agarico  | Basidio | 24 | 16 | 14 | 40 | 94 | GCA_009761415.1 | Engineering Research Center of Chinese Ministry of Education for Edible and Medicinal Fungi |
| 1137 | <i>Clitocybe nebularis</i>          | Agarico  | Basidio | 28 | 16 | 12 | 38 | 94 | GCA_900068955.1 | Royal Botanic Gardens, Kew                                                                  |
| 1138 | <i>Fomitopsis pinicola</i>          | Agarico  | Basidio | 24 | 27 | 16 | 26 | 93 | GCA_000344655.2 | DOE Joint Genome Institute                                                                  |
| 1139 | <i>Aspergillus cristatus</i>        | Eurotio  | Asco    | 28 | 24 | 11 | 30 | 93 | GCA_001693355.1 | Shandong Freda Pharmaceutical Group Corporation                                             |
| 1140 | <i>Gymnopus confluens</i>           | Agarico  | Basidio | 25 | 12 | 10 | 46 | 93 | GCA_013368555.1 | Lund University                                                                             |
| 1141 | <i>Talaromyces atroroseus</i>       | Eurotio  | Asco    | 26 | 30 | 13 | 23 | 92 | GCA_001907595.1 | Technical University of Denmark                                                             |
| 1142 | <i>Talaromyces piceae</i>           | Eurotio  | Asco    | 22 | 32 | 18 | 20 | 92 | GCA_001657655.1 | Tianjin Institute of Biotechnology, CAS                                                     |

|      |                                       |          |         |    |    |    |    |    |                 |                                                                                  |
|------|---------------------------------------|----------|---------|----|----|----|----|----|-----------------|----------------------------------------------------------------------------------|
| 1143 | <i>Amesia nigricolor</i>              | Sordario | Asco    | 30 | 20 | 20 | 22 | 92 | GCA_004802645.1 | Qingdao University                                                               |
| 1144 | <i>Teratosphaeria nubilosa</i>        | Dothideo | Asco    | 23 | 33 | 11 | 25 | 92 | GCA_010093825.1 | DOE Joint Genome Institute                                                       |
| 1145 | <i>Penicillium digitatum</i>          | Eurotio  | Asco    | 30 | 32 | 10 | 20 | 92 | GCA_012295545.1 | Huazhong Agricultural University                                                 |
| 1146 | <i>Gloeophyllum trabeum</i>           | Agarico  | Basidio | 26 | 24 | 16 | 26 | 92 | GCA_000344685.1 | JGI                                                                              |
| 1147 | <i>Pholiota microspora</i>            | Agarico  | Basidio | 29 | 10 | 11 | 42 | 92 | GCA_003314615.1 | Kunming University of Science and Technology                                     |
| 1148 | <i>Lecanicillium fungicola</i>        | Sordario | Asco    | 34 | 12 | 5  | 40 | 91 | GCA_900169235.1 | UNIVERSITY OF BRISTOL                                                            |
| 1149 | <i>Mytilinidion resinicola</i>        | Dothideo | Asco    | 27 | 14 | 10 | 40 | 91 | GCA_010093595.1 | DOE Joint Genome Institute                                                       |
| 1150 | <i>Penicillium carneum</i>            | Eurotio  | Asco    | 32 | 25 | 8  | 26 | 91 | GCA_000577495.1 | INRA-LIPM                                                                        |
| 1151 | <i>Cyphellophora europaea</i>         | Eurotio  | Asco    | 28 | 10 | 18 | 35 | 91 | GCA_000365145.2 | Broad Institute                                                                  |
| 1152 | <i>Ophiostoma piceae</i>              | Sordario | Asco    | 30 | 26 | 13 | 22 | 91 | GCA_000410735.1 | University of British Columbia                                                   |
| 1153 | <i>Choiromyces venosus</i>            | Pezizo   | Asco    | 29 | 30 | 10 | 22 | 91 | GCA_003788595.2 | DOE Joint Genome Institute                                                       |
| 1154 | <i>Aspergillus glaucus</i>            | Eurotio  | Asco    | 28 | 28 | 8  | 27 | 91 | GCA_001890805.1 | DOE Joint Genome Institute                                                       |
| 1155 | <i>Teratosphaeria pseudoeucalypti</i> | Dothideo | Asco    | 22 | 32 | 10 | 26 | 90 | GCA_013403795.1 | University of Pretoria                                                           |
| 1156 | <i>Penicillium roqueforti</i>         | Eurotio  | Asco    | 30 | 25 | 10 | 25 | 90 | GCA_001599855.1 | RIKEN Center for Life Science Technologies, Division of Genomic Technologies     |
| 1157 | <i>Zymoseptoria pseudotritici</i>     | Dothideo | Asco    | 30 | 24 | 16 | 20 | 90 | GCA_000223685.2 | University of Aarhus, Bioinformatics Research Center                             |
| 1158 | <i>Athelia rolfsii</i>                | Agarico  | Basidio | 20 | 32 | 18 | 20 | 90 | GCA_002940785.1 | Southwest University                                                             |
| 1159 | <i>Termitomyces sp. MG145</i>         | Agarico  | Basidio | 26 | 9  | 20 | 35 | 90 | GCA_003313055.1 | Kunming University of Science and Technology                                     |
| 1160 | <i>Podosphaera xanthii</i>            | Leotio   | Asco    | 24 | 21 | 8  | 36 | 89 | GCA_010015925.1 | National Academy of Agricultural Science, Rural Development Administration       |
| 1161 | <i>Dicyma pulvinata</i>               | Sordario | Asco    | 26 | 30 | 13 | 20 | 89 | GCA_006538405.1 | National Agriculture and Food Research Organization                              |
| 1162 | <i>Lecanosticta acicola</i>           | Dothideo | Asco    | 24 | 21 | 12 | 32 | 89 | GCA_002441625.1 | Mississippi State University                                                     |
| 1163 | <i>Zymoseptoria tritici</i>           | Dothideo | Asco    | 30 | 23 | 14 | 22 | 89 | GCA_900184105.1 | ETH                                                                              |
| 1164 | <i>Teratosphaeria destructans</i>     | Dothideo | Asco    | 23 | 31 | 11 | 24 | 89 | GCA_010367415.1 | Forestry and Agricultural Biotechnology Institute (FABI), University of Pretoria |
| 1165 | <i>Zymoseptoria brevis</i>            | Dothideo | Asco    | 30 | 24 | 15 | 20 | 89 | GCA_000966595.1 | Christian-Albrechts University of Kiel                                           |
| 1166 | <i>Penicillium zonata</i>             | Eurotio  | Asco    | 24 | 34 | 10 | 21 | 89 | GCA_001890105.1 | DOE Joint Genome Institute                                                       |
| 1167 | <i>Penicillium paneum</i>             | Eurotio  | Asco    | 30 | 24 | 10 | 24 | 88 | GCA_000577715.1 | INRA-LIPM                                                                        |
| 1168 | <i>Exophiala xenobiotica</i>          | Eurotio  | Asco    | 20 | 19 | 13 | 36 | 88 | GCA_000835505.1 | Broad Institute                                                                  |
| 1169 | <i>Baudoinia panamericana</i>         | Dothideo | Asco    | 25 | 20 | 19 | 24 | 88 | GCA_000338955.1 | JGI                                                                              |
| 1170 | <i>Termitomyces sp. J132</i>          | Agarico  | Basidio | 26 | 8  | 22 | 32 | 88 | GCA_001263195.1 | BGI                                                                              |
| 1171 | <i>Termitomyces sp. MG148</i>         | Agarico  | Basidio | 27 | 17 | 15 | 29 | 88 | GCA_003313785.1 | Kunming University of Science and Technology                                     |
| 1172 | <i>Aspergillus tanneri</i>            | Eurotio  | Asco    | 30 | 22 | 4  | 31 | 87 | GCA_003426965.1 | JCVI                                                                             |



|      |                                      |          |         |    |    |    |    |    |                 |                                                                                    |
|------|--------------------------------------|----------|---------|----|----|----|----|----|-----------------|------------------------------------------------------------------------------------|
| 1173 | <i>Cladosporiaceae sp. IMV 00236</i> | Dothideo | Asco    | 20 | 26 | 10 | 31 | 87 | GCA_001931875.2 | Jet Propulsion Laboratory,<br>California Institute of<br>Technology                |
| 1174 | <i>Epichloe uncinata</i>             | Sordario | Asco    | 26 | 15 | 16 | 29 | 86 | GCA_001043855.1 | University of Kentucky                                                             |
| 1175 | <i>Trichoderma arundinaceum</i>      | Sordario | Asco    | 32 | 14 | 22 | 18 | 86 | GCA_003012105.1 | USDA, ARS, NCAUR                                                                   |
| 1176 | <i>Epichloe glyceriae</i>            | Sordario | Asco    | 18 | 30 | 24 | 14 | 86 | GCA_000225285.2 | University of Kentucky, Dept of<br>Plant Pathology                                 |
| 1177 | <i>Trichoderma pleuroti</i>          | Sordario | Asco    | 33 | 14 | 20 | 19 | 86 | GCA_001721665.1 | University of Pecc                                                                 |
| 1178 | <i>Zymoseptoria ardabiliae</i>       | Dothideo | Asco    | 30 | 20 | 16 | 20 | 86 | GCA_000223765.2 | University of Aarhus,<br>Bioinformatics Research Center                            |
| 1179 | <i>Exutisphaerella laricina</i>      | Dothideo | Asco    | 26 | 20 | 14 | 26 | 86 | GCA_000504385.2 | Canada's Michael Smith<br>Genome Sciences Centre                                   |
| 1180 | <i>Phialophora attinorum</i>         | Eurotio  | Asco    | 27 | 12 | 16 | 31 | 86 | GCA_001299255.1 | CBS-KNAW Fungal Biodiversity<br>Centre                                             |
| 1181 | <i>Trichodelitschia bisporula</i>    | Dothideo | Asco    | 21 | 28 | 10 | 27 | 86 | GCA_010356995.1 | DOE Joint Genome Institute                                                         |
| 1182 | <i>Phialophora verrucosa</i>         | Eurotio  | Asco    | 22 | 14 | 14 | 36 | 86 | GCA_002099365.1 | Peking University First Hospital                                                   |
| 1183 | <i>Periglandula ipomoeae</i>         | Sordario | Asco    | 26 | 23 | 18 | 18 | 85 | GCA_000222875.2 | University of Kentucky, Dept of<br>Plant Pathology                                 |
| 1184 | <i>Exophiala oligosperma</i>         | Eurotio  | Asco    | 20 | 10 | 13 | 42 | 85 | GCA_000835515.1 | Broad Institute                                                                    |
| 1185 | <i>Exophiala lecanii-corni</i>       | Eurotio  | Asco    | 28 | 20 | 9  | 28 | 85 | GCA_003955835.1 | Naval Research Laboratory<br>CBS-KNAW Fungal Biodiversity<br>Centre                |
| 1186 | <i>Phlebia centrifuga</i>            | Agarico  | Basidio | 26 | 7  | 14 | 38 | 85 | GCA_001913855.2 | Institute of the Royal<br>Netherlands Academy of Arts<br>and Science               |
| 1187 | <i>Gymnopilus junonius</i>           | Agarico  | Basidio | 26 | 3  | 14 | 42 | 85 | GCA_900068935.1 | Royal Botanic Gardens, Kew                                                         |
| 1188 | <i>Myriangium duriaei</i>            | Dothideo | Asco    | 22 | 22 | 14 | 26 | 84 | GCA_010093895.1 | DOE Joint Genome Institute                                                         |
| 1189 | <i>Apiotrichum porosum</i>           | Tremello | Basidio | 22 | 32 | 12 | 18 | 84 | GCA_003942205.1 | Karlsruhe Institute of<br>Technology                                               |
| 1190 | <i>Termitomyces sp. JCM 13351</i>    | Agarico  | Basidio | 24 | 10 | 20 | 30 | 84 | GCA_001972325.1 | RIKEN Center for Life Science<br>Technologies, Division of<br>Genomic Technologies |
| 1191 | <i>Trichoderma brevicompactum</i>    | Sordario | Asco    | 32 | 11 | 22 | 18 | 83 | GCA_003012085.1 | USDA, ARS, NCAUR                                                                   |
| 1192 | <i>Raffaelea quercivora</i>          | Sordario | Asco    | 27 | 24 | 8  | 24 | 83 | GCA_002778125.1 | University of Montana                                                              |
| 1193 | <i>Raffaelea quercus-mongolicae</i>  | Sordario | Asco    | 28 | 21 | 8  | 26 | 83 | GCA_002215975.1 | Seoul National University                                                          |
| 1194 | <i>Cenococcum geophilum</i>          | Dothideo | Asco    | 27 | 14 | 10 | 32 | 83 | GCA_001692895.1 | DOE Joint Genome Institute                                                         |
| 1195 | <i>Fonsecaea multimorphosa</i>       | Eurotio  | Asco    | 23 | 10 | 12 | 38 | 83 | GCA_000836435.1 | Broad Institute                                                                    |
| 1196 | <i>Termitomyces eurrhizus</i>        | Agarico  | Basidio | 25 | 8  | 14 | 36 | 83 | GCA_003316525.1 | Kunming University of Science<br>and Technology                                    |
| 1197 | <i>Knoxdaviesia capensis</i>         | Sordario | Asco    | 32 | 6  | 21 | 23 | 82 | GCA_001510575.1 | University of Stellenbosch                                                         |
| 1198 | <i>Simplicillium aogashimaense</i>   | Sordario | Asco    | 26 | 16 | 13 | 26 | 81 | GCA_012273805.1 | AgResearch                                                                         |
| 1199 | <i>Fomitopsis rosea</i>              | Agarico  | Basidio | 24 | 18 | 14 | 25 | 81 | GCA_004679265.1 | IHI Zittau / TU Dresden                                                            |
| 1200 | <i>Mycosphaerella sp. Ston1</i>      | Dothideo | Asco    | 22 | 26 | 7  | 26 | 81 | GCA_000504405.2 | Canada's Michael Smith<br>Genome Sciences Centre                                   |

|      |                                     |            |         |    |    |    |    |    |                 |                                                                                    |
|------|-------------------------------------|------------|---------|----|----|----|----|----|-----------------|------------------------------------------------------------------------------------|
| 1201 | <i>Fusarium ventricosum</i>         | Sordario   | Asco    | 24 | 24 | 10 | 23 | 81 | GCA_013623725.1 | US Department of Agriculture,<br>Agriculture Research Service                      |
| 1202 | <i>Cladophialophora psammophila</i> | Eurotio    | Asco    | 20 | 10 | 11 | 40 | 81 | GCA_000585535.1 | Broad Institute                                                                    |
| 1203 | <i>Laetiporus sulphureus</i>        | Agarico    | Basidio | 26 | 15 | 14 | 26 | 81 | GCA_001632365.1 | DOE Joint Genome Institute                                                         |
| 1204 | <i>Geosmithia putterillii</i>       | Sordario   | Asco    | 28 | 18 | 10 | 24 | 80 | GCA_900188575.1 | UNIVERSITY OF NEW<br>HAMPSHIRE                                                     |
| 1205 | <i>Arthonia radiata</i>             | Arthonio   | Asco    | 22 | 23 | 18 | 17 | 80 | GCA_002989075.1 | Stanford University                                                                |
| 1206 | <i>Thielaviopsis ethacetica</i>     | Sordario   | Asco    | 27 | 18 | 18 | 17 | 80 | GCA_001599055.1 | RIKEN Center for Life Science<br>Technologies, Division of<br>Genomic Technologies |
| 1207 | <i>Sanghuangporus sanghuang</i>     | Agarico    | Basidio | 26 | 5  | 8  | 41 | 80 | GCA_009806525.1 | Anhui Provincial Key Laboratory<br>of Microbial Pest Control                       |
| 1208 | <i>Lepiota venenata</i>             | Agarico    | Basidio | 25 | 8  | 9  | 38 | 80 | GCA_004296355.1 | Kunming Institute of Botany                                                        |
| 1209 | <i>Lecanicillium psalliotae</i>     | Sordario   | Asco    | 26 | 16 | 9  | 28 | 79 | GCA_002796755.1 | Western Sydney University                                                          |
| 1210 | <i>Aeminium ludgeri</i>             | Dothideo   | Asco    | 22 | 30 | 16 | 11 | 79 | GCA_004216415.1 | Centre for Functional Diversity                                                    |
| 1211 | <i>Grosmannia penicillata</i>       | Sordario   | Asco    | 23 | 26 | 8  | 22 | 79 | GCA_002778075.1 | University of Montana                                                              |
| 1212 | <i>Leptographium lundbergii</i>     | Sordario   | Asco    | 24 | 28 | 6  | 21 | 79 | GCA_001455505.1 | University of Pretoria                                                             |
| 1213 | <i>Megacollybia marginata</i>       | Agarico    | Basidio | 26 | 8  | 9  | 36 | 79 | GCA_003313965.1 | Kunming University of Science<br>and Technology                                    |
| 1214 | <i>Purpureocillium lilacinum</i>    | Sordario   | Asco    | 23 | 16 | 12 | 27 | 78 | GCA_001468795.1 | The Energy and Resources<br>Institute                                              |
| 1215 | <i>Moniliella sp. 'wahieum'</i>     | Moniliello | Basidio | 18 | 12 | 0  | 48 | 78 | GCA_003971905.1 | Kyungpook National University                                                      |
| 1216 | <i>Trichoderma sp. TW21990_1</i>    | Sordario   | Asco    | 26 | 12 | 24 | 16 | 78 | GCA_010015515.1 | The University of Adelaide                                                         |
| 1217 | <i>Exophiala aquamarina</i>         | Eurotio    | Asco    | 24 | 12 | 8  | 34 | 78 | GCA_000709125.1 | Broad Institute                                                                    |
| 1218 | <i>Apiotrichum akiyoshidainum</i>   | Tremello   | Basidio | 22 | 15 | 18 | 23 | 78 | GCA_002973495.1 | PROIMI - CONICET                                                                   |
| 1219 | <i>Phyllachora maydis</i>           | Sordario   | Asco    | 19 | 24 | 14 | 21 | 78 | GCA_011801745.1 | Purdue University, Botany and<br>Plant Pathology                                   |
| 1220 | <i>Knoxdaviesia proteae</i>         | Sordario   | Asco    | 30 | 8  | 19 | 21 | 78 | GCA_001510565.1 | University of Stellenbosch                                                         |
| 1221 | <i>Cantharellus cibarius</i>        | Agarico    | Basidio | 18 | 26 | 22 | 11 | 77 | GCA_003521295.1 | Kunming University of Science<br>and Technology                                    |
| 1222 | <i>Trichoderma parareesei</i>       | Sordario   | Asco    | 24 | 12 | 24 | 17 | 77 | GCA_001050175.1 | Vienna University of<br>Technology                                                 |
| 1223 | <i>Geosmithia flava</i>             | Sordario   | Asco    | 28 | 20 | 6  | 23 | 77 | GCA_900188565.1 | UNIVERSITY OF NEW<br>HAMPSHIRE                                                     |
| 1224 | <i>Sphaerulina musiva</i>           | Dothideo   | Asco    | 21 | 27 | 6  | 23 | 77 | GCA_000320565.2 | JGI                                                                                |
| 1225 | <i>Leptographium procerum</i>       | Sordario   | Asco    | 28 | 24 | 2  | 23 | 77 | GCA_000806385.1 | University of Pretoria                                                             |
| 1226 | <i>Mycosphaerella sp. PB-2012b</i>  | Dothideo   | Asco    | 21 | 25 | 7  | 23 | 76 | GCA_002116345.1 | Canada's Michael Smith<br>Genome Sciences Centre                                   |
| 1227 | <i>Zymoseptoria passerinii</i>      | Dothideo   | Asco    | 26 | 18 | 16 | 16 | 76 | GCA_000223825.2 | University of Aarhus,<br>Bioinformatics Research Center                            |
| 1228 | <i>Apiotrichum laibachii</i>        | Tremello   | Basidio | 20 | 18 | 18 | 20 | 76 | GCA_001600735.1 | RIKEN Center for Life Science<br>Technologies, Division of<br>Genomic Technologies |

|      |                                     |          |         |    |    |    |    |    |                 |                                                                              |
|------|-------------------------------------|----------|---------|----|----|----|----|----|-----------------|------------------------------------------------------------------------------|
| 1229 | <i>Grosmannia clavigera</i>         | Sordario | Asco    | 26 | 24 | 4  | 22 | 76 | GCA_000143105.2 | Michael Smith Laboratories at UBC                                            |
| 1230 | <i>Thielaviopsis euricoi</i>        | Sordario | Asco    | 25 | 19 | 15 | 17 | 76 | GCA_001599615.1 | RIKEN Center for Life Science Technologies, Division of Genomic Technologies |
| 1231 | <i>Omphalotus olearius</i>          | Agarico  | Basidio | 25 | 6  | 7  | 38 | 76 | GCA_000296255.1 | University of Minnesota                                                      |
| 1232 | <i>Trichoderma reesei</i>           | Sordario | Asco    | 24 | 10 | 24 | 17 | 75 | GCA_000167675.2 | DOE Joint Genome Institute                                                   |
| 1233 | <i>Exophiala sideris</i>            | Eurotio  | Asco    | 20 | 16 | 11 | 28 | 75 | GCA_000835395.1 | Broad Institute                                                              |
| 1234 | <i>Sanghuangporus baumii</i>        | Agarico  | Basidio | 22 | 8  | 10 | 35 | 75 | GCA_001481415.2 | China University of Petroleum                                                |
| 1235 | <i>Aspergillus sp. HF37</i>         | Eurotio  | Asco    | 26 | 20 | 12 | 16 | 74 | GCA_003698115.1 | University of Natural Resources and Life Sciences, Vienna                    |
| 1236 | <i>Cladophialophora bantiana</i>    | Eurotio  | Asco    | 20 | 8  | 10 | 36 | 74 | GCA_000835475.1 | Broad Institute                                                              |
| 1237 | <i>Byssochlamys spectabilis</i>     | Eurotio  | Asco    | 16 | 20 | 10 | 28 | 74 | GCA_003990805.1 | Kweichow moutai Co.,Ltd.                                                     |
| 1238 | <i>Sphaerosporella brunnea</i>      | Pezizo   | Asco    | 23 | 19 | 12 | 20 | 74 | GCA_008704415.1 | DOE Joint Genome Institute                                                   |
| 1239 | <i>Infundibulicybe gibba</i>        | Agarico  | Basidio | 25 | 8  | 5  | 36 | 74 | GCA_900068925.1 | Royal Botanic Gardens, Kew                                                   |
| 1240 | <i>Tolypocladium sp. Sup5 PDA-1</i> | Sordario | Asco    | 26 | 12 | 8  | 27 | 73 | GCA_000750105.3 | OMRF                                                                         |
| 1241 | <i>Trichoderma longibrachiatum</i>  | Sordario | Asco    | 23 | 10 | 24 | 16 | 73 | GCA_000332775.1 | Shandong University                                                          |
| 1242 | <i>Trichoderma koningii</i>         | Sordario | Asco    | 23 | 10 | 24 | 16 | 73 | GCA_001950475.1 | RIKEN Center for Life Science Technologies, Division of Genomic Technologies |
| 1243 | <i>Verruconis gallopava</i>         | Dothideo | Asco    | 17 | 20 | 6  | 30 | 73 | GCA_000836295.1 | Broad Institute                                                              |
| 1244 | <i>Lecanicillium sp. MT-2017a</i>   | Sordario | Asco    | 22 | 17 | 11 | 22 | 72 | GCA_003056605.1 | Northern Arizona University                                                  |
| 1245 | <i>Lepidopterella palustris</i>     | Dothideo | Asco    | 18 | 15 | 6  | 33 | 72 | GCA_001692735.1 | DOE Joint Genome Institute                                                   |
| 1246 | <i>Daedalea quercina</i>            | Agarico  | Basidio | 21 | 13 | 16 | 22 | 72 | GCA_001632345.1 | DOE Joint Genome Institute                                                   |
| 1247 | <i>Pascua guehoae</i>               | Tremello | Basidio | 20 | 14 | 16 | 22 | 72 | GCA_001600415.1 | RIKEN Center for Life Science Technologies, Division of Genomic Technologies |
| 1248 | <i>Fonsecaea erecta</i>             | Eurotio  | Asco    | 21 | 9  | 12 | 30 | 72 | GCA_001651985.1 | Federal University of Parana                                                 |
| 1249 | <i>Postia placenta</i>              | Agarico  | Basidio | 26 | 14 | 10 | 22 | 72 | GCA_002117355.1 | DOE Joint Genome Institute                                                   |
| 1250 | <i>Neolentinus lepideus</i>         | Agarico  | Basidio | 24 | 13 | 11 | 23 | 71 | GCA_001632425.1 | DOE Joint Genome Institute                                                   |
| 1251 | <i>Phialophora americana</i>        | Eurotio  | Asco    | 18 | 8  | 15 | 30 | 71 | GCA_000835435.1 | Broad Institute                                                              |
| 1252 | <i>Exophiala alcalophila</i>        | Eurotio  | Asco    | 21 | 6  | 12 | 32 | 71 | GCA_001599775.1 | RIKEN Center for Life Science Technologies, Division of Genomic Technologies |
| 1253 | <i>Malbranchea cinnamomea</i>       | Eurotio  | Asco    | 25 | 16 | 14 | 16 | 71 | GCA_900128795.2 | CHALMERS UNIVERSITY OF TECHNOLOGY                                            |
| 1254 | <i>Ophiostoma ips</i>               | Sordario | Asco    | 18 | 24 | 8  | 19 | 69 | GCA_002917055.1 | University of Pretoria                                                       |
| 1255 | <i>Apiotrichum gamsii</i>           | Tremello | Basidio | 19 | 23 | 9  | 18 | 69 | GCA_001600315.1 | RIKEN Center for Life Science Technologies, Division of Genomic Technologies |
| 1256 | <i>Fistulina hepatica</i>           | Agarico  | Basidio | 17 | 18 | 13 | 21 | 69 | GCA_000934395.1 | DOE Joint Genome Institute                                                   |
| 1257 | <i>Calocera cornea</i>              | Dacry    | Basidio | 20 | 14 | 17 | 18 | 69 | GCA_001632435.1 | DOE Joint Genome Institute                                                   |
| 1258 | <i>Penicillium decumbens</i>        | Eurotio  | Asco    | 16 | 20 | 7  | 26 | 69 | GCA_002072245.1 | Chalmers University of Technology                                            |

|      |                                      |               |         |    |    |    |    |    |                 |                                                                                                                                            |
|------|--------------------------------------|---------------|---------|----|----|----|----|----|-----------------|--------------------------------------------------------------------------------------------------------------------------------------------|
| 1259 | <i>Phellinidium pouzarii</i>         | Agarico       | Basidio | 21 | 6  | 8  | 34 | 69 | GCA_004802695.1 | IHI Zittau / TU Dresden                                                                                                                    |
| 1260 | <i>Thermoascus crustaceus</i>        | Eurotio       | Asco    | 20 | 14 | 11 | 23 | 68 | GCA_001599835.1 | RIKEN Center for Life Science<br>Technologies, Division of<br>Genomic Technologies                                                         |
| 1261 | <i>Cladophialophora carrionii</i>    | Eurotio       | Asco    | 16 | 12 | 14 | 26 | 68 | GCA_000365165.2 | Broad Institute                                                                                                                            |
| 1262 | <i>Pseudogymnoascus destructans</i>  | Leotio        | Asco    | 18 | 26 | 8  | 16 | 68 | GCA_001641265.1 | US Forest Service                                                                                                                          |
| 1263 | <i>Chiuva virens</i>                 | Agarico       | Basidio | 16 | 8  | 6  | 38 | 68 | GCA_003316485.1 | Kunming University of Science<br>and Technology                                                                                            |
| 1264 | <i>Metarhizium majus</i>             | Sordario      | Asco    | 24 | 7  | 6  | 30 | 67 | GCA_000814945.1 | Shanghai Insititutes for<br>Biological Sciences, CAS                                                                                       |
| 1265 | <i>Microcyclospora tardicrescens</i> | Dothideo      | Asco    | 16 | 13 | 14 | 24 | 67 | GCA_003012245.1 | USDA, ARS, NCAUR                                                                                                                           |
| 1266 | <i>Thielaviopsis punctulata</i>      | Sordario      | Asco    | 22 | 16 | 12 | 17 | 67 | GCA_002925815.1 | Forestry and Agricultural<br>Biotechnology Institute<br>RIKEN Center for Life Science<br>Technologies, Division of<br>Genomic Technologies |
| 1267 | <i>Trichosporon coremiiforme</i>     | Tremello      | Basidio | 17 | 8  | 6  | 35 | 66 | GCA_001752605.1 | University of Pretoria                                                                                                                     |
| 1268 | <i>Grosmannia galeiformis</i>        | Sordario      | Asco    | 21 | 16 | 5  | 24 | 66 | GCA_004028395.1 | Federal University of Parana                                                                                                               |
| 1269 | <i>Fonsecaea nubica</i>              | Eurotio       | Asco    | 18 | 8  | 10 | 30 | 66 | GCA_001646965.1 | DOE Joint Genome Institute                                                                                                                 |
| 1270 | <i>Calocera viscosa</i>              | Dacry         | Basidio | 20 | 12 | 15 | 19 | 66 | GCA_001630345.1 | RIKEN Center for Life Science<br>Technologies, Division of<br>Genomic Technologies                                                         |
| 1271 | <i>Apiotrichum veenhuisii</i>        | Tremello      | Basidio | 16 | 15 | 15 | 20 | 66 | GCA_001600595.1 | Broad Institute                                                                                                                            |
| 1272 | <i>Cladophialophora yegresii</i>     | Eurotio       | Asco    | 15 | 11 | 12 | 28 | 66 | GCA_000585515.1 | Metarhizium genome<br>sequencing Consortium                                                                                                |
| 1273 | <i>Metarhizium robertsii</i>         | Sordario      | Asco    | 22 | 7  | 6  | 30 | 65 | GCA_000187425.2 | University of British Columbia                                                                                                             |
| 1274 | <i>Mycosphaerella populicola</i>     | Dothideo      | Asco    | 18 | 22 | 5  | 20 | 65 | GCA_000291705.1 | DOE Joint Genome Institute                                                                                                                 |
| 1275 | <i>Eremomyces bilateralis</i>        | Dothideo      | Asco    | 15 | 16 | 12 | 22 | 65 | GCA_010015585.1 | Kunming University of Science<br>and Technology                                                                                            |
| 1276 | <i>Boletus edulis</i>                | Agarico       | Basidio | 17 | 4  | 10 | 34 | 65 | GCA_003316165.1 | Universidade Estadual de<br>Campinas (UNICAMP), Brazil                                                                                     |
| 1277 | <i>Moniliophthora perniciosa</i>     | Agarico       | Basidio | 15 | 12 | 10 | 28 | 65 | GCA_000183025.1 | Shanghai Insititutes for<br>Biological Sciences, CAS                                                                                       |
| 1278 | <i>Metarhizium guizhouense</i>       | Sordario      | Asco    | 23 | 7  | 6  | 28 | 64 | GCA_000814955.1 | Gujarat Biotechnology Research<br>Centre                                                                                                   |
| 1279 | <i>Dirinaria sp. GBRC AP01</i>       | Lecanoro      | Asco    | 25 | 4  | 5  | 30 | 64 | GCA_013315955.1 | Kunming University of Science<br>and Technology                                                                                            |
| 1280 | <i>Lactarius sp. MG50</i>            | Agarico       | Basidio | 16 | 0  | 1  | 47 | 64 | GCA_003314065.1 | University of Ottawa                                                                                                                       |
| 1281 | <i>Basidioascus undulatus</i>        | Geminibasidio | Basidio | 18 | 12 | 5  | 29 | 64 | GCA_000826855.1 | FEDERAL UNIVERSITY OF<br>PARANA                                                                                                            |
| 1282 | <i>Fonsecaea pugnacius</i>           | Eurotio       | Asco    | 16 | 8  | 10 | 30 | 64 | GCA_011800825.1 | Broad Institute                                                                                                                            |
| 1283 | <i>Rhinocladiella mackenziei</i>     | Eurotio       | Asco    | 17 | 13 | 8  | 26 | 64 | GCA_000835555.1 | University of Pretoria                                                                                                                     |
| 1284 | <i>Thielaviopsis musarum</i>         | Sordario      | Asco    | 22 | 14 | 12 | 16 | 64 | GCA_001513885.1 | Technische Universitat<br>Munchen - WZW                                                                                                    |
| 1285 | <i>Ustilago trichophora</i>          | Ustilagino    | Basidio | 16 | 16 | 5  | 26 | 63 | GCA_900323505.1 |                                                                                                                                            |

|      |                                       |            |         |    |    |    |    |    |                 |                                                                         |
|------|---------------------------------------|------------|---------|----|----|----|----|----|-----------------|-------------------------------------------------------------------------|
| 1286 | <i>Raffaelea sulphurea</i>            | Sordario   | Asco    | 24 | 17 | 3  | 19 | 63 | GCA_002778055.1 | University of Montana                                                   |
| 1287 | <i>Fonsecaea pedrosoi</i>             | Eurotio    | Asco    | 16 | 7  | 10 | 30 | 63 | GCA_000835455.1 | Broad Institute                                                         |
| 1288 | <i>Exophiala spinifera</i>            | Eurotio    | Asco    | 18 | 6  | 11 | 28 | 63 | GCA_010882955.1 | Research Center for Medical Mycology - Peking University First Hospital |
| 1289 | <i>Knufia petricola</i>               | Eurotio    | Asco    | 18 | 18 | 7  | 20 | 63 | GCA_002319055.1 | University of Natural Resources and Life Sciences                       |
| 1290 | <i>Davidsoniella eucalypti</i>        | Sordario   | Asco    | 17 | 21 | 6  | 19 | 63 | GCA_004009845.1 | Forestry and Agricultural Biotechnology Institute                       |
| 1291 | <i>Akanthomyces lecanii</i>           | Sordario   | Asco    | 19 | 13 | 8  | 22 | 62 | GCA_001636795.1 | Shanghai Institutes for Biological Sciences, CAS                        |
| 1292 | <i>Ramichloridium luteum</i>          | Dothideo   | Asco    | 15 | 9  | 12 | 26 | 62 | GCA_002368545.1 | Northwest A&F University                                                |
| 1293 | <i>Sporothrix phasma</i>              | Sordario   | Asco    | 24 | 10 | 10 | 18 | 62 | GCA_011037845.1 | University of Pretoria                                                  |
| 1294 | <i>Apiotrichum mycotoxinovorans</i>   | Tremello   | Basidio | 18 | 10 | 14 | 20 | 62 | GCA_013177335.1 | Nanjing TECH University                                                 |
| 1295 | <i>Exophiala sp.</i>                  | Eurotio    | Asco    | 20 | 14 | 8  | 20 | 62 | GCA_004026505.1 | Jill Banfield's Lab at Berkeley                                         |
| 1296 | <i>Calocybe gambosa</i>               | Agarico    | Basidio | 14 | 7  | 11 | 30 | 62 | GCA_900068965.1 | Royal Botanic Gardens, Kew                                              |
| 1297 | <i>Tolypocladium inflatum</i>         | Sordario   | Asco    | 20 | 8  | 9  | 24 | 61 | GCA_003945705.1 | University of Minnesota                                                 |
| 1298 | <i>Acaromyces ingoldii</i>            | Exobasidio | Basidio | 14 | 18 | 5  | 24 | 61 | GCA_003144295.1 | DOE Joint Genome Institute                                              |
| 1299 | <i>Eurotiomycetes sp.</i>             | Eurotio    | Asco    | 18 | 18 | 7  | 18 | 61 | GCA_002917005.1 | Jill Banfield's Lab at Berkeley                                         |
| 1300 | <i>Boletus sp. MG55</i>               | Agarico    | Basidio | 15 | 6  | 4  | 36 | 61 | GCA_003313885.1 | Kunming University of Science and Technology                            |
| 1301 | <i>Bretziella fagacearum</i>          | Sordario   | Asco    | 18 | 17 | 11 | 15 | 61 | GCA_002018255.1 | Forestry and Agricultural Biotechnology Institute                       |
| 1302 | <i>Termitomyces heimii</i>            | Agarico    | Basidio | 22 | 6  | 10 | 23 | 61 | GCA_003313675.1 | Kunming University of Science and Technology                            |
| 1303 | <i>Metarhizium anisopliae</i>         | Sordario   | Asco    | 21 | 6  | 6  | 27 | 60 | GCA_013305495.1 | Chonbuk National University                                             |
| 1304 | <i>Hirsutella minnesotensis</i>       | Sordario   | Asco    | 20 | 4  | 4  | 32 | 60 | GCA_000956045.1 | Institute of Microbiology, Chinese Academy of Sciences                  |
| 1305 | <i>Usnea hakonensis</i>               | Lecanoro   | Asco    | 23 | 4  | 1  | 32 | 60 | GCA_013423325.1 | Swedish Museum of Natural History                                       |
| 1306 | <i>Fonsecaea monophora</i>            | Eurotio    | Asco    | 16 | 6  | 8  | 30 | 60 | GCA_001642475.1 | Federal University of Parana                                            |
| 1307 | <i>Suillus luteus</i>                 | Agarico    | Basidio | 18 | 4  | 6  | 32 | 60 | GCA_000827255.1 | DOE Joint Genome Institute                                              |
| 1308 | <i>Torrubiella hemipterigena</i>      | Sordario   | Asco    | 18 | 14 | 7  | 20 | 59 | GCA_000825705.1 | HKI JENA                                                                |
| 1309 | <i>Paecilomyces hepiali</i>           | Sordario   | Asco    | 17 | 12 | 8  | 22 | 59 | GCA_001455915.2 | Beijing Normal University                                               |
| 1310 | <i>Hypomyces rosellus</i>             | Sordario   | Asco    | 24 | 4  | 11 | 20 | 59 | GCA_011799845.1 | Jilin Agricultural University                                           |
| 1311 | <i>Metarhizium brunneum</i>           | Sordario   | Asco    | 19 | 6  | 6  | 28 | 59 | GCA_000814965.1 | Shanghai Insitutes for Biological Sciences, CAS                         |
| 1312 | <i>Lentinula edodes</i>               | Agarico    | Basidio | 16 | 12 | 3  | 28 | 59 | GCA_001562095.1 | Chungbuk National University                                            |
| 1313 | <i>Megacollybia platyphylla</i>       | Agarico    | Basidio | 20 | 4  | 9  | 26 | 59 | GCA_900068915.1 | Royal Botanic Gardens, Kew                                              |
| 1314 | <i>Cordyceps javanica</i>             | Sordario   | Asco    | 18 | 12 | 8  | 20 | 58 | GCA_006981985.1 | The Institute of Vegetables and Flowers CAAS                            |
| 1315 | <i>Trichosporon ovoides</i>           | Tremello   | Basidio | 14 | 6  | 6  | 32 | 58 | GCA_009833065.1 | Heilongjiang bayi agricultural university                               |
| 1316 | <i>Tolypocladium sp. Salcha MEA-2</i> | Sordario   | Asco    | 19 | 8  | 9  | 22 | 58 | GCA_000750145.2 | INPART                                                                  |

|      |                                     |            |         |    |    |    |    |    |                 |                                                                                    |
|------|-------------------------------------|------------|---------|----|----|----|----|----|-----------------|------------------------------------------------------------------------------------|
| 1317 | <i>Exophiala mesophila</i>          | Eurotio    | Asco    | 24 | 3  | 6  | 25 | 58 | GCA_000836275.1 | Broad Institute                                                                    |
| 1318 | <i>Wolfiporia cocos</i>             | Agarico    | Basidio | 16 | 12 | 14 | 16 | 58 | GCA_000344635.1 | DOE Joint Genome Institute                                                         |
| 1319 | <i>Davidsoniella neocaledoniae</i>  | Sordario   | Asco    | 18 | 17 | 6  | 17 | 58 | GCA_009806295.1 | Forestry and Agricultural<br>Biotechnology Institute                               |
| 1320 | <i>Davidsoniella australis</i>      | Sordario   | Asco    | 17 | 17 | 7  | 17 | 58 | GCA_009806335.1 | Forestry and Agricultural<br>Biotechnology Institute                               |
| 1321 | <i>Davidsoniella virescens</i>      | Sordario   | Asco    | 18 | 19 | 6  | 15 | 58 | GCA_001513805.1 | University of Pretoria, Forestry<br>and Agricultural Biotechnology<br>Institute    |
| 1322 | <i>Suillus pictus</i>               | Agarico    | Basidio | 20 | 2  | 6  | 30 | 58 | GCA_003313085.1 | Kunming University of Science<br>and Technology                                    |
| 1323 | <i>Suillus alpinus</i>              | Agarico    | Basidio | 15 | 4  | 5  | 34 | 58 | GCA_003316505.1 | Kunming University of Science<br>and Technology                                    |
| 1324 | <i>Auricularia polytricha</i>       | Agarico    | Basidio | 16 | 2  | 6  | 34 | 58 | GCA_003316125.1 | Kunming University of Science<br>and Technology                                    |
| 1325 | <i>Cordyceps farinosa</i>           | Sordario   | Asco    | 17 | 12 | 8  | 20 | 57 | GCA_000733625.1 | CSIR- Institute of Microbial<br>technology (IMTECH)                                |
| 1326 | <i>Geosmithia morbida</i>           | Sordario   | Asco    | 19 | 16 | 5  | 17 | 57 | GCA_900108815.1 | UNIVERSITY OF NEW<br>HAMPSHIRE                                                     |
| 1327 | <i>Cutaneotrichosporon dermatis</i> | Tremello   | Basidio | 14 | 16 | 11 | 16 | 57 | GCA_003116895.1 | RIKEN Center for Life Science<br>Technologies, Division of<br>Genomic Technologies |
| 1328 | <i>Prillingeria fragicola</i>       | Tremello   | Basidio | 14 | 13 | 12 | 18 | 57 | GCA_002335605.1 | RIKEN Center for Life Science<br>Technologies, Division of<br>Genomic Technologies |
| 1329 | <i>Rhizopus oryzae</i>              | Mucoro     | Mucoro  | 16 | 24 | 0  | 16 | 56 | GCA_000697195.1 | IGS                                                                                |
| 1330 | <i>Evernia prunastri</i>            | Lecanoro   | Asco    | 20 | 3  | 2  | 31 | 56 | GCA_003184365.1 | Senckenberg                                                                        |
| 1331 | <i>Lactarius indigo</i>             | Agarico    | Basidio | 16 | 2  | 2  | 36 | 56 | GCA_003313985.1 | Kunming University of Science<br>and Technology                                    |
| 1332 | <i>Dacryopinax primogenitus</i>     | Dacry      | Basidio | 17 | 8  | 14 | 17 | 56 | GCA_000292625.1 | DOE Joint Genome Institute                                                         |
| 1333 | <i>Albatrellus ellisii</i>          | Agarico    | Basidio | 12 | 4  | 6  | 34 | 56 | GCA_003314395.1 | Kunming University of Science<br>and Technology                                    |
| 1334 | <i>Suillus brevipes</i>             | Agarico    | Basidio | 18 | 2  | 4  | 32 | 56 | GCA_011800875.1 | DOE Joint Genome Institute                                                         |
| 1335 | <i>Agaricus bisporus</i>            | Agarico    | Basidio | 16 | 2  | 8  | 30 | 56 | GCA_008271545.1 | Jilin Agricultural University                                                      |
| 1336 | <i>Pterula multifida</i>            | Agarico    | Basidio | 12 | 8  | 6  | 30 | 56 | GCA_900068985.1 | Royal Botanic Gardens, Kew                                                         |
| 1337 | <i>Moesziomyces sp. F16C1</i>       | Ustilagino | Basidio | 14 | 13 | 10 | 18 | 55 | GCA_003004725.1 | Universidade de Sao Paulo                                                          |
| 1338 | <i>Lactarius hatsudake</i>          | Agarico    | Basidio | 16 | 2  | 1  | 36 | 55 | GCA_003315955.1 | Kunming University of Science<br>and Technology                                    |
| 1339 | <i>Berkeleyomyces basicola</i>      | Sordario   | Asco    | 15 | 19 | 6  | 15 | 55 | GCA_003671435.1 | Forestry and Agricultural<br>Biotechnology Institute                               |
| 1340 | <i>Huntiaella moniliformis</i>      | Sordario   | Asco    | 16 | 14 | 5  | 20 | 55 | GCA_000712465.1 | Forestry and Agricultural<br>Biotechnology Institute                               |
| 1341 | <i>Gomphus sp. MG54</i>             | Agarico    | Basidio | 10 | 0  | 0  | 45 | 55 | GCA_003314385.1 | Kunming University of Science<br>and Technology                                    |

|      |                                       |                |           |    |    |    |    |    |                 |                                                                                                                                                                                                                                                                                                                                                                                                                                                                                                                                                                                                                                                                                                                                                                                                                                                                                                                                                                                                                                                                                                            |
|------|---------------------------------------|----------------|-----------|----|----|----|----|----|-----------------|------------------------------------------------------------------------------------------------------------------------------------------------------------------------------------------------------------------------------------------------------------------------------------------------------------------------------------------------------------------------------------------------------------------------------------------------------------------------------------------------------------------------------------------------------------------------------------------------------------------------------------------------------------------------------------------------------------------------------------------------------------------------------------------------------------------------------------------------------------------------------------------------------------------------------------------------------------------------------------------------------------------------------------------------------------------------------------------------------------|
| 1342 | <i>Coprinus comatus</i>               | Agarico        | Basidio   | 19 | 4  | 9  | 23 | 55 | GCA_003316025.1 | Kunming University of Science and Technology<br>National Institute of Horticultural and Herbal Science, Rural Development Administration<br>Institute of Microbial Technology<br>Broad Institute<br>Broad Institute<br>IGS<br>Research Center for Medical Mycology - Peking University First Hospital<br>Forest Products, Mississippi State University<br>DOE Joint Genome Institute<br>DOE Joint Genome Institute<br>Jilin Agricultural University<br>National Institute of Horticultural and Herbal Science, Rural Development Administration<br>IGS<br>Chinese Academy of Sciences<br>Seoul National University<br>RIKEN Center for Life Science Technologies, Division of Genomic Technologies<br>DOE Joint Genome Institute<br>Kunming University of Science and Technology<br>Kunming University of Science and Technology<br>Anhui Agricultural University<br>Research Center for Medical Mycology - Peking University First Hospital<br>Universidade de Sao Paulo<br>Senckenberg<br>Lake Superior State University<br>RIKEN Center for Life Science Technologies, Division of Genomic Technologies |
| 1343 | <i>Beauveria pseudobassiana</i>       | Sordario       | Asco      | 20 | 8  | 2  | 24 | 54 | GCA_003267905.1 |                                                                                                                                                                                                                                                                                                                                                                                                                                                                                                                                                                                                                                                                                                                                                                                                                                                                                                                                                                                                                                                                                                            |
| 1344 | <i>Hirsutella thompsonii</i>          | Sordario       | Asco      | 17 | 4  | 4  | 29 | 54 | GCA_000472145.1 |                                                                                                                                                                                                                                                                                                                                                                                                                                                                                                                                                                                                                                                                                                                                                                                                                                                                                                                                                                                                                                                                                                            |
| 1345 | <i>Rhizopus delemar</i>               | Mucoro         | Mucoro    | 13 | 25 | 0  | 16 | 54 | GCA_000149305.1 |                                                                                                                                                                                                                                                                                                                                                                                                                                                                                                                                                                                                                                                                                                                                                                                                                                                                                                                                                                                                                                                                                                            |
| 1346 | <i>Coniosporium apollinis</i>         | Dothideo       | Asco      | 17 | 12 | 4  | 21 | 54 | GCA_000281105.1 |                                                                                                                                                                                                                                                                                                                                                                                                                                                                                                                                                                                                                                                                                                                                                                                                                                                                                                                                                                                                                                                                                                            |
| 1347 | <i>Rhizopus stolonifer</i>            | Mucoro         | Mucoro    | 12 | 26 | 1  | 15 | 54 | GCA_000697035.1 |                                                                                                                                                                                                                                                                                                                                                                                                                                                                                                                                                                                                                                                                                                                                                                                                                                                                                                                                                                                                                                                                                                            |
| 1348 | <i>Exophiala dermatitidis</i>         | Eurotio        | Asco      | 14 | 6  | 10 | 24 | 54 | GCA_010883545.1 |                                                                                                                                                                                                                                                                                                                                                                                                                                                                                                                                                                                                                                                                                                                                                                                                                                                                                                                                                                                                                                                                                                            |
| 1349 | <i>Fibroporia radiculosa</i>          | Agarico        | Basidio   | 18 | 12 | 10 | 14 | 54 | GCA_000313525.1 |                                                                                                                                                                                                                                                                                                                                                                                                                                                                                                                                                                                                                                                                                                                                                                                                                                                                                                                                                                                                                                                                                                            |
| 1350 | <i>Rhizopogon vinicolor</i>           | Agarico        | Basidio   | 16 | 2  | 6  | 30 | 54 | GCA_001658105.1 |                                                                                                                                                                                                                                                                                                                                                                                                                                                                                                                                                                                                                                                                                                                                                                                                                                                                                                                                                                                                                                                                                                            |
| 1351 | <i>Rhizoclostridium globosum</i>      | Chytridio      | Chytridio | 8  | 16 | 0  | 29 | 53 | GCA_002104985.1 |                                                                                                                                                                                                                                                                                                                                                                                                                                                                                                                                                                                                                                                                                                                                                                                                                                                                                                                                                                                                                                                                                                            |
| 1352 | <i>Cladobotryum protrusum</i>         | Sordario       | Asco      | 22 | 2  | 10 | 19 | 53 | GCA_004303015.1 |                                                                                                                                                                                                                                                                                                                                                                                                                                                                                                                                                                                                                                                                                                                                                                                                                                                                                                                                                                                                                                                                                                            |
| 1353 | <i>Cordyceps pruinosa</i>             | Sordario       | Asco      | 16 | 11 | 6  | 20 | 53 | GCA_003025255.1 |                                                                                                                                                                                                                                                                                                                                                                                                                                                                                                                                                                                                                                                                                                                                                                                                                                                                                                                                                                                                                                                                                                            |
| 1354 | <i>Umbelopsis isabellina</i>          | Umbelopsido    | Mucoro    | 10 | 22 | 6  | 15 | 53 | GCA_000697415.1 |                                                                                                                                                                                                                                                                                                                                                                                                                                                                                                                                                                                                                                                                                                                                                                                                                                                                                                                                                                                                                                                                                                            |
| 1355 | <i>Hirsutella rhossiliensis</i>       | Sordario       | Asco      | 16 | 5  | 6  | 26 | 53 | GCA_004142005.1 |                                                                                                                                                                                                                                                                                                                                                                                                                                                                                                                                                                                                                                                                                                                                                                                                                                                                                                                                                                                                                                                                                                            |
| 1356 | <i>Gyalolechia flavorubescens</i>     | Lecanoro       | Asco      | 16 | 6  | 7  | 24 | 53 | GCA_000442125.1 |                                                                                                                                                                                                                                                                                                                                                                                                                                                                                                                                                                                                                                                                                                                                                                                                                                                                                                                                                                                                                                                                                                            |
| 1357 | <i>Takashimella koratensis</i>        | Tremello       | Basidio   | 12 | 17 | 12 | 12 | 53 | GCA_003116875.1 |                                                                                                                                                                                                                                                                                                                                                                                                                                                                                                                                                                                                                                                                                                                                                                                                                                                                                                                                                                                                                                                                                                            |
| 1358 | <i>Gonapodya prolifera</i>            | Monoblepharido | Chytridio | 9  | 26 | 0  | 18 | 53 | GCA_001574975.1 |                                                                                                                                                                                                                                                                                                                                                                                                                                                                                                                                                                                                                                                                                                                                                                                                                                                                                                                                                                                                                                                                                                            |
| 1359 | <i>Boletus sp. MG95</i>               | Agarico        | Basidio   | 12 | 4  | 5  | 32 | 53 | GCA_003313155.1 |                                                                                                                                                                                                                                                                                                                                                                                                                                                                                                                                                                                                                                                                                                                                                                                                                                                                                                                                                                                                                                                                                                            |
| 1360 | <i>Neoboletus brunneissimus</i>       | Agarico        | Basidio   | 14 | 2  | 5  | 32 | 53 | GCA_003316195.1 |                                                                                                                                                                                                                                                                                                                                                                                                                                                                                                                                                                                                                                                                                                                                                                                                                                                                                                                                                                                                                                                                                                            |
| 1361 | <i>Cordyceps cicadae</i>              | Sordario       | Asco      | 15 | 8  | 6  | 23 | 52 | GCA_010211705.1 |                                                                                                                                                                                                                                                                                                                                                                                                                                                                                                                                                                                                                                                                                                                                                                                                                                                                                                                                                                                                                                                                                                            |
| 1362 | <i>Exophiala phaeomuriformis</i>      | Eurotio        | Asco      | 14 | 6  | 8  | 24 | 52 | GCA_010883475.1 |                                                                                                                                                                                                                                                                                                                                                                                                                                                                                                                                                                                                                                                                                                                                                                                                                                                                                                                                                                                                                                                                                                            |
| 1363 | <i>Moesziomyces sp. F5C1</i>          | Ustilagino     | Basidio   | 12 | 12 | 10 | 18 | 52 | GCA_003004715.1 |                                                                                                                                                                                                                                                                                                                                                                                                                                                                                                                                                                                                                                                                                                                                                                                                                                                                                                                                                                                                                                                                                                            |
| 1364 | <i>Pseudevernia furfuracea</i>        | Lecanoro       | Asco      | 18 | 2  | 2  | 30 | 52 | GCA_003184345.1 |                                                                                                                                                                                                                                                                                                                                                                                                                                                                                                                                                                                                                                                                                                                                                                                                                                                                                                                                                                                                                                                                                                            |
| 1365 | <i>Cladonia rangiferina</i>           | Lecanoro       | Asco      | 14 | 4  | 2  | 32 | 52 | GCA_006146055.1 |                                                                                                                                                                                                                                                                                                                                                                                                                                                                                                                                                                                                                                                                                                                                                                                                                                                                                                                                                                                                                                                                                                            |
| 1366 | <i>Cutaneotrichosporon daszewskae</i> | Tremello       | Basidio   | 12 | 14 | 10 | 16 | 52 | GCA_002335585.1 |                                                                                                                                                                                                                                                                                                                                                                                                                                                                                                                                                                                                                                                                                                                                                                                                                                                                                                                                                                                                                                                                                                            |

|      |                                    |             |         |    |    |    |    |    |                 |                                                                                        |
|------|------------------------------------|-------------|---------|----|----|----|----|----|-----------------|----------------------------------------------------------------------------------------|
| 1367 | <i>Endoconidiophora laricicola</i> | Sordario    | Asco    | 18 | 15 | 4  | 15 | 52 | GCA_001640655.1 | Forestry and Agricultural<br>Biotechnology Institute                                   |
| 1368 | <i>Huntiaella savannae</i>         | Sordario    | Asco    | 16 | 14 | 5  | 17 | 52 | GCA_001483325.1 | Forestry and Agricultural<br>Biotechnology Institute                                   |
| 1369 | <i>Huntiaella decipiens</i>        | Sordario    | Asco    | 16 | 14 | 5  | 17 | 52 | GCA_003032515.1 | Forestry and Agricultural<br>Biotechnology Institute                                   |
| 1370 | <i>Albatrellus sp. MG142</i>       | Agarico     | Basidio | 14 | 2  | 6  | 30 | 52 | GCA_003314695.1 | Kunming University of Science<br>and Technology                                        |
| 1371 | <i>Beauveria sp. IMV 00265</i>     | Sordario    | Asco    | 18 | 9  | 2  | 22 | 51 | GCA_001931865.2 | Jet Propulsion Laboratory,<br>California Institute of<br>Technology                    |
| 1372 | <i>Beauveria rudraprayagi</i>      | Sordario    | Asco    | 16 | 8  | 4  | 23 | 51 | GCA_000733645.1 | CSIR- Institute of Microbial<br>technology (IMTECH)                                    |
| 1373 | <i>Paecilomyces penicillatus</i>   | Sordario    | Asco    | 22 | 10 | 5  | 14 | 51 | GCA_005765155.1 | Biotechnology and Nuclear<br>Technology Research Institute                             |
| 1374 | <i>Cordyceps sp. RAO-2017</i>      | Sordario    | Asco    | 16 | 5  | 4  | 26 | 51 | GCA_002591385.1 | Utrecht University                                                                     |
| 1375 | <i>Moesziomyces aphidis</i>        | Ustilagino  | Basidio | 12 | 12 | 10 | 17 | 51 | GCA_000517465.1 | Fraunhofer IGB                                                                         |
| 1376 | <i>Symbiotaphrina buchneri</i>     | Xylono      | Asco    | 10 | 14 | 8  | 19 | 51 | GCA_001599915.1 | RIKEN Center for Life Science<br>Technologies, Division of<br>Genomic Technologies     |
| 1377 | <i>Sparassis latifolia</i>         | Agarico     | Basidio | 18 | 4  | 9  | 20 | 51 | GCA_009812315.1 | Chosun University                                                                      |
| 1378 | <i>Gigaspora margarita</i>         | Glomero     | Mucoro  | 12 | 3  | 0  | 36 | 51 | GCA_009809945.1 | CNR                                                                                    |
| 1379 | <i>Paxillus involutus</i>          | Agarico     | Basidio | 12 | 4  | 5  | 30 | 51 | GCA_000827475.1 | JGI                                                                                    |
| 1380 | <i>Endoconidiophora polonica</i>   | Sordario    | Asco    | 17 | 15 | 4  | 15 | 51 | GCA_001856765.1 | Forestry and Agricultural<br>Biotechnology Institute                                   |
| 1381 | <i>Huntiaella bhutanensis</i>      | Sordario    | Asco    | 16 | 13 | 5  | 17 | 51 | GCA_002018275.1 | Forestry and Agricultural<br>Biotechnology Institute                                   |
| 1382 | <i>Huntiaella omanensis</i>        | Sordario    | Asco    | 16 | 13 | 5  | 17 | 51 | GCA_000833645.1 | FABI                                                                                   |
| 1383 | <i>Chroogomphus rutilus</i>        | Agarico     | Basidio | 12 | 0  | 2  | 37 | 51 | GCA_003314275.1 | Kunming University of Science<br>and Technology                                        |
| 1384 | <i>Cordyceps fumosorosea</i>       | Sordario    | Asco    | 16 | 8  | 4  | 22 | 50 | GCA_001636725.1 | Shanghai Institutes for<br>Biological Sciences, CAS                                    |
| 1385 | <i>Ceratocystiopsis minuta</i>     | Sordario    | Asco    | 14 | 16 | 4  | 16 | 50 | GCA_001676865.1 | University of Pretoria                                                                 |
| 1386 | <i>Claviceps fusiformis</i>        | Sordario    | Asco    | 14 | 12 | 10 | 14 | 50 | GCA_000223055.1 | University of Kentucky, Dept of<br>Plant Pathology                                     |
| 1387 | <i>Ceratocystis manginecans</i>    | Sordario    | Asco    | 15 | 15 | 6  | 14 | 50 | GCA_006408425.1 | University of Pretoria                                                                 |
| 1388 | <i>Leucosporidium scottii</i>      | Microbotryo | Basidio | 11 | 12 | 6  | 21 | 50 | GCA_003054985.1 | UCIBIO-REQUIMTE, Faculdade<br>de Ciencias e Tecnologia,<br>Universidade Nova da Lisboa |
| 1389 | <i>Ceratocystis eucalypticola</i>  | Sordario    | Asco    | 15 | 15 | 6  | 14 | 50 | GCA_001513815.1 | University of pretoria                                                                 |
| 1390 | <i>Ceratocystis cacaofunesta</i>   | Sordario    | Asco    | 15 | 15 | 6  | 14 | 50 | GCA_002776505.1 | University of Campinas                                                                 |
| 1391 | <i>Ceratocystis fimbriata</i>      | Sordario    | Asco    | 15 | 15 | 6  | 14 | 50 | GCA_009914735.1 | Universidade Federal de Vicosa                                                         |
| 1392 | <i>Eurotiomycetes sp. MA 6038</i>  | Eurotio     | Asco    | 15 | 12 | 6  | 17 | 50 | GCA_003004525.2 | University of Natural Resources<br>and Life Sciences, Vienna                           |



|      |                                       |            |         |    |    |    |    |    |                 |                                                                                                                                                                                                                                                                                                                                                                                                                                                                                                                                                                                                                                                                                                                                                                                                                                                                                                                                                                                                                                                                                                                                              |
|------|---------------------------------------|------------|---------|----|----|----|----|----|-----------------|----------------------------------------------------------------------------------------------------------------------------------------------------------------------------------------------------------------------------------------------------------------------------------------------------------------------------------------------------------------------------------------------------------------------------------------------------------------------------------------------------------------------------------------------------------------------------------------------------------------------------------------------------------------------------------------------------------------------------------------------------------------------------------------------------------------------------------------------------------------------------------------------------------------------------------------------------------------------------------------------------------------------------------------------------------------------------------------------------------------------------------------------|
| 1393 | <i>Ceratocystis platani</i>           | Sordario   | Asco    | 15 | 15 | 6  | 14 | 50 | GCA_000978885.1 | University of Neuchatel<br>Research Institute of Tropical<br>Forestry, Chinese Academy of<br>Forestry<br>Forestry and Agricultural<br>Biotechnology Institute<br>University of Florida<br>University of Pretoria<br>Metarhizium genome<br>sequencing Consortium<br>Shanghai Institutes for<br>Biological Sciences, CAS<br>University of California,<br>Riverside<br>RIKEN Center for Life Science<br>Technologies, Division of<br>Genomic Technologies<br>Tsukuba Biotechnology<br>Research Center, Astellas<br>Pharma Inc.,<br>Technische Universitat<br>Munchen - WZW<br>Department of Pediatric<br>Cardiology, Tokyo Women's<br>Medical University<br>University of Manitoba<br>University of Natural Resources<br>and Life Sciences, Vienna<br>Forestry and Agricultural<br>Biotechnology Institute<br>RIKEN Center for Life Science<br>Technologies, Division of<br>Genomic Technologies<br>Oregon State University<br>IGS<br>Biotechnology Institute-<br>National University of<br>Colombia- Bogota<br>DOE Joint Genome Institute<br>UNIVERSITY OF MALAYA<br>RWTH Aachen University<br>Kunming University of Science<br>and Technology |
| 1394 | <i>Russula griseocarnosa</i>          | Agarico    | Basidio | 10 | 0  | 2  | 38 | 50 | GCA_004801975.1 |                                                                                                                                                                                                                                                                                                                                                                                                                                                                                                                                                                                                                                                                                                                                                                                                                                                                                                                                                                                                                                                                                                                                              |
| 1395 | <i>Ceratocystis harringtonii</i>      | Sordario   | Asco    | 15 | 15 | 6  | 14 | 50 | GCA_002018265.1 |                                                                                                                                                                                                                                                                                                                                                                                                                                                                                                                                                                                                                                                                                                                                                                                                                                                                                                                                                                                                                                                                                                                                              |
| 1396 | <i>Rhizopogon vesiculosus</i>         | Agarico    | Basidio | 13 | 2  | 7  | 28 | 50 | GCA_001882365.1 |                                                                                                                                                                                                                                                                                                                                                                                                                                                                                                                                                                                                                                                                                                                                                                                                                                                                                                                                                                                                                                                                                                                                              |
| 1397 | <i>Ceratocystis albifundus</i>        | Sordario   | Asco    | 15 | 15 | 6  | 14 | 50 | GCA_002742255.2 |                                                                                                                                                                                                                                                                                                                                                                                                                                                                                                                                                                                                                                                                                                                                                                                                                                                                                                                                                                                                                                                                                                                                              |
| 1398 | <i>Metarhizium acridum</i>            | Sordario   | Asco    | 16 | 6  | 3  | 24 | 49 | GCA_000187405.1 |                                                                                                                                                                                                                                                                                                                                                                                                                                                                                                                                                                                                                                                                                                                                                                                                                                                                                                                                                                                                                                                                                                                                              |
| 1399 | <i>Beauveria brongniartii</i>         | Sordario   | Asco    | 16 | 9  | 2  | 22 | 49 | GCA_001636735.1 |                                                                                                                                                                                                                                                                                                                                                                                                                                                                                                                                                                                                                                                                                                                                                                                                                                                                                                                                                                                                                                                                                                                                              |
| 1400 | <i>Bifiguratus adelaidae</i>          | Endogono   | Mucoro  | 16 | 12 | 5  | 16 | 49 | GCA_002261195.1 |                                                                                                                                                                                                                                                                                                                                                                                                                                                                                                                                                                                                                                                                                                                                                                                                                                                                                                                                                                                                                                                                                                                                              |
| 1401 | <i>Albophoma yamanashiensis</i>       | Sordario   | Asco    | 15 | 8  | 5  | 21 | 49 | GCA_001600555.1 |                                                                                                                                                                                                                                                                                                                                                                                                                                                                                                                                                                                                                                                                                                                                                                                                                                                                                                                                                                                                                                                                                                                                              |
| 1402 | <i>fungal sp. No.11243</i>            | 0          | 0       | 14 | 12 | 5  | 18 | 49 | GCA_000836255.1 |                                                                                                                                                                                                                                                                                                                                                                                                                                                                                                                                                                                                                                                                                                                                                                                                                                                                                                                                                                                                                                                                                                                                              |
| 1403 | <i>Moesziomyces antarcticus</i>       | Ustilagino | Basidio | 12 | 11 | 10 | 16 | 49 | GCA_900322835.1 |                                                                                                                                                                                                                                                                                                                                                                                                                                                                                                                                                                                                                                                                                                                                                                                                                                                                                                                                                                                                                                                                                                                                              |
| 1404 | <i>Sparassis crispa</i>               | Agarico    | Basidio | 18 | 6  | 9  | 16 | 49 | GCA_003851025.1 |                                                                                                                                                                                                                                                                                                                                                                                                                                                                                                                                                                                                                                                                                                                                                                                                                                                                                                                                                                                                                                                                                                                                              |
| 1405 | <i>Cladonia uncialis</i>              | Lecanoro   | Asco    | 14 | 4  | 3  | 28 | 49 | GCA_002927785.1 |                                                                                                                                                                                                                                                                                                                                                                                                                                                                                                                                                                                                                                                                                                                                                                                                                                                                                                                                                                                                                                                                                                                                              |
| 1406 | <i>Eurotiomycetes sp. MA 6039</i>     | Eurotio    | Asco    | 16 | 13 | 4  | 16 | 49 | GCA_003004485.1 |                                                                                                                                                                                                                                                                                                                                                                                                                                                                                                                                                                                                                                                                                                                                                                                                                                                                                                                                                                                                                                                                                                                                              |
| 1407 | <i>Ceratocystis adiposa</i>           | Sordario   | Asco    | 14 | 13 | 7  | 15 | 49 | GCA_001640685.1 |                                                                                                                                                                                                                                                                                                                                                                                                                                                                                                                                                                                                                                                                                                                                                                                                                                                                                                                                                                                                                                                                                                                                              |
| 1408 | <i>Chalaropsis thielavioides</i>      | Sordario   | Asco    | 15 | 14 | 5  | 15 | 49 | GCA_001599435.1 |                                                                                                                                                                                                                                                                                                                                                                                                                                                                                                                                                                                                                                                                                                                                                                                                                                                                                                                                                                                                                                                                                                                                              |
| 1409 | <i>Rhizopogon sp. AM-2018a</i>        | Agarico    | Basidio | 12 | 3  | 6  | 28 | 49 | GCA_002995095.1 |                                                                                                                                                                                                                                                                                                                                                                                                                                                                                                                                                                                                                                                                                                                                                                                                                                                                                                                                                                                                                                                                                                                                              |
| 1410 | <i>Mucor racemosus</i>                | Mucoro     | Mucoro  | 16 | 7  | 1  | 24 | 48 | GCA_000697255.1 |                                                                                                                                                                                                                                                                                                                                                                                                                                                                                                                                                                                                                                                                                                                                                                                                                                                                                                                                                                                                                                                                                                                                              |
| 1411 | <i>Beauveria bassiana</i>             | Sordario   | Asco    | 16 | 8  | 2  | 22 | 48 | GCA_003337105.1 |                                                                                                                                                                                                                                                                                                                                                                                                                                                                                                                                                                                                                                                                                                                                                                                                                                                                                                                                                                                                                                                                                                                                              |
| 1412 | <i>Polychaeton citri</i>              | Dothideo   | Asco    | 12 | 8  | 5  | 23 | 48 | GCA_010093785.1 |                                                                                                                                                                                                                                                                                                                                                                                                                                                                                                                                                                                                                                                                                                                                                                                                                                                                                                                                                                                                                                                                                                                                              |
| 1413 | <i>Herpotrichiellaceae sp. UM238</i>  | Eurotio    | Asco    | 18 | 8  | 0  | 22 | 48 | GCA_000315175.1 |                                                                                                                                                                                                                                                                                                                                                                                                                                                                                                                                                                                                                                                                                                                                                                                                                                                                                                                                                                                                                                                                                                                                              |
| 1414 | <i>Pseudozyma tsukubaensis</i>        | Ustilagino | Basidio | 12 | 14 | 6  | 16 | 48 | GCA_001736125.1 |                                                                                                                                                                                                                                                                                                                                                                                                                                                                                                                                                                                                                                                                                                                                                                                                                                                                                                                                                                                                                                                                                                                                              |
| 1415 | <i>Tylophilus plumbeoviolaceoides</i> | Agarico    | Basidio | 10 | 2  | 5  | 31 | 48 | GCA_003316375.1 |                                                                                                                                                                                                                                                                                                                                                                                                                                                                                                                                                                                                                                                                                                                                                                                                                                                                                                                                                                                                                                                                                                                                              |

|      |                                   |             |         |    |    |    |    |    |                 |                                                                                                      |
|------|-----------------------------------|-------------|---------|----|----|----|----|----|-----------------|------------------------------------------------------------------------------------------------------|
| 1416 | <i>Ceratocystis smalleyi</i>      | Sordario    | Asco    | 15 | 14 | 6  | 13 | 48 | GCA_003449175.1 | Forestry and Agricultural<br>Biotechnology Institute                                                 |
| 1417 | <i>Verruconis sp.</i>             | Dothideo    | Asco    | 13 | 12 | 5  | 18 | 48 | GCA_004026245.1 | Jill Banfield's Lab at Berkeley                                                                      |
| 1418 | <i>Floccularia luteovirens</i>    | Agarico     | Basidio | 12 | 2  | 8  | 26 | 48 | GCA_009739215.1 | Zhejiang University                                                                                  |
| 1419 | <i>Basidiobolus meristosporus</i> | Basidiobolo | Zoopago | 10 | 3  | 0  | 34 | 47 | GCA_002104905.1 | DOE Joint Genome Institute                                                                           |
| 1420 | <i>Linderina pennispora</i>       | Kickxello   | Zoopago | 3  | 4  | 1  | 39 | 47 | GCA_002104995.1 | DOE Joint Genome Institute                                                                           |
| 1421 | <i>Tolypocladium paradoxum</i>    | Sordario    | Asco    | 17 | 6  | 7  | 17 | 47 | GCA_002916505.1 | Oregon State University                                                                              |
| 1422 | <i>Tuber microsphaerosporum</i>   | Pezizo      | Asco    | 15 | 12 | 2  | 18 | 47 | GCA_003521225.1 | Kunming University of Science<br>and Technology                                                      |
| 1423 | <i>Cryomyces antarcticus</i>      | Dothideo    | Asco    | 10 | 7  | 4  | 26 | 47 | GCA_000504465.1 | VIBT Extremophile Center,<br>University of Natural Resources<br>and Life Sciences Vienna,<br>Austria |
| 1424 | <i>Claviceps paspali</i>          | Sordario    | Asco    | 11 | 12 | 10 | 14 | 47 | GCA_013435705.1 | INIA                                                                                                 |
| 1425 | <i>Atkinsonella hypoxylon</i>     | Sordario    | Asco    | 11 | 14 | 9  | 13 | 47 | GCA_000729835.1 | University of Kentucky                                                                               |
| 1426 | <i>Arthrocladium fulminans</i>    | Eurotio     | Asco    | 20 | 10 | 4  | 13 | 47 | GCA_003614865.1 | Westerdijk Fungal Biodiversity<br>Institute                                                          |
| 1427 | <i>Peltaster fructicola</i>       | Dothideo    | Asco    | 10 | 9  | 8  | 20 | 47 | GCA_001592805.2 | Northwest A&F University                                                                             |
| 1428 | <i>Capronia coronata</i>          | Eurotio     | Asco    | 15 | 6  | 6  | 20 | 47 | GCA_000585585.1 | Broad Institute                                                                                      |
| 1429 | <i>Suillus sp. MG131</i>          | Agarico     | Basidio | 14 | 5  | 4  | 24 | 47 | GCA_003313855.1 | Kunming University of Science<br>and Technology                                                      |
| 1430 | <i>Cordyceps tenuipes</i>         | Sordario    | Asco    | 14 | 8  | 4  | 20 | 46 | GCA_003025305.1 | National Institute of<br>Horticultural and Herbal<br>Science, Rural Development<br>Administration    |
| 1431 | <i>Rhizopus azygosporus</i>       | Mucoro      | Mucoro  | 18 | 10 | 0  | 18 | 46 | GCA_003325435.1 | University of California,<br>Riverside                                                               |
| 1432 | <i>Moelleriella libera</i>        | Sordario    | Asco    | 14 | 4  | 6  | 22 | 46 | GCA_001636675.1 | Shanghai Institutes for<br>Biological Sciences, CAS                                                  |
| 1433 | <i>Epichloe brachyelytri</i>      | Sordario    | Asco    | 14 | 8  | 8  | 16 | 46 | GCA_000222915.1 | University of Kentucky, Dept of<br>Plant Pathology                                                   |
| 1434 | <i>Pseudozyma hubeiensis</i>      | Ustilagino  | Basidio | 12 | 10 | 8  | 16 | 46 | GCA_000403515.1 | Kitami Institute of Technology                                                                       |
| 1435 | <i>Bullera alba</i>               | Tremello    | Basidio | 10 | 12 | 14 | 10 | 46 | GCA_001600095.1 | RIKEN Center for Life Science<br>Technologies, Division of<br>Genomic Technologies                   |
| 1436 | <i>Rusavskia elegans</i>          | Lecanoro    | Asco    | 16 | 4  | 6  | 20 | 46 | GCA_011316305.1 | Yunnan Academy of Forestry                                                                           |
| 1437 | <i>Apiotrichum gracile</i>        | Tremello    | Basidio | 14 | 4  | 9  | 19 | 46 | GCA_001600335.1 | RIKEN Center for Life Science<br>Technologies, Division of<br>Genomic Technologies                   |
| 1438 | <i>Cladonia metacorallifera</i>   | Lecanoro    | Asco    | 13 | 4  | 3  | 26 | 46 | GCA_000482085.2 | Seoul National University                                                                            |
| 1439 | <i>Drechlerella stenobrocha</i>   | Orbilio     | Asco    | 17 | 8  | 8  | 13 | 46 | GCA_000525045.1 | Institute of Microbiology,<br>Chinese Academy of Sciences                                            |
| 1440 | <i>Boletus speciosus</i>          | Agarico     | Basidio | 11 | 4  | 5  | 26 | 46 | GCA_003316055.1 | Kunming University of Science<br>and Technology                                                      |

|      |                                        |            |           |    |    |    |    |    |                 |                                                                              |
|------|----------------------------------------|------------|-----------|----|----|----|----|----|-----------------|------------------------------------------------------------------------------|
| 1441 | <i>Ramaria sp. MG151</i>               | Agarico    | Basidio   | 14 | 2  | 2  | 28 | 46 | GCA_003314545.1 | Kunming University of Science and Technology                                 |
| 1442 | <i>Epichloe gansuensis</i>             | Sordario   | Asco      | 13 | 8  | 9  | 15 | 45 | GCA_000222895.2 | University of Kentucky, Dept of Plant Pathology                              |
| 1443 | <i>Epichloe inebrians</i>              | Sordario   | Asco      | 13 | 7  | 9  | 16 | 45 | GCA_000309355.1 | University of Kentucky                                                       |
| 1444 | <i>Atkinsonella texensis</i>           | Sordario   | Asco      | 10 | 14 | 7  | 14 | 45 | GCA_001008035.1 | University of Kentucky                                                       |
| 1445 | <i>Epichloe bromicola</i>              | Sordario   | Asco      | 12 | 10 | 8  | 15 | 45 | GCA_002319005.1 | University of Kentucky                                                       |
| 1446 | <i>Balansia obtecta</i>                | Sordario   | Asco      | 12 | 12 | 7  | 14 | 45 | GCA_000709145.1 | University of Kentucky                                                       |
| 1447 | <i>Sporisorium reilianum</i>           | Ustilagino | Basidio   | 12 | 9  | 8  | 16 | 45 | GCA_900162835.1 | Technische Universitat Munchen - WZW                                         |
| 1448 | <i>Pseudozyma sp. F8B2</i>             | Ustilagino | Basidio   | 11 | 10 | 8  | 16 | 45 | GCA_003004685.1 | Universidade de Sao Paulo                                                    |
| 1449 | <i>Sporisorium iseilematis-ciliati</i> | Ustilagino | Basidio   | 11 | 10 | 8  | 16 | 45 | GCA_001748505.1 | RWTH Aachen University                                                       |
| 1450 | <i>Capronia epimyces</i>               | Eurotio    | Asco      | 12 | 4  | 4  | 25 | 45 | GCA_000585565.1 | Broad Institute                                                              |
| 1451 | <i>Gigaspora rosea</i>                 | Glomero    | Mucoro    | 10 | 3  | 0  | 32 | 45 | GCA_003550325.1 | INRA                                                                         |
| 1452 | <i>Solicoccozyma phenolica</i>         | Tremello   | Basidio   | 10 | 16 | 5  | 14 | 45 | GCA_001600015.1 | RIKEN Center for Life Science Technologies, Division of Genomic Technologies |
| 1453 | <i>Paxillus rubicundulus</i>           | Agarico    | Basidio   | 10 | 2  | 5  | 28 | 45 | GCA_000827395.1 | DOE Joint Genome Institute                                                   |
| 1454 | <i>Rhizopogon rudus</i>                | Agarico    | Basidio   | 12 | 3  | 2  | 28 | 45 | GCA_002995055.1 | Oregon State University                                                      |
| 1455 | <i>Retiboletus ornatipes</i>           | Agarico    | Basidio   | 12 | 3  | 6  | 24 | 45 | GCA_003316065.1 | Kunming University of Science and Technology                                 |
| 1456 | <i>Boletus bicolor</i>                 | Agarico    | Basidio   | 13 | 2  | 6  | 24 | 45 | GCA_003316205.1 | Kunming University of Science and Technology                                 |
| 1457 | <i>Hypomyces perniciosus</i>           | Sordario   | Asco      | 18 | 6  | 6  | 14 | 44 | GCA_008477525.1 | Jilin Agricultural University                                                |
| 1458 | <i>Cordyceps militaris</i>             | Sordario   | Asco      | 16 | 6  | 2  | 20 | 44 | GCA_003332165.1 | pangugene                                                                    |
| 1459 | <i>Epichloe sylvatica</i>              | Sordario   | Asco      | 12 | 8  | 8  | 16 | 44 | GCA_001008265.1 | University of Kentucky                                                       |
| 1460 | <i>Epichloe baconii</i>                | Sordario   | Asco      | 14 | 8  | 8  | 14 | 44 | GCA_000729845.1 | University of Kentucky                                                       |
| 1461 | <i>Sporisorium graminicola</i>         | Ustilagino | Basidio   | 11 | 11 | 6  | 16 | 44 | GCA_005498985.1 | University of Liverpool, Institute of Integrative Biology                    |
| 1462 | <i>Epichloe aotearoae</i>              | Sordario   | Asco      | 12 | 8  | 10 | 14 | 44 | GCA_000729855.1 | University of Kentucky                                                       |
| 1463 | <i>Aciculosporium take</i>             | Sordario   | Asco      | 12 | 10 | 6  | 16 | 44 | GCA_000222935.2 | University of Kentucky, Dept of Plant Pathology                              |
| 1464 | <i>Tuber borchii</i>                   | Pezizo     | Asco      | 16 | 12 | 2  | 14 | 44 | GCA_003070745.1 | DOE Joint Genome Institute                                                   |
| 1465 | <i>Tuber brumale</i>                   | Pezizo     | Asco      | 14 | 12 | 3  | 15 | 44 | GCA_014065205.1 | INRAE                                                                        |
| 1466 | <i>Synchytrium microbalum</i>          | Chytridio  | Chytridio | 14 | 6  | 0  | 24 | 44 | GCA_006535985.1 | Agriculture and Agri-Food Canada                                             |
| 1467 | <i>Lactarius sp. MG121</i>             | Agarico    | Basidio   | 12 | 1  | 1  | 30 | 44 | GCA_003315925.1 | Kunming University of Science and Technology                                 |
| 1468 | <i>Cutaneotrichosporon cutaneum</i>    | Tremello   | Basidio   | 10 | 6  | 10 | 18 | 44 | GCA_001600715.1 | RIKEN Center for Life Science Technologies, Division of Genomic Technologies |
| 1469 | <i>Russula foetens</i>                 | Agarico    | Basidio   | 12 | 0  | 4  | 28 | 44 | GCA_003316565.1 | Kunming University of Science and Technology                                 |
| 1470 | <i>Lactarius deliciosus</i>            | Agarico    | Basidio   | 12 | 0  | 0  | 32 | 44 | GCA_006680135.1 | UCSI University                                                              |

|      |                                                        |            |         |    |    |    |    |    |                 |                                                                              |
|------|--------------------------------------------------------|------------|---------|----|----|----|----|----|-----------------|------------------------------------------------------------------------------|
| 1471 | <i>Serpula lacrymans</i>                               | Agarico    | Basidio | 17 | 6  | 7  | 14 | 44 | GCA_002891385.1 | University of Oslo                                                           |
| 1472 | <i>Xerocomus impolitus</i>                             | Agarico    | Basidio | 10 | 6  | 6  | 22 | 44 | GCA_003316335.1 | Kunming University of Science and Technology                                 |
| 1473 | <i>Suillellus subvelutipes</i>                         | Agarico    | Basidio | 11 | 2  | 4  | 27 | 44 | GCA_003316035.1 | Kunming University of Science and Technology                                 |
| 1474 | <i>Solicoccozyma terricola</i>                         | Tremello   | Basidio | 16 | 16 | 2  | 10 | 44 | GCA_001600875.1 | RIKEN Center for Life Science Technologies, Division of Genomic Technologies |
| 1475 | <i>Butyriboletus roseoflavus</i>                       | Agarico    | Basidio | 12 | 4  | 4  | 24 | 44 | GCA_003315995.1 | Kunming University of Science and Technology                                 |
| 1476 | <i>Mucor indicus</i>                                   | Mucoro     | Mucoro  | 12 | 3  | 0  | 28 | 43 | GCA_000697295.1 | IGS                                                                          |
| 1477 | <i>Microcycluspora pomicola</i>                        | Dothideo   | Asco    | 10 | 6  | 12 | 15 | 43 | GCA_002786065.1 | Northwest A&F University                                                     |
| 1478 | <i>Syncephalastrum monosporum</i>                      | Mucoro     | Mucoro  | 9  | 16 | 2  | 16 | 43 | GCA_000697355.1 | IGS                                                                          |
| 1479 | <i>Ophiocordyceps camponoti-leonardi (nom. inval.)</i> | Sordario   | Asco    | 12 | 7  | 3  | 21 | 43 | GCA_003339455.1 | National Center for Genetic Engineering and Biotechnology                    |
| 1480 | <i>Ophiocordyceps polyrhachis-furcata</i>              | Sordario   | Asco    | 12 | 6  | 5  | 20 | 43 | GCA_001633055.2 | National Center for Genetic Engineering and Biotechnology (BIOTEC)           |
| 1481 | <i>Claviceps cf. purpurea</i>                          | Sordario   | Asco    | 12 | 12 | 7  | 12 | 43 | GCA_004016475.1 | Agriculture and Agri-Food Canada                                             |
| 1482 | <i>Ophiocordyceps sinensis</i>                         | Sordario   | Asco    | 14 | 2  | 3  | 24 | 43 | GCA_002077885.1 | Institute of Microbiology, Chinese Academy of Sciences                       |
| 1483 | <i>Papiliotrema flavescens</i>                         | Tremello   | Basidio | 8  | 12 | 11 | 12 | 43 | GCA_000442785.1 | OSU/OARDC                                                                    |
| 1484 | <i>Letharia lupina</i>                                 | Lecanoro   | Asco    | 16 | 2  | 2  | 23 | 43 | GCA_014066315.1 | Eastern Washington University                                                |
| 1485 | <i>Vanrija humicola</i>                                | Tremello   | Basidio | 16 | 6  | 5  | 16 | 43 | GCA_008065275.1 | Ruhr-University Bochum                                                       |
| 1486 | <i>Ustilago tritici</i>                                | Ustilagino | Basidio | 12 | 8  | 7  | 16 | 43 | GCA_002993085.1 | University of Sao Paulo                                                      |
| 1487 | <i>Violaceomyces palustris</i>                         | Ustilagino | Basidio | 10 | 10 | 4  | 19 | 43 | GCA_003144235.1 | DOE Joint Genome Institute                                                   |
| 1488 | <i>Ambrosiella xylebori</i>                            | Sordario   | Asco    | 12 | 11 | 6  | 14 | 43 | GCA_002778035.1 | University of Montana                                                        |
| 1489 | <i>Gomphus bonarii</i>                                 | Agarico    | Basidio | 10 | 0  | 1  | 32 | 43 | GCA_003316585.1 | Kunming University of Science and Technology                                 |
| 1490 | <i>Ophio. camponoti-saundersi (nom. inval.)</i>        | Sordario   | Asco    | 12 | 5  | 3  | 22 | 42 | GCA_003339415.1 | National Center for Genetic Engineering and Biotechnology                    |
| 1491 | <i>Epichloe festucae</i>                               | Sordario   | Asco    | 12 | 8  | 8  | 14 | 42 | GCA_002318955.1 | University of Kentucky                                                       |
| 1492 | <i>Claviceps purpurea</i>                              | Sordario   | Asco    | 12 | 12 | 6  | 12 | 42 | GCA_004016095.1 | Agriculture and Agri-Food Canada                                             |
| 1493 | <i>Claviceps spartinae</i>                             | Sordario   | Asco    | 12 | 11 | 7  | 12 | 42 | GCA_004016175.1 | Agriculture and Agri-Food Canada                                             |
| 1494 | <i>Claviceps humidiphila</i>                           | Sordario   | Asco    | 12 | 11 | 7  | 12 | 42 | GCA_004016155.1 | Agriculture and Agri-Food Canada                                             |
| 1495 | <i>Epichloe typhina</i>                                | Sordario   | Asco    | 12 | 8  | 8  | 14 | 42 | GCA_000308955.1 | University of Kentucky                                                       |
| 1496 | <i>Epichloe elymi</i>                                  | Sordario   | Asco    | 12 | 8  | 8  | 14 | 42 | GCA_002591845.1 | Massey University                                                            |
| 1497 | <i>Epichloe amarillans</i>                             | Sordario   | Asco    | 12 | 8  | 8  | 14 | 42 | GCA_000223075.2 | University of Kentucky, Dept of Plant Pathology                              |
| 1498 | <i>Letharia columbiana</i>                             | Lecanoro   | Asco    | 15 | 3  | 2  | 22 | 42 | GCA_014066305.1 | Eastern Washington University                                                |

|      |                                      |            |         |    |    |    |    |    |                 |                                                                              |
|------|--------------------------------------|------------|---------|----|----|----|----|----|-----------------|------------------------------------------------------------------------------|
| 1499 | <i>Ustilago cynodontis</i>           | Ustilagino | Basidio | 12 | 8  | 6  | 16 | 42 | GCA_001736195.1 | RWTH Aachen University                                                       |
| 1500 | <i>Tuber umbilicatum</i>             | Pezizo     | Asco    | 12 | 14 | 2  | 14 | 42 | GCA_003313605.1 | Kunming University of Science and Technology                                 |
| 1501 | <i>Ustilago xerochloae</i>           | Ustilagino | Basidio | 10 | 8  | 8  | 16 | 42 | GCA_001736075.1 | RWTH Aachen University                                                       |
| 1502 | <i>Tuber magnatum</i>                | Pezizo     | Asco    | 14 | 10 | 4  | 14 | 42 | GCA_003182015.1 | INRA                                                                         |
| 1503 | <i>Lactarius trivialis</i>           | Agarico    | Basidio | 11 | 0  | 1  | 30 | 42 | GCA_003315845.1 | Kunming University of Science and Technology                                 |
| 1504 | <i>Papiliotrema laurentii</i>        | Tremello   | Basidio | 8  | 12 | 10 | 12 | 42 | GCA_012922615.1 | Jet Propulsion Laboratory, California Institute of Technology                |
| 1505 | <i>Piloderma croceum</i>             | Agarico    | Basidio | 14 | 2  | 0  | 26 | 42 | GCA_000827315.1 | DOE Joint Genome Institute                                                   |
| 1506 | <i>Lactifluus pinguis</i>            | Agarico    | Basidio | 7  | 0  | 0  | 35 | 42 | GCA_003313945.1 | Kunming University of Science and Technology                                 |
| 1507 | <i>Ramaria cf. rubripermanens</i>    | Agarico    | Basidio | 12 | 0  | 2  | 28 | 42 | GCA_003316465.1 | Kunming University of Science and Technology                                 |
| 1508 | <i>Tolypocladium ophioglossoides</i> | Sordario   | Asco    | 13 | 6  | 7  | 15 | 41 | GCA_001189435.1 | Oregon State University                                                      |
| 1509 | <i>Anthracoystis flocculosa</i>      | Ustilagino | Basidio | 10 | 15 | 4  | 12 | 41 | GCA_900322975.1 | Technische Universitat Munchen - WZW                                         |
| 1510 | <i>Hypocrella siamensis</i>          | Sordario   | Asco    | 12 | 4  | 5  | 20 | 41 | GCA_000731825.1 | CSIR- Institute of Microbial technology (IMTECH)                             |
| 1511 | <i>Syncephalastrum racemosum</i>     | Mucoro     | Mucoro  | 9  | 16 | 2  | 14 | 41 | GCA_002105135.1 | DOE Joint Genome Institute                                                   |
| 1512 | <i>Leptoxyphium fumago</i>           | Dothideo   | Asco    | 9  | 4  | 4  | 24 | 41 | GCA_001660795.1 | International Institute Zittau - TU Dresden                                  |
| 1513 | <i>Claviceps arundinis</i>           | Sordario   | Asco    | 10 | 12 | 7  | 12 | 41 | GCA_004016465.1 | Agriculture and Agri-Food Canada                                             |
| 1514 | <i>Monascus purpureus</i>            | Eurotio    | Asco    | 11 | 10 | 4  | 16 | 41 | GCA_011319195.1 | Beijing Technology and Business University                                   |
| 1515 | <i>Dioszegia crocea</i>              | Tremello   | Basidio | 12 | 12 | 10 | 7  | 41 | GCA_001600615.1 | RIKEN Center for Life Science Technologies, Division of Genomic Technologies |
| 1516 | <i>Kalmanozyma brasiliensis</i>      | Ustilagino | Basidio | 10 | 10 | 6  | 15 | 41 | GCA_000497045.1 | Laboratorio Nacional de Ciencia e Tecnologia do Bioetanol                    |
| 1517 | <i>Tuber indicum</i>                 | Pezizo     | Asco    | 14 | 10 | 3  | 14 | 41 | GCA_006112555.1 | College of Pharmacy and Biological Engineering                               |
| 1518 | <i>Dioszegia aurantiaca</i>          | Tremello   | Basidio | 10 | 14 | 9  | 8  | 41 | GCA_001600655.1 | RIKEN Center for Life Science Technologies, Division of Genomic Technologies |
| 1519 | <i>Cladonia macilenta</i>            | Lecanoro   | Asco    | 10 | 4  | 3  | 24 | 41 | GCA_000444155.1 | Seoul National University                                                    |
| 1520 | <i>Russula aff. compacta</i>         | Agarico    | Basidio | 9  | 0  | 2  | 30 | 41 | GCA_003313875.1 | Kunming University of Science and Technology                                 |
| 1521 | <i>Amanita thiersii</i>              | Agarico    | Basidio | 10 | 4  | 5  | 22 | 41 | GCA_002554575.1 | JGI                                                                          |
| 1522 | <i>Caloboletus calopus</i>           | Agarico    | Basidio | 10 | 2  | 3  | 26 | 41 | GCA_003316085.1 | Kunming University of Science and Technology                                 |
| 1523 | <i>Rhizopogon villosulus</i>         | Agarico    | Basidio | 11 | 2  | 4  | 24 | 41 | GCA_002995315.1 | Oregon State University                                                      |

|      |                                           |             |         |    |    |    |    |    |                 |                                                                                                                                                                                                                                                                                                                                                                                                                                                                                                                                                                                                                                                                                                                                                                                                                                                                                                                                                                                                                                                                                                                                                                               |
|------|-------------------------------------------|-------------|---------|----|----|----|----|----|-----------------|-------------------------------------------------------------------------------------------------------------------------------------------------------------------------------------------------------------------------------------------------------------------------------------------------------------------------------------------------------------------------------------------------------------------------------------------------------------------------------------------------------------------------------------------------------------------------------------------------------------------------------------------------------------------------------------------------------------------------------------------------------------------------------------------------------------------------------------------------------------------------------------------------------------------------------------------------------------------------------------------------------------------------------------------------------------------------------------------------------------------------------------------------------------------------------|
| 1524 | <i>Metarhizium rileyi</i>                 | Sordario    | Asco    | 14 | 6  | 2  | 18 | 40 | GCA_007866325.1 | Embrapa<br>Anhui University<br>Computational Biology<br>Research Center (CBRC),<br>National Institute of Advanced<br>Industrial Science and<br>Technology (AIST)<br>University of Melbourne<br>DOE Joint Genome Institute<br>University of Kentucky<br>RIKEN Center for Life Science<br>Technologies, Division of<br>Genomic Technologies<br>The French-Italian Tuber<br>Genome Consortium<br>RIKEN Center for Life Science<br>Technologies, Division of<br>Genomic Technologies<br>Jawaharlal Nehru Centre for<br>Advanced Scientific Research<br>Kunming University of Science<br>and Technology<br>Oregon State University<br>Oregon State University<br>Kunming University of Science<br>and Technology<br>University of East Anglia<br>Utrecht University<br>Oregon State University<br>RIKEN Center for Life Science<br>Technologies, Division of<br>Genomic Technologies<br>DOE Joint Genome Institute<br>Academia Sinica<br>Oregon State University<br>Kunming University of Science<br>and Technology<br>Kunming University of Science<br>and Technology<br>Utrecht University<br>RIKEN Center for Life Science<br>Technologies, Division of<br>Genomic Technologies |
| 1525 | <i>Gongronella sp. w5</i>                 | Mucoro      | Mucoro  | 8  | 12 | 4  | 16 | 40 | GCA_001650995.1 |                                                                                                                                                                                                                                                                                                                                                                                                                                                                                                                                                                                                                                                                                                                                                                                                                                                                                                                                                                                                                                                                                                                                                                               |
| 1526 | <i>Ustilaginoidea virens</i>              | Sordario    | Asco    | 12 | 10 | 4  | 14 | 40 | GCA_000965225.2 |                                                                                                                                                                                                                                                                                                                                                                                                                                                                                                                                                                                                                                                                                                                                                                                                                                                                                                                                                                                                                                                                                                                                                                               |
| 1527 | <i>Syncephalastrum sp. IA-2019</i>        | Mucoro      | Mucoro  | 7  | 16 | 2  | 15 | 40 | GCA_013461545.1 |                                                                                                                                                                                                                                                                                                                                                                                                                                                                                                                                                                                                                                                                                                                                                                                                                                                                                                                                                                                                                                                                                                                                                                               |
| 1528 | <i>Dissoconium aciculare</i>              | Dothideo    | Asco    | 12 | 2  | 8  | 18 | 40 | GCA_010015565.1 |                                                                                                                                                                                                                                                                                                                                                                                                                                                                                                                                                                                                                                                                                                                                                                                                                                                                                                                                                                                                                                                                                                                                                                               |
| 1529 | <i>Epichloe sp. AL9924</i>                | Sordario    | Asco    | 12 | 8  | 8  | 12 | 40 | GCA_000729825.1 |                                                                                                                                                                                                                                                                                                                                                                                                                                                                                                                                                                                                                                                                                                                                                                                                                                                                                                                                                                                                                                                                                                                                                                               |
| 1530 | <i>Apiotrichum brassicae</i>              | Tremello    | Basidio | 8  | 2  | 14 | 16 | 40 | GCA_001600295.1 |                                                                                                                                                                                                                                                                                                                                                                                                                                                                                                                                                                                                                                                                                                                                                                                                                                                                                                                                                                                                                                                                                                                                                                               |
| 1531 | <i>Tuber melanosporum</i>                 | Pezizo      | Asco    | 13 | 10 | 3  | 14 | 40 | GCA_000151645.1 |                                                                                                                                                                                                                                                                                                                                                                                                                                                                                                                                                                                                                                                                                                                                                                                                                                                                                                                                                                                                                                                                                                                                                                               |
| 1532 | <i>Cutaneotrichosporon arboriformis</i>   | Tremello    | Basidio | 8  | 5  | 9  | 18 | 40 | GCA_002335565.1 |                                                                                                                                                                                                                                                                                                                                                                                                                                                                                                                                                                                                                                                                                                                                                                                                                                                                                                                                                                                                                                                                                                                                                                               |
| 1533 | <i>Ustilago hordei</i>                    | Ustilagino  | Basidio | 11 | 8  | 8  | 13 | 40 | GCA_003012045.1 |                                                                                                                                                                                                                                                                                                                                                                                                                                                                                                                                                                                                                                                                                                                                                                                                                                                                                                                                                                                                                                                                                                                                                                               |
| 1534 | <i>Suillus placidus</i>                   | Agarico     | Basidio | 12 | 2  | 4  | 22 | 40 | GCA_003313645.1 |                                                                                                                                                                                                                                                                                                                                                                                                                                                                                                                                                                                                                                                                                                                                                                                                                                                                                                                                                                                                                                                                                                                                                                               |
| 1535 | <i>Rhizopogon vulgaris</i>                | Agarico     | Basidio | 10 | 1  | 3  | 26 | 40 | GCA_002995295.1 |                                                                                                                                                                                                                                                                                                                                                                                                                                                                                                                                                                                                                                                                                                                                                                                                                                                                                                                                                                                                                                                                                                                                                                               |
| 1536 | <i>Rhizopogon hawkerae</i>                | Agarico     | Basidio | 10 | 4  | 4  | 22 | 40 | GCA_002995035.1 |                                                                                                                                                                                                                                                                                                                                                                                                                                                                                                                                                                                                                                                                                                                                                                                                                                                                                                                                                                                                                                                                                                                                                                               |
| 1537 | <i>Neoboletus magnificus</i>              | Agarico     | Basidio | 10 | 0  | 2  | 28 | 40 | GCA_003316145.1 |                                                                                                                                                                                                                                                                                                                                                                                                                                                                                                                                                                                                                                                                                                                                                                                                                                                                                                                                                                                                                                                                                                                                                                               |
| 1538 | <i>Escovopsis sp. TC</i>                  | Sordario    | Asco    | 16 | 6  | 9  | 8  | 39 | GCA_003055185.1 |                                                                                                                                                                                                                                                                                                                                                                                                                                                                                                                                                                                                                                                                                                                                                                                                                                                                                                                                                                                                                                                                                                                                                                               |
| 1539 | <i>Ophiocordyceps camponoti-rufipedis</i> | Sordario    | Asco    | 10 | 6  | 3  | 20 | 39 | GCA_002591395.1 |                                                                                                                                                                                                                                                                                                                                                                                                                                                                                                                                                                                                                                                                                                                                                                                                                                                                                                                                                                                                                                                                                                                                                                               |
| 1540 | <i>Elaphomyces granulatus</i>             | Eurotio     | Asco    | 10 | 4  | 2  | 23 | 39 | GCA_002240705.1 |                                                                                                                                                                                                                                                                                                                                                                                                                                                                                                                                                                                                                                                                                                                                                                                                                                                                                                                                                                                                                                                                                                                                                                               |
| 1541 | <i>Leucosporidium creatinivorum</i>       | Microbotryo | Basidio | 10 | 6  | 2  | 21 | 39 | GCA_001600635.1 |                                                                                                                                                                                                                                                                                                                                                                                                                                                                                                                                                                                                                                                                                                                                                                                                                                                                                                                                                                                                                                                                                                                                                                               |
| 1542 | <i>Neohortaea acidophila</i>              | Dothideo    | Asco    | 10 | 10 | 3  | 16 | 39 | GCA_010093505.1 |                                                                                                                                                                                                                                                                                                                                                                                                                                                                                                                                                                                                                                                                                                                                                                                                                                                                                                                                                                                                                                                                                                                                                                               |
| 1543 | <i>Taiwanofungus camphoratus</i>          | Agarico     | Basidio | 14 | 2  | 7  | 16 | 39 | GCA_000766995.1 |                                                                                                                                                                                                                                                                                                                                                                                                                                                                                                                                                                                                                                                                                                                                                                                                                                                                                                                                                                                                                                                                                                                                                                               |
| 1544 | <i>Rhizopogon parksii</i>                 | Agarico     | Basidio | 10 | 4  | 3  | 22 | 39 | GCA_002994865.1 |                                                                                                                                                                                                                                                                                                                                                                                                                                                                                                                                                                                                                                                                                                                                                                                                                                                                                                                                                                                                                                                                                                                                                                               |
| 1545 | <i>Lactifluus hygrophoroides</i>          | Agarico     | Basidio | 10 | 0  | 1  | 28 | 39 | GCA_003314055.1 |                                                                                                                                                                                                                                                                                                                                                                                                                                                                                                                                                                                                                                                                                                                                                                                                                                                                                                                                                                                                                                                                                                                                                                               |
| 1546 | <i>Lactarius piperatus</i>                | Agarico     | Basidio | 8  | 0  | 0  | 31 | 39 | GCA_003315875.1 |                                                                                                                                                                                                                                                                                                                                                                                                                                                                                                                                                                                                                                                                                                                                                                                                                                                                                                                                                                                                                                                                                                                                                                               |
| 1547 | <i>Ophiocordyceps australis</i>           | Sordario    | Asco    | 15 | 4  | 3  | 16 | 38 | GCA_002591415.1 |                                                                                                                                                                                                                                                                                                                                                                                                                                                                                                                                                                                                                                                                                                                                                                                                                                                                                                                                                                                                                                                                                                                                                                               |
| 1548 | <i>Ustilago maydis</i>                    | Ustilagino  | Basidio | 10 | 5  | 6  | 17 | 38 | GCA_001599495.1 |                                                                                                                                                                                                                                                                                                                                                                                                                                                                                                                                                                                                                                                                                                                                                                                                                                                                                                                                                                                                                                                                                                                                                                               |

|      |                                                    |               |           |    |    |    |    |    |                 |                                                                                       |
|------|----------------------------------------------------|---------------|-----------|----|----|----|----|----|-----------------|---------------------------------------------------------------------------------------|
| 1549 | <i>Sporisorium scitamineum</i>                     | Ustilagino    | Basidio   | 10 | 10 | 4  | 14 | 38 | GCA_000772675.1 | Key Lab of Sugarcane Biology and Genetic Breeding, Ministry of Agriculture, P.R.China |
| 1550 | <i>Kockovaella imperatae</i>                       | Tremello      | Basidio   | 8  | 10 | 10 | 10 | 38 | GCA_002102565.1 | DOE Joint Genome Institute                                                            |
| 1551 | <i>Kwonella heveanensis</i>                        | Tremello      | Basidio   | 8  | 12 | 6  | 12 | 38 | GCA_000507405.3 | Broad Institute                                                                       |
| 1552 | <i>Tricholoma saponaceum</i>                       | Agarico       | Basidio   | 13 | 2  | 3  | 20 | 38 | GCA_003313625.1 | Kunming University of Science and Technology                                          |
| 1553 | <i>Ustilago bromivora</i>                          | Ustilagino    | Basidio   | 10 | 8  | 6  | 14 | 38 | GCA_900101485.1 | Institute of Bioinformatics and Systems Biology                                       |
| 1554 | <i>Russula abietina</i>                            | Agarico       | Basidio   | 7  | 0  | 2  | 29 | 38 | GCA_003313715.1 | Kunming University of Science and Technology                                          |
| 1555 | <i>Powellomyces hirtus</i>                         | Chytridio     | Chytridio | 9  | 12 | 1  | 16 | 38 | GCA_006536005.1 | Agriculture and Agri-Food Canada                                                      |
| 1556 | <i>Pulveroboletus ravenelii</i>                    | Agarico       | Basidio   | 6  | 2  | 4  | 26 | 38 | GCA_003316545.1 | Kunming University of Science and Technology                                          |
| 1557 | <i>Conidiobolus incongruus</i>                     | Entomophthoro | Zoopago   | 7  | 2  | 1  | 27 | 37 | GCA_000697335.1 | IGS                                                                                   |
| 1558 | <i>Metarhizium album</i>                           | Sordario      | Asco      | 11 | 4  | 6  | 16 | 37 | GCA_000804445.1 | Shanghai Institutes for Biological Sciences, CAS                                      |
| 1559 | <i>Escovopsis weberi</i>                           | Sordario      | Asco      | 15 | 4  | 7  | 11 | 37 | GCA_003055145.1 | University of East Anglia                                                             |
| 1560 | <i>Ophiocordyceps camponoti-floridani</i>          | Sordario      | Asco      | 9  | 6  | 3  | 19 | 37 | GCA_012980515.1 | University of Central Florida                                                         |
| 1561 | <i>Ophiocordyceps unilateralis</i>                 | Sordario      | Asco      | 10 | 4  | 3  | 20 | 37 | GCA_001272575.2 | Utrecht University                                                                    |
| 1562 | <i>Monascus ruber</i>                              | Eurotio       | Asco      | 9  | 10 | 4  | 14 | 37 | GCA_002976275.1 | Fujian Institute of Microbiology                                                      |
| 1563 | <i>Apiotrichum domesticum</i>                      | Tremello      | Basidio   | 9  | 2  | 12 | 14 | 37 | GCA_001599015.1 | RIKEN Center for Life Science Technologies, Division of Genomic Technologies          |
| 1564 | <i>Trichosporon asahii</i>                         | Tremello      | Basidio   | 11 | 4  | 4  | 18 | 37 | GCA_001972365.1 | RIKEN Center for Life Science Technologies, Division of Genomic Technologies          |
| 1565 | <i>Trichosporon faecale</i>                        | Tremello      | Basidio   | 10 | 5  | 4  | 18 | 37 | GCA_001752585.1 | RIKEN Center for Life Science Technologies, Division of Genomic Technologies          |
| 1566 | <i>Cerataphis brasiliensis yeast-like symbiont</i> | 0             | Asco      | 8  | 4  | 4  | 21 | 37 | GCA_000372705.1 | University of Arizona                                                                 |
| 1567 | <i>Ustilago vetiveriae</i>                         | Ustilagino    | Basidio   | 12 | 7  | 6  | 12 | 37 | GCA_001735935.1 | RWTH Aachen University                                                                |
| 1568 | <i>Russula virescens</i>                           | Agarico       | Basidio   | 10 | 0  | 1  | 26 | 37 | GCA_003316435.1 | Kunming University of Science and Technology                                          |
| 1569 | <i>Ascodesmis nigricans</i>                        | Pezizo        | Asco      | 14 | 6  | 5  | 12 | 37 | GCA_004786065.1 | DOE Joint Genome Institute                                                            |
| 1570 | <i>Leucoagaricus gongylophorus</i>                 | Agarico       | Basidio   | 12 | 3  | 7  | 15 | 37 | GCA_000382605.1 | UW-Madison                                                                            |
| 1571 | <i>Ceratocystiopsis brevicomis</i>                 | Sordario      | Asco      | 8  | 12 | 2  | 14 | 36 | GCA_002778105.1 | University of Montana                                                                 |
| 1572 | <i>Blastomyces emzantsi</i>                        | Eurotio       | Asco      | 10 | 5  | 7  | 14 | 36 | GCA_003206725.1 | National Institute for Communicable Diseases                                          |
| 1573 | <i>Apiotrichum montevidense</i>                    | Tremello      | Basidio   | 9  | 2  | 12 | 13 | 36 | GCA_001598995.1 | RIKEN Center for Life Science Technologies, Division of Genomic Technologies          |
| 1574 | <i>Ramalina peruviana</i>                          | Lecanoro      | Asco      | 10 | 4  | 2  | 20 | 36 | GCA_001956345.1 | Yunnan Academy of Forestry                                                            |

|      |                                        |              |         |    |    |   |    |    |                 |                                                                              |
|------|----------------------------------------|--------------|---------|----|----|---|----|----|-----------------|------------------------------------------------------------------------------|
| 1575 | <i>Umbilicaria muehlenbergii</i>       | Lecanoro     | Asco    | 12 | 2  | 2 | 20 | 36 | GCA_000611775.1 | Seoul National University                                                    |
| 1576 | <i>Lasallia hispanica</i>              | Lecanoro     | Asco    | 10 | 2  | 2 | 22 | 36 | GCA_003254425.1 | Senckenberg                                                                  |
| 1577 | <i>Cutaneotrichosporon oleaginosum</i> | Tremello     | Basidio | 7  | 4  | 8 | 17 | 36 | GCA_008065305.1 | Ruhr-University Bochum                                                       |
| 1578 | <i>Hebeloma cylindrosporum</i>         | Agarico      | Basidio | 12 | 2  | 2 | 20 | 36 | GCA_000827355.1 | DOE Joint Genome Institute                                                   |
| 1579 | <i>Rhizopogon salebrosus</i>           | Agarico      | Basidio | 12 | 2  | 2 | 20 | 36 | GCA_002995475.1 | Oregon State University                                                      |
| 1580 | <i>Lactarius echinatus</i>             | Agarico      | Basidio | 10 | 1  | 1 | 24 | 36 | GCA_003315975.1 | Kunming University of Science and Technology                                 |
| 1581 | <i>Tremella fuciformis</i>             | Tremello     | Basidio | 15 | 4  | 7 | 9  | 35 | GCA_000987905.1 | Fujian Agriculture and Forestry University                                   |
| 1582 | <i>Ramalina intermedia</i>             | Lecanoro     | Asco    | 10 | 3  | 2 | 20 | 35 | GCA_003073195.1 | Yunnan Academy of Forestry                                                   |
| 1583 | <i>Tuber calosporum</i>                | Pezizo       | Asco    | 12 | 8  | 1 | 14 | 35 | GCA_003316355.1 | Kunming University of Science and Technology                                 |
| 1584 | <i>Chaetothyriales sp. CBS 134920</i>  | Eurotio      | Asco    | 12 | 3  | 2 | 18 | 35 | GCA_003693665.1 | Westerdijk Fungal Biodiversity Institute                                     |
| 1585 | <i>Phycomyces blakesleeanus</i>        | Mucoro       | Mucoro  | 8  | 14 | 0 | 13 | 35 | GCA_001638985.2 | JGI-PSF                                                                      |
| 1586 | <i>Cutaneotrichosporon cyanovorans</i> | Tremello     | Basidio | 9  | 4  | 5 | 17 | 35 | GCA_002335625.1 | RIKEN Center for Life Science Technologies, Division of Genomic Technologies |
| 1587 | <i>Mrakia frigida</i>                  | Tremello     | Basidio | 8  | 10 | 3 | 14 | 35 | GCA_001600395.1 | RIKEN Center for Life Science Technologies, Division of Genomic Technologies |
| 1588 | <i>Naganishia sp. IF7SW-B1</i>         | Tremello     | Basidio | 10 | 12 | 5 | 8  | 35 | GCA_012922685.1 | Jet Propulsion Laboratory, California Institute of Technology                |
| 1589 | <i>Naganishia adeliensis</i>           | Tremello     | Basidio | 10 | 12 | 5 | 8  | 35 | GCA_012922715.1 | Jet Propulsion Laboratory, California Institute of Technology                |
| 1590 | <i>Glomus cerebriforme</i>             | Glomero      | Mucoro  | 4  | 1  | 0 | 30 | 35 | GCA_003833025.1 | University of Ottawa                                                         |
| 1591 | <i>Lactarius volemus</i>               | Agarico      | Basidio | 5  | 0  | 1 | 29 | 35 | GCA_003315835.1 | Kunming University of Science and Technology                                 |
| 1592 | <i>Diversispora epigaea</i>            | Glomero      | Mucoro  | 4  | 1  | 0 | 30 | 35 | GCA_003547095.1 | Cornell University                                                           |
| 1593 | <i>Erythrobasidium hasegawianum</i>    | Cystobasidio | Basidio | 10 | 2  | 6 | 16 | 34 | GCA_001972285.1 | RIKEN Center for Life Science Technologies, Division of Genomic Technologies |
| 1594 | <i>Escovopsis sp. AC</i>               | Sordario     | Asco    | 15 | 4  | 5 | 10 | 34 | GCA_003055955.1 | University of East Anglia                                                    |
| 1595 | <i>Lichtheimia ramosa</i>              | Mucoro       | Mucoro  | 6  | 12 | 2 | 14 | 34 | GCA_000945115.1 | HKI JENA                                                                     |
| 1596 | <i>Apophysomyces elegans</i>           | Mucoro       | Mucoro  | 16 | 0  | 0 | 18 | 34 | GCA_000696995.1 | IGS                                                                          |
| 1597 | <i>Apophysomyces variabilis</i>        | Mucoro       | Mucoro  | 16 | 0  | 0 | 18 | 34 | GCA_002749535.1 | Postgraduate Institute of medical education and research                     |
| 1598 | <i>Choanephora cucurbitarum</i>        | Mucoro       | Mucoro  | 9  | 10 | 0 | 15 | 34 | GCA_001683725.1 | Korea University                                                             |
| 1599 | <i>Cryptococcus amylolentus</i>        | Tremello     | Basidio | 9  | 8  | 4 | 13 | 34 | GCA_001720205.1 | Broad Institute                                                              |
| 1600 | <i>Cryptococcus floricola</i>          | Tremello     | Basidio | 8  | 8  | 4 | 14 | 34 | GCA_006352305.1 | Duke University                                                              |



|      |                                               |              |           |    |    |   |    |    |                 |                                                                              |
|------|-----------------------------------------------|--------------|-----------|----|----|---|----|----|-----------------|------------------------------------------------------------------------------|
| 1601 | <i>Naganishia liquefaciens</i>                | Tremello     | Basidio   | 10 | 12 | 4 | 8  | 34 | GCA_013423385.1 | School of Life Science and Technology, Tokyo Institute of Technology         |
| 1602 | <i>Hygrocybe conica</i>                       | Agarico      | Basidio   | 4  | 6  | 2 | 22 | 34 | GCA_900068975.1 | Royal Botanic Gardens, Kew                                                   |
| 1603 | <i>Ascospaera apis</i>                        | Eurotio      | Asco      | 4  | 18 | 2 | 10 | 34 | GCA_001636715.1 | Shanghai Institutes for Biological Sciences, CAS                             |
| 1604 | <i>Escovopsis sp. Ae720</i>                   | Sordario     | Asco      | 15 | 2  | 5 | 11 | 33 | GCA_003055925.1 | University of East Anglia                                                    |
| 1605 | <i>Escovopsis sp. Ae733</i>                   | Sordario     | Asco      | 15 | 2  | 5 | 11 | 33 | GCA_003055945.1 | University of East Anglia                                                    |
| 1606 | <i>Lichtheimia corymbifera</i>                | Mucoro       | Mucoro    | 6  | 11 | 2 | 14 | 33 | GCA_000697175.1 | IGS                                                                          |
| 1607 | <i>Tilletia indica</i>                        | Exobasidio   | Basidio   | 11 | 2  | 2 | 18 | 33 | GCA_001689995.1 | ICAR-Indian Institute of Wheat and Barley Research, Karnal                   |
| 1608 | <i>Jimgerdemannia lactiflua</i>               | Endogono     | Mucoro    | 7  | 6  | 3 | 17 | 33 | GCA_003951145.1 | Oregon State University                                                      |
| 1609 | <i>Endocarpon pusillum</i>                    | Eurotio      | Asco      | 12 | 2  | 0 | 19 | 33 | GCA_000611755.1 | Seoul National University                                                    |
| 1610 | <i>Terfezia boudieri</i>                      | Pezizo       | Asco      | 11 | 8  | 6 | 8  | 33 | GCA_003788615.2 | DOE Joint Genome Institute                                                   |
| 1611 | <i>Alectoria sarmentosa</i>                   | Lecanoro     | Asco      | 11 | 2  | 2 | 18 | 33 | GCA_009733775.1 | Universidad Complutense de Madrid                                            |
| 1612 | <i>Nilaparvata lugens yeast-like symbiont</i> | 0            | Asco      | 8  | 4  | 4 | 17 | 33 | GCA_000758425.1 | Nilaparvata lugens Genome Consortium                                         |
| 1613 | <i>Entoloma clypeatum</i>                     | Agarico      | Basidio   | 12 | 4  | 1 | 16 | 33 | GCA_900068945.1 | Royal Botanic Gardens, Kew                                                   |
| 1614 | <i>Phlebopus portentosus</i>                  | Agarico      | Basidio   | 6  | 2  | 1 | 24 | 33 | GCA_000766925.2 | Yunnan University                                                            |
| 1615 | <i>Tricholoma matsutake</i>                   | Agarico      | Basidio   | 14 | 2  | 2 | 15 | 33 | GCA_002939025.2 | Korea University                                                             |
| 1616 | <i>Tilletia controversa</i>                   | Exobasidio   | Basidio   | 8  | 7  | 1 | 16 | 32 | GCA_001645045.2 | Agriculture and Agri-Food Canada                                             |
| 1617 | <i>Cystobasidiaceae sp. HBUAS51001</i>        | Cystobasidio | Basidio   | 8  | 2  | 5 | 17 | 32 | GCA_003351005.1 | Hubei University of Arts and Science                                         |
| 1618 | <i>Escovopsis sp. Ae724</i>                   | Sordario     | Asco      | 14 | 2  | 5 | 11 | 32 | GCA_003055165.1 | University of East Anglia                                                    |
| 1619 | <i>Tolypocladium capitatum</i>                | Sordario     | Asco      | 10 | 4  | 6 | 12 | 32 | GCA_002901185.1 | Oregon State University                                                      |
| 1620 | <i>Chytriumyces confervae</i>                 | Chytridio    | Chytridio | 2  | 12 | 2 | 16 | 32 | GCA_006535975.1 | Agriculture and Agri-Food Canada                                             |
| 1621 | <i>Tilletia caries</i>                        | Exobasidio   | Basidio   | 8  | 7  | 1 | 16 | 32 | GCA_001645005.2 | Agriculture and Agri-Food Canada                                             |
| 1622 | <i>Trichosporon inkin</i>                     | Tremello     | Basidio   | 8  | 4  | 2 | 18 | 32 | GCA_001752625.1 | RIKEN Center for Life Science Technologies, Division of Genomic Technologies |
| 1623 | <i>Thecaphora thlaspeos</i>                   | Ustilagino   | Basidio   | 9  | 10 | 1 | 12 | 32 | GCA_900260175.1 | RWTH Aachen University                                                       |
| 1624 | <i>Lasallia pustulata</i>                     | Lecanoro     | Asco      | 10 | 2  | 2 | 18 | 32 | GCA_008636195.1 | University of Frankfurt                                                      |
| 1625 | <i>Emmonsia crescens</i>                      | Eurotio      | Asco      | 10 | 6  | 4 | 12 | 32 | GCA_002572855.1 | Broad Institute                                                              |
| 1626 | <i>Rhodotorula paludigena</i>                 | Microbotryo  | Basidio   | 8  | 4  | 4 | 16 | 32 | GCA_005281665.1 | Suranaree University of Technology                                           |
| 1627 | <i>Kwoniella shandongensis</i>                | Tremello     | Basidio   | 8  | 8  | 4 | 12 | 32 | GCA_008629635.1 | Broad Institute                                                              |
| 1628 | <i>Microbotryum silenes-dioicae</i>           | Microbotryo  | Basidio   | 8  | 5  | 1 | 18 | 32 | GCA_900120095.1 | ESE                                                                          |
| 1629 | <i>Absidia repens</i>                         | Mucoro       | Mucoro    | 8  | 1  | 0 | 22 | 31 | GCA_002105175.1 | DOE Joint Genome Institute                                                   |
| 1630 | <i>Rhizomucor pusillus</i>                    | Mucoro       | Mucoro    | 7  | 8  | 0 | 16 | 31 | GCA_900175165.2 | CHALMERS UNIVERSITY OF TECHNOLOGY                                            |

|      |                                       |            |         |    |    |   |    |    |                 |                                                                                |
|------|---------------------------------------|------------|---------|----|----|---|----|----|-----------------|--------------------------------------------------------------------------------|
| 1631 | <i>Ustilago esculenta</i>             | Ustilagino | Basidio | 8  | 5  | 2 | 16 | 31 | GCA_000819925.1 | Zhejiang Provincial Key Laboratory of Biometrology and Inspection & Quarantine |
| 1632 | <i>Emergomyces orientalis</i>         | Eurotio    | Asco    | 11 | 5  | 3 | 12 | 31 | GCA_002110485.1 | Beijing Institute of Radiation Medicine                                        |
| 1633 | <i>Laccaria bicolor</i>               | Agarico    | Basidio | 6  | 1  | 0 | 24 | 31 | GCA_000143565.1 | Laccaria Genome Consortium                                                     |
| 1634 | <i>Smittium culicis</i>               | Harpello   | Zoopago | 1  | 0  | 0 | 30 | 31 | GCA_001970855.1 | University of Toronto                                                          |
| 1635 | <i>Hygrophorus pudorinus</i>          | Agarico    | Basidio | 6  | 4  | 1 | 20 | 31 | GCA_003314045.1 | Kunming University of Science and Technology                                   |
| 1636 | <i>Melampsora pinitorqua</i>          | Puccinio   | Basidio | 6  | 12 | 5 | 8  | 31 | GCA_000464645.1 | Tree Aggressors Identification using Genomic Approaches                        |
| 1637 | <i>Lactifluus rugatus</i>             | Agarico    | Basidio | 7  | 1  | 2 | 21 | 31 | GCA_003315895.1 | Kunming University of Science and Technology                                   |
| 1638 | <i>Russula lepida</i>                 | Agarico    | Basidio | 8  | 0  | 2 | 21 | 31 | GCA_003316425.1 | Kunming University of Science and Technology                                   |
| 1639 | <i>Mucor velutinosus</i>              | Mucoro     | Mucoro  | 6  | 2  | 2 | 20 | 30 | GCA_000696895.1 | IGS                                                                            |
| 1640 | <i>Mucor circinelloides</i>           | Mucoro     | Mucoro  | 8  | 2  | 0 | 20 | 30 | GCA_001599575.1 | RIKEN Center for Life Science Technologies, Division of Genomic Technologies   |
| 1641 | <i>Mucor irregularis</i>              | Mucoro     | Mucoro  | 8  | 1  | 1 | 20 | 30 | GCA_000587855.1 | Nanjing Biozeron                                                               |
| 1642 | <i>Jimgerdemannia flammicorona</i>    | Endogono   | Mucoro  | 3  | 6  | 4 | 17 | 30 | GCA_003990745.1 | DOE Joint Genome Institute                                                     |
| 1643 | <i>Chaetothyriales sp. CBS 134916</i> | Eurotio    | Asco    | 10 | 0  | 2 | 18 | 30 | GCA_003709845.1 | Westerdijk Fungal Biodiversity Institute                                       |
| 1644 | <i>Apophysomyces trapeziformis</i>    | Mucoro     | Mucoro  | 12 | 0  | 0 | 18 | 30 | GCA_000696975.1 | IGS                                                                            |
| 1645 | <i>Chaetothyriales sp. CBS 135597</i> | Eurotio    | Asco    | 10 | 3  | 1 | 16 | 30 | GCA_003709825.1 | Westerdijk Fungal Biodiversity Institute                                       |
| 1646 | <i>Thermomyces lanuginosus</i>        | Eurotio    | Asco    | 11 | 4  | 3 | 12 | 30 | GCA_000315935.1 | Durban University of Technology                                                |
| 1647 | <i>Naganishia albida</i>              | Tremello   | Basidio | 8  | 8  | 4 | 10 | 30 | GCA_001599735.1 | RIKEN Center for Life Science Technologies, Division of Genomic Technologies   |
| 1648 | <i>Blastomyces silvaeae</i>           | Eurotio    | Asco    | 10 | 5  | 3 | 12 | 30 | GCA_001014755.1 | Broad Institute                                                                |
| 1649 | <i>Emergomyces pasteurianus</i>       | Eurotio    | Asco    | 11 | 4  | 2 | 13 | 30 | GCA_001883825.1 | Broad Institute                                                                |
| 1650 | <i>Rhizopogon fuscorubens</i>         | Agarico    | Basidio | 8  | 0  | 2 | 20 | 30 | GCA_002995455.1 | Oregon State University                                                        |
| 1651 | <i>Rhizophagus irregularis</i>        | Glomero    | Mucoro  | 3  | 1  | 0 | 26 | 30 | GCA_002897155.1 | NIBB core research facilities, National Institutes for Basic Biology           |
| 1652 | <i>Tricholoma terreum</i>             | Agarico    | Basidio | 6  | 2  | 2 | 20 | 30 | GCA_003316345.1 | Kunming University of Science and Technology                                   |
| 1653 | <i>Rhizophagus clarus</i>             | Glomero    | Mucoro  | 6  | 1  | 0 | 23 | 30 | GCA_003203555.1 | National Institute for Basic Biology                                           |
| 1654 | <i>Pyrrhoderma noxium</i>             | Agarico    | Basidio | 9  | 4  | 0 | 17 | 30 | GCA_002287475.2 | Academia Sinica                                                                |
| 1655 | <i>Chrysosporium queenslandicum</i>   | Eurotio    | Asco    | 8  | 1  | 2 | 18 | 29 | GCA_001430955.1 | UC Berkeley                                                                    |
| 1656 | <i>Cryptococcus wingfieldii</i>       | Tremello   | Basidio | 4  | 8  | 4 | 13 | 29 | GCA_001720155.1 | Broad Institute                                                                |

|      |                                       |              |              |    |    |   |    |    |                 |                                                                                                                          |
|------|---------------------------------------|--------------|--------------|----|----|---|----|----|-----------------|--------------------------------------------------------------------------------------------------------------------------|
| 1657 | <i>Erythrobasidium yunnanense</i>     | Cystobasidio | Basidio      | 8  | 4  | 5 | 12 | 29 | GCA_001600175.1 | RIKEN Center for Life Science<br>Technologies, Division of<br>Genomic Technologies                                       |
| 1658 | <i>Naganishia randhawae</i>           | Tremello     | Basidio      | 8  | 10 | 2 | 9  | 29 | GCA_013461525.1 | Wits University                                                                                                          |
| 1659 | <i>Microbotryum saponariae</i>        | Microbotryo  | Basidio      | 8  | 3  | 1 | 17 | 29 | GCA_900102585.1 | ESE                                                                                                                      |
| 1660 | <i>Tricholoma sp. MG99</i>            | Agarico      | Basidio      | 11 | 0  | 1 | 17 | 29 | GCA_003521275.1 | Kunming University of Science<br>and Technology                                                                          |
| 1661 | <i>Laccaria amethystina</i>           | Agarico      | Basidio      | 8  | 1  | 2 | 18 | 29 | GCA_000827195.1 | DOE Joint Genome Institute                                                                                               |
| 1662 | <i>Allomyces macrogynus</i>           | Blastocladio | Blastocladio | 2  | 7  | 9 | 10 | 28 | GCA_000151295.1 | Broad Institute                                                                                                          |
| 1663 | <i>Amauroascus niger</i>              | Eurotio      | Asco         | 8  | 2  | 1 | 17 | 28 | GCA_001430945.1 | UC Berkeley                                                                                                              |
| 1664 | <i>Rhizomucor miehei</i>              | Mucoro       | Mucoro       | 6  | 8  | 2 | 12 | 28 | GCA_000611695.1 | Department of Biotechnology,<br>College of Food Science and<br>Nutritional Engineering, China<br>Agricultural University |
| 1665 | <i>Rhizopus microsporus</i>           | Mucoro       | Mucoro       | 12 | 6  | 0 | 10 | 28 | GCA_006680115.1 | TGen-North                                                                                                               |
| 1666 | <i>Thermomucor indicae-seudaticae</i> | Mucoro       | Mucoro       | 4  | 8  | 2 | 14 | 28 | GCA_000787465.1 | Aalborg University                                                                                                       |
| 1667 | <i>Rhodotorula graminis</i>           | Microbotryo  | Basidio      | 6  | 5  | 5 | 12 | 28 | GCA_001329695.1 | DOE Joint Genome Institute                                                                                               |
| 1668 | <i>Ceraceosorus guamensis</i>         | Exobasidio   | Basidio      | 8  | 4  | 1 | 15 | 28 | GCA_003144195.1 | DOE Joint Genome Institute                                                                                               |
| 1669 | <i>Blastomyces parvus</i>             | Eurotio      | Asco         | 10 | 5  | 3 | 10 | 28 | GCA_002572885.1 | Broad Institute                                                                                                          |
| 1670 | <i>Cutaneotrichosporon curvatum</i>   | Tremello     | Basidio      | 8  | 4  | 4 | 12 | 28 | GCA_001600275.1 | RIKEN Center for Life Science<br>Technologies, Division of<br>Genomic Technologies                                       |
| 1671 | <i>Coemansia reversa</i>              | Kickxello    | Zoopago      | 4  | 2  | 0 | 22 | 28 | GCA_002705745.1 | JGI                                                                                                                      |
| 1672 | <i>Cetradonia linearis</i>            | Lecanoro     | Asco         | 7  | 2  | 1 | 18 | 28 | GCA_003521265.1 | The New York Botanical Garden                                                                                            |
| 1673 | <i>Blyttomyces helicus</i>            | Chytridio    | Chytridio    | 6  | 4  | 0 | 18 | 28 | GCA_003614705.1 | DOE Joint Genome Institute                                                                                               |
| 1674 | <i>Microbotryum silenae-acaulis</i>   | Microbotryo  | Basidio      | 6  | 5  | 1 | 16 | 28 | GCA_003665825.1 | Universite Paris Sud                                                                                                     |
| 1675 | <i>Naematelia encephala</i>           | Tremello     | Basidio      | 4  | 12 | 4 | 8  | 28 | GCA_002105065.1 | DOE Joint Genome Institute                                                                                               |
| 1676 | <i>Filobasidium wieringae</i>         | Tremello     | Basidio      | 10 | 6  | 6 | 6  | 28 | GCA_001600055.1 | RIKEN Center for Life Science<br>Technologies, Division of<br>Genomic Technologies                                       |
| 1677 | <i>Chaetothyriales sp. CBS 132003</i> | Eurotio      | Asco         | 8  | 0  | 1 | 18 | 27 | GCA_003709865.1 | Westerdijk Fungal Biodiversity<br>Institute                                                                              |
| 1678 | <i>Ceraceosorus bombacis</i>          | Exobasidio   | Basidio      | 8  | 3  | 1 | 15 | 27 | GCA_900000165.1 | IPF                                                                                                                      |
| 1679 | <i>Blastomyces percursus</i>          | Eurotio      | Asco         | 8  | 7  | 2 | 10 | 27 | GCA_001883805.1 | Broad Institute                                                                                                          |
| 1680 | <i>Scleroderma citrinum</i>           | Agarico      | Basidio      | 4  | 1  | 5 | 17 | 27 | GCA_000827425.1 | DOE Joint Genome Institute                                                                                               |
| 1681 | <i>Microbotryum intermedium</i>       | Microbotryo  | Basidio      | 6  | 4  | 1 | 16 | 27 | GCA_900096595.1 | ESE                                                                                                                      |
| 1682 | <i>Mucor lusitanicus</i>              | Mucoro       | Mucoro       | 6  | 2  | 0 | 18 | 26 | GCA_010203745.1 | DOE Joint Genome Institute                                                                                               |
| 1683 | <i>Drechmeria coniospora</i>          | Sordario     | Asco         | 8  | 5  | 1 | 12 | 26 | GCA_001625195.1 | Biotechnology Research<br>Institute, Chinese Academy of<br>Agricultural Sciences                                         |
| 1684 | <i>Parasitella parasitica</i>         | Mucoro       | Mucoro       | 6  | 1  | 1 | 18 | 26 | GCA_000938895.1 | FRIEDRICH SCHILLER<br>UNIVERSITY JENA                                                                                    |
| 1685 | <i>Aspergillus cejpaii</i>            | Eurotio      | Asco         | 10 | 4  | 0 | 12 | 26 | GCA_004769165.1 | Guangdong Institute of<br>Microbiology                                                                                   |

|      |                                          |               |         |    |   |   |    |    |                 |                                                                              |
|------|------------------------------------------|---------------|---------|----|---|---|----|----|-----------------|------------------------------------------------------------------------------|
| 1686 | <i>Antarctomyces pellizariae</i>         | Leotio        | Asco    | 13 | 5 | 0 | 8  | 26 | GCA_010623925.1 | UFMG - Universidade Federal de Minas Gerais                                  |
| 1687 | <i>Histoplasma capsulatum</i>            | Eurotio       | Asco    | 9  | 3 | 2 | 12 | 26 | GCA_000313325.1 | Taipei Medical University                                                    |
| 1688 | <i>Blastomyces gilchristii</i>           | Eurotio       | Asco    | 10 | 4 | 2 | 10 | 26 | GCA_000003855.2 | Broad Institute                                                              |
| 1689 | <i>Tricholoma sp. MG77</i>               | Agarico       | Basidio | 6  | 2 | 0 | 18 | 26 | GCA_003314665.1 | Kunming University of Science and Technology                                 |
| 1690 | <i>Sarcodon aspratus</i>                 | Agarico       | Basidio | 6  | 2 | 5 | 13 | 26 | GCA_003313825.1 | Kunming University of Science and Technology                                 |
| 1691 | <i>Kwoniella bestiolae</i>               | Tremello      | Basidio | 4  | 8 | 4 | 10 | 26 | GCA_000512585.2 | Broad Institute                                                              |
| 1692 | <i>Basidiobolus heterosporus</i>         | Basidiobolo   | Zoopago | 6  | 0 | 1 | 18 | 25 | GCA_000697455.1 | IGS                                                                          |
| 1693 | <i>Mucor ambiguus</i>                    | Mucoro        | Mucoro  | 7  | 2 | 0 | 16 | 25 | GCA_000950595.1 | National Institute of Advanced Industrial Science and Technology (AIST)      |
| 1694 | <i>Actinomucor elegans</i>               | Mucoro        | Mucoro  | 6  | 2 | 0 | 17 | 25 | GCA_001599635.1 | RIKEN Center for Life Science Technologies, Division of Genomic Technologies |
| 1695 | <i>Quambalaria eucalypti</i>             | Exobasidio    | Basidio | 4  | 8 | 1 | 12 | 25 | GCA_004016185.1 | University of Pretoria                                                       |
| 1696 | <i>Jaminaea rosea</i>                    | Exobasidio    | Basidio | 6  | 8 | 1 | 10 | 25 | GCA_003144245.1 | DOE Joint Genome Institute                                                   |
| 1697 | <i>Holtermannia corniformis</i>          | Tremello      | Basidio | 9  | 4 | 1 | 11 | 25 | GCA_001599935.1 | RIKEN Center for Life Science Technologies, Division of Genomic Technologies |
| 1698 | <i>Cryptococcus neoformans AD hybrid</i> | Tremello      | Basidio | 5  | 2 | 0 | 18 | 25 | GCA_006992865.1 | Weill Cornell Medicine                                                       |
| 1699 | <i>Kwoniella dejecticola</i>             | Tremello      | Basidio | 5  | 8 | 2 | 10 | 25 | GCA_000512565.2 | Broad Institute                                                              |
| 1700 | <i>Salmacisia buchloeana</i>             | Exobasidio    | Basidio | 9  | 2 | 0 | 13 | 24 | GCA_001990185.1 | Pennsylvania State University                                                |
| 1701 | <i>Entomophthora muscae</i>              | Entomophthoro | Zoopago | 6  | 0 | 0 | 18 | 24 | GCA_900018355.1 | UNIVERSITY OF COPENHAGEN                                                     |
| 1702 | <i>Saksenaea vasiformis</i>              | Mucoro        | Mucoro  | 8  | 0 | 0 | 16 | 24 | GCA_000697055.1 | IGS                                                                          |
| 1703 | <i>Saksenaea oblongispora</i>            | Mucoro        | Mucoro  | 8  | 0 | 0 | 16 | 24 | GCA_000697495.1 | IGS                                                                          |
| 1704 | <i>Cystobasidiopsis lactophilus</i>      | Agaricostilbo | Basidio | 6  | 1 | 1 | 16 | 24 | GCA_001599975.1 | RIKEN Center for Life Science Technologies, Division of Genomic Technologies |
| 1705 | <i>Endogone sp. FLAS-F59071</i>          | Endogono      | Mucoro  | 4  | 3 | 1 | 16 | 24 | GCA_003990785.1 | DOE Joint Genome Institute                                                   |
| 1706 | <i>Blastomyces dermatitidis</i>          | Eurotio       | Asco    | 8  | 4 | 2 | 10 | 24 | GCA_000003525.2 | Broad Institute                                                              |
| 1707 | <i>Rhodotorula toruloides</i>            | Microbotryo   | Basidio | 6  | 1 | 3 | 14 | 24 | GCA_001255795.1 | UCB                                                                          |
| 1708 | <i>Pseudomicrostroma glucosiphilum</i>   | Exobasidio    | Basidio | 8  | 2 | 4 | 10 | 24 | GCA_003144135.1 | DOE Joint Genome Institute                                                   |
| 1709 | <i>Microbotryum violaceum</i>            | Microbotryo   | Basidio | 5  | 3 | 1 | 15 | 24 | GCA_900015485.1 | INRA-LIPM                                                                    |
| 1710 | <i>Tricholoma flavovirens</i>            | Agarico       | Basidio | 5  | 0 | 2 | 17 | 24 | GCA_003313805.1 | Kunming University of Science and Technology                                 |
| 1711 | <i>Oehlia diaphana</i>                   | Glomero       | Mucoro  | 3  | 1 | 0 | 20 | 24 | GCA_003833135.1 | University of Ottawa                                                         |
| 1712 | <i>Mortierella elongata</i>              | Mortierello   | Mucoro  | 4  | 4 | 1 | 14 | 23 | GCA_001651415.1 | DOE Joint Genome Institute                                                   |
| 1713 | <i>Tilletiopsis washingtonensis</i>      | Exobasidio    | Basidio | 4  | 5 | 2 | 12 | 23 | GCA_003144115.1 | DOE Joint Genome Institute                                                   |
| 1714 | <i>Microsporium canis</i>                | Eurotio       | Asco    | 6  | 2 | 1 | 14 | 23 | GCA_000151145.1 | Broad Institute                                                              |
| 1715 | <i>Xeromyces bisporus</i>                | Eurotio       | Asco    | 7  | 5 | 3 | 8  | 23 | GCA_900006255.1 | UPPSALA UNIVERSITET                                                          |
| 1716 | <i>Rhodotorula sp. ZM1</i>               | Microbotryo   | Basidio | 6  | 0 | 3 | 14 | 23 | GCA_009806315.1 | Zhejiang Normal University                                                   |

|      |                                     |               |           |    |   |   |    |    |                 |                                                                              |
|------|-------------------------------------|---------------|-----------|----|---|---|----|----|-----------------|------------------------------------------------------------------------------|
| 1717 | <i>Tricholoma bakamatsutake</i>     | Agarico       | Basidio   | 9  | 0 | 1 | 13 | 23 | GCA_003313665.1 | Kunming University of Science and Technology                                 |
| 1718 | <i>Holtermanniella nyarrowii</i>    | Tremello      | Basidio   | 7  | 7 | 2 | 7  | 23 | GCA_001600035.1 | RIKEN Center for Life Science Technologies, Division of Genomic Technologies |
| 1719 | <i>Hygrophorus russula</i>          | Agarico       | Basidio   | 2  | 1 | 2 | 18 | 23 | GCA_003314125.1 | Kunming University of Science and Technology                                 |
| 1720 | <i>Rhizophagus sp. MUCL 43196</i>   | Glomero       | Mucoro    | 3  | 1 | 0 | 19 | 23 | GCA_003549995.1 | INRA                                                                         |
| 1721 | <i>Phellinus lamaoensis</i>         | Agarico       | Basidio   | 6  | 2 | 1 | 14 | 23 | GCA_002794735.1 | Academia Sinica                                                              |
| 1722 | <i>Mortierella verticillata</i>     | Mortierello   | Mucoro    | 4  | 2 | 0 | 16 | 22 | GCA_000739165.1 | Broad Institute                                                              |
| 1723 | <i>Mortierella alpina</i>           | Mortierello   | Mucoro    | 4  | 2 | 2 | 14 | 22 | GCA_000507065.1 | IGS                                                                          |
| 1724 | <i>Tilletia walkeri</i>             | Exobasidio    | Basidio   | 6  | 3 | 1 | 12 | 22 | GCA_009428295.1 | Agriculture and Agri-Food Canada                                             |
| 1725 | <i>Cunninghamella bertholletiae</i> | Mucoro        | Mucoro    | 6  | 2 | 0 | 14 | 22 | GCA_000697215.1 | IGS                                                                          |
| 1726 | <i>Nannizzia gypsea</i>             | Eurotio       | Asco      | 7  | 0 | 0 | 15 | 22 | GCA_000150975.2 | Broad Institute                                                              |
| 1727 | <i>Cokeromyces recurvatus</i>       | Mucoro        | Mucoro    | 4  | 0 | 0 | 18 | 22 | GCA_000697235.1 | IGS                                                                          |
| 1728 | <i>Emmonsia sp. CAC-2015a</i>       | Eurotio       | Asco      | 8  | 2 | 2 | 10 | 22 | GCA_001660665.1 | Broad Institute                                                              |
| 1729 | <i>Symmetrospora coprosmae</i>      | Cystobasidio  | Basidio   | 7  | 4 | 2 | 9  | 22 | GCA_008802785.1 | University College Dublin                                                    |
| 1730 | <i>Glaciozyma antarctica</i>        | Microbotryo   | Basidio   | 6  | 0 | 2 | 14 | 22 | GCA_002917775.1 | Malaysia Genome Institute                                                    |
| 1731 | <i>Cryptococcus neoformans</i>      | Tremello      | Basidio   | 5  | 4 | 2 | 11 | 22 | GCA_002216725.1 | Washington University in St. Louis                                           |
| 1732 | <i>Phaeotremella skinneri</i>       | Tremello      | Basidio   | 4  | 5 | 3 | 10 | 22 | GCA_001599695.1 | RIKEN Center for Life Science Technologies, Division of Genomic Technologies |
| 1733 | <i>Puccinia novopanici</i>          | Puccinio      | Basidio   | 10 | 0 | 0 | 12 | 22 | GCA_004348175.1 | Noble Research Institute                                                     |
| 1734 | <i>Takashimella tepidaria</i>       | Tremello      | Basidio   | 3  | 7 | 4 | 8  | 22 | GCA_003116915.1 | RIKEN Center for Life Science Technologies, Division of Genomic Technologies |
| 1735 | <i>fungus sp. Mo6-1</i>             | 0             | 0         | 6  | 2 | 5 | 8  | 21 | GCA_002939055.1 | University of Montana                                                        |
| 1736 | <i>Absidia glauca</i>               | Mucoro        | Mucoro    | 4  | 1 | 1 | 15 | 21 | GCA_900079185.1 | FRIEDRICH SCHILLER UNIVERSITY JENA                                           |
| 1737 | <i>Amauroascus mutatus</i>          | Eurotio       | Asco      | 6  | 2 | 1 | 12 | 21 | GCA_001430935.1 | UC Berkeley                                                                  |
| 1738 | <i>Hesseltinella vesiculosa</i>     | Mucoro        | Mucoro    | 4  | 0 | 0 | 17 | 21 | GCA_002104935.1 | DOE Joint Genome Institute                                                   |
| 1739 | <i>Conidiobolus coronatus</i>       | Entomophthoro | Zoopago   | 5  | 1 | 0 | 15 | 21 | GCA_001566745.1 | JGI-PSF                                                                      |
| 1740 | <i>Rhodotorula diobovata</i>        | Microbotryo   | Basidio   | 5  | 2 | 2 | 12 | 21 | GCA_006352295.1 | University of Manitoba                                                       |
| 1741 | <i>Tilletiaria anomala</i>          | Exobasidio    | Basidio   | 6  | 3 | 0 | 12 | 21 | GCA_000711695.1 | DOE Joint Genome Institute                                                   |
| 1742 | <i>Puccinia coronata</i>            | Puccinio      | Basidio   | 6  | 0 | 0 | 15 | 21 | GCA_002873275.1 | University of Minnesota                                                      |
| 1743 | <i>Cryptococcus gattii VGII</i>     | Tremello      | Basidio   | 4  | 3 | 1 | 13 | 21 | GCA_003011995.1 | Jawaharlal Nehru Centre for Advanced Scientific Research                     |
| 1744 | <i>Puccinia graminis</i>            | Puccinio      | Basidio   | 9  | 0 | 0 | 12 | 21 | GCA_008522505.1 | University of Minnesota                                                      |
| 1745 | <i>Synchytrium endobioticum</i>     | Chytridio     | Chytridio | 6  | 2 | 0 | 13 | 21 | GCA_006536045.1 | Agriculture and Agri-Food Canada                                             |
| 1746 | <i>Amanita muscaria</i>             | Agarico       | Basidio   | 4  | 1 | 0 | 16 | 21 | GCA_000827485.1 | DOE Joint Genome Institute                                                   |
| 1747 | <i>Cunninghamella elegans</i>       | Mucoro        | Mucoro    | 6  | 2 | 0 | 12 | 20 | GCA_000697015.1 | IGS                                                                          |

|      |                                      |             |         |   |    |   |    |    |                 |                                                                         |
|------|--------------------------------------|-------------|---------|---|----|---|----|----|-----------------|-------------------------------------------------------------------------|
| 1748 | <i>Arthroderma uncinatum</i>         | Eurotio     | Asco    | 6 | 0  | 1 | 13 | 20 | GCA_011692745.1 | Chinese Academy of Medical Science and Peking Union Medical College     |
| 1749 | <i>Mrakia blollopis</i>              | Tremello    | Basidio | 4 | 2  | 4 | 10 | 20 | GCA_000950635.1 | National Institute of Advanced Industrial Science and Technology (AIST) |
| 1750 | <i>Piedraia hortae</i>               | Dothideo    | Asco    | 2 | 2  | 4 | 12 | 20 | GCA_010093745.1 | DOE Joint Genome Institute                                              |
| 1751 | <i>Mrakia psychrophila</i>           | Tremello    | Basidio | 4 | 4  | 4 | 8  | 20 | GCA_001889225.1 | Institute Of Microbiology Chinese Academy of Sciences                   |
| 1752 | <i>Protomyces lactucaedebilis</i>    | Taphrino    | Asco    | 4 | 6  | 2 | 8  | 20 | GCA_002105105.1 | DOE Joint Genome Institute                                              |
| 1753 | <i>Paracoccidioides lutzii</i>       | Eurotio     | Asco    | 7 | 1  | 2 | 10 | 20 | GCA_000150705.2 | Broad Institute                                                         |
| 1754 | <i>Protomyces macrosporus</i>        | Taphrino    | Asco    | 4 | 6  | 2 | 8  | 20 | GCA_003717175.1 | University of Helsinki                                                  |
| 1755 | <i>Zoophagus insidians</i>           | Zoopago     | Zoopago | 0 | 10 | 0 | 10 | 20 | GCA_004114325.1 | University of Michigan                                                  |
| 1756 | <i>Trichophyton mentagrophytes</i>   | Eurotio     | Asco    | 5 | 2  | 0 | 12 | 19 | GCA_003664465.1 | North-Western State Medical University named after I.I. Mechnikov       |
| 1757 | <i>Trichophyton benhamiae</i>        | Eurotio     | Asco    | 5 | 2  | 0 | 12 | 19 | GCA_001858085.1 | Swiss Institute of Bioinformatics                                       |
| 1758 | <i>Trichophyton equinum</i>          | Eurotio     | Asco    | 5 | 0  | 0 | 14 | 19 | GCA_000151175.1 | Broad Institute                                                         |
| 1759 | <i>Trichophyton tonsurans</i>        | Eurotio     | Asco    | 5 | 0  | 0 | 14 | 19 | GCA_000151455.1 | Broad Institute                                                         |
| 1760 | <i>Protomyces inouyei</i>            | Taphrino    | Asco    | 4 | 4  | 3 | 8  | 19 | GCA_003717155.1 | University of Helsinki                                                  |
| 1761 | <i>Saitoella complicata</i>          | 0           | Asco    | 6 | 2  | 1 | 10 | 19 | GCA_000227095.3 | Saitoella complicata genome sequencing consortium                       |
| 1762 | <i>Malassezia furfur</i>             | Malassezio  | Basidio | 6 | 1  | 0 | 12 | 19 | GCA_002551515.1 | University of Utrecht                                                   |
| 1763 | <i>Onygena corvina</i>               | Eurotio     | Asco    | 6 | 0  | 0 | 12 | 18 | GCA_000812245.1 | Aalborg University                                                      |
| 1764 | <i>Coccidioides immitis</i>          | Eurotio     | Asco    | 6 | 1  | 1 | 10 | 18 | GCA_004115165.2 | TGen North                                                              |
| 1765 | <i>Paracoccidioides brasiliensis</i> | Eurotio     | Asco    | 6 | 1  | 2 | 9  | 18 | GCA_000150475.2 | Broad Institute                                                         |
| 1766 | <i>Cryptococcus gattii VGIV</i>      | Tremello    | Basidio | 4 | 1  | 1 | 12 | 18 | GCA_000835755.1 | Broad Institute                                                         |
| 1767 | <i>Pisolithus tinctorius</i>         | Agarico     | Basidio | 3 | 0  | 1 | 14 | 18 | GCA_000827335.1 | DOE Joint Genome Institute                                              |
| 1768 | <i>Amanita brunnescens</i>           | Agarico     | Basidio | 4 | 4  | 1 | 9  | 18 | GCA_001691785.2 | Harvard University                                                      |
| 1769 | <i>Trichophyton verrucosum</i>       | Eurotio     | Asco    | 5 | 0  | 0 | 12 | 17 | GCA_000151505.1 | Arthroderma Genome Sequencing Consortium                                |
| 1770 | <i>Trichophyton rubrum</i>           | Eurotio     | Asco    | 5 | 0  | 0 | 12 | 17 | GCA_000616845.1 | Broad Institute                                                         |
| 1771 | <i>Trichophyton soudanense</i>       | Eurotio     | Asco    | 5 | 0  | 0 | 12 | 17 | GCA_000616865.1 | Broad Institute                                                         |
| 1772 | <i>Trichophyton interdigitale</i>    | Eurotio     | Asco    | 5 | 0  | 0 | 12 | 17 | GCA_000622975.1 | Broad Institute                                                         |
| 1773 | <i>Trichophyton kuryangei</i>        | Eurotio     | Asco    | 5 | 0  | 0 | 12 | 17 | GCA_012184535.1 | Belgian Coordinated Collection of Microorganisms, BCCM                  |
| 1774 | <i>Trichophyton violaceum</i>        | Eurotio     | Asco    | 5 | 0  | 0 | 12 | 17 | GCA_001651435.1 | Chinese Academy of Medical Science & Peking Union Medical College       |
| 1775 | <i>Trichophyton yaoundei</i>         | Eurotio     | Asco    | 5 | 0  | 0 | 12 | 17 | GCA_012184575.1 | Belgian Coordinated Collection of Microorganisms, BCCM                  |
| 1776 | <i>Bysoonygena ceratinophila</i>     | Eurotio     | Asco    | 6 | 1  | 0 | 10 | 17 | GCA_001430925.1 | UC Berkeley                                                             |
| 1777 | <i>Rhodotorula mucilaginosa</i>      | Microbotryo | Basidio | 4 | 3  | 0 | 10 | 17 | GCA_003055205.1 | Indian Institute Of Chemical biology                                    |

|      |                                      |             |           |   |   |   |    |    |                 |                                                  |
|------|--------------------------------------|-------------|-----------|---|---|---|----|----|-----------------|--------------------------------------------------|
| 1778 | <i>Rhodotorula sp. JG-1b</i>         | Microbotryo | Basidio   | 3 | 3 | 1 | 10 | 17 | GCA_001541205.1 | DOE Joint Genome Institute                       |
| 1779 | <i>Thelephora aurantiotincta</i>     | Agarico     | Basidio   | 4 | 0 | 3 | 10 | 17 | GCA_003316405.1 | Kunming University of Science and Technology     |
| 1780 | <i>Cryptococcus cf. gattii</i>       | Tremello    | Basidio   | 4 | 2 | 1 | 10 | 17 | GCA_009650685.1 | Broad Institute                                  |
| 1781 | <i>Cryptococcus gattii VGIII</i>     | Tremello    | Basidio   | 4 | 2 | 1 | 10 | 17 | GCA_000836335.1 | Broad Institute                                  |
| 1782 | <i>Pisolithus microcarpus</i>        | Agarico     | Basidio   | 2 | 2 | 1 | 12 | 17 | GCA_000827275.1 | JGI                                              |
| 1783 | <i>Sarcodon sp. MG97</i>             | Agarico     | Basidio   | 5 | 2 | 1 | 9  | 17 | GCA_003313065.1 | Kunming University of Science and Technology     |
| 1784 | <i>Xylona heveae</i>                 | Xylono      | Asco      | 6 | 0 | 0 | 10 | 16 | GCA_001619985.1 | DOE Joint Genome Institute                       |
| 1785 | <i>Uncinocarpus reesii</i>           | Eurotio     | Asco      | 6 | 1 | 1 | 8  | 16 | GCA_000003515.2 | Broad Institute                                  |
| 1786 | <i>Taphrina betulina</i>             | Taphrino    | Asco      | 4 | 2 | 2 | 8  | 16 | GCA_008802775.1 | University College Dublin                        |
| 1787 | <i>Protomyces sp. C29</i>            | Taphrino    | Asco      | 4 | 4 | 0 | 8  | 16 | GCA_003568695.1 | University of Helsinki                           |
| 1788 | <i>Protomyces gravidus</i>           | Taphrino    | Asco      | 4 | 4 | 0 | 8  | 16 | GCA_003717255.1 | University of Helsinki                           |
| 1789 | <i>Cryptococcus gattii VGI</i>       | Tremello    | Basidio   | 3 | 1 | 1 | 11 | 16 | GCA_000836355.1 | Broad Institute                                  |
| 1790 | <i>Wallemia hederiae</i>             | Wallemio    | Basidio   | 7 | 2 | 0 | 7  | 16 | GCA_004918325.1 | Biotechnical Faculty, University of Ljubljana    |
| 1791 | <i>Malassezia globosa</i>            | Malassezio  | Basidio   | 4 | 0 | 0 | 12 | 16 | GCA_001264805.1 | Genome Institute of Singapore                    |
| 1792 | <i>Caulochytrium protostelioides</i> | Chytridio   | Chytridio | 2 | 2 | 3 | 8  | 15 | GCA_003615045.1 | DOE Joint Genome Institute                       |
| 1793 | <i>Podosphaera leucotricha</i>       | Leotio      | Asco      | 2 | 2 | 2 | 9  | 15 | GCA_013170925.1 | Washington State University                      |
| 1794 | <i>Rhodotorula taiwanensis</i>       | Microbotryo | Basidio   | 3 | 1 | 1 | 10 | 15 | GCA_002922495.1 | Lawrence Livermore National Laboratory           |
| 1795 | <i>Taphrina sp. SM11</i>             | Taphrino    | Asco      | 4 | 2 | 2 | 7  | 15 | GCA_004000165.1 | University of Helsinki                           |
| 1796 | <i>Erysiphe pulchra</i>              | Leotio      | Asco      | 2 | 6 | 2 | 5  | 15 | GCA_002918395.1 | USDA-ARS                                         |
| 1797 | <i>Kwoniella mangrovensis</i>        | Tremello    | Basidio   | 2 | 3 | 2 | 8  | 15 | GCA_000507485.3 | Broad Institute                                  |
| 1798 | <i>Lobosporangium transversale</i>   | Mortierello | Mucoro    | 2 | 2 | 0 | 10 | 14 | GCA_002105155.1 | DOE Joint Genome Institute                       |
| 1799 | <i>Spizellomyces sp. 'palustris'</i> | Chytridio   | Chytridio | 5 | 0 | 0 | 9  | 14 | GCA_006535965.1 | Agriculture and Agri-Food Canada                 |
| 1800 | <i>Protomyces pachydermus</i>        | Taphrino    | Asco      | 4 | 4 | 0 | 6  | 14 | GCA_003717275.1 | University of Helsinki                           |
| 1801 | <i>Taphrina pruni</i>                | Taphrino    | Asco      | 2 | 5 | 1 | 6  | 14 | GCA_005281585.1 | Northwest A&F University                         |
| 1802 | <i>Taphrina flavorubra</i>           | Taphrino    | Asco      | 2 | 5 | 1 | 6  | 14 | GCA_000836175.1 | University of Miyazaki                           |
| 1803 | <i>Golovinomyces cichoracearum</i>   | Leotio      | Asco      | 2 | 3 | 2 | 7  | 14 | GCA_003611215.1 | University of Maryland                           |
| 1804 | <i>Golubevia sp. BC0812</i>          | Exobasidio  | Basidio   | 3 | 2 | 0 | 9  | 14 | GCA_012976215.1 | Wageningen UR                                    |
| 1805 | <i>Amanita phalloides</i>            | Agarico     | Basidio   | 4 | 0 | 0 | 10 | 14 | GCA_001983385.1 | Michigan State University                        |
| 1806 | <i>Malassezia caprae</i>             | Malassezio  | Basidio   | 4 | 0 | 0 | 10 | 14 | GCA_001264625.1 | Genome Institute of Singapore                    |
| 1807 | <i>Rhodotorula sp. CCFEE 5036</i>    | Microbotryo | Basidio   | 4 | 1 | 0 | 8  | 13 | GCA_005059875.1 | University of California, Riverside              |
| 1808 | <i>Taphrina confusa</i>              | Taphrino    | Asco      | 2 | 4 | 1 | 6  | 13 | GCA_005281535.1 | Northwest A&F University                         |
| 1809 | <i>Blumeria graminis</i>             | Leotio      | Asco      | 1 | 3 | 1 | 8  | 13 | GCA_900237765.1 | MAX PLANCK INSTITUTE FOR PLANT BREEDING RESEARCH |
| 1810 | <i>Ophidiomyces ophioidicola</i>     | Eurotio     | Asco      | 5 | 0 | 0 | 8  | 13 | GCA_002167195.1 | University of Arizona                            |
| 1811 | <i>Taphrina communis</i>             | Taphrino    | Asco      | 2 | 4 | 1 | 6  | 13 | GCA_005281525.1 | Northwest A&F University                         |
| 1812 | <i>Taphrina deformans</i>            | Taphrino    | Asco      | 4 | 2 | 1 | 6  | 13 | GCA_005281805.1 | Northwest A&F University                         |
| 1813 | <i>Golubevia sp. BC0902</i>          | Exobasidio  | Basidio   | 3 | 2 | 0 | 8  | 13 | GCA_012976205.1 | Wageningen UR                                    |
| 1814 | <i>Sporidiobolus pararoseus</i>      | Microbotryo | Basidio   | 4 | 0 | 1 | 8  | 13 | GCA_010758995.1 | Shenyang Agricultural University                 |

|      |                                    |               |           |   |   |   |    |    |                 |                                                                              |
|------|------------------------------------|---------------|-----------|---|---|---|----|----|-----------------|------------------------------------------------------------------------------|
| 1815 | <i>Malassezia obtusa</i>           | Malassezio    | Basidio   | 3 | 1 | 0 | 9  | 13 | GCA_001264985.1 | Genome Institute of Singapore                                                |
| 1816 | <i>Mortierella sp. BCC40632</i>    | Mortierello   | Mucoro    | 2 | 0 | 0 | 10 | 12 | GCA_011634665.1 | National Center for Genetic Engineering and Biotechnology                    |
| 1817 | <i>Taphrina wiesneri</i>           | Taphrino      | Asco      | 3 | 3 | 0 | 6  | 12 | GCA_005281515.1 | Northwest A&F University                                                     |
| 1818 | <i>Spizellomyces punctatus</i>     | Chytridio     | Chytridio | 4 | 0 | 0 | 8  | 12 | GCA_000182565.2 | Broad Institute                                                              |
| 1819 | <i>Mixia osmundae</i>              | Mixio         | Basidio   | 2 | 0 | 0 | 10 | 12 | GCA_000708205.1 | DOE Joint Genome Institute                                                   |
| 1820 | <i>Zoopage sp. CT-All</i>          | Zoopago       | Zoopago   | 0 | 0 | 4 | 8  | 12 | GCA_004114245.1 | University of Michigan                                                       |
| 1821 | <i>Malassezia japonica</i>         | Malassezio    | Basidio   | 3 | 0 | 0 | 9  | 12 | GCA_001600795.1 | RIKEN Center for Life Science Technologies, Division of Genomic Technologies |
| 1822 | <i>Golubevia sp. BC0850</i>        | Exobasidio    | Basidio   | 2 | 2 | 0 | 8  | 12 | GCA_012976225.1 | Wageningen UR                                                                |
| 1823 | <i>Amanita bisporigera</i>         | Agarico       | Basidio   | 4 | 0 | 0 | 8  | 12 | GCA_001983365.1 | Michigan State University                                                    |
| 1824 | <i>Malassezia equina</i>           | Malassezio    | Basidio   | 2 | 0 | 0 | 10 | 12 | GCA_001264685.1 | Genome Institute of Singapore                                                |
| 1825 | <i>Neolecta irregularis</i>        | Neolecto      | Asco      | 3 | 2 | 2 | 5  | 12 | GCA_001929475.1 | University of California, Riverside                                          |
| 1826 | <i>Malassezia nana</i>             | Malassezio    | Basidio   | 3 | 0 | 0 | 9  | 12 | GCA_001600835.1 | RIKEN Center for Life Science Technologies, Division of Genomic Technologies |
| 1827 | <i>Malassezia dermatis</i>         | Malassezio    | Basidio   | 2 | 0 | 0 | 10 | 12 | GCA_001600775.1 | RIKEN Center for Life Science Technologies, Division of Genomic Technologies |
| 1828 | <i>Puccinia striiformis</i>        | Puccinio      | Basidio   | 8 | 1 | 1 | 2  | 12 | GCA_011750755.1 | Australian National University                                               |
| 1829 | <i>Golubevia pallescens</i>        | Exobasidio    | Basidio   | 3 | 3 | 0 | 6  | 12 | GCA_001599655.1 | RIKEN Center for Life Science Technologies, Division of Genomic Technologies |
| 1830 | <i>Smittium angustum</i>           | Harpello      | Zoopago   | 0 | 0 | 0 | 11 | 11 | GCA_003097675.1 | University of Toronto                                                        |
| 1831 | <i>Furculomyces boomerangus</i>    | Harpello      | Zoopago   | 0 | 0 | 0 | 11 | 11 | GCA_003086725.1 | University of Toronto                                                        |
| 1832 | <i>Taphrina populina</i>           | Taphrino      | Asco      | 3 | 3 | 0 | 5  | 11 | GCA_000836195.1 | University of Miyazaki                                                       |
| 1833 | <i>fungus sp. ARF18</i>            | 0             | 0         | 4 | 0 | 0 | 7  | 11 | GCA_002224055.1 | University of Arkansas                                                       |
| 1834 | <i>Puccinia triticina</i>          | Puccinio      | Basidio   | 6 | 0 | 0 | 5  | 11 | GCA_013090125.1 | University of Sydney                                                         |
| 1835 | <i>Malassezia cuniculi</i>         | Malassezio    | Basidio   | 3 | 0 | 0 | 8  | 11 | GCA_001264635.1 | Genome Institute of Singapore                                                |
| 1836 | <i>Malassezia slooffiae</i>        | Malassezio    | Basidio   | 3 | 0 | 0 | 8  | 11 | GCA_010577765.1 | Jawaharlal Nehru Centre for Advanced Scientific Research                     |
| 1837 | <i>Amanita pseudoporphyria</i>     | Agarico       | Basidio   | 4 | 0 | 0 | 7  | 11 | GCA_003316615.1 | Kunming University of Science and Technology                                 |
| 1838 | <i>Smittium mucronatum</i>         | Harpello      | Zoopago   | 0 | 2 | 1 | 7  | 10 | GCA_001953115.1 | University of Toronto                                                        |
| 1839 | <i>Puccinia sorghi</i>             | Puccinio      | Basidio   | 4 | 0 | 0 | 6  | 10 | GCA_001263375.1 | BIA - FCEN - UBA                                                             |
| 1840 | <i>Piptocephalis cylindrospora</i> | Zoopago       | Zoopago   | 1 | 0 | 0 | 9  | 10 | GCA_003614145.1 | DOE Joint Genome Institute                                                   |
| 1841 | <i>Malassezia sympodialis</i>      | Malassezio    | Basidio   | 2 | 0 | 0 | 8  | 10 | GCA_001264715.1 | Genome Institute of Singapore                                                |
| 1842 | <i>Malassezia pachydermatis</i>    | Malassezio    | Basidio   | 3 | 0 | 0 | 7  | 10 | GCA_001264975.1 | Genome Institute of Singapore                                                |
| 1843 | <i>Amanita polypyramis</i>         | Agarico       | Basidio   | 2 | 0 | 0 | 8  | 10 | GCA_001691755.2 | Harvard University                                                           |
| 1844 | <i>Kwonilella pini</i>             | Tremello      | Basidio   | 2 | 2 | 2 | 4  | 10 | GCA_000512605.2 | Broad Institute                                                              |
| 1845 | <i>Massospora cicadina</i>         | Entomophthoro | Zoopago   | 2 | 0 | 0 | 7  | 9  | GCA_006912075.1 | University of Michigan                                                       |



|      |                                          |               |              |   |   |   |   |   |                 |                                                                                    |
|------|------------------------------------------|---------------|--------------|---|---|---|---|---|-----------------|------------------------------------------------------------------------------------|
| 1846 | <i>Massospora platyediae</i>             | Entomophthoro | Zoopago      | 4 | 0 | 0 | 5 | 9 | GCA_006912095.1 | University of California,<br>Riverside                                             |
| 1847 | <i>Thamnocephalis sphaerospora</i>       |               | Zoopago      | 0 | 0 | 2 | 7 | 9 | GCA_003614735.1 | DOE Joint Genome Institute                                                         |
| 1848 | <i>Oidium heveae</i>                     | Leotio        | Asco         | 1 | 2 | 0 | 6 | 9 | GCA_003957845.1 | Hainan University                                                                  |
| 1849 | <i>Amanita inopinata</i>                 | Agarico       | Basidio      | 2 | 0 | 0 | 7 | 9 | GCA_001691775.3 | Harvard University                                                                 |
| 1850 | <i>Acaulopage tetraceros</i>             | Zoopago       | Zoopago      | 1 | 0 | 0 | 8 | 9 | GCA_004114255.1 | University of Michigan                                                             |
| 1851 | <i>Wallemia ichthyophaga</i>             | Wallemio      | Basidio      | 4 | 1 | 0 | 4 | 9 | GCA_004918895.1 | Biotechnical Faculty, University<br>of Ljubljana                                   |
| 1852 | <i>Amanita jacksonii</i>                 | Agarico       | Basidio      | 1 | 0 | 0 | 8 | 9 | GCA_000497225.1 | University of Toronto                                                              |
| 1853 | <i>Malassezia vespertilionis</i>         | Malassezio    | Basidio      | 2 | 0 | 0 | 7 | 9 | GCA_002818225.1 | US Forest Service                                                                  |
| 1854 | <i>Homolaphlyctis polyrhiza</i>          | Chytridio     | Chytridio    | 0 | 0 | 0 | 8 | 8 | GCA_000235945.1 | University of Idaho, Initiative<br>for Bioinformatics and<br>Evolutionary Studies  |
| 1855 | <i>Capniomyces stellatus</i>             | Harpello      | Zoopago      | 0 | 0 | 0 | 8 | 8 | GCA_001661515.1 | University of Toronto                                                              |
| 1856 | <i>Smittium simulii</i>                  | Harpello      | Zoopago      | 0 | 0 | 0 | 8 | 8 | GCA_003086735.1 | University of Toronto                                                              |
| 1857 | <i>Oidium neolycopersici</i>             | Leotio        | Asco         | 2 | 1 | 0 | 5 | 8 | GCA_003610855.1 | University of Maryland                                                             |
| 1858 | <i>Cystobasidium pallidum</i>            | Cystobasidio  | Basidio      | 2 | 0 | 2 | 4 | 8 | GCA_001599955.1 | RIKEN Center for Life Science<br>Technologies, Division of<br>Genomic Technologies |
| 1859 | <i>uncultured Malassezia</i>             | Malassezio    | Basidio      | 2 | 0 | 0 | 6 | 8 | GCA_903798065.1 | EBI                                                                                |
| 1860 | <i>Malassezia restricta</i>              | Malassezio    | Basidio      | 2 | 0 | 0 | 6 | 8 | GCA_001264725.1 | Genome Institute of Singapore                                                      |
| 1861 | <i>Puccinia hordei</i>                   | Puccinio      | Basidio      | 4 | 0 | 0 | 4 | 8 | GCA_007896445.1 | University of Sydney                                                               |
| 1862 | <i>Malassezia yamatoensis</i>            | Malassezio    | Basidio      | 2 | 0 | 0 | 6 | 8 | GCA_001264885.1 | Genome Institute of Singapore                                                      |
| 1863 | <i>Catenaria anguillulae</i>             | Blastocladio  | Blastocladio | 0 | 1 | 2 | 4 | 7 | GCA_002102555.1 | DOE Joint Genome Institute                                                         |
| 1864 | <i>Zancudomyces culisetae</i>            | Harpello      | Zoopago      | 2 | 1 | 0 | 4 | 7 | GCA_001969505.1 | University of Toronto                                                              |
| 1865 | <i>Batrachochytrium dendrobatidis</i>    | Chytridio     | Chytridio    | 1 | 0 | 0 | 6 | 7 | GCA_003595275.1 | University of Otago                                                                |
| 1866 | <i>Smittium megazygosporum</i>           | Harpello      | Zoopago      | 0 | 0 | 0 | 7 | 7 | GCA_003086715.1 | University of Toronto                                                              |
| 1867 | <i>Syncephalis pseudoplumigaleata</i>    | Zoopago       | Zoopago      | 2 | 1 | 0 | 4 | 7 | GCA_003614755.1 | DOE Joint Genome Institute                                                         |
| 1868 | <i>Cryptococcus depauperatus</i>         | Tremello      | Basidio      | 2 | 0 | 1 | 4 | 7 | GCA_001720245.1 | Broad Institute                                                                    |
| 1869 | <i>Puccinia horiana</i>                  | Puccinio      | Basidio      | 3 | 0 | 0 | 4 | 7 | GCA_001624995.1 | National Academy of<br>Agricultural Science                                        |
| 1870 | <i>Phaeotremella fagi</i>                | Tremello      | Basidio      | 0 | 0 | 3 | 4 | 7 | GCA_001599715.1 | RIKEN Center for Life Science<br>Technologies, Division of<br>Genomic Technologies |
| 1871 | <i>Dimargaris cristalligena</i>          | Dimargarito   | Zoopago      | 1 | 1 | 0 | 4 | 6 | GCA_003614675.1 | DOE Joint Genome Institute                                                         |
| 1872 | <i>Erysiphe pisi</i>                     | Leotio        | Asco         | 1 | 1 | 0 | 4 | 6 | GCA_000208805.1 | Max-Planck-Institute for Plant<br>Breeding Research                                |
| 1873 | <i>Malassezia sp.</i>                    | Malassezio    | Basidio      | 2 | 0 | 0 | 4 | 6 | GCA_004026415.1 | Jill Banfield's Lab at Berkeley                                                    |
| 1874 | <i>Batrachochytrium salamandrivorans</i> | Chytridio     | Chytridio    | 0 | 0 | 0 | 5 | 5 | GCA_002006685.1 | Broad Institute                                                                    |
| 1875 | <i>Erysiphe necator</i>                  | Leotio        | Asco         | 1 | 0 | 0 | 4 | 5 | GCA_000798715.1 | University of California, Davis                                                    |
| 1876 | <i>Phaffia rhodozyma</i>                 | Tremello      | Basidio      | 0 | 1 | 0 | 4 | 5 | GCA_001600435.1 | RIKEN Center for Life Science<br>Technologies, Division of<br>Genomic Technologies |

|      |                                       |                |               |   |   |   |   |   |                 |                                                                                       |
|------|---------------------------------------|----------------|---------------|---|---|---|---|---|-----------------|---------------------------------------------------------------------------------------|
| 1877 | <i>Cronartium ribicola</i>            | Puccinio       | Basidio       | 3 | 0 | 0 | 2 | 5 | GCA_000500245.1 | Tree Aggressors Identification using Genomic Approaches                               |
| 1878 | <i>Cochlonema odontosperma</i>        | Zoopago        | Zoopago       | 0 | 0 | 0 | 4 | 4 | GCA_004114315.1 | University of Michigan                                                                |
| 1879 | <i>Stylopaga hadra</i>                | Zoopago        | Zoopago       | 0 | 1 | 0 | 3 | 4 | GCA_005111325.1 | University of Michigan                                                                |
| 1880 | <i>Rozella allomyces</i>              | 0              | Crypto        | 0 | 0 | 0 | 4 | 4 | GCA_000442015.1 | University of Michigan                                                                |
| 1881 | <i>Wallemia mellicola</i>             | Wallemio       | Basidio       | 2 | 0 | 0 | 2 | 4 | GCA_004919005.1 | Biotechnical Faculty, University of Ljubljana                                         |
| 1882 | <i>Tremella mesenterica</i>           | Tremello       | Basidio       | 0 | 0 | 0 | 4 | 4 | GCA_004117975.1 | Broad Institute                                                                       |
| 1883 | <i>Melampsora medusae</i>             | Puccinio       | Basidio       | 2 | 1 | 0 | 0 | 3 | GCA_002157035.1 | BC Cancer Agency, Canada's Michael Smith Genome Sciences Centre                       |
| 1884 | <i>Melampsora abietis-canadensis</i>  | Puccinio       | Basidio       | 3 | 0 | 0 | 0 | 3 | GCA_002157025.1 | BC Cancer Agency, Canada's Michael Smith Genome Sciences Centre                       |
| 1885 | <i>Schizosaccharomyces japonicus</i>  | Schizosaccharo | Asco          | 0 | 0 | 0 | 2 | 2 | GCA_000149845.2 | Broad Institute                                                                       |
| 1886 | <i>Schizosaccharomyces cryophilus</i> | Schizosaccharo | Asco          | 0 | 0 | 0 | 2 | 2 | GCA_000004155.2 | Broad Institute                                                                       |
| 1887 | <i>Schizosaccharomyces octosporus</i> | Schizosaccharo | Asco          | 0 | 0 | 0 | 2 | 2 | GCA_000150505.2 | Broad Institute                                                                       |
| 1888 | <i>Schizosaccharomyces pombe</i>      | Schizosaccharo | Asco          | 0 | 0 | 0 | 2 | 2 | GCA_003086255.1 | Uppsala University                                                                    |
| 1889 | <i>Herpomyces periplanetae</i>        | Laboulbenio    | Asco          | 2 | 0 | 0 | 0 | 2 | GCA_009733715.1 | University of Warsaw                                                                  |
| 1890 | <i>Nosema bombycis</i>                | 0              | Microsporidia | 1 | 0 | 1 | 0 | 2 | GCA_000383075.1 | The Institute of Sericulture and Systems Biology (ISSB) of Southwest University (SWU) |
| 1891 | <i>Melampsora occidentalis</i>        | Puccinio       | Basidio       | 2 | 0 | 0 | 0 | 2 | GCA_002157085.1 | BC Cancer Agency, Canada's Michael Smith Genome Sciences Centre                       |
| 1892 | <i>Endocronartium harknessii</i>      | Puccinio       | Basidio       | 0 | 2 | 0 | 0 | 2 | GCA_000500795.1 | Tree Aggressors Identification using Genomic Approaches                               |
| 1893 | <i>Uromyces viciae-fabae</i>          | Puccinio       | Basidio       | 2 | 0 | 0 | 0 | 2 | GCA_000785685.1 | Universitaet Hohenheim                                                                |
| 1894 | <i>Melampsora larici-populina</i>     | Puccinio       | Basidio       | 1 | 0 | 0 | 0 | 1 | GCA_000204055.1 | US DOE Joint Genome Institute (JGI-PGF)                                               |
| 1895 | <i>Cronartium comandrae</i>           | Puccinio       | Basidio       | 0 | 0 | 0 | 1 | 1 | GCA_000464975.1 | Tree Aggressors Identification using Genomic Approaches                               |
| 1896 | <i>Meira miltonrushii</i>             | Exobasidio     | Basidio       | 0 | 0 | 0 | 1 | 1 | GCA_003144205.1 | DOE Joint Genome Institute                                                            |
| 1897 | <i>Mitosporidium daphniae</i>         | 0              | Microsporidia | 0 | 0 | 0 | 1 | 1 | GCA_000760515.2 | Illinois Institute of Technology                                                      |
| 1898 | <i>Melampsora allii-populina</i>      | Puccinio       | Basidio       | 0 | 0 | 0 | 1 | 1 | GCA_002157005.1 | BC Cancer Agency, Canada's Michael Smith Genome Sciences Centre                       |
| 1899 | <i>Microbotryum lychnidis-dioicae</i> | Microbotryo    | Basidio       | 0 | 1 | 0 | 0 | 1 | GCA_001244265.1 | INRA-LIPM                                                                             |
| 1900 | <i>Pseudoloma neurophilia</i>         | 0              | Microsporidia | 1 | 0 | 0 | 0 | 1 | GCA_001432165.1 | University of Ottawa                                                                  |
| 1901 | <i>Melampsora aecidioides</i>         | Puccinio       | Basidio       | 0 | 0 | 0 | 1 | 1 | GCA_002157015.1 | BC Cancer Agency, Canada's Michael Smith Genome Sciences Centre                       |
| 1902 | <i>Paramicrosporidium saccamoebae</i> | 0              | Crypto        | 0 | 0 | 0 | 0 | 0 | GCA_002794465.1 | University of Michigan                                                                |
| 1903 | <i>Nosema ceranae</i>                 | 0              | Microsporidia | 0 | 0 | 0 | 0 | 0 | GCA_004919615.1 | Jiangxi Agricultural University                                                       |

|      |                                        |               |               |   |   |   |   |   |                 |                                                                                          |
|------|----------------------------------------|---------------|---------------|---|---|---|---|---|-----------------|------------------------------------------------------------------------------------------|
| 1904 | <i>Amphiambllys sp. WSBS2006</i>       | 0             | Microsporidia | 0 | 0 | 0 | 0 | 0 | GCA_001875675.1 | A.N. Belozersky Institute of Physico-Chemical Biology, Lomonosov Moscow State University |
| 1905 | <i>Vavraia culicis</i>                 | 0             | Microsporidia | 0 | 0 | 0 | 0 | 0 | GCA_000192795.1 | Broad Institute                                                                          |
| 1906 | <i>Tubulinosema ratisbonensis</i>      | 0             | Microsporidia | 0 | 0 | 0 | 0 | 0 | GCA_004000155.1 | Universite Clermont Auvergne, CNRS UMR 6023                                              |
| 1907 | <i>Edhazardia aedis</i>                | 0             | Microsporidia | 0 | 0 | 0 | 0 | 0 | GCA_000230595.3 | Broad Institute                                                                          |
| 1908 | <i>Nematocida displodere</i>           | 0             | Microsporidia | 0 | 0 | 0 | 0 | 0 | GCA_001642395.1 | University of California San Diego                                                       |
| 1909 | <i>Hamiltosporidium tvaerminnensis</i> | 0             | Microsporidia | 0 | 0 | 0 | 0 | 0 | GCA_004325075.1 | Illinois Institute of Technology                                                         |
| 1910 | <i>Trachipleistophora hominis</i>      | 0             | Microsporidia | 0 | 0 | 0 | 0 | 0 | GCA_000316135.1 | Institute for Cell and Molecular Biosciences, Newcastle University                       |
| 1911 | <i>Hamiltosporidium magnivora</i>      | 0             | Microsporidia | 0 | 0 | 0 | 0 | 0 | GCA_004325065.1 | Illinois Institute of Technology                                                         |
| 1912 | <i>Austropuccinia psidii</i>           | Puccinio      | Basidio       | 0 | 0 | 0 | 0 | 0 | GCA_902702905.1 | UNIVERSITY OF SYDNEY                                                                     |
| 1913 | <i>Encephalitozoon intestinalis</i>    | 0             | Microsporidia | 0 | 0 | 0 | 0 | 0 | GCA_000146465.1 | Keeling lab, University of British Columbia                                              |
| 1914 | <i>Nematocida parisii</i>              | 0             | Microsporidia | 0 | 0 | 0 | 0 | 0 | GCA_000190615.1 | Broad Institute                                                                          |
| 1915 | <i>Enterocytozoon bieneusi</i>         | 0             | Microsporidia | 0 | 0 | 0 | 0 | 0 | GCA_000209485.1 | Tufts Cummings School of Veterinary Medicine                                             |
| 1916 | <i>Vittaforma corneae</i>              | 0             | Microsporidia | 0 | 0 | 0 | 0 | 0 | GCA_000231115.1 | Broad Institute                                                                          |
| 1917 | <i>Encephalitozoon hellem</i>          | 0             | Microsporidia | 0 | 0 | 0 | 0 | 0 | GCA_000277815.3 | University of British Columbia                                                           |
| 1918 | <i>Encephalitozoon romaleae</i>        | 0             | Microsporidia | 0 | 0 | 0 | 0 | 0 | GCA_000280035.2 | University of Ottawa                                                                     |
| 1919 | <i>Nematocida sp. 1</i>                | 0             | Microsporidia | 0 | 0 | 0 | 0 | 0 | GCA_000738915.1 | Broad Institute                                                                          |
| 1920 | <i>Ordospora colligata</i>             | 0             | Microsporidia | 0 | 0 | 0 | 0 | 0 | GCA_000803265.1 | University of British Columbia                                                           |
| 1921 | <i>Encephalitozoon cuniculi</i>        | 0             | Microsporidia | 0 | 0 | 0 | 0 | 0 | GCA_001078035.1 | University of Ottawa                                                                     |
| 1922 | <i>Nematocida sp. ERTm5</i>            | 0             | Microsporidia | 0 | 0 | 0 | 0 | 0 | GCA_001642415.1 | University of California San Diego                                                       |
| 1923 | <i>Hemileia vastatrix</i>              | Puccinio      | Basidio       | 0 | 0 | 0 | 0 | 0 | GCA_004125335.1 | Universidade Federal de Lavras (UFLA)                                                    |
| 1924 | <i>Antonospora locustae</i>            | 0             | Microsporidia | 0 | 0 | 0 | 0 | 0 | GCA_007674295.1 | Zhengzhou Normal University                                                              |
| 1925 | <i>Cronartium quercuum</i>             | Puccinio      | Basidio       | 0 | 0 | 0 | 0 | 0 | GCA_000500775.1 | Tree Aggressors Identification using Genomic Approaches                                  |
| 1926 | <i>Pneumocystis jirovecii</i>          | Pneumocystido | Asco          | 0 | 0 | 0 | 0 | 0 | GCA_001477535.1 | Broad Institute                                                                          |
| 1927 | <i>Hepatospora eriocheir</i>           | 0             | Microsporidia | 0 | 0 | 0 | 0 | 0 | GCA_002087885.1 | University of Exeter                                                                     |
| 1928 | <i>Metchnikovella incurvata</i>        | 0             | Microsporidia | 0 | 0 | 0 | 0 | 0 | GCA_003600395.1 | SINGEK                                                                                   |
| 1929 | <i>Enterocytozoon hepatopenaei</i>     | 0             | Microsporidia | 0 | 0 | 0 | 0 | 0 | GCA_003709115.1 | Korea Research Institute of Bioscience & Biotechnology                                   |
| 1930 | <i>Pneumocystis carinii</i>            | Pneumocystido | Asco          | 0 | 0 | 0 | 0 | 0 | GCA_001477545.1 | Broad Institute                                                                          |
| 1931 | <i>Meira nashicola</i>                 | Exobasidio    | Basidio       | 0 | 0 | 0 | 0 | 0 | GCA_001600355.1 | RIKEN Center for Life Science Technologies, Division of Genomic Technologies             |
| 1932 | <i>Enterospora canceri</i>             | 0             | Microsporidia | 0 | 0 | 0 | 0 | 0 | GCA_002087915.1 | University of Exeter                                                                     |

Table S2. List of all 1.932 fungal species/strains analyzed based on genome sequence. The species are ranked with regard to the total number of unique “Function;Family” observations, reflecting the enzyme function specificity diversity of the fungal species analyzed, specifying the number of “Function;Family” observations for each type of biomass substrate as well. The data shown is the full list of data supporting Table 2 in the main manuscript.

| No | Species                               | Class    | Phylum | ACC       |        |       |        |       | Submitter       |                                                           |
|----|---------------------------------------|----------|--------|-----------|--------|-------|--------|-------|-----------------|-----------------------------------------------------------|
|    |                                       |          |        | Cellulose | Pectin | Xylan | Lignin | Total |                 |                                                           |
| 1  | <i>Colletotrichum tropicale</i>       | Sordario | Asco   | 16        | 53     | 25    | 18     | 112   | GCA_013201785.1 | RIKEN                                                     |
| 2  | <i>Colletotrichum aenigma</i>         | Sordario | Asco   | 16        | 53     | 25    | 18     | 112   | GCA_013390185.1 | RIKEN                                                     |
| 3  | <i>Colletotrichum sp. COLG25</i>      | Sordario | Asco   | 17        | 53     | 24    | 18     | 112   | GCA_009801095.1 | University of Agriculture,<br>Faisalabad Pakistan.        |
| 4  | <i>Colletotrichum asianum</i>         | Sordario | Asco   | 16        | 53     | 24    | 18     | 111   | GCA_009806415.1 | Northwest A&F<br>University                               |
| 5  | <i>Colletotrichum sp. COLG31</i>      | Sordario | Asco   | 16        | 53     | 24    | 18     | 111   | GCA_009800995.1 | University of Agriculture,<br>Faisalabad Pakistan.        |
| 6  | <i>Colletotrichum siamense</i>        | Sordario | Asco   | 16        | 53     | 23    | 18     | 110   | GCA_013390195.1 | RIKEN                                                     |
| 7  | <i>Colletotrichum fructicola</i>      | Sordario | Asco   | 15        | 52     | 24    | 18     | 109   | GCA_000319635.2 | RIKEN Plant Science<br>Center                             |
| 8  | <i>Colletotrichum viniferum</i>       | Sordario | Asco   | 16        | 51     | 23    | 19     | 109   | GCA_013201765.1 | RIKEN                                                     |
| 9  | <i>Paramyothecium roridum</i>         | Sordario | Asco   | 18        | 49     | 25    | 17     | 109   | GCA_003012165.1 | USDA, ARS, NCAUR                                          |
| 10 | <i>Colletotrichum gloeosporioides</i> | Sordario | Asco   | 15        | 52     | 24    | 18     | 109   | GCA_003243855.1 | Nanjing Forestry<br>University                            |
| 11 | <i>Colletotrichum camelliae</i>       | Sordario | Asco   | 16        | 51     | 23    | 18     | 108   | GCA_011947485.1 | Central South University<br>of Forestry and<br>Technology |
| 12 | <i>Colletotrichum karsti</i>          | Sordario | Asco   | 16        | 49     | 22    | 18     | 105   | GCA_011947395.1 | Central South University<br>of Forestry and<br>Technology |
| 13 | <i>Stagonosporopsis tanacetii</i>     | Dothideo | Asco   | 17        | 46     | 23    | 18     | 104   | GCA_000812845.1 | The University of<br>Melbourne                            |
| 14 | <i>Colletotrichum musae</i>           | Sordario | Asco   | 16        | 47     | 22    | 19     | 104   | GCA_002814275.1 | CAPES                                                     |
| 15 | <i>Cadophora sp. DSE1049</i>          | Leotio   | Asco   | 16        | 45     | 26    | 16     | 103   | GCA_003073865.1 | DOE Joint Genome<br>Institute                             |
| 16 | <i>Xylaria striata</i>                | Sordario | Asco   | 17        | 43     | 25    | 17     | 102   | GCA_002749545.1 | Zhejiang University<br>Institute of microbiology,         |
| 17 | <i>Pestalotiopsis fici</i>            | Sordario | Asco   | 15        | 46     | 23    | 18     | 102   | GCA_000516985.1 | chinese academy of<br>sciences                            |
| 18 | <i>Fusarium sp. JS1030</i>            | Sordario | Asco   | 15        | 46     | 24    | 17     | 102   | GCA_000966855.1 | Seoul National University                                 |

|    |                                    |          |      |    |    |    |    |     |                 |                                                                              |
|----|------------------------------------|----------|------|----|----|----|----|-----|-----------------|------------------------------------------------------------------------------|
| 19 | <i>Fusarium oxysporum</i>          | Sordario | Asco | 15 | 46 | 23 | 18 | 102 | GCA_001652425.1 | CSIRO                                                                        |
| 20 | <i>Hymenoscyphus herbarum</i>      | Leotio   | Asco | 18 | 43 | 22 | 19 | 102 | GCA_001414485.1 | University of Exeter                                                         |
| 21 | <i>Clonostachys rosea</i>          | Sordario | Asco | 16 | 45 | 25 | 15 | 101 | GCA_000963775.2 | Chinese Academy of Agricultural Sciences                                     |
| 22 | <i>Fusarium oxysporum</i>          | Sordario | Asco | 16 | 44 | 22 | 19 | 101 | GCA_001703215.1 | University of Amsterdam                                                      |
| 23 | <i>Fusarium oxysporum</i>          | Sordario | Asco | 15 | 45 | 23 | 18 | 101 | GCA_012610815.1 | Contact; Kurt. A. Zeller, USDA-APHIS-PPQ-S&T Washington State                |
| 24 | <i>Fusarium oxysporum</i>          | Sordario | Asco | 16 | 45 | 23 | 17 | 101 | GCA_013347345.1 | University Mount Vernon Northwestern Research and Extension Center           |
| 25 | <i>Diaporthe sp. HANT25</i>        | Sordario | Asco | 15 | 47 | 21 | 17 | 100 | GCA_013435955.1 | Faculty of Science, Mahidol University                                       |
| 26 | <i>Phialocephala subalpina</i>     | Leotio   | Asco | 16 | 45 | 24 | 15 | 100 | GCA_900073065.1 | Institute of Bioinformatics and Systems Biology                              |
| 27 | <i>Colletotrichum nymphaeae</i>    | Sordario | Asco | 15 | 47 | 21 | 17 | 100 | GCA_001563115.1 | Universidad de Salamanca                                                     |
| 28 | <i>Fusarium oxysporum</i>          | Sordario | Asco | 16 | 44 | 22 | 18 | 100 | GCA_000260075.2 | Broad Institute                                                              |
| 29 | <i>Colletotrichum scovillei</i>    | Sordario | Asco | 15 | 46 | 22 | 17 | 100 | GCA_011075155.1 | Tianjin Institute of Plant Protection                                        |
| 30 | <i>Colletotrichum acutatum</i>     | Sordario | Asco | 15 | 46 | 22 | 17 | 100 | GCA_001593745.1 | Seoul National University                                                    |
| 31 | <i>Fusarium oxysporum</i>          | Sordario | Asco | 15 | 45 | 23 | 17 | 100 | GCA_002234115.1 | University of Amsterdam                                                      |
| 32 | <i>Fusarium oxysporum</i>          | Sordario | Asco | 16 | 45 | 22 | 17 | 100 | GCA_009602545.1 | Auburn University                                                            |
| 33 | <i>Fusarium oxysporum</i>          | Sordario | Asco | 15 | 45 | 23 | 17 | 100 | GCA_002234045.1 | University of Amsterdam                                                      |
| 34 | <i>Fusarium oxysporum</i>          | Sordario | Asco | 16 | 44 | 22 | 18 | 100 | GCA_009746015.1 | University of Massachusetts Amherts                                          |
| 35 | <i>Morchella eximia</i>            | Pezizo   | Asco | 17 | 48 | 18 | 16 | 99  | GCA_003314645.1 | Kunming University of Science and Technology                                 |
| 36 | <i>Diaporthe ampelina</i>          | Sordario | Asco | 16 | 44 | 21 | 18 | 99  | GCA_001630405.1 | Bangalore University                                                         |
| 37 | <i>Diaporthe longicolla</i>        | Sordario | Asco | 16 | 45 | 20 | 18 | 99  | GCA_000800745.1 | Purdue University                                                            |
| 38 | <i>Paraphaeosphaeria sporulosa</i> | Dothideo | Asco | 17 | 41 | 24 | 17 | 99  | GCA_001642045.1 | DOE Joint Genome Institute                                                   |
| 39 | <i>Neopestalotiopsis sp. 37M</i>   | Sordario | Asco | 15 | 45 | 21 | 18 | 99  | GCA_011058875.1 | University of Campinas                                                       |
| 40 | <i>Pestalotiopsis sp. JCM 9685</i> | Sordario | Asco | 16 | 44 | 22 | 17 | 99  | GCA_001599175.1 | RIKEN Center for Life Science Technologies, Division of Genomic Technologies |
| 41 | <i>Fusarium oxysporum</i>          | Sordario | Asco | 15 | 44 | 24 | 16 | 99  | GCA_002233775.1 | University of Amsterdam                                                      |
| 42 | <i>Fusarium oxysporum</i>          | Sordario | Asco | 15 | 45 | 22 | 17 | 99  | GCA_001702785.1 | University of Amsterdam                                                      |
| 43 | <i>Fusarium decemcellulare</i>     | Sordario | Asco | 14 | 46 | 22 | 17 | 99  | GCA_013266205.1 | US Department of Agriculture, Agriculture Research Service                   |

|    |                                      |          |      |    |    |    |    |    |                 |                                                                                       |
|----|--------------------------------------|----------|------|----|----|----|----|----|-----------------|---------------------------------------------------------------------------------------|
| 44 | <i>Fusarium sp. NRRL 25184</i>       | Sordario | Asco | 16 | 44 | 22 | 17 | 99 | GCA_013755755.1 | US Department of<br>Agriculture, Agriculture<br>Research Service                      |
| 45 | <i>Fusarium oxysporum</i>            | Sordario | Asco | 15 | 45 | 22 | 17 | 99 | GCA_002234135.1 | University of Amsterdam                                                               |
| 46 | <i>Fusarium oxysporum</i>            | Sordario | Asco | 15 | 44 | 22 | 18 | 99 | GCA_002233865.1 | University of Amsterdam                                                               |
| 47 | <i>Colletotrichum sidae</i>          | Sordario | Asco | 16 | 45 | 21 | 17 | 99 | GCA_004367935.1 | RIKEN                                                                                 |
| 48 | <i>Fusarium oxysporum</i>            | Sordario | Asco | 15 | 45 | 23 | 16 | 99 | GCA_003615085.1 | NIAB-EMR                                                                              |
| 49 | <i>Fusarium oxysporum</i>            | Sordario | Asco | 15 | 44 | 23 | 17 | 99 | GCA_001702645.1 | University of Amsterdam                                                               |
| 50 | <i>Fusarium oxysporum</i>            | Sordario | Asco | 15 | 45 | 22 | 17 | 99 | GCA_002234105.1 | University of Amsterdam                                                               |
| 51 | <i>Diaporthe capsici</i>             | Sordario | Asco | 15 | 45 | 21 | 17 | 98 | GCA_013364905.1 | Sichuan agricultural<br>university                                                    |
| 52 | <i>Diaporthe sp. NJD1</i>            | Sordario | Asco | 15 | 45 | 21 | 17 | 98 | GCA_013842865.1 | Anhui Agricultural<br>University                                                      |
| 53 | <i>Colletotrichum fioriniae</i>      | Sordario | Asco | 14 | 46 | 22 | 16 | 98 | GCA_002930455.1 | VIB                                                                                   |
| 54 | <i>Colletotrichum salicis</i>        | Sordario | Asco | 15 | 45 | 21 | 17 | 98 | GCA_001563125.1 | Universidad de<br>Salamanca                                                           |
| 55 | <i>Colletotrichum simmondsii</i>     | Sordario | Asco | 14 | 46 | 22 | 16 | 98 | GCA_001563135.1 | Universidad de<br>Salamanca                                                           |
| 56 | <i>Colletotrichum truncatum</i>      | Sordario | Asco | 15 | 45 | 21 | 17 | 98 | GCA_014235925.1 | University of Salamanca                                                               |
| 57 | <i>Colletotrichum musicola</i>       | Sordario | Asco | 16 | 45 | 20 | 17 | 98 | GCA_014235935.1 | University of Salamanca                                                               |
| 58 | <i>Fusarium oxysporum</i>            | Sordario | Asco | 15 | 44 | 23 | 16 | 98 | GCA_002233805.1 | University of Amsterdam                                                               |
| 59 | <i>Fusarium oxysporum</i>            | Sordario | Asco | 15 | 45 | 22 | 16 | 98 | GCA_002233895.1 | University of Amsterdam                                                               |
| 60 | <i>Fusarium udum</i>                 | Sordario | Asco | 15 | 45 | 23 | 15 | 98 | GCA_013186905.1 | US Department of<br>Agriculture, Agriculture<br>Research Service                      |
| 61 | <i>Fusarium oxysporum</i>            | Sordario | Asco | 15 | 43 | 23 | 17 | 98 | GCA_001702695.2 | University of Amsterdam                                                               |
| 62 | <i>Aspergillus versicolor</i>        | Eurotio  | Asco | 17 | 46 | 21 | 14 | 98 | GCA_001890125.1 | DOE Joint Genome<br>Institute                                                         |
| 63 | <i>Fusarium oxysporum</i>            | Sordario | Asco | 15 | 44 | 22 | 17 | 98 | GCA_005930515.1 | RIKEN                                                                                 |
| 64 | <i>Fusarium oxysporum</i>            | Sordario | Asco | 15 | 44 | 22 | 17 | 98 | GCA_000350345.1 | BGI                                                                                   |
| 65 | <i>Gliomastix tumulicola</i>         | Sordario | Asco | 18 | 40 | 24 | 15 | 97 | GCA_001599755.1 | RIKEN Center for Life<br>Science Technologies,<br>Division of Genomic<br>Technologies |
| 66 | <i>Lachnum nothofagi</i>             | Leotio   | Asco | 16 | 42 | 21 | 18 | 97 | GCA_003988875.1 | Manaaki Whenua<br>Landcare Research                                                   |
| 67 | <i>Diaporthe aspalathi</i>           | Sordario | Asco | 15 | 43 | 21 | 18 | 97 | GCA_001447215.1 | Beltsville Agricultural<br>Research Center                                            |
| 68 | <i>Pleosporales sp. UM 1110 2012</i> | Dothideo | Asco | 16 | 39 | 25 | 17 | 97 | GCA_000263175.2 | UNIVERSITY OF MALAYA                                                                  |
| 69 | <i>Fusarium commune</i>              | Sordario | Asco | 15 | 44 | 22 | 16 | 97 | GCA_001599515.1 | RIKEN Center for Life<br>Science Technologies,<br>Division of Genomic<br>Technologies |
| 70 | <i>Fusarium oxysporum</i>            | Sordario | Asco | 16 | 42 | 22 | 17 | 97 | GCA_013423245.1 | St. Petersburg University                                                             |

|    |                                    |          |      |    |    |    |    |    |                 |                                                                              |
|----|------------------------------------|----------|------|----|----|----|----|----|-----------------|------------------------------------------------------------------------------|
| 71 | <i>Fusarium oxysporum</i>          | Sordario | Asco | 15 | 44 | 22 | 16 | 97 | GCA_003977725.1 | University of California at Davis                                            |
| 72 | <i>Fusarium oxysporum</i>          | Sordario | Asco | 15 | 43 | 23 | 16 | 97 | GCA_009755825.1 | University of Massachusetts Amherst                                          |
| 73 | <i>Colletotrichum sansevieriae</i> | Sordario | Asco | 15 | 46 | 20 | 16 | 97 | GCA_002749775.1 | Kagoshima University                                                         |
| 74 | <i>Fusarium oxysporum</i>          | Sordario | Asco | 15 | 43 | 23 | 16 | 97 | GCA_000260155.3 | Broad Institute                                                              |
| 75 | <i>Fusarium sp. Na10</i>           | Sordario | Asco | 15 | 43 | 23 | 16 | 97 | GCA_002234255.1 | University of Amsterdam                                                      |
| 76 | <i>Aaosphaeria arxii</i>           | Dothideo | Asco | 18 | 41 | 22 | 16 | 97 | GCA_010015735.1 | DOE Joint Genome Institute                                                   |
| 77 | <i>Fusarium sterilihyposum</i>     | Sordario | Asco | 15 | 43 | 22 | 17 | 97 | GCA_013186845.1 | US Department of Agriculture, Agriculture Research Service                   |
| 78 | <i>Colletotrichum orbiculare</i>   | Sordario | Asco | 15 | 44 | 21 | 17 | 97 | GCA_000350065.2 | RIKEN Plant Science Center                                                   |
| 79 | <i>Fusarium oxysporum</i>          | Sordario | Asco | 15 | 42 | 22 | 18 | 97 | GCA_000260235.2 | Broad Institute                                                              |
| 80 | <i>Colletotrichum trifolii</i>     | Sordario | Asco | 16 | 44 | 20 | 17 | 97 | GCA_004367215.1 | RIKEN                                                                        |
| 81 | <i>Hymenoscyphus salicellus</i>    | Leotio   | Asco | 16 | 42 | 20 | 19 | 97 | GCA_001414355.1 | University of Exeter                                                         |
| 82 | <i>Aspergillus sp. Z5</i>          | Eurotio  | Asco | 16 | 45 | 22 | 14 | 97 | GCA_001044295.1 | Zhejiang University                                                          |
| 83 | <i>Memnoniella echinata</i>        | Sordario | Asco | 18 | 41 | 21 | 17 | 97 | GCA_001599555.1 | RIKEN Center for Life Science Technologies, Division of Genomic Technologies |
| 84 | <i>Fusarium oxysporum</i>          | Sordario | Asco | 15 | 42 | 21 | 19 | 97 | GCA_001757345.1 | ICRISAT                                                                      |
| 85 | <i>Fusarium subglutinans</i>       | Sordario | Asco | 15 | 41 | 24 | 16 | 96 | GCA_012071885.1 | UNRC                                                                         |
| 86 | <i>Colletotrichum incanum</i>      | Sordario | Asco | 16 | 43 | 21 | 16 | 96 | GCA_001625285.1 | Max Planck Genome Center Cologne                                             |
| 87 | <i>Colletotrichum tofieldiae</i>   | Sordario | Asco | 15 | 44 | 21 | 16 | 96 | GCA_001618725.1 | Max Planck Genome Center Cologne                                             |
| 88 | <i>Aspergillus sp. MA 6041</i>     | Eurotio  | Asco | 15 | 44 | 22 | 15 | 96 | GCA_003138005.1 | University of Natural Resources and Life Sciences, Vienna                    |
| 89 | <i>Fusarium sp. NRRL 62957</i>     | Sordario | Asco | 16 | 41 | 21 | 18 | 96 | GCA_012978535.1 | US Department of Agriculture, Agriculture Research Service                   |
| 90 | <i>Fusarium phyllophilum</i>       | Sordario | Asco | 14 | 43 | 24 | 15 | 96 | GCA_013396025.1 | US Department of Agriculture, Agriculture Research Service                   |
| 91 | <i>Pezicula radicola</i>           | Leotio   | Asco | 14 | 45 | 20 | 17 | 96 | GCA_003008705.1 | The University of Texas Health Science Center at Houston                     |
| 92 | <i>Fusarium sp. NRRL 25303</i>     | Sordario | Asco | 15 | 42 | 23 | 16 | 96 | GCA_013396255.1 | US Department of Agriculture, Agriculture Research Service                   |
| 93 | <i>Aspergillus amoenus</i>         | Eurotio  | Asco | 15 | 45 | 22 | 14 | 96 | GCA_009812435.1 | Universidad de Antioquia                                                     |

|     |                                   |          |      |    |    |    |    |    |                 |                                                                                                                                                                                                                                                                                   |
|-----|-----------------------------------|----------|------|----|----|----|----|----|-----------------|-----------------------------------------------------------------------------------------------------------------------------------------------------------------------------------------------------------------------------------------------------------------------------------|
| 94  | <i>Eutypa lata</i>                | Sordario | Asco | 16 | 39 | 21 | 19 | 95 | GCA_000349385.1 | UC Davis                                                                                                                                                                                                                                                                          |
| 95  | <i>Colletotrichum sp. JS-367</i>  | Sordario | Asco | 15 | 45 | 19 | 16 | 95 | GCA_003122705.1 | National Institute of Biological Resources                                                                                                                                                                                                                                        |
| 96  | <i>Pseudogymnoascus sp. BL308</i> | Leotio   | Asco | 13 | 47 | 24 | 11 | 95 | GCA_001630595.1 | Ohio State University                                                                                                                                                                                                                                                             |
| 97  | <i>Colletotrichum plurivorum</i>  | Sordario | Asco | 15 | 45 | 18 | 17 | 95 | GCA_014235945.1 | University of Salamanca                                                                                                                                                                                                                                                           |
| 98  | <i>Aspergillus sp. MA 6037</i>    | Eurotio  | Asco | 15 | 44 | 22 | 14 | 95 | GCA_003138035.1 | University of Natural Resources and Life Sciences, Vienna                                                                                                                                                                                                                         |
| 99  | <i>Xylaria sp. MSU_SB201401</i>   | Sordario | Asco | 17 | 40 | 22 | 16 | 95 | GCA_002288965.1 | University of Arkansas Collaboration between Erik Lysøe (Department of Plant Health and Plant Protection, Bioforsk - Norwegian Institute of Agricultural and Environmental Research) and Linda Harris (Eastern Cereal & Oilseed Research Centre, Agriculture & Agri-Food Canada). |
| 100 | <i>Fusarium avenaceum</i>         | Sordario | Asco | 16 | 41 | 21 | 17 | 95 | GCA_000769295.1 | University of Pretoria                                                                                                                                                                                                                                                            |
| 101 | <i>Fusarium nygamai</i>           | Sordario | Asco | 15 | 42 | 22 | 16 | 95 | GCA_001262555.1 | DOE Joint Genome Institute                                                                                                                                                                                                                                                        |
| 102 | <i>Bimuria novae-zelandiae</i>    | Dothideo | Asco | 16 | 39 | 24 | 16 | 95 | GCA_010015655.1 | University of Amsterdam                                                                                                                                                                                                                                                           |
| 103 | <i>Fusarium oxysporum</i>         | Sordario | Asco | 14 | 42 | 23 | 16 | 95 | GCA_001703455.1 | Nakdonggang National Institute of Biological Resources                                                                                                                                                                                                                            |
| 104 | <i>Articulospora tetracladia</i>  | Leotio   | Asco | 15 | 43 | 21 | 16 | 95 | GCA_003415645.1 | RIKEN                                                                                                                                                                                                                                                                             |
| 105 | <i>Colletotrichum spinosum</i>    | Sordario | Asco | 16 | 42 | 20 | 17 | 95 | GCA_004366825.1 | Institute of Bioinformatics and Systems Biology                                                                                                                                                                                                                                   |
| 106 | <i>Fusarium mangiferae</i>        | Sordario | Asco | 14 | 42 | 24 | 15 | 95 | GCA_900044065.1 | Hamburg University                                                                                                                                                                                                                                                                |
| 107 | <i>Aspergillus sydowii</i>        | Eurotio  | Asco | 16 | 44 | 21 | 14 | 95 | GCA_009193685.1 | Broad Institute                                                                                                                                                                                                                                                                   |
| 108 | <i>Colletotrichum graminicola</i> | Sordario | Asco | 17 | 37 | 23 | 18 | 95 | GCA_000149035.1 | University of Exeter                                                                                                                                                                                                                                                              |
| 109 | <i>Hymenoscyphus infarciens</i>   | Leotio   | Asco | 16 | 40 | 20 | 19 | 95 | GCA_001414345.1 | University of Arkansas                                                                                                                                                                                                                                                            |
| 110 | <i>Stenocarpella maydis</i>       | Sordario | Asco | 17 | 39 | 21 | 17 | 94 | GCA_002270565.1 | DOE Joint Genome Institute                                                                                                                                                                                                                                                        |
| 111 | <i>Chalara longipes</i>           | Leotio   | Asco | 16 | 39 | 23 | 16 | 94 | GCA_009732865.1 | US Department of Agriculture, Agriculture Research Service                                                                                                                                                                                                                        |
| 112 | <i>Fusarium tupiense</i>          | Sordario | Asco | 14 | 42 | 23 | 15 | 94 | GCA_013364945.1 | Wageningen University & Research                                                                                                                                                                                                                                                  |
| 113 | <i>Verticillium zaregamsianum</i> | Sordario | Asco | 17 | 41 | 20 | 16 | 94 | GCA_002851755.1 |                                                                                                                                                                                                                                                                                   |



|     |                                        |          |      |    |    |    |    |    |                 |                                                                           |
|-----|----------------------------------------|----------|------|----|----|----|----|----|-----------------|---------------------------------------------------------------------------|
| 114 | <i>Fusarium oxysporum</i>              | Sordario | Asco | 15 | 42 | 21 | 16 | 94 | GCA_001888865.1 | ZhongKai University of Agriculture and Engineering                        |
| 115 | <i>Fusarium fracticaudum</i>           | Sordario | Asco | 14 | 42 | 23 | 15 | 94 | GCA_003353625.1 | Forestry and Agricultural Biotechnology Institute, University of Pretoria |
| 116 | <i>Fusarium sp. NRRL 53293</i>         | Sordario | Asco | 14 | 42 | 23 | 15 | 94 | GCA_013759125.1 | US Department of Agriculture, Agriculture Research Service                |
| 117 | <i>Fusarium pseudocircinatum</i>       | Sordario | Asco | 14 | 41 | 23 | 16 | 94 | GCA_013396035.1 | US Department of Agriculture, Agriculture Research Service                |
| 118 | <i>Paraphoma sp. B47-9</i>             | Dothideo | Asco | 15 | 43 | 21 | 15 | 94 | GCA_001748405.1 | National Institute for Agro-Environmental Sciences (NIAES)                |
| 119 | <i>Fusarium sacchari</i>               | Sordario | Asco | 14 | 43 | 22 | 15 | 94 | GCA_013759005.1 | US Department of Agriculture, Agriculture Research Service                |
| 120 | <i>Neofusicoccum kwambonambiense</i>   | Dothideo | Asco | 15 | 41 | 19 | 19 | 94 | GCA_009829855.1 | University of Pretoria                                                    |
| 121 | <i>Fusarium begoniae</i>               | Sordario | Asco | 15 | 40 | 23 | 16 | 94 | GCA_013186755.1 | US Department of Agriculture, Agriculture Research Service                |
| 122 | <i>Fusarium odoratissimum</i>          | Sordario | Asco | 14 | 42 | 23 | 15 | 94 | GCA_000260195.2 | Broad Institute                                                           |
| 123 | <i>Fusarium pininemorale</i>           | Sordario | Asco | 14 | 41 | 24 | 15 | 94 | GCA_002165215.1 | Forestry and Agricultural Biotechnology Institute                         |
| 124 | <i>Fusarium mexicanum</i>              | Sordario | Asco | 14 | 42 | 23 | 15 | 94 | GCA_013396015.1 | US Department of Agriculture, Agriculture Research Service                |
| 125 | <i>Fusarium acuminatum</i>             | Sordario | Asco | 16 | 40 | 21 | 17 | 94 | GCA_013363215.1 | US Department of Agriculture, Agriculture Research Service                |
| 126 | <i>Fusarium foetens</i>                | Sordario | Asco | 14 | 43 | 21 | 16 | 94 | GCA_013623845.1 | US Department of Agriculture, Agriculture Research Service                |
| 127 | <i>Fusarium secorum</i>                | Sordario | Asco | 15 | 42 | 21 | 16 | 94 | GCA_013363185.1 | US Department of Agriculture, Agriculture Research Service                |
| 128 | <i>Pseudopyrenochaeta lycopersici</i>  | Dothideo | Asco | 16 | 41 | 21 | 16 | 94 | GCA_003313425.1 | University of Verona                                                      |
| 129 | <i>Hymenoscyphus fructigenus</i>       | Leotio   | Asco | 16 | 39 | 21 | 18 | 94 | GCA_001414455.1 | University of Exeter                                                      |
| 130 | <i>Byssothecium circinans</i>          | Dothideo | Asco | 15 | 40 | 23 | 15 | 93 | GCA_010015675.1 | DOE Joint Genome Institute                                                |
| 131 | <i>Pseudogymnoascus sp. VKM F-3775</i> | Leotio   | Asco | 15 | 42 | 22 | 14 | 93 | GCA_000750715.1 | Moscow State University                                                   |
| 132 | <i>Colletotrichum sojae</i>            | Sordario | Asco | 14 | 44 | 19 | 16 | 93 | GCA_014235955.1 | University of Salamanca                                                   |

|     |                                                  |          |      |    |    |    |    |    |                 |                                                            |
|-----|--------------------------------------------------|----------|------|----|----|----|----|----|-----------------|------------------------------------------------------------|
| 133 | <i>Fusarium pseudoanthophilum</i>                | Sordario | Asco | 15 | 40 | 22 | 16 | 93 | GCA_013395995.1 | US Department of Agriculture, Agriculture Research Service |
| 134 | <i>Cairneyella variabilis</i>                    | Leotio   | Asco | 15 | 43 | 18 | 17 | 93 | GCA_001625345.1 | CSIRO                                                      |
| 135 | <i>Corynespora cassicola</i>                     | Dothideo | Asco | 15 | 41 | 20 | 17 | 93 | GCA_900169545.1 | UNIVERSITY OF BRISTOL                                      |
| 136 | <i>Fusarium temperatum</i>                       | Sordario | Asco | 14 | 41 | 23 | 15 | 93 | GCA_001513835.1 | Forestry and Agricultural Biotechnology Institute (FABI)   |
| 137 | <i>Fusarium anthophilum</i>                      | Sordario | Asco | 13 | 43 | 23 | 14 | 93 | GCA_013364935.1 | US Department of Agriculture, Agriculture Research Service |
| 138 | <i>Fusarium succisae</i>                         | Sordario | Asco | 14 | 42 | 22 | 15 | 93 | GCA_013186925.1 | US Department of Agriculture, Agriculture Research Service |
| 139 | <i>Phoma sp. XZ068</i>                           | Dothideo | Asco | 16 | 39 | 21 | 17 | 93 | GCA_004835665.1 | Institute Of Microbiology Chinese Academy of Sciences      |
| 140 | <i>Fusarium agapanthi</i>                        | Sordario | Asco | 14 | 42 | 21 | 16 | 93 | GCA_001654545.1 | US Department of Agriculture, Agriculture Research Service |
| 141 | <i>Fusarium ramigenum</i>                        | Sordario | Asco | 14 | 43 | 21 | 15 | 93 | GCA_013186855.1 | US Department of Agriculture, Agriculture Research Service |
| 142 | <i>Neofusicoccum cordaticola</i>                 | Dothideo | Asco | 15 | 42 | 18 | 18 | 93 | GCA_009830905.1 | University of Pretoria                                     |
| 143 | <i>Neofusicoccum parvum</i>                      | Dothideo | Asco | 15 | 42 | 17 | 19 | 93 | GCA_000385595.1 | UC Davis                                                   |
| 144 | <i>Fusarium mundagurra</i>                       | Sordario | Asco | 14 | 41 | 23 | 15 | 93 | GCA_013396205.1 | US Department of Agriculture, Agriculture Research Service |
| 145 | <i>Neofusicoccum ribis</i>                       | Dothideo | Asco | 15 | 41 | 18 | 19 | 93 | GCA_009829435.1 | University of Pretoria                                     |
| 146 | <i>Fusarium bactridioides</i>                    | Sordario | Asco | 15 | 38 | 24 | 16 | 93 | GCA_013623355.1 | US Department of Agriculture, Agriculture Research Service |
| 147 | <i>Fusarium dlamini</i>                          | Sordario | Asco | 14 | 41 | 23 | 15 | 93 | GCA_013186775.1 | US Department of Agriculture, Agriculture Research Service |
| 148 | <i>Ilyonectria destructans</i>                   | Sordario | Asco | 14 | 42 | 20 | 17 | 93 | GCA_001913115.1 | Northeast Normal University                                |
| 149 | <i>Margaritispora aquatica</i>                   | Leotio   | Asco | 14 | 42 | 21 | 16 | 93 | GCA_007644065.1 | Nakdonggang National Institute of Biological Resources     |
| 150 | <i>Pseudogymnoascus sp. VKM F-4519 (FW-2642)</i> | Leotio   | Asco | 13 | 45 | 23 | 11 | 92 | GCA_000750935.1 | Moscow State University                                    |
| 151 | <i>Phialocephala scopiformis</i>                 | Leotio   | Asco | 15 | 39 | 22 | 16 | 92 | GCA_001500285.1 | DOE Joint Genome Institute                                 |

|     |                                     |          |      |    |    |    |    |    |                 |                                                            |
|-----|-------------------------------------|----------|------|----|----|----|----|----|-----------------|------------------------------------------------------------|
| 152 | <i>Monosporascus sp. MG133</i>      | Sordario | Asco | 17 | 36 | 23 | 16 | 92 | GCA_004155925.1 | University of New Mexico                                   |
| 153 | <i>Karstenula rhodostoma</i>        | Dothideo | Asco | 16 | 38 | 21 | 17 | 92 | GCA_010093485.1 | DOE Joint Genome Institute                                 |
| 154 | <i>Verticillium klebahnii</i>       | Sordario | Asco | 17 | 38 | 20 | 17 | 92 | GCA_002851715.1 | Wageningen University & Research                           |
| 155 | <i>Dactylonectria macrodidyma</i>   | Sordario | Asco | 14 | 43 | 20 | 15 | 92 | GCA_000935225.1 | USDA-ARS                                                   |
| 156 | <i>Melanomma pulvis-pyrius</i>      | Dothideo | Asco | 15 | 39 | 21 | 17 | 92 | GCA_010093585.1 | DOE Joint Genome Institute                                 |
| 157 | <i>Colletotrichum higginsianum</i>  | Sordario | Asco | 15 | 40 | 20 | 17 | 92 | GCA_001672515.1 | GATC Biotech AG                                            |
| 158 | <i>Fusarium guttiforme</i>          | Sordario | Asco | 14 | 41 | 22 | 15 | 92 | GCA_013186795.1 | US Department of Agriculture, Agriculture Research Service |
| 159 | <i>Dactylonectria torresensis</i>   | Sordario | Asco | 14 | 41 | 21 | 16 | 92 | GCA_011426275.1 | AIT-Austrian Institute of Technology                       |
| 160 | <i>Lophiotrema nucula</i>           | Dothideo | Asco | 15 | 41 | 19 | 17 | 92 | GCA_010015825.1 | DOE Joint Genome Institute                                 |
| 161 | <i>Trematosphaeria pertusa</i>      | Dothideo | Asco | 16 | 38 | 21 | 17 | 92 | GCA_010094035.1 | DOE Joint Genome Institute                                 |
| 162 | <i>Fusarium citri</i>               | Sordario | Asco | 16 | 40 | 20 | 16 | 92 | GCA_004367485.1 | US Department of Agriculture, Agriculture Research Service |
| 163 | <i>Fusarium albosuccineum</i>       | Sordario | Asco | 14 | 41 | 19 | 18 | 92 | GCA_012931995.1 | US Department of Agriculture, Agriculture Research Service |
| 164 | <i>Fusarium verticillioides</i>     | Sordario | Asco | 14 | 39 | 23 | 16 | 92 | GCA_003317015.2 | CSIRO                                                      |
| 165 | <i>Fusarium proliferatum</i>        | Sordario | Asco | 14 | 41 | 22 | 15 | 92 | GCA_003290285.1 | University of Pisa                                         |
| 166 | <i>Colletotrichum destructivum</i>  | Sordario | Asco | 15 | 40 | 21 | 16 | 92 | GCA_009900065.1 | Chinese Academy of Agricultural Sciences                   |
| 167 | <i>Colletotrichum orchidophilum</i> | Sordario | Asco | 15 | 40 | 19 | 18 | 92 | GCA_001831195.1 | University of Western Brittany                             |
| 168 | <i>Fusarium fractiflexum</i>        | Sordario | Asco | 14 | 41 | 22 | 15 | 92 | GCA_013758875.1 | US Department of Agriculture, Agriculture Research Service |
| 169 | <i>Fusarium fujikuroi</i>           | Sordario | Asco | 14 | 41 | 22 | 15 | 92 | GCA_900096635.1 | Technische Universitat Munchen - WZW                       |
| 170 | <i>Fusarium tricinctum</i>          | Sordario | Asco | 14 | 40 | 22 | 16 | 92 | GCA_900382705.2 | INRA (Nouvelle-Aquitaine-Bordeaux)                         |
| 171 | <i>Hymenoscyphus scutula</i>        | Leotio   | Asco | 15 | 39 | 20 | 18 | 92 | GCA_001399465.1 | University of Exeter                                       |
| 172 | <i>Fusarium concolor</i>            | Sordario | Asco | 15 | 39 | 21 | 17 | 92 | GCA_013184415.1 | US Department of Agriculture, Agriculture Research Service |

|     |                                  |          |      |    |    |    |    |    |                 |                                                            |
|-----|----------------------------------|----------|------|----|----|----|----|----|-----------------|------------------------------------------------------------|
| 173 | <i>Fusarium sp. NRRL 29148</i>   | Sordario | Asco | 15 | 39 | 21 | 17 | 92 | GCA_013759095.1 | US Department of Agriculture, Agriculture Research Service |
| 174 | <i>Xylaria flabelliformis</i>    | Sordario | Asco | 17 | 38 | 20 | 17 | 92 | GCA_007182795.1 | Vanderbilt University                                      |
| 175 | <i>Fusarium phaseoli</i>         | Sordario | Asco | 15 | 40 | 20 | 17 | 92 | GCA_013364925.1 | US Department of Agriculture, Agriculture Research Service |
| 176 | <i>Calonectria leucothoes</i>    | Sordario | Asco | 15 | 39 | 22 | 16 | 92 | GCA_002179835.1 | USDA-ARS                                                   |
| 177 | <i>Fusarium sp. JS626</i>        | Sordario | Asco | 14 | 42 | 20 | 16 | 92 | GCA_000966865.1 | Seoul National University                                  |
| 178 | <i>Pyrenochaeta sp. DS3sAY3a</i> | Dothideo | Asco | 15 | 40 | 21 | 16 | 92 | GCA_001644535.1 | DOE Joint Genome Institute                                 |
| 179 | <i>Ophiobolus disseminans</i>    | Dothideo | Asco | 16 | 37 | 22 | 17 | 92 | GCA_010093685.1 | DOE Joint Genome Institute                                 |
| 180 | <i>Aspergillus steynii</i>       | Eurotio  | Asco | 15 | 43 | 19 | 15 | 92 | GCA_002849105.1 | DOE Joint Genome Institute                                 |
| 181 | <i>Hyaloscypha variabilis</i>    | Leotio   | Asco | 14 | 40 | 22 | 15 | 91 | GCA_002865655.1 | DOE Joint Genome Institute                                 |
| 182 | <i>Zopfia rhizophila</i>         | Dothideo | Asco | 15 | 38 | 22 | 16 | 91 | GCA_010093925.1 | DOE Joint Genome Institute                                 |
| 183 | <i>Phaeoacremonium minimum</i>   | Sordario | Asco | 15 | 42 | 19 | 15 | 91 | GCA_000392275.1 | UC Davis                                                   |
| 184 | <i>Colletotrichum coccodes</i>   | Sordario | Asco | 15 | 41 | 20 | 15 | 91 | GCA_002249775.1 | USDA-ARS                                                   |
| 185 | <i>Verticillium isaacii</i>      | Sordario | Asco | 17 | 38 | 19 | 17 | 91 | GCA_002851775.1 | Wageningen University & Research                           |
| 186 | <i>Fusarium sp. QHM</i>          | Sordario | Asco | 14 | 38 | 24 | 15 | 91 | GCA_013416755.1 | Liaoning Technical University                              |
| 187 | <i>Fusarium sp. BWC</i>          | Sordario | Asco | 14 | 38 | 24 | 15 | 91 | GCA_013416785.1 | Liaoning Technical University                              |
| 188 | <i>Fusarium musae</i>            | Sordario | Asco | 15 | 38 | 22 | 16 | 91 | GCA_013623345.1 | US Department of Agriculture, Agriculture Research Service |
| 189 | <i>Fusarium bulbicola</i>        | Sordario | Asco | 14 | 40 | 22 | 15 | 91 | GCA_013758895.1 | US Department of Agriculture, Agriculture Research Service |
| 190 | <i>Fusarium oxysporum</i>        | Sordario | Asco | 13 | 41 | 21 | 16 | 91 | GCA_014154955.1 | University of Amsterdam                                    |
| 191 | <i>Lachnellula suecica</i>       | Leotio   | Asco | 16 | 38 | 19 | 18 | 91 | GCA_007825345.1 | Canadian Food Inspection Agency (CFIA)                     |
| 192 | <i>fungal sp. EF0021</i>         | 0        | 0    | 16 | 37 | 22 | 16 | 91 | GCA_000292665.1 | Fraunhofer                                                 |
| 193 | <i>Fusarium beomiforme</i>       | Sordario | Asco | 16 | 38 | 20 | 17 | 91 | GCA_002980475.2 | US Department of Agriculture, Agriculture Research Service |
| 194 | <i>Massarina eburnea</i>         | Dothideo | Asco | 16 | 36 | 23 | 16 | 91 | GCA_010093635.1 | DOE Joint Genome Institute                                 |

|     |                                                  |          |      |    |    |    |    |    |                 |                                                                              |
|-----|--------------------------------------------------|----------|------|----|----|----|----|----|-----------------|------------------------------------------------------------------------------|
| 195 | <i>Fusarium pseudonygamai</i>                    | Sordario | Asco | 14 | 41 | 22 | 14 | 91 | GCA_013186785.1 | US Department of Agriculture, Agriculture Research Service                   |
| 196 | <i>Fusarium tjaetaba</i>                         | Sordario | Asco | 14 | 40 | 22 | 15 | 91 | GCA_013396195.1 | US Department of Agriculture, Agriculture Research Service                   |
| 197 | <i>Fusarium globosum</i>                         | Sordario | Asco | 14 | 39 | 22 | 16 | 91 | GCA_013396165.1 | US Department of Agriculture, Agriculture Research Service                   |
| 198 | <i>Stagonospora sp. SRC1IsM3a</i>                | Dothideo | Asco | 17 | 34 | 22 | 18 | 91 | GCA_001644525.1 | DOE Joint Genome Institute                                                   |
| 199 | <i>Aspergillus flavus</i>                        | Eurotio  | Asco | 16 | 40 | 18 | 17 | 91 | GCA_004150275.1 | The Energy and Resources Institute                                           |
| 200 | <i>Monosporascus sp. mg162</i>                   | Sordario | Asco | 16 | 39 | 20 | 16 | 91 | GCA_004155945.1 | University of New Mexico                                                     |
| 201 | <i>Colletotrichum lindemuthianum</i>             | Sordario | Asco | 15 | 43 | 16 | 17 | 91 | GCA_001693025.2 | Universidade Federal de Vicosa                                               |
| 202 | <i>Fusarium coicis</i>                           | Sordario | Asco | 15 | 39 | 21 | 16 | 91 | GCA_013781345.1 | US Department of Agriculture, Agriculture Research Service                   |
| 203 | <i>Ilyonectria mors-panacis</i>                  | Sordario | Asco | 14 | 40 | 21 | 16 | 91 | GCA_002991585.1 | Zhejiang Sci-Tech University                                                 |
| 204 | <i>Alternaria alternata</i>                      | Dothideo | Asco | 15 | 36 | 23 | 17 | 91 | GCA_011420255.1 | National Institute of Biological Resources                                   |
| 205 | <i>Phoma herbarum</i>                            | Dothideo | Asco | 16 | 39 | 20 | 16 | 91 | GCA_001599375.1 | RIKEN Center for Life Science Technologies, Division of Genomic Technologies |
| 206 | <i>Neofusicoccum umdonicola</i>                  | Dothideo | Asco | 15 | 40 | 18 | 18 | 91 | GCA_009829365.1 | University of Pretoria                                                       |
| 207 | <i>Didymella heteroderae</i>                     | Dothideo | Asco | 16 | 39 | 20 | 16 | 91 | GCA_011058895.1 | University of Campinas                                                       |
| 208 | <i>Cudoniella acicularis</i>                     | Leotio   | Asco | 15 | 40 | 20 | 16 | 91 | GCA_013054445.1 | TU Dresden - IHI Zittau                                                      |
| 209 | <i>Nigrograna mackinnonii</i>                    | Dothideo | Asco | 16 | 37 | 23 | 15 | 91 | GCA_001007845.1 | Yale University                                                              |
| 210 | <i>Plenodomus tracheiphilus</i>                  | Dothideo | Asco | 17 | 37 | 21 | 16 | 91 | GCA_010093695.1 | DOE Joint Genome Institute                                                   |
| 211 | <i>Lasiodiplodia theobromae</i>                  | Dothideo | Asco | 16 | 39 | 18 | 18 | 91 | GCA_012971845.1 | Beltsville Agricultural Research Center                                      |
| 212 | <i>Fusarium sp. NRRL 22101</i>                   | Sordario | Asco | 14 | 39 | 19 | 18 | 90 | GCA_013010345.1 | US Department of Agriculture, Agriculture Research Service                   |
| 213 | <i>Verticillium longisporum</i>                  | Sordario | Asco | 17 | 37 | 18 | 18 | 90 | GCA_001268165.1 | SLU                                                                          |
| 214 | <i>Ophiognomonia clavignenti-juglandacearum</i>  | Sordario | Asco | 14 | 40 | 19 | 17 | 90 | GCA_003671545.1 | Colorado State U                                                             |
| 215 | <i>Pseudogymnoascus sp. VKM F-4517 (FW-2822)</i> | Leotio   | Asco | 13 | 41 | 24 | 12 | 90 | GCA_000750875.1 | Moscow State University                                                      |
| 216 | <i>Pseudogymnoascus sp. 24MN13</i>               | Leotio   | Asco | 12 | 43 | 24 | 11 | 90 | GCA_001662595.1 | US Forest Service                                                            |

|     |                                                  |          |      |    |    |    |    |    |                 |                                                                              |
|-----|--------------------------------------------------|----------|------|----|----|----|----|----|-----------------|------------------------------------------------------------------------------|
| 217 | <i>Fusarium sp. NRRL 66182</i>                   | Sordario | Asco | 12 | 42 | 20 | 16 | 90 | GCA_013266265.1 | US Department of Agriculture, Agriculture Research Service                   |
| 218 | <i>Monosporascus sp. CRB-9-2</i>                 | Sordario | Asco | 15 | 38 | 20 | 17 | 90 | GCA_004155915.1 | University of New Mexico                                                     |
| 219 | <i>Pseudogymnoascus sp. VKM F-4518 (FW-2643)</i> | Leotio   | Asco | 15 | 42 | 20 | 13 | 90 | GCA_000750925.1 | Moscow State University                                                      |
| 220 | <i>Fusarium sp. NRRL 62610</i>                   | Sordario | Asco | 15 | 40 | 18 | 17 | 90 | GCA_013186425.2 | US Department of Agriculture, Agriculture Research Service                   |
| 221 | <i>Rosellinia necatrix</i>                       | Sordario | Asco | 17 | 38 | 20 | 15 | 90 | GCA_001445595.3 | NARO Institute of Fruit Tree Science                                         |
| 222 | <i>Beverwykella pulmonaria</i>                   | Dothideo | Asco | 16 | 38 | 19 | 17 | 90 | GCA_001599595.1 | RIKEN Center for Life Science Technologies, Division of Genomic Technologies |
| 223 | <i>Fusarium newnesense</i>                       | Sordario | Asco | 14 | 39 | 22 | 15 | 90 | GCA_013184375.1 | US Department of Agriculture, Agriculture Research Service                   |
| 224 | <i>Setomelanomma holmii</i>                      | Dothideo | Asco | 15 | 37 | 21 | 17 | 90 | GCA_010015745.1 | DOE Joint Genome Institute                                                   |
| 225 | <i>Pezicula neosporulosa</i>                     | Leotio   | Asco | 14 | 41 | 19 | 16 | 90 | GCA_009805495.1 | Chinese Academy of Forestry                                                  |
| 226 | <i>Colletotrichum capsici</i>                    | Sordario | Asco | 15 | 42 | 18 | 15 | 90 | GCA_011947275.1 | KLEF Deemed to be University                                                 |
| 227 | <i>Colletotrichum chlorophyti</i>                | Sordario | Asco | 15 | 40 | 18 | 17 | 90 | GCA_001937105.1 | RIKEN                                                                        |
| 228 | <i>Fusarium metavorans</i>                       | Sordario | Asco | 15 | 39 | 19 | 17 | 90 | GCA_001633045.1 | USDA-ARS                                                                     |
| 229 | <i>Helminthosporium solani</i>                   | Dothideo | Asco | 16 | 36 | 21 | 17 | 90 | GCA_000498615.1 | University of Wisconsin-Madison                                              |
| 230 | <i>Cladosporium sp. SL-16</i>                    | Dothideo | Asco | 15 | 40 | 20 | 15 | 90 | GCA_002921095.1 | Chinese academy of agricultural sciences                                     |
| 231 | <i>Clavariopsis aquatica</i>                     | Sordario | Asco | 18 | 35 | 19 | 18 | 90 | GCA_013620735.1 | Leibniz-Institute of Freshwater Ecology and Inland Fisheries                 |
| 232 | <i>Pseudomassariella vexata</i>                  | Sordario | Asco | 15 | 41 | 18 | 16 | 90 | GCA_002105095.1 | DOE Joint Genome Institute                                                   |
| 233 | <i>Coleophoma cylindrospora</i>                  | Leotio   | Asco | 16 | 39 | 19 | 16 | 90 | GCA_003369665.1 | The University of Texas Health Science Center at Houston                     |
| 234 | <i>Preussia sp. BSL10</i>                        | Dothideo | Asco | 17 | 38 | 20 | 15 | 90 | GCA_001553865.1 | Macrogen, Korea                                                              |
| 235 | <i>Didymella pinodes</i>                         | Dothideo | Asco | 15 | 40 | 18 | 17 | 90 | GCA_004151525.1 | Curtin University                                                            |
| 236 | <i>Alternaria burnsii</i>                        | Dothideo | Asco | 15 | 37 | 22 | 16 | 90 | GCA_013036055.1 | Northwest A&F University                                                     |
| 237 | <i>Alternaria consortialis</i>                   | Dothideo | Asco | 16 | 36 | 22 | 16 | 90 | GCA_001950455.1 | RIKEN Center for Life Science Technologies,                                  |

|     |                                       |          |      |    |    |    |    |    |                 |                                                            |
|-----|---------------------------------------|----------|------|----|----|----|----|----|-----------------|------------------------------------------------------------|
| 238 | <i>Hymenotorrendiella dingleyae</i>   | Leotio   | Asco | 16 | 37 | 19 | 18 | 90 | GCA_003988905.1 | Division of Genomic Technologies                           |
| 239 | <i>Calonectria naviculata</i>         | Sordario | Asco | 14 | 39 | 21 | 15 | 89 | GCA_003031705.1 | Manaaki Whenua Landcare Research                           |
| 240 | <i>Clohesyomyces aquaticus</i>        | Dothideo | Asco | 17 | 34 | 21 | 17 | 89 | GCA_002105025.1 | USDA-ARS                                                   |
| 241 | <i>Verticillium albo-atrum</i>        | Sordario | Asco | 17 | 39 | 18 | 15 | 89 | GCA_002851705.1 | DOE Joint Genome Institute                                 |
| 242 | <i>Pseudogymnoascus sp. VKM F-103</i> | Leotio   | Asco | 12 | 43 | 23 | 11 | 89 | GCA_000750895.1 | Wageningen University & Research                           |
| 243 | <i>Pseudogymnoascus verrucosus</i>    | Leotio   | Asco | 12 | 43 | 24 | 10 | 89 | GCA_001662655.1 | Moscow State University                                    |
| 244 | <i>Verticillium tricorpus</i>         | Sordario | Asco | 17 | 37 | 19 | 16 | 89 | GCA_002851695.1 | US Forest Service                                          |
| 245 | <i>Periconia macrospinoso</i>         | Dothideo | Asco | 17 | 34 | 21 | 17 | 89 | GCA_003073855.1 | Wageningen University & Research                           |
| 246 | <i>Lophiostoma macrostomum</i>        | Dothideo | Asco | 16 | 35 | 21 | 17 | 89 | GCA_010405375.1 | DOE Joint Genome Institute                                 |
| 247 | <i>Helotiales sp. F229</i>            | Leotio   | Asco | 15 | 37 | 21 | 16 | 89 | GCA_002554605.1 | DOE Joint Genome Institute                                 |
| 248 | <i>Fusarium denticulatum</i>          | Sordario | Asco | 14 | 39 | 20 | 16 | 89 | GCA_013396175.1 | CEPLAS/University of Cologne                               |
| 249 | <i>Fusarium tuaranense</i>            | Sordario | Asco | 14 | 40 | 18 | 17 | 89 | GCA_013363205.1 | US Department of Agriculture, Agriculture Research Service |
| 250 | <i>Monosporascus sp. CRB-8-3</i>      | Sordario | Asco | 15 | 38 | 21 | 15 | 89 | GCA_004155055.1 | US Department of Agriculture, Agriculture Research Service |
| 251 | <i>Colletotrichum sublineola</i>      | Sordario | Asco | 15 | 37 | 21 | 16 | 89 | GCA_001951195.1 | University of New Mexico                                   |
| 252 | <i>Fusarium thapsinum</i>             | Sordario | Asco | 14 | 37 | 21 | 17 | 89 | GCA_013186935.1 | University of Kentucky                                     |
| 253 | <i>Aspergillus fumigatiaffinis</i>    | Eurotio  | Asco | 15 | 39 | 20 | 15 | 89 | GCA_012656285.1 | US Department of Agriculture, Agriculture Research Service |
| 254 | <i>Verticillium nubilum</i>           | Sordario | Asco | 16 | 38 | 18 | 17 | 89 | GCA_002851675.1 | Research Service UNICAMP                                   |
| 255 | <i>Fusarium vanettenii</i>            | Sordario | Asco | 15 | 39 | 18 | 17 | 89 | GCA_000151355.1 | Wageningen University & Research                           |
| 256 | <i>Phaeosphaeria sp. A1 3.1a</i>      | Dothideo | Asco | 16 | 34 | 23 | 16 | 89 | GCA_003501895.1 | DOE Joint Genome Institute                                 |
| 257 | <i>Phaeosphaeria sp. H6.2b</i>        | Dothideo | Asco | 16 | 34 | 23 | 16 | 89 | GCA_003503105.1 | Centre for Crop & Disease Management, Curtin University    |

|     |                                                 |          |      |    |    |    |    |    |                 |                                                            |
|-----|-------------------------------------------------|----------|------|----|----|----|----|----|-----------------|------------------------------------------------------------|
| 258 | <i>Fusarium anguioides</i>                      | Sordario | Asco | 16 | 35 | 20 | 18 | 89 | GCA_012977745.1 | US Department of Agriculture, Agriculture Research Service |
| 259 | <i>Aspergillus sergii</i>                       | Eurotio  | Asco | 16 | 41 | 15 | 17 | 89 | GCA_009193525.1 | DOE Joint Genome Institute                                 |
| 260 | <i>Fusarium circinatum</i>                      | Sordario | Asco | 14 | 40 | 19 | 16 | 89 | GCA_000497325.3 | Pitch canker sequencing project                            |
| 261 | <i>Didymella keratinophila</i>                  | Dothideo | Asco | 15 | 39 | 20 | 15 | 89 | GCA_011058865.1 | University of Campinas                                     |
| 262 | <i>Alternaria tenuissima</i>                    | Dothideo | Asco | 15 | 36 | 22 | 16 | 89 | GCA_004156035.1 | NIAB-East Malling Research                                 |
| 263 | <i>Alternaria arborescens</i>                   | Dothideo | Asco | 16 | 35 | 22 | 16 | 89 | GCA_004634205.1 | USFDA                                                      |
| 264 | <i>Xylaria multiplex</i>                        | Sordario | Asco | 17 | 37 | 20 | 15 | 89 | GCA_011057905.1 | TU Dresden - IHI Zittau                                    |
| 265 | <i>Aspergillus ustus</i>                        | Eurotio  | Asco | 15 | 39 | 22 | 13 | 89 | GCA_000812125.1 | Institute of developmentive and regenerative biology       |
| 266 | <i>Lasiodiplodia pseudotheobromae</i>           | Dothideo | Asco | 16 | 38 | 16 | 19 | 89 | GCA_009829805.1 | University of Pretoria                                     |
| 267 | <i>Didymella segeticola</i>                     | Dothideo | Asco | 16 | 39 | 17 | 17 | 89 | GCA_004522025.1 | Guizhou University                                         |
| 268 | <i>Pseudogymnoascus sp. 04NY16</i>              | Leotio   | Asco | 12 | 43 | 22 | 11 | 88 | GCA_001630575.1 | Ohio State University                                      |
| 269 | <i>Monosporascus sp. 5C6A</i>                   | Sordario | Asco | 17 | 36 | 19 | 16 | 88 | GCA_004155035.1 | University of New Mexico                                   |
| 270 | <i>Pseudogymnoascus sp. VKM F-4513 (FW-928)</i> | Leotio   | Asco | 12 | 43 | 22 | 11 | 88 | GCA_000750755.1 | Moscow State University                                    |
| 271 | <i>Pseudogymnoascus sp. VKM F-4514 (FW-929)</i> | Leotio   | Asco | 13 | 38 | 24 | 13 | 88 | GCA_000750795.1 | Moscow State University                                    |
| 272 | <i>Colletotrichum tanacetii</i>                 | Sordario | Asco | 16 | 38 | 18 | 16 | 88 | GCA_005350895.1 | The University of Melbourne                                |
| 273 | <i>Diaporthe helianthi</i>                      | Sordario | Asco | 14 | 39 | 18 | 17 | 88 | GCA_001702395.2 | University of Western Brittany                             |
| 274 | <i>Pseudogymnoascus pannorum</i>                | Leotio   | Asco | 13 | 41 | 22 | 12 | 88 | GCA_001630605.1 | Ohio State University                                      |
| 275 | <i>Fusarium sarcochrom</i>                      | Sordario | Asco | 13 | 41 | 18 | 16 | 88 | GCA_013266185.1 | US Department of Agriculture, Agriculture Research Service |
| 276 | <i>Aspergillus calidoustus</i>                  | Eurotio  | Asco | 14 | 41 | 21 | 12 | 88 | GCA_001511075.1 | HKI JENA                                                   |
| 277 | <i>Xylaria longipes</i>                         | Sordario | Asco | 17 | 33 | 20 | 18 | 88 | GCA_003426265.1 | IHI Zittau / TU Dresden                                    |
| 278 | <i>[Nectria] haematococca</i>                   | Sordario | Asco | 14 | 39 | 19 | 16 | 88 | GCA_010015875.1 | Lishui University                                          |
| 279 | <i>Fusarium xylarioides</i>                     | Sordario | Asco | 14 | 40 | 19 | 15 | 88 | GCA_013183765.1 | University of Pretoria                                     |
| 280 | <i>Fusarium sp. NRRL 66088</i>                  | Sordario | Asco | 14 | 39 | 18 | 17 | 88 | GCA_013186415.1 | US Department of Agriculture, Agriculture Research Service |
| 281 | <i>Cladosporium cladosporioides</i>             | Dothideo | Asco | 16 | 35 | 22 | 15 | 88 | GCA_002901145.1 | Yeungnam University                                        |
| 282 | <i>Fusarium algeriense</i>                      | Sordario | Asco | 15 | 36 | 21 | 16 | 88 | GCA_002982035.1 | US Department of Agriculture, Agriculture Research Service |



|     |                                       |          |      |    |    |    |    |    |                 |                                                            |
|-----|---------------------------------------|----------|------|----|----|----|----|----|-----------------|------------------------------------------------------------|
| 283 | <i>Fusarium brevicatenuatum</i>       | Sordario | Asco | 14 | 38 | 21 | 15 | 88 | GCA_013363135.1 | US Department of Agriculture, Agriculture Research Service |
| 284 | <i>Fusarium napiforme</i>             | Sordario | Asco | 14 | 38 | 21 | 15 | 88 | GCA_013396005.1 | US Department of Agriculture, Agriculture Research Service |
| 285 | <i>Xylaria sp. BCC 1067</i>           | Sordario | Asco | 17 | 35 | 20 | 16 | 88 | GCA_005188305.1 | King Mongkut's University of Technology Thonburi           |
| 286 | <i>Fusarium burgessii</i>             | Sordario | Asco | 16 | 35 | 20 | 17 | 88 | GCA_002980515.1 | US Department of Agriculture, Agriculture Research Service |
| 287 | <i>Fusarium sp. NRRL 52700</i>        | Sordario | Asco | 13 | 39 | 22 | 14 | 88 | GCA_013396095.1 | US Department of Agriculture, Agriculture Research Service |
| 288 | <i>Polyplosphaeria fusca</i>          | Dothideo | Asco | 16 | 34 | 22 | 16 | 88 | GCA_010093805.1 | DOE Joint Genome Institute                                 |
| 289 | <i>Calonectria aciculata</i>          | Sordario | Asco | 14 | 37 | 22 | 15 | 88 | GCA_013406995.1 | FABI                                                       |
| 290 | <i>Calonectria honghensis</i>         | Sordario | Asco | 14 | 38 | 21 | 15 | 88 | GCA_013403855.1 | FABI                                                       |
| 291 | <i>Calonectria fujianensis</i>        | Sordario | Asco | 14 | 37 | 21 | 16 | 88 | GCA_013406965.1 | FABI                                                       |
| 292 | <i>Fusarium sp. NRRL 47473</i>        | Sordario | Asco | 13 | 38 | 23 | 14 | 88 | GCA_013759115.1 | US Department of Agriculture, Agriculture Research Service |
| 293 | <i>Alternaria atra</i>                | Dothideo | Asco | 16 | 34 | 22 | 16 | 88 | GCA_004634305.1 | USFDA                                                      |
| 294 | <i>Fusarium gaditjirri</i>            | Sordario | Asco | 15 | 36 | 21 | 16 | 88 | GCA_013266175.1 | US Department of Agriculture, Agriculture Research Service |
| 295 | <i>Stemphylium vesicarium</i>         | Dothideo | Asco | 15 | 35 | 21 | 17 | 88 | GCA_004380135.1 | University of Bologna                                      |
| 296 | <i>Fusarium venenatum</i>             | Sordario | Asco | 14 | 38 | 20 | 16 | 88 | GCA_900007375.1 | ROTHAMSTED RESEARCH                                        |
| 297 | <i>Fusarium nisikadoi</i>             | Sordario | Asco | 14 | 37 | 22 | 15 | 88 | GCA_013623555.1 | US Department of Agriculture, Agriculture Research Service |
| 298 | <i>Epicoccum sorghinum</i>            | Dothideo | Asco | 17 | 36 | 20 | 15 | 88 | GCA_001879705.1 | University of Sao Paulo                                    |
| 299 | <i>Fusarium ambrosium</i>             | Sordario | Asco | 15 | 37 | 19 | 17 | 88 | GCA_003947045.1 | University of California, Riverside                        |
| 300 | <i>Alternaria sp. MG1</i>             | Dothideo | Asco | 15 | 35 | 22 | 16 | 88 | GCA_003574525.1 | Northwestern Polytechnical University                      |
| 301 | <i>Parastagonospora nodorum</i>       | Dothideo | Asco | 16 | 32 | 23 | 17 | 88 | GCA_002267045.1 | North Dakota State University                              |
| 302 | <i>Rutstroemia sp. NJR-2017a BVV2</i> | Leotio   | Asco | 15 | 36 | 22 | 15 | 88 | GCA_002946415.1 | Brigham Young University                                   |
| 303 | <i>Alternaria solani</i>              | Dothideo | Asco | 15 | 35 | 22 | 16 | 88 | GCA_002837235.1 | Institute Of Microbiology Chinese Academy of Sciences      |

|     |                                                  |          |      |    |    |    |    |    |                 |                                                               |
|-----|--------------------------------------------------|----------|------|----|----|----|----|----|-----------------|---------------------------------------------------------------|
| 304 | <i>Calonectria pseudoreteaudii</i>               | Sordario | Asco | 14 | 39 | 20 | 15 | 88 | GCA_001879505.1 | Fujian Agriculture and Forestry University                    |
| 305 | <i>Fusarium incarnatum</i>                       | Sordario | Asco | 15 | 36 | 21 | 16 | 88 | GCA_004367075.1 | US Department of Agriculture, Agriculture Research Service    |
| 306 | <i>Byssochlamys sp. IMV 00045</i>                | Eurotio  | Asco | 16 | 38 | 19 | 15 | 88 | GCA_001931905.2 | Jet Propulsion Laboratory, California Institute of Technology |
| 307 | <i>Aureobasidium pullulans</i>                   | Dothideo | Asco | 16 | 35 | 20 | 17 | 88 | GCA_000721785.1 | DOE Joint Genome Institute                                    |
| 308 | <i>Pseudogymnoascus sp. VKM F-4515 (FW-2607)</i> | Leotio   | Asco | 12 | 41 | 23 | 11 | 87 | GCA_000750805.1 | Moscow State University                                       |
| 309 | <i>Pseudogymnoascus sp. VKM F-4520 (FW-2644)</i> | Leotio   | Asco | 12 | 42 | 22 | 11 | 87 | GCA_000750995.1 | Moscow State University                                       |
| 310 | <i>Pseudogymnoascus sp. VKM F-4246</i>           | Leotio   | Asco | 12 | 44 | 21 | 10 | 87 | GCA_000750735.1 | Moscow State University                                       |
| 311 | <i>Colletotrichum shioi</i>                      | Sordario | Asco | 14 | 40 | 19 | 14 | 87 | GCA_006783085.1 | RIKEN                                                         |
| 312 | <i>Pseudogymnoascus sp. VKM F-3557</i>           | Leotio   | Asco | 13 | 39 | 23 | 12 | 87 | GCA_000750665.1 | Moscow State University                                       |
| 313 | <i>Pseudogymnoascus sp. BL549</i>                | Leotio   | Asco | 13 | 41 | 22 | 11 | 87 | GCA_001630585.1 | Ohio State University                                         |
| 314 | <i>Macrophomina phaseolina</i>                   | Dothideo | Asco | 14 | 40 | 17 | 16 | 87 | GCA_008729105.1 | USDA                                                          |
| 315 | <i>Arthrinium malaysianum</i>                    | Sordario | Asco | 16 | 34 | 21 | 16 | 87 | GCA_006508115.1 | Indian Institute Of Chemical biology                          |
| 316 | <i>Aspergillus udagawae</i>                      | Eurotio  | Asco | 15 | 36 | 21 | 15 | 87 | GCA_010724255.1 | Medical Mycology Research Center                              |
| 317 | <i>Fusarium flagelliforme</i>                    | Sordario | Asco | 15 | 36 | 20 | 16 | 87 | GCA_004367175.1 | US Department of Agriculture, Agriculture Research Service    |
| 318 | <i>Kretzschmaria deusta</i>                      | Sordario | Asco | 15 | 38 | 19 | 15 | 87 | GCA_002081935.3 | IHI Zittau / TU Dresden                                       |
| 319 | <i>Fusarium babinda</i>                          | Sordario | Asco | 14 | 38 | 19 | 16 | 87 | GCA_012977765.1 | US Department of Agriculture, Agriculture Research Service    |
| 320 | <i>Cylindrocarpon cylindroides</i>               | Sordario | Asco | 17 | 39 | 17 | 14 | 87 | GCA_013756995.1 | US Department of Agriculture, Agriculture Research Service    |
| 321 | <i>Fusarium austroafricanum</i>                  | Sordario | Asco | 15 | 34 | 22 | 16 | 87 | GCA_012932025.1 | US Department of Agriculture, Agriculture Research Service    |
| 322 | <i>Laburnicola sp. R22_1</i>                     | Dothideo | Asco | 15 | 37 | 21 | 14 | 87 | GCA_014281115.1 | Chinese Academy of Forestry                                   |
| 323 | <i>Bipolaris oryzae</i>                          | Dothideo | Asco | 16 | 34 | 20 | 17 | 87 | GCA_000523455.1 | JGI                                                           |
| 324 | <i>Bipolaris zeicola</i>                         | Dothideo | Asco | 16 | 34 | 20 | 17 | 87 | GCA_000523435.1 | JGI                                                           |
| 325 | <i>Pleomassaria siparia</i>                      | Dothideo | Asco | 15 | 36 | 20 | 16 | 87 | GCA_010093715.1 | DOE Joint Genome Institute                                    |
| 326 | <i>Didymella lethalis</i>                        | Dothideo | Asco | 15 | 38 | 18 | 16 | 87 | GCA_004335245.1 | Curtin University                                             |
| 327 | <i>Fusarium euwallaceae</i>                      | Sordario | Asco | 15 | 37 | 18 | 17 | 87 | GCA_003957675.1 | University of California, Riverside                           |

|     |                                      |          |      |    |    |    |    |    |                 |                                                                                     |
|-----|--------------------------------------|----------|------|----|----|----|----|----|-----------------|-------------------------------------------------------------------------------------|
| 328 | <i>Nectria sp. B-13</i>              | Sordario | Asco | 16 | 40 | 17 | 14 | 87 | GCA_002682825.1 | Anhui University                                                                    |
| 329 | <i>Aspergillus minisclerotigenes</i> | Eurotio  | Asco | 16 | 38 | 16 | 17 | 87 | GCA_009176455.1 | DOE Joint Genome Institute                                                          |
| 330 | <i>Fusarium sambucinum</i>           | Sordario | Asco | 14 | 38 | 19 | 16 | 87 | GCA_001567575.1 | Central Potato Research Institute                                                   |
| 331 | <i>Fusarium sp. NRRL 62944</i>       | Sordario | Asco | 13 | 39 | 19 | 16 | 87 | GCA_013186395.1 | US Department of Agriculture, Agriculture Research Service                          |
| 332 | <i>Fusarium sp. AF-4</i>             | Sordario | Asco | 15 | 38 | 18 | 16 | 87 | GCA_003946995.1 | University of California, Riverside                                                 |
| 333 | <i>Colletotrichum falcatum</i>       | Sordario | Asco | 16 | 34 | 20 | 17 | 87 | GCA_001484525.1 | ICAR-Sugarcane Breeding Institute                                                   |
| 334 | <i>Diplodia seriata</i>              | Dothideo | Asco | 14 | 39 | 17 | 17 | 87 | GCA_001975905.1 | INRA                                                                                |
| 335 | <i>Pseudocercospora fijiensis</i>    | Dothideo | Asco | 16 | 37 | 16 | 18 | 87 | GCA_011057605.1 | Instituto de Investigacion Lightbourn                                               |
| 336 | <i>Hymenoscyphus laetus</i>          | Leotio   | Asco | 16 | 31 | 23 | 17 | 87 | GCA_001414375.1 | University of Exeter                                                                |
| 337 | <i>Curvularia kusanoi</i>            | Dothideo | Asco | 17 | 35 | 20 | 15 | 87 | GCA_011058905.1 | University of Campinas                                                              |
| 338 | <i>Coniothyrium glycines</i>         | Dothideo | Asco | 17 | 35 | 20 | 15 | 87 | GCA_004523985.2 | Oklahoma State University                                                           |
| 339 | <i>Sclerotiophoma versabilis</i>     | Dothideo | Asco | 15 | 37 | 19 | 16 | 87 | GCA_012274445.1 | Fujian Agriculture and Forestry University                                          |
| 340 | <i>Hymenoscyphus occultus</i>        | Leotio   | Asco | 15 | 38 | 16 | 18 | 87 | GCA_900536445.1 | UNIVERSITY OF COPENHAGEN, DEPARTMENT OF GEOSCIENCES AND NATURAL RESOURCE MANAGEMENT |
| 341 | <i>Hymenoscyphus koreanus</i>        | Leotio   | Asco | 15 | 38 | 16 | 18 | 87 | GCA_902652825.1 | UNIVERSITY OF COPENHAGEN, DEPARTMENT OF GEOSCIENCES AND NATURAL RESOURCE MANAGEMENT |
| 342 | <i>Alternaria brassicae</i>          | Dothideo | Asco | 15 | 34 | 22 | 16 | 87 | GCA_004936725.1 | University of Delhi South Campus                                                    |
| 343 | <i>Pyrenochaeta sp. UM 256</i>       | Dothideo | Asco | 15 | 37 | 21 | 14 | 87 | GCA_000359685.2 | UNIVERSITY OF MALAYA                                                                |
| 344 | <i>Aspergillus ochraceus</i>         | Eurotio  | Asco | 14 | 40 | 19 | 14 | 87 | GCA_005784425.1 | Shanghai Institute of Technology                                                    |
| 345 | <i>Cladosporium phlei</i>            | Dothideo | Asco | 16 | 35 | 19 | 17 | 87 | GCA_003614995.1 | National Institute of Agricultural Science                                          |
| 346 | <i>Fusarium nanum</i>                | Sordario | Asco | 15 | 35 | 22 | 15 | 87 | GCA_004367095.1 | US Department of Agriculture, Agriculture Research Service                          |

|     |                                        |          |         |    |    |    |    |    |                 |                                                                                       |
|-----|----------------------------------------|----------|---------|----|----|----|----|----|-----------------|---------------------------------------------------------------------------------------|
| 347 | <i>Tubaria furfuracea</i>              | Agarico  | Basidio | 15 | 41 | 21 | 9  | 86 | GCA_900069095.1 | Royal Botanic Gardens,<br>Kew                                                         |
| 348 | <i>Oidiodendron maius</i>              | Leotio   | Asco    | 11 | 41 | 22 | 12 | 86 | GCA_000827325.1 | JGI                                                                                   |
| 349 | <i>Coniochaeta sp. 2T2.1</i>           | Sordario | Asco    | 15 | 36 | 22 | 13 | 86 | GCA_009194965.1 | DOE Joint Genome<br>Institute                                                         |
| 350 | <i>Penicillium janthinellum</i>        | Eurotio  | Asco    | 14 | 37 | 22 | 13 | 86 | GCA_002369805.1 | CSIR-NIIST                                                                            |
| 351 | <i>Fusarium nematophilum</i>           | Sordario | Asco    | 13 | 40 | 19 | 14 | 86 | GCA_013623595.1 | US Department of<br>Agriculture, Agriculture<br>Research Service                      |
| 352 | <i>Xylaria polymorpha</i>              | Sordario | Asco    | 16 | 35 | 20 | 15 | 86 | GCA_003426235.1 | IHI Zittau / TU Dresden                                                               |
| 353 | <i>Pseudogymnoascus sp. VKM F-3808</i> | Leotio   | Asco    | 13 | 38 | 23 | 12 | 86 | GCA_000750675.1 | Moscow State University                                                               |
| 354 | <i>Paraphaeosphaeria minitans</i>      | Dothideo | Asco    | 14 | 35 | 22 | 15 | 86 | GCA_009707825.1 | State Key Laboratory of<br>Agriculture Microbiology                                   |
| 355 | <i>Pseudogymnoascus sp. WSF 3629</i>   | Leotio   | Asco    | 14 | 41 | 20 | 11 | 86 | GCA_001662585.1 | US Forest Service                                                                     |
| 356 | <i>Monosporascus sp. GIB2</i>          | Sordario | Asco    | 16 | 35 | 20 | 15 | 86 | GCA_004155935.1 | University of New<br>Mexico                                                           |
| 357 | <i>Lentithecium fluviatile</i>         | Dothideo | Asco    | 16 | 33 | 20 | 17 | 86 | GCA_010405425.1 | DOE Joint Genome<br>Institute                                                         |
| 358 | <i>Monosporascus cannonballus</i>      | Sordario | Asco    | 15 | 36 | 20 | 15 | 86 | GCA_004155895.1 | University of New<br>Mexico                                                           |
| 359 | <i>Aspergillus lentulus</i>            | Eurotio  | Asco    | 14 | 38 | 20 | 14 | 86 | GCA_010724575.1 | Medical Mycology<br>Research Center                                                   |
| 360 | <i>Aspergillus arachidicola</i>        | Eurotio  | Asco    | 16 | 37 | 16 | 17 | 86 | GCA_009193545.1 | DOE Joint Genome<br>Institute                                                         |
| 361 | <i>Endocalyx cinctus</i>               | 0        | Asco    | 15 | 33 | 22 | 16 | 86 | GCA_001600455.1 | RIKEN Center for Life<br>Science Technologies,<br>Division of Genomic<br>Technologies |
| 362 | <i>Aspergillus sp. ATCC 12892</i>      | Eurotio  | Asco    | 16 | 38 | 16 | 16 | 86 | GCA_002894705.1 | Pacific Northwest<br>National Lab                                                     |
| 363 | <i>Fusarium torulosum</i>              | Sordario | Asco    | 14 | 37 | 20 | 15 | 86 | GCA_013623875.1 | US Department of<br>Agriculture, Agriculture<br>Research Service                      |
| 364 | <i>Fusarium hostae</i>                 | Sordario | Asco    | 13 | 39 | 20 | 14 | 86 | GCA_002234235.1 | University of Amsterdam                                                               |
| 365 | <i>Verticillium nonalfalfae</i>        | Sordario | Asco    | 17 | 36 | 17 | 16 | 86 | GCA_002776445.1 | University of Ljubljana,<br>Biotechnical faculty                                      |
| 366 | <i>Neonectria sp. DH2</i>              | Sordario | Asco    | 16 | 39 | 16 | 15 | 86 | GCA_003934905.1 | Sun Yat-sen University                                                                |
| 367 | <i>Aspergillus novoparasiticus</i>     | Eurotio  | Asco    | 16 | 38 | 16 | 16 | 86 | GCA_009176405.1 | DOE Joint Genome<br>Institute                                                         |
| 368 | <i>Fusarium armeniacum</i>             | Sordario | Asco    | 14 | 35 | 21 | 16 | 86 | GCA_013618295.1 | US Department of<br>Agriculture, Agriculture<br>Research Service                      |

|     |                                  |          |      |    |    |    |    |    |                 |                                                                           |
|-----|----------------------------------|----------|------|----|----|----|----|----|-----------------|---------------------------------------------------------------------------|
| 369 | <i>Fusarium sp. NRRL 53497</i>   | Sordario | Asco | 14 | 38 | 18 | 16 | 86 | GCA_013184445.1 | US Department of Agriculture, Agriculture Research Service                |
| 370 | <i>Claviceps monteithiana</i>    | Leotio   | Asco | 14 | 35 | 21 | 16 | 86 | GCA_002242835.1 | Rutgers University                                                        |
| 371 | <i>Aspergillus tamarii</i>       | Eurotio  | Asco | 16 | 39 | 17 | 14 | 86 | GCA_009193485.1 | DOE Joint Genome Institute                                                |
| 372 | <i>Aspergillus sojae</i>         | Eurotio  | Asco | 16 | 39 | 15 | 16 | 86 | GCA_009687765.1 | Tokyo Institute of Technology                                             |
| 373 | <i>Bipolaris victoriae</i>       | Dothideo | Asco | 16 | 33 | 20 | 17 | 86 | GCA_000527765.1 | JGI                                                                       |
| 374 | <i>Fusarium sporotrichioides</i> | Sordario | Asco | 14 | 37 | 20 | 15 | 86 | GCA_003012315.1 | Robert Proctor's shared submissions                                       |
| 375 | <i>Fusarium transvaalense</i>    | Sordario | Asco | 16 | 34 | 19 | 17 | 86 | GCA_013623685.1 | US Department of Agriculture, Agriculture Research Service                |
| 376 | <i>Fusarium sp. NRRL 62941</i>   | Sordario | Asco | 13 | 38 | 19 | 16 | 86 | GCA_012978555.1 | US Department of Agriculture, Agriculture Research Service                |
| 377 | <i>Hymenoscyphus fraxineus</i>   | Leotio   | Asco | 15 | 36 | 17 | 18 | 86 | GCA_001414365.1 | University of Exeter                                                      |
| 378 | <i>Rhytidhysteron rufulum</i>    | Dothideo | Asco | 15 | 36 | 19 | 16 | 86 | GCA_000467735.1 | Assembling the Fungal Tree of Life (AFTOL)                                |
| 379 | <i>Calonectria crousiana</i>     | Sordario | Asco | 13 | 38 | 22 | 13 | 86 | GCA_013406985.1 | FABI                                                                      |
| 380 | <i>Fusarium compactum</i>        | Sordario | Asco | 15 | 34 | 20 | 17 | 86 | GCA_013618385.1 | US Department of Agriculture, Agriculture Research Service                |
| 381 | <i>Fusarium sp. AF-8</i>         | Sordario | Asco | 15 | 36 | 18 | 17 | 86 | GCA_003946985.1 | University of California, Riverside                                       |
| 382 | <i>Lasiodiplodia sp. COLG20</i>  | Dothideo | Asco | 16 | 38 | 14 | 18 | 86 | GCA_009801085.1 | University of Agriculture, Faisalabad Pakistan.                           |
| 383 | <i>Verticillium dahliae</i>      | Sordario | Asco | 17 | 36 | 18 | 15 | 86 | GCA_004798895.1 | Wageningen University and Research                                        |
| 384 | <i>Fusarium camptoceras</i>      | Sordario | Asco | 14 | 36 | 21 | 15 | 86 | GCA_004367475.1 | US Department of Agriculture, Agriculture Research Service                |
| 385 | <i>Fusarium culmorum</i>         | Sordario | Asco | 14 | 36 | 21 | 15 | 86 | GCA_003033665.1 | NIOO-KNAW                                                                 |
| 386 | <i>Fusarium caatingaense</i>     | Sordario | Asco | 15 | 35 | 20 | 16 | 86 | GCA_013624355.1 | US Department of Agriculture, Agriculture Research Service                |
| 387 | <i>Aspergillus leporis</i>       | Eurotio  | Asco | 15 | 39 | 17 | 15 | 86 | GCA_009176345.1 | DOE Joint Genome Institute                                                |
| 388 | <i>Lasiodiplodia gonubiensis</i> | Dothideo | Asco | 15 | 39 | 15 | 17 | 86 | GCA_009829795.1 | University of Pretoria                                                    |
| 389 | <i>Fusarium coffeatum</i>        | Sordario | Asco | 15 | 35 | 21 | 15 | 86 | GCA_003316985.1 | CSIRO                                                                     |
| 390 | <i>Diplodia sapinea</i>          | Dothideo | Asco | 14 | 41 | 15 | 16 | 86 | GCA_000671355.1 | Forestry and Agricultural Biotechnology Institute, University of Pretoria |

|     |                                                 |          |      |    |    |    |    |    |                 |                                                                |
|-----|-------------------------------------------------|----------|------|----|----|----|----|----|-----------------|----------------------------------------------------------------|
| 391 | <i>Fusarium subclunatum</i>                     | Sordario | Asco | 14 | 36 | 19 | 17 | 86 | GCA_013623665.1 | US Department of Agriculture, Agriculture Research Service     |
| 392 | <i>Cucurbitaria berberidis</i>                  | Dothideo | Asco | 14 | 37 | 21 | 14 | 86 | GCA_010015615.1 | DOE Joint Genome Institute                                     |
| 393 | <i>Penicillium subrubescens</i>                 | Eurotio  | Asco | 14 | 35 | 23 | 13 | 85 | GCA_001908125.1 | CBS-KNAW Fungal Biodiversity Centre                            |
| 394 | <i>Pseudogymnoascus sp. 05NY08</i>              | Leotio   | Asco | 12 | 42 | 21 | 10 | 85 | GCA_001662605.1 | Institute of the Royal Netherlands Academy of Arts and Science |
| 395 | <i>Pseudogymnoascus sp. VKM F-4516 (FW-969)</i> | Leotio   | Asco | 13 | 37 | 23 | 12 | 85 | GCA_000750815.1 | US Forest Service                                              |
| 396 | <i>Gamarada debralockiae</i>                    | Leotio   | Asco | 13 | 37 | 22 | 13 | 85 | GCA_002803225.1 | Moscow State University                                        |
| 397 | <i>Aspergillus terreus</i>                      | Eurotio  | Asco | 15 | 34 | 21 | 15 | 85 | GCA_009834425.1 | Macquarie University                                           |
| 398 | <i>Hyaloscypha bicolor</i>                      | Leotio   | Asco | 16 | 35 | 19 | 15 | 85 | GCA_002865645.1 | Nanyang Technological University                               |
| 399 | <i>Xylaria grammica</i>                         | Sordario | Asco | 16 | 35 | 19 | 15 | 85 | GCA_004353285.1 | DOE Joint Genome Institute                                     |
| 400 | <i>Aspergillus aff. floccosus IMV 01167</i>     | Eurotio  | Asco | 15 | 34 | 21 | 15 | 85 | GCA_001931935.1 | National Institute of Biological Resources                     |
| 401 | <i>Fusarium azukicola</i>                       | Sordario | Asco | 15 | 34 | 17 | 19 | 85 | GCA_001680625.1 | Jet Propulsion Laboratory, California Institute of Technology  |
| 402 | <i>Aspergillus pseudotamarii</i>                | Eurotio  | Asco | 16 | 38 | 16 | 15 | 85 | GCA_009193445.1 | Iowa State University                                          |
| 403 | <i>Fusarium neocosmosporiellum</i>              | Sordario | Asco | 14 | 39 | 15 | 17 | 85 | GCA_006518225.1 | DOE Joint Genome Institute                                     |
| 404 | <i>Fusarium cerealis</i>                        | Sordario | Asco | 14 | 35 | 21 | 15 | 85 | GCA_012600195.1 | US Department of Agriculture, Agriculture Research Service     |
| 405 | <i>Verticillium alfalfae</i>                    | Sordario | Asco | 16 | 36 | 17 | 16 | 85 | GCA_002851655.1 | University of Minnesota                                        |
| 406 | <i>Fusarium protoensiforme</i>                  | Sordario | Asco | 14 | 37 | 17 | 17 | 85 | GCA_011320165.1 | Wageningen University & Research                               |
| 407 | <i>Aspergillus latus</i>                        | Eurotio  | Asco | 15 | 39 | 17 | 14 | 85 | GCA_013306195.1 | US Department of Agriculture, Agriculture Research Service     |
| 408 | <i>Fusarium graminearum</i>                     | Sordario | Asco | 13 | 37 | 21 | 14 | 85 | GCA_900044135.1 | Vanderbilt University                                          |
| 409 | <i>Stemphylium lycopersici</i>                  | Dothideo | Asco | 15 | 34 | 20 | 16 | 85 | GCA_003268315.1 | ROTHAMSTED RESEARCH                                            |
| 410 | <i>Calonectria pseudoturagicola</i>             | Sordario | Asco | 13 | 38 | 20 | 14 | 85 | GCA_013403825.1 | Centro de Investigaciones en Fitopatologías (CIDEFI)           |
| 411 | <i>Monosporascus sp. MC13-8B</i>                | Sordario | Asco | 15 | 36 | 19 | 15 | 85 | GCA_004154975.1 | FABI                                                           |
| 412 | <i>Fusarium floridanum</i>                      | Sordario | Asco | 15 | 35 | 18 | 17 | 85 | GCA_003947005.1 | University of New Mexico                                       |
|     |                                                 |          |      |    |    |    |    |    |                 | University of California, Riverside                            |

|     |                                      |          |         |    |    |    |    |    |                 |                                                                                     |
|-----|--------------------------------------|----------|---------|----|----|----|----|----|-----------------|-------------------------------------------------------------------------------------|
| 413 | <i>Aspergillus parasiticus</i>       | Eurotio  | Asco    | 16 | 37 | 15 | 17 | 85 | GCA_013146005.1 | USDA                                                                                |
| 414 | <i>Rutstroemia sp. NJR-2017a BBW</i> | Leotio   | Asco    | 15 | 36 | 19 | 15 | 85 | GCA_002946425.1 | Brigham Young University                                                            |
| 415 | <i>Coleophoma crateriformis</i>      | Leotio   | Asco    | 16 | 36 | 16 | 17 | 85 | GCA_003369635.1 | The University of Texas Health Science Center at Houston                            |
| 416 | <i>Proliferodiscus dingleyae</i>     | Leotio   | Asco    | 14 | 35 | 22 | 14 | 85 | GCA_003988795.1 | Manaaki Whenua Landcare Research                                                    |
| 417 | <i>Aspergillus pseudoterreus</i>     | Eurotio  | Asco    | 15 | 33 | 21 | 16 | 85 | GCA_002927005.1 | Pacific Northwest National Lab                                                      |
| 418 | <i>Aspergillus quadrilineatus</i>    | Eurotio  | Asco    | 15 | 38 | 18 | 14 | 85 | GCA_013305525.1 | Vanderbilt University                                                               |
| 419 | <i>Fusarium solani</i>               | Sordario | Asco    | 15 | 37 | 16 | 17 | 85 | GCA_002215905.1 | National Institute of Biological Resources                                          |
| 420 | <i>Hymenoscyphus linearis</i>        | Leotio   | Asco    | 15 | 37 | 16 | 17 | 85 | GCA_900536425.1 | UNIVERSITY OF COPENHAGEN, DEPARTMENT OF GEOSCIENCES AND NATURAL RESOURCE MANAGEMENT |
| 421 | <i>Fusarium kuroshium</i>            | Sordario | Asco    | 14 | 36 | 18 | 17 | 85 | GCA_003698175.1 | University of California, Riverside                                                 |
| 422 | <i>Fusarium praegraminearum</i>      | Sordario | Asco    | 15 | 35 | 21 | 14 | 85 | GCA_002093855.1 | US Department of Agriculture, Agriculture Research Service                          |
| 423 | <i>Macroventuria anomochaeta</i>     | Dothideo | Asco    | 14 | 38 | 17 | 16 | 85 | GCA_010093625.1 | DOE Joint Genome Institute                                                          |
| 424 | <i>Hymenoscyphus repandus</i>        | Leotio   | Asco    | 15 | 37 | 17 | 16 | 85 | GCA_001414415.1 | University of Exeter                                                                |
| 425 | <i>Fusarium poae</i>                 | Sordario | Asco    | 15 | 33 | 20 | 17 | 85 | GCA_001675295.1 | Wageningen UR                                                                       |
| 426 | <i>Aureobasidium sp. FSWF8-4</i>     | Dothideo | Asco    | 15 | 35 | 19 | 16 | 85 | GCA_001914275.1 | Uppsala University                                                                  |
| 427 | <i>Talaromyces purpureogenus</i>     | Eurotio  | Asco    | 13 | 38 | 22 | 11 | 84 | GCA_001270325.1 | Mathomics                                                                           |
| 428 | <i>Laburnicola sp. JP-R-44</i>       | Dothideo | Asco    | 15 | 36 | 18 | 15 | 84 | GCA_009805535.1 | Chinese Academy of Forestry                                                         |
| 429 | <i>Exidia glandulosa</i>             | Agarico  | Basidio | 16 | 32 | 20 | 16 | 84 | GCA_001632375.1 | DOE Joint Genome Institute                                                          |
| 430 | <i>Bipolaris sorokiniana</i>         | Dothideo | Asco    | 15 | 33 | 20 | 16 | 84 | GCA_004329375.1 | ICAR-Indian Agricultural Research Institute                                         |
| 431 | <i>Aspergillus oryzae</i>            | Eurotio  | Asco    | 16 | 35 | 17 | 16 | 84 | GCA_002007945.1 | Bioprocess Technology Laboratory, BIOTEC, Thailand                                  |
| 432 | <i>Neoscytalidium dimidiatum</i>     | Dothideo | Asco    | 14 | 38 | 15 | 17 | 84 | GCA_900092665.1 | University Malaya                                                                   |
| 433 | <i>Aspergillus hancockii</i>         | Eurotio  | Asco    | 16 | 35 | 15 | 18 | 84 | GCA_001696595.1 | CSIRO                                                                               |
| 434 | <i>Bipolaris maydis</i>              | Dothideo | Asco    | 16 | 31 | 20 | 17 | 84 | GCA_000338975.1 | JGI                                                                                 |
| 435 | <i>Botryosphaeria kuwatsukai</i>     | Dothideo | Asco    | 14 | 37 | 17 | 16 | 84 | GCA_004016305.1 | Northwest A&F University                                                            |

|     |                                     |          |      |    |    |    |    |    |                 |                                                            |
|-----|-------------------------------------|----------|------|----|----|----|----|----|-----------------|------------------------------------------------------------|
| 436 | <i>Fusarium sp. NRRL 6227</i>       | Sordario | Asco | 13 | 35 | 21 | 15 | 84 | GCA_013623825.1 | US Department of Agriculture, Agriculture Research Service |
| 437 | <i>Aspergillus transmontanensis</i> | Eurotio  | Asco | 16 | 37 | 15 | 16 | 84 | GCA_009193505.1 | DOE Joint Genome Institute                                 |
| 438 | <i>Fusarium equiseti</i>            | Sordario | Asco | 14 | 34 | 21 | 15 | 84 | GCA_003313175.1 | Gansu Academy of Agricultural Sciences                     |
| 439 | <i>Fusarium brasilicum</i>          | Sordario | Asco | 13 | 36 | 21 | 14 | 84 | GCA_013184295.1 | US Department of Agriculture, Agriculture Research Service |
| 440 | <i>Aspergillus bombycis</i>         | Eurotio  | Asco | 15 | 37 | 16 | 16 | 84 | GCA_001792695.1 | USDA-ARS-SRRC                                              |
| 441 | <i>Fusarium pseudograminearum</i>   | Sordario | Asco | 14 | 35 | 21 | 14 | 84 | GCA_000303195.2 | CSIRO                                                      |
| 442 | <i>Didymella exigua</i>             | Dothideo | Asco | 15 | 38 | 15 | 16 | 84 | GCA_010094145.1 | DOE Joint Genome Institute                                 |
| 443 | <i>Fusarium scirpi</i>              | Sordario | Asco | 14 | 35 | 20 | 15 | 84 | GCA_004367495.1 | US Department of Agriculture, Agriculture Research Service |
| 444 | <i>Clariireedia jacksonii</i>       | Leotio   | Asco | 14 | 36 | 19 | 15 | 84 | GCA_002242905.1 | Rutgers University                                         |
| 445 | <i>Fusarium longipes</i>            | Sordario | Asco | 15 | 32 | 20 | 17 | 84 | GCA_013618495.1 | US Department of Agriculture, Agriculture Research Service |
| 446 | <i>Parastagonospora avenae</i>      | Dothideo | Asco | 15 | 31 | 22 | 16 | 84 | GCA_003503115.1 | Centre for Crop & Disease Management, Curtin University    |
| 447 | <i>Fusarium humuli</i>              | Sordario | Asco | 14 | 35 | 20 | 15 | 84 | GCA_004366955.1 | US Department of Agriculture, Agriculture Research Service |
| 448 | <i>Clariireedia sp. CPB17</i>       | Leotio   | Asco | 14 | 34 | 20 | 16 | 84 | GCA_002242865.1 | Rutgers University                                         |
| 449 | <i>Fusarium clavum</i>              | Sordario | Asco | 15 | 35 | 19 | 15 | 84 | GCA_004367155.1 | US Department of Agriculture, Agriculture Research Service |
| 450 | <i>Neonectria ditissima</i>         | Sordario | Asco | 15 | 39 | 16 | 14 | 84 | GCA_001305495.1 | The New Zealand Institute for Plant & Food Research Ltd    |
| 451 | <i>Clariireedia sp. SE16F4</i>      | Leotio   | Asco | 14 | 36 | 19 | 15 | 84 | GCA_002242985.1 | Rutgers University                                         |
| 452 | <i>Aquanectria penicillioides</i>   | Sordario | Asco | 14 | 38 | 18 | 14 | 84 | GCA_003415625.1 | Nakdonggang National Institute of Biological Resources     |
| 453 | <i>Neonectria galligena</i>         | Sordario | Asco | 15 | 40 | 16 | 13 | 84 | GCA_013759035.1 | US Department of Agriculture, Agriculture Research Service |
| 454 | <i>Diplodia corticola</i>           | Dothideo | Asco | 15 | 37 | 15 | 17 | 84 | GCA_001883845.1 | University of Aveiro                                       |



|     |                                        |          |      |    |    |    |    |    |                 |                                                             |
|-----|----------------------------------------|----------|------|----|----|----|----|----|-----------------|-------------------------------------------------------------|
| 455 | <i>Fusarium luffae</i>                 | Sordario | Asco | 14 | 34 | 20 | 16 | 84 | GCA_013184325.1 | US Department of Agriculture, Agriculture Research Service  |
| 456 | <i>Fusarium langsethiae</i>            | Sordario | Asco | 14 | 34 | 20 | 16 | 84 | GCA_001292635.1 | Bioforsk                                                    |
| 457 | <i>Aspergillus westerdijkiae</i>       | Eurotio  | Asco | 13 | 39 | 18 | 14 | 84 | GCA_001307345.1 | Nanyang Technological University                            |
| 458 | <i>Alternaria brassicicola</i>         | Dothideo | Asco | 15 | 32 | 21 | 16 | 84 | GCA_002796735.1 | IRHS                                                        |
| 459 | <i>Elsinoe arachidis</i>               | Dothideo | Asco | 14 | 34 | 20 | 16 | 84 | GCA_013372555.1 | Shenyang Agricultural University                            |
| 460 | <i>Aureobasidium namibiae</i>          | Dothideo | Asco | 16 | 32 | 20 | 16 | 84 | GCA_000721765.1 | DOE Joint Genome Institute                                  |
| 461 | <i>fungal sp. No.14919</i>             | 0        | 0    | 15 | 34 | 20 | 14 | 83 | GCA_002003505.1 | Tsukuba Biotechnology Research Center, Astellas Pharma Inc. |
| 462 | <i>Pseudogymnoascus sp. 23342-1-11</i> | Leotio   | Asco | 14 | 38 | 20 | 11 | 83 | GCA_001662575.1 | US Forest Service                                           |
| 463 | <i>Juglanconis sp. DMW523</i>          | Sordario | Asco | 14 | 37 | 16 | 16 | 83 | GCA_003013055.1 | USDA-ARS                                                    |
| 464 | <i>Arthrinium phaeospermum</i>         | Sordario | Asco | 16 | 32 | 20 | 15 | 83 | GCA_006503535.1 | Sichuan Agricultural University                             |
| 465 | <i>Aspergillus pseudocaelatus</i>      | Eurotio  | Asco | 15 | 38 | 16 | 14 | 83 | GCA_009193665.1 | DOE Joint Genome Institute                                  |
| 466 | <i>Colletotrichum lentis</i>           | Sordario | Asco | 14 | 38 | 16 | 15 | 83 | GCA_003386485.1 | University of Saskatchewan                                  |
| 467 | <i>Curvularia geniculata</i>           | Dothideo | Asco | 16 | 32 | 19 | 16 | 83 | GCA_002982235.1 | Universidade Federal de Mato Grosso                         |
| 468 | <i>Curvularia lunata</i>               | Dothideo | Asco | 16 | 32 | 19 | 16 | 83 | GCA_005212705.1 | Universidade Federal de Mato Grosso                         |
| 469 | <i>Aspergillus thermomutatus</i>       | Eurotio  | Asco | 15 | 36 | 18 | 14 | 83 | GCA_002237265.2 | University of Montreal                                      |
| 470 | <i>Fusarium meridionale</i>            | Sordario | Asco | 13 | 36 | 20 | 14 | 83 | GCA_009617515.1 | University of Sao Paulo                                     |
| 471 | <i>Aspergillus felis</i>               | Eurotio  | Asco | 14 | 36 | 19 | 14 | 83 | GCA_014281915.1 | UNICAMP                                                     |
| 472 | <i>Aspergillus nomiae</i>              | Eurotio  | Asco | 15 | 36 | 17 | 15 | 83 | GCA_001204775.2 | USDA-ARS-SRRC                                               |
| 473 | <i>Fusarium austroamericanum</i>       | Sordario | Asco | 13 | 36 | 20 | 14 | 83 | GCA_009617525.1 | University of Sao Paulo                                     |
| 474 | <i>Glarea lozoyensis</i>               | Leotio   | Asco | 17 | 32 | 18 | 16 | 83 | GCA_000409485.1 | Institute Of Microbiology, Chinese Academy of Sciences      |
| 475 | <i>Xylaria sp. JS573</i>               | Sordario | Asco | 15 | 33 | 20 | 15 | 83 | GCA_000966885.1 | Seoul National University                                   |
| 476 | <i>Fusarium irregulare</i>             | Sordario | Asco | 14 | 33 | 21 | 15 | 83 | GCA_004367085.1 | US Department of Agriculture, Agriculture Research Service  |
| 477 | <i>Fusarium hainanense</i>             | Sordario | Asco | 15 | 33 | 20 | 15 | 83 | GCA_013618405.1 | US Department of Agriculture, Agriculture Research Service  |
| 478 | <i>Amniculicola lignicola</i>          | Dothideo | Asco | 16 | 31 | 19 | 17 | 83 | GCA_010015725.1 | DOE Joint Genome Institute                                  |
| 479 | <i>Clariireedia homoeocarpa</i>        | Leotio   | Asco | 14 | 35 | 19 | 15 | 83 | GCA_001465935.1 | UMass Amherst                                               |

|     |                                    |          |      |    |    |    |    |    |                 |                                                                                 |
|-----|------------------------------------|----------|------|----|----|----|----|----|-----------------|---------------------------------------------------------------------------------|
| 480 | <i>Aspergillus nidulans</i>        | Eurotio  | Asco | 15 | 36 | 18 | 14 | 83 | GCA_011074995.1 | Barcelona<br>Supercomputing center<br>(BSC)                                     |
| 481 | <i>Phoma sp. RAV-16-625</i>        | Dothideo | Asco | 15 | 35 | 18 | 15 | 83 | GCA_004335185.1 | Curtin University                                                               |
| 482 | <i>Fusarium brasiliense</i>        | Sordario | Asco | 14 | 35 | 16 | 18 | 83 | GCA_001680685.1 | Iowa State University                                                           |
| 483 | <i>Fusarium tanahbumbuense</i>     | Sordario | Asco | 13 | 35 | 21 | 14 | 83 | GCA_012977735.1 | US Department of<br>Agriculture, Agriculture<br>Research Service                |
| 484 | <i>Aspergillus mulundensis</i>     | Eurotio  | Asco | 14 | 40 | 17 | 12 | 83 | GCA_003369625.1 | The University of Texas<br>Health Science Center at<br>Houston                  |
| 485 | <i>Fusarium subtropicale</i>       | Sordario | Asco | 14 | 35 | 20 | 14 | 83 | GCA_003670145.1 | US Department of<br>Agriculture, Agriculture<br>Research Service                |
| 486 | <i>Rhynchosporium secalis</i>      | Leotio   | Asco | 15 | 30 | 21 | 17 | 83 | GCA_900074895.1 | Technische Universitat<br>Munchen - WZW                                         |
| 487 | <i>Elsinoe fawcettii</i>           | Dothideo | Asco | 14 | 35 | 18 | 16 | 83 | GCA_012977835.1 | University of Southern<br>Queensland                                            |
| 488 | <i>Rhynchosporium commune</i>      | Leotio   | Asco | 15 | 30 | 21 | 17 | 83 | GCA_900074885.1 | Technische Universitat<br>Munchen - WZW                                         |
| 489 | <i>Amphirosellinia nigrospora</i>  | Sordario | Asco | 15 | 33 | 19 | 15 | 82 | GCA_004123355.1 | National Institute of<br>Biological Resources                                   |
| 490 | <i>Pseudohalonectria lignicola</i> | Sordario | Asco | 14 | 33 | 22 | 13 | 82 | GCA_003049395.1 | Agricultural Research<br>Service, United States<br>Department of<br>Agriculture |
| 491 | <i>Monosporascus ibericus</i>      | Sordario | Asco | 14 | 34 | 20 | 14 | 82 | GCA_004154915.1 | University of New<br>Mexico                                                     |
| 492 | <i>Hortaea werneckii</i>           | Dothideo | Asco | 14 | 36 | 21 | 11 | 82 | GCA_002127715.1 | University of California,<br>Riverside                                          |
| 493 | <i>Aspergillus novofumigatus</i>   | Eurotio  | Asco | 13 | 39 | 18 | 12 | 82 | GCA_002847465.1 | DOE Joint Genome<br>Institute                                                   |
| 494 | <i>Gaeumannomyces tritici</i>      | Sordario | Asco | 17 | 29 | 19 | 17 | 82 | GCA_000145635.1 | Broad Institute                                                                 |
| 495 | <i>Nakataea oryzae</i>             | Sordario | Asco | 16 | 27 | 22 | 17 | 82 | GCA_003049435.1 | Agricultural Research<br>Service, United States<br>Department of<br>Agriculture |
| 496 | <i>Fusarium asiaticum</i>          | Sordario | Asco | 13 | 34 | 21 | 14 | 82 | GCA_001717845.1 | Government of Canada                                                            |
| 497 | <i>Fusarium cortaderiae</i>        | Sordario | Asco | 13 | 36 | 19 | 14 | 82 | GCA_009617495.1 | University of Sao Paulo                                                         |
| 498 | <i>Botryosphaeria dothidea</i>     | Dothideo | Asco | 14 | 37 | 15 | 16 | 82 | GCA_011503125.2 | Shandong Agricultural<br>University                                             |
| 499 | <i>Shiraia sp. slf14</i>           | Dothideo | Asco | 15 | 32 | 21 | 14 | 82 | GCA_000498155.1 | Jiangxi Normal University                                                       |
| 500 | <i>Ascochyta lentis</i>            | Dothideo | Asco | 15 | 35 | 16 | 16 | 82 | GCA_004011705.1 | Curtin University                                                               |
| 501 | <i>Ascochyta rabiei</i>            | Dothideo | Asco | 14 | 37 | 16 | 15 | 82 | GCA_004011695.1 | Curtin University                                                               |

|     |                                       |          |         |    |    |    |    |    |                 |                                                                                                                                                   |
|-----|---------------------------------------|----------|---------|----|----|----|----|----|-----------------|---------------------------------------------------------------------------------------------------------------------------------------------------|
| 502 | <i>Rutstroemia sp. NJR-2017a WRK4</i> | Leotio   | Asco    | 14 | 35 | 19 | 14 | 82 | GCA_002946385.1 | Brigham Young University                                                                                                                          |
| 503 | <i>Ascochyta viciae-villosae</i>      | Dothideo | Asco    | 15 | 35 | 16 | 16 | 82 | GCA_004335205.1 | Curtin University                                                                                                                                 |
| 504 | <i>Fusarium virguliforme</i>          | Sordario | Asco    | 15 | 33 | 16 | 18 | 82 | GCA_013363175.1 | US Department of Agriculture, Agriculture Research Service                                                                                        |
| 505 | <i>Fusarium zanthoxyl</i>             | Sordario | Asco    | 13 | 36 | 17 | 16 | 82 | GCA_013623745.1 | US Department of Agriculture, Agriculture Research Service                                                                                        |
| 506 | <i>Dactylellina cionopaga</i>         | Orbilio  | Asco    | 13 | 36 | 19 | 14 | 82 | GCA_012184355.1 | Laboratory for Conservation and Utilization of Bio-Resources and Key Laboratory for Microbial Diversity in Southwest China, Ministry of Education |
| 507 | <i>Sarocladium oryzae</i>             | Sordario | Asco    | 14 | 31 | 22 | 15 | 82 | GCA_001972265.1 | RIKEN Center for Life Science Technologies, Division of Genomic Technologies                                                                      |
| 508 | <i>Elsinoe ampelina</i>               | Dothideo | Asco    | 14 | 32 | 20 | 16 | 82 | GCA_005959805.1 | Northwest A&F University                                                                                                                          |
| 509 | <i>Didymobotryum rigidum</i>          | Sordario | Asco    | 15 | 31 | 20 | 15 | 81 | GCA_001600575.1 | RIKEN Center for Life Science Technologies, Division of Genomic Technologies                                                                      |
| 510 | <i>Penicillium sp. MT2 MMC-2018</i>   | Eurotio  | Asco    | 13 | 35 | 22 | 11 | 81 | GCA_003852855.1 | Florida A&M University                                                                                                                            |
| 511 | <i>Microdochium bolleyi</i>           | Sordario | Asco    | 15 | 33 | 18 | 15 | 81 | GCA_001566295.1 | DOE Joint Genome Institute                                                                                                                        |
| 512 | <i>Lindgomyces ingoldianus</i>        | Dothideo | Asco    | 15 | 30 | 21 | 15 | 81 | GCA_010093535.1 | DOE Joint Genome Institute                                                                                                                        |
| 513 | <i>Aspergillus caelatus</i>           | Eurotio  | Asco    | 14 | 37 | 16 | 14 | 81 | GCA_009193585.1 | DOE Joint Genome Institute                                                                                                                        |
| 514 | <i>Aspergillus alliaceus</i>          | Eurotio  | Asco    | 15 | 35 | 15 | 16 | 81 | GCA_009176365.1 | DOE Joint Genome Institute                                                                                                                        |
| 515 | <i>Chrysosporthe deuterocubensis</i>  | Sordario | Asco    | 13 | 37 | 17 | 14 | 81 | GCA_001513825.1 | Forestry and Agricultural Biotechnology Institute (FABI), University of Pretoria                                                                  |
| 516 | <i>Auricularia cornea</i>             | Agarico  | Basidio | 17 | 25 | 20 | 19 | 81 | GCA_008368385.1 | Jilin Agricultural University                                                                                                                     |
| 517 | <i>Curvularia papendorffii</i>        | Dothideo | Asco    | 15 | 31 | 19 | 16 | 81 | GCA_000817285.1 | UNIVERSITY OF MALAYA                                                                                                                              |
| 518 | <i>Aspergillus viridinutans</i>       | Eurotio  | Asco    | 13 | 36 | 18 | 14 | 81 | GCA_004368095.1 | University of Melbourne                                                                                                                           |

|     |                                     |          |      |    |    |    |    |    |                 |                                                                                                                                                                        |
|-----|-------------------------------------|----------|------|----|----|----|----|----|-----------------|------------------------------------------------------------------------------------------------------------------------------------------------------------------------|
| 519 | <i>Chrysosporthe austroafricana</i> | Sordario | Asco | 13 | 37 | 17 | 14 | 81 | GCA_001051155.1 | Forestry and Agricultural<br>Biotechnology Institute<br>(FABI), University of<br>Pretoria                                                                              |
| 520 | <i>Xylaria hypoxylon</i>            | Sordario | Asco | 17 | 32 | 18 | 14 | 81 | GCA_902806585.1 | CEBITEC                                                                                                                                                                |
| 521 | <i>Ophioceras dolichostomum</i>     | Sordario | Asco | 16 | 29 | 21 | 15 | 81 | GCA_003049485.1 | Agricultural Research<br>Service, United States<br>Department of<br>Agriculture                                                                                        |
| 522 | <i>Ascochyta viciae</i>             | Dothideo | Asco | 14 | 35 | 16 | 16 | 81 | GCA_004335155.1 | Curtin University                                                                                                                                                      |
| 523 | <i>Ascochyta fabae</i>              | Dothideo | Asco | 14 | 35 | 16 | 16 | 81 | GCA_004335285.1 | Curtin University                                                                                                                                                      |
| 524 | <i>Fusarium sp. AF-6</i>            | Sordario | Asco | 15 | 33 | 15 | 18 | 81 | GCA_003947015.1 | University of California,<br>Riverside                                                                                                                                 |
| 525 | <i>Fusarium heterosporum</i>        | Sordario | Asco | 16 | 31 | 18 | 16 | 81 | GCA_013396295.1 | US Department of<br>Agriculture, Agriculture<br>Research Service                                                                                                       |
| 526 | <i>Fusarium kyushuense</i>          | Sordario | Asco | 14 | 33 | 18 | 16 | 81 | GCA_013184315.1 | US Department of<br>Agriculture, Agriculture<br>Research Service                                                                                                       |
| 527 | <i>Leptosphaeria maculans</i>       | Dothideo | Asco | 16 | 31 | 20 | 14 | 81 | GCA_900465115.1 | GSC                                                                                                                                                                    |
| 528 | <i>Pseudocercospora macadamiae</i>  | Dothideo | Asco | 13 | 35 | 15 | 17 | 80 | GCA_012978405.1 | University of Queensland                                                                                                                                               |
| 529 | <i>Magnaporthales sp. P1609</i>     | Sordario | Asco | 17 | 28 | 21 | 14 | 80 | GCA_003709005.1 | Fujian Agriculture and<br>Forestry University                                                                                                                          |
| 530 | <i>Magnaporthe sp. MG07</i>         | Sordario | Asco | 16 | 27 | 21 | 16 | 80 | GCA_001936455.1 | Centre for Cellular and<br>Molecular Platforms                                                                                                                         |
| 531 | <i>Penicillium capsulatum</i>       | Eurotio  | Asco | 14 | 34 | 17 | 15 | 80 | GCA_000943775.1 | Shanghai Key Laboratory<br>of Molecular Medical<br>Mycology, Department<br>of Dermatology,<br>Shanghai Changzheng<br>Hospital; Academy of<br>Military Medical Sciences |
| 532 | <i>Juglanconis oblonga</i>          | Sordario | Asco | 14 | 35 | 16 | 15 | 80 | GCA_003012965.1 | USDA-ARS                                                                                                                                                               |
| 533 | <i>Magnaporthiopsis rhizophila</i>  | Sordario | Asco | 15 | 30 | 20 | 15 | 80 | GCA_003049465.1 | Agricultural Research<br>Service, United States<br>Department of<br>Agriculture                                                                                        |
| 534 | <i>Magnaporthiopsis incrustans</i>  | Sordario | Asco | 14 | 30 | 20 | 16 | 80 | GCA_003049425.1 | Agricultural Research<br>Service, United States<br>Department of<br>Agriculture                                                                                        |
| 535 | <i>Aspergillus fischeri</i>         | Eurotio  | Asco | 12 | 37 | 17 | 14 | 80 | GCA_008711165.1 | UMass Amherst                                                                                                                                                          |
| 536 | <i>Aspergillus sp. CLMG-2019a</i>   | Eurotio  | Asco | 15 | 34 | 15 | 16 | 80 | GCA_013421405.1 | The University of<br>Western Australia                                                                                                                                 |

|     |                                    |          |      |    |    |    |    |    |                 |                                                                                                        |
|-----|------------------------------------|----------|------|----|----|----|----|----|-----------------|--------------------------------------------------------------------------------------------------------|
| 537 | <i>Cryphonectria macrospora</i>    | Sordario | Asco | 13 | 36 | 18 | 13 | 80 | GCA_004802535.1 | USDA-ARS                                                                                               |
| 538 | <i>Cryphonectria nitschkei</i>     | Sordario | Asco | 13 | 36 | 18 | 13 | 80 | GCA_006503525.1 | USDA                                                                                                   |
| 539 | <i>Juglanconis juglandina</i>      | Sordario | Asco | 14 | 35 | 16 | 15 | 80 | GCA_003012975.1 | USDA-ARS                                                                                               |
| 540 | <i>Chrysosporthe cubensis</i>      | Sordario | Asco | 13 | 36 | 17 | 14 | 80 | GCA_004802525.1 | USDA-ARS                                                                                               |
| 541 | <i>Annulohyphoxylon stygium</i>    | Sordario | Asco | 15 | 29 | 20 | 16 | 80 | GCA_003314315.1 | Kunming University of<br>Science and Technology                                                        |
| 542 | <i>Epicoccum nigrum</i>            | Dothideo | Asco | 16 | 31 | 18 | 15 | 80 | GCA_002116315.1 | The University of<br>Auckland                                                                          |
| 543 | <i>Hypomontagnella monticulosa</i> | Sordario | Asco | 15 | 29 | 21 | 15 | 80 | GCA_902825475.1 | CEBITEC                                                                                                |
| 544 | <i>Aspergillus unguis</i>          | Eurotio  | Asco | 16 | 34 | 16 | 14 | 80 | GCA_003324175.1 | CSIR-NIIST                                                                                             |
| 545 | <i>Sarocladium strictum</i>        | Sordario | Asco | 15 | 29 | 21 | 15 | 80 | GCA_900290465.1 | CEBITEC                                                                                                |
| 546 | <i>Fusarium tucumaniae</i>         | Sordario | Asco | 14 | 33 | 16 | 17 | 80 | GCA_001680535.1 | Iowa State University<br>Forestry & Agricultural<br>Biotechnology Institute,<br>University of Pretoria |
| 547 | <i>Diplodia scrobiculata</i>       | Dothideo | Asco | 14 | 36 | 13 | 17 | 80 | GCA_001455585.1 | Agribio-Center for<br>Agribioscience                                                                   |
| 548 | <i>Spermospora avenae</i>          | 0        | Asco | 15 | 30 | 20 | 15 | 80 | GCA_014282315.1 | Environment and Plant<br>Protection Institute                                                          |
| 549 | <i>Sarocladium brachiariae</i>     | Sordario | Asco | 15 | 30 | 20 | 15 | 80 | GCA_008271525.1 | ARS                                                                                                    |
| 550 | <i>Helotiales sp. DMI_Dod_Qol</i>  | Leotio   | Asco | 14 | 31 | 20 | 15 | 80 | GCA_009613015.1 | US Department of<br>Agriculture, Agriculture<br>Research Service                                       |
| 551 | <i>Fusarium nurragi</i>            | Sordario | Asco | 14 | 31 | 19 | 16 | 80 | GCA_012977755.1 | Vanderbilt University                                                                                  |
| 552 | <i>Aspergillus spinulosporus</i>   | Eurotio  | Asco | 14 | 37 | 17 | 12 | 80 | GCA_013305485.1 | US Department of<br>Agriculture, Agriculture<br>Research Service                                       |
| 553 | <i>Fusarium sp. KOD 1611</i>       | Sordario | Asco | 12 | 35 | 21 | 12 | 80 | GCA_013624395.1 | US Department of<br>Agriculture, Agriculture<br>Research Service                                       |
| 554 | <i>Fusarium xyrophilum</i>         | Sordario | Asco | 12 | 35 | 21 | 12 | 80 | GCA_008711595.1 | US Department of<br>Agriculture, Agriculture<br>Research Service                                       |
| 555 | <i>Rhynchosporium agropyri</i>     | Leotio   | Asco | 14 | 30 | 20 | 16 | 80 | GCA_900074905.1 | Technische Universitat<br>Munchen - WZW                                                                |
| 556 | <i>Cladosporium sp. TM138-S3</i>   | Dothideo | Asco | 14 | 35 | 18 | 13 | 80 | GCA_011745625.1 | Hellenic Centre of<br>Marine Research (HCMR)                                                           |
| 557 | <i>Neobulgaria alba</i>            | Leotio   | Asco | 13 | 38 | 18 | 11 | 80 | GCA_003988965.1 | Manaaki Whenua<br>Landcare Research                                                                    |
| 558 | <i>Cytospora leucostoma</i>        | Sordario | Asco | 13 | 36 | 17 | 14 | 80 | GCA_003795295.1 | Northwest A&F<br>University                                                                            |
| 559 | <i>Aureobasidium sp. P6</i>        | Dothideo | Asco | 15 | 32 | 19 | 14 | 80 | GCA_003992365.1 | Ocean University of<br>China                                                                           |
| 560 | <i>Elsinoe australis</i>           | Dothideo | Asco | 14 | 33 | 18 | 15 | 80 | GCA_003013795.1 | Nanjing Forestry<br>University                                                                         |
| 561 | <i>Gaeumannomyces sp. JS-464</i>   | Sordario | Asco | 16 | 27 | 20 | 16 | 79 | GCA_002197995.1 | National Institute of<br>Biological Resources                                                          |

|     |                                     |          |         |    |    |    |    |    |                  |                                                            |
|-----|-------------------------------------|----------|---------|----|----|----|----|----|------------------|------------------------------------------------------------|
| 562 | <i>Pseudogymnoascus sp. 03VT05</i>  | Leotio   | Asco    | 11 | 38 | 21 | 9  | 79 | GCA_001662645.1  | US Forest Service                                          |
| 563 | <i>Aspergillus pseudonomius</i>     | Eurotio  | Asco    | 14 | 35 | 16 | 14 | 79 | GCA_009176395.1  | DOE Joint Genome Institute                                 |
| 564 | <i>Cryphonectria radicalis</i>      | Sordario | Asco    | 12 | 37 | 17 | 13 | 79 | GCA_003054855.1  | USDA-ARS                                                   |
| 565 | <i>Aspergillus bertholletiae</i>    | Eurotio  | Asco    | 13 | 37 | 15 | 14 | 79 | GCA_009193595.1  | DOE Joint Genome Institute                                 |
| 566 | <i>Aspergillus hiratsukae</i>       | Eurotio  | Asco    | 14 | 34 | 17 | 14 | 79 | GCA_014281905.1  | UNICAMP                                                    |
| 567 | <i>Curvularia sp. IFB-Z10</i>       | Dothideo | Asco    | 15 | 27 | 20 | 17 | 79 | GCA_002161795.1  | Nanjing University                                         |
| 568 | <i>Cryphonectria parasitica</i>     | Sordario | Asco    | 12 | 37 | 17 | 13 | 79 | GCA_0111745365.1 | DOE Joint Genome Institute                                 |
| 569 | <i>Auricularia subglabra</i>        | Agarico  | Basidio | 16 | 23 | 21 | 19 | 79 | GCA_000265015.1  | JGI                                                        |
| 570 | <i>Lizonia empirigonia</i>          | Dothideo | Asco    | 15 | 32 | 16 | 16 | 79 | GCA_009982855.1  | DOE Joint Genome Institute                                 |
| 571 | <i>Pyrenophora seminiperda</i>      | Dothideo | Asco    | 15 | 27 | 21 | 16 | 79 | GCA_000465215.2  | Brigham Young University                                   |
| 572 | <i>Ascochyta koolunga</i>           | Dothideo | Asco    | 14 | 34 | 16 | 15 | 79 | GCA_004151165.1  | Curtin University                                          |
| 573 | <i>Bipolaris cookei</i>             | Dothideo | Asco    | 16 | 28 | 19 | 16 | 79 | GCA_002286855.1  | University of Arkansas                                     |
| 574 | <i>Pyrenophora tritici-repentis</i> | Dothideo | Asco    | 15 | 28 | 20 | 16 | 79 | GCA_008692205.1  | Curtin University                                          |
| 575 | <i>Fusarium dimerum</i>             | Sordario | Asco    | 11 | 36 | 19 | 13 | 79 | GCA_013623525.1  | US Department of Agriculture, Agriculture Research Service |
| 576 | <i>Alternaria gansuensis</i>        | Dothideo | Asco    | 15 | 30 | 17 | 17 | 79 | GCA_009289805.1  | Lanzhou University                                         |
| 577 | <i>Cladosporium sphaerospermum</i>  | Dothideo | Asco    | 14 | 34 | 18 | 13 | 79 | GCA_000261425.2  | UNIVERSITY OF MALAYA                                       |
| 578 | <i>Botrytis elliptica</i>           | Leotio   | Asco    | 14 | 35 | 15 | 15 | 79 | GCA_004786205.1  | Wageningen University                                      |
| 579 | <i>Aspergillus avenaceus</i>        | Eurotio  | Asco    | 15 | 33 | 14 | 17 | 79 | GCA_009193465.1  | DOE Joint Genome Institute                                 |
| 580 | <i>Talaromyces cellulolyticus</i>   | Eurotio  | Asco    | 12 | 31 | 22 | 13 | 78 | GCA_009805475.1  | JNU                                                        |
| 581 | <i>Talaromyces amestolkiae</i>      | Eurotio  | Asco    | 11 | 33 | 22 | 12 | 78 | GCA_001896365.1  | Centro de Investigaciones Biologicas                       |
| 582 | <i>Penicillium sp. 'occitanis'</i>  | Eurotio  | Asco    | 12 | 31 | 22 | 13 | 78 | GCA_002382835.1  | Center for Genomic Regulation (CRG)                        |
| 583 | <i>Zasmidium citrigriseum</i>       | Dothideo | Asco    | 11 | 35 | 17 | 15 | 78 | GCA_002786025.1  | Northwest A&F University                                   |
| 584 | <i>Pyricularia pennisetigena</i>    | Sordario | Asco    | 16 | 26 | 21 | 15 | 78 | GCA_004337985.1  | Academia Sinica                                            |
| 585 | <i>Pyricularia sp. CBS 133598</i>   | Sordario | Asco    | 15 | 28 | 21 | 14 | 78 | GCA_004337975.1  | Academia Sinica                                            |
| 586 | <i>Falciophora oryzae</i>           | Sordario | Asco    | 15 | 28 | 19 | 16 | 78 | GCA_000733355.1  | Institute of Biotechnology                                 |
| 587 | <i>Coniochaeta prunicola</i>        | Sordario | Asco    | 14 | 32 | 19 | 13 | 78 | GCA_007388105.1  | University of Arizona                                      |
| 588 | <i>Penicillium arizonense</i>       | Eurotio  | Asco    | 12 | 34 | 19 | 13 | 78 | GCA_001773325.1  | Chalmers University of Technology                          |
| 589 | <i>Magnaporthe sp. MG05</i>         | Sordario | Asco    | 15 | 26 | 21 | 16 | 78 | GCA_001936065.1  | Centre for Cellular and Molecular Platforms                |
| 590 | <i>Aspergillus turcosus</i>         | Eurotio  | Asco    | 14 | 34 | 17 | 13 | 78 | GCA_002234965.2  | University of Montreal                                     |

|     |                                       |          |         |    |    |    |    |    |                 |                                                                  |
|-----|---------------------------------------|----------|---------|----|----|----|----|----|-----------------|------------------------------------------------------------------|
| 591 | <i>Fusarium setosum</i>               | Sordario | Asco    | 13 | 35 | 16 | 14 | 78 | GCA_013623625.1 | US Department of<br>Agriculture, Agriculture<br>Research Service |
| 592 | <i>Exserohilum turcicum</i>           | Dothideo | Asco    | 14 | 30 | 20 | 14 | 78 | GCA_000359705.1 | JGI                                                              |
| 593 | <i>Stachybotrys chartarum</i>         | Sordario | Asco    | 15 | 30 | 19 | 14 | 78 | GCA_000732565.1 | UT Southwestern                                                  |
| 594 | <i>Valsa sordida</i>                  | Sordario | Asco    | 13 | 36 | 16 | 13 | 78 | GCA_003795275.1 | Northwest A&F<br>University                                      |
| 595 | <i>Leptosphaeria biglobosa</i>        | Dothideo | Asco    | 14 | 30 | 20 | 14 | 78 | GCA_900465125.1 | GSC                                                              |
| 596 | <i>Auricularia heimuer</i>            | Agarico  | Basidio | 17 | 26 | 19 | 16 | 78 | GCA_002287115.1 | Beijing Forestry<br>University                                   |
| 597 | <i>Rutstroemia sydowiana</i>          | Leotio   | Asco    | 13 | 34 | 16 | 15 | 78 | GCA_000812895.1 | USDA-ARS                                                         |
| 598 | <i>Fusarium cuneirostrum</i>          | Sordario | Asco    | 13 | 33 | 16 | 16 | 78 | GCA_001680505.1 | Iowa State University                                            |
| 599 | <i>Stachybotrys chlorohalonata</i>    | Sordario | Asco    | 16 | 29 | 19 | 14 | 78 | GCA_000732775.1 | UT Southwestern                                                  |
| 600 | <i>Glonium stellatum</i>              | Dothideo | Asco    | 14 | 31 | 17 | 16 | 78 | GCA_001692915.1 | 1000 Fungal Genome<br>Project                                    |
| 601 | <i>Botrytis hyacinthi</i>             | Leotio   | Asco    | 14 | 34 | 14 | 16 | 78 | GCA_004786245.1 | Wageningen University                                            |
| 602 | <i>Arachnopeziza araneosa</i>         | Leotio   | Asco    | 14 | 27 | 21 | 16 | 78 | GCA_003988855.1 | Manaaki Whenua<br>Landcare Research                              |
| 603 | <i>Botrytis galanthina</i>            | Leotio   | Asco    | 14 | 34 | 16 | 14 | 78 | GCA_004916875.1 | Wageningen University                                            |
| 604 | <i>Dactylellina haptotyla</i>         | Orbilio  | Asco    | 13 | 32 | 19 | 14 | 78 | GCA_000441935.1 | Lund University                                                  |
| 605 | <i>Aureobasidium melanogenum</i>      | Dothideo | Asco    | 15 | 30 | 18 | 15 | 78 | GCA_002156615.1 | Ocean University of<br>China                                     |
| 606 | <i>Sphaceloma murrayae</i>            | Dothideo | Asco    | 14 | 32 | 17 | 15 | 78 | GCA_002895985.1 | Nanjing Forestry<br>University                                   |
| 607 | <i>Talaromyces verruculosus</i>       | Eurotio  | Asco    | 12 | 32 | 20 | 13 | 77 | GCA_001305275.1 | Penicillium verruculosum                                         |
| 608 | <i>Coniochaeta ligniaria</i>          | Sordario | Asco    | 15 | 31 | 17 | 14 | 77 | GCA_001879275.1 | DOE Joint Genome<br>Institute                                    |
| 609 | <i>Talaromyces stollii</i>            | Eurotio  | Asco    | 11 | 33 | 21 | 12 | 77 | GCA_014065225.1 | Beijing University of<br>Chemical Technology                     |
| 610 | <i>Pyricularia oryzae</i>             | Sordario | Asco    | 16 | 26 | 20 | 15 | 77 | GCA_004785725.1 | Kansas State University                                          |
| 611 | <i>Penicillium brasilianum</i>        | Eurotio  | Asco    | 14 | 32 | 18 | 13 | 77 | GCA_001048715.1 | HKI JENA                                                         |
| 612 | <i>Hypoxylon sp. CI-4A</i>            | Sordario | Asco    | 15 | 28 | 20 | 14 | 77 | GCA_002120315.1 | DOE Joint Genome<br>Institute                                    |
| 613 | <i>Magnaporthe sp. MG03</i>           | Sordario | Asco    | 15 | 27 | 20 | 15 | 77 | GCA_001936055.1 | Centre for Cellular and<br>Molecular Platforms                   |
| 614 | <i>Annulohypoxylon truncatum</i>      | Sordario | Asco    | 14 | 29 | 20 | 14 | 77 | GCA_902805465.1 | CEBITEC                                                          |
| 615 | <i>Aspergillus oerlinghausenensis</i> | Eurotio  | Asco    | 12 | 35 | 18 | 12 | 77 | GCA_014250555.1 | Vanderbilt University                                            |
| 616 | <i>Auricularia auricula-judae</i>     | Agarico  | Basidio | 17 | 24 | 19 | 17 | 77 | GCA_002092955.1 | Jilin Agricultural<br>University                                 |
| 617 | <i>Jackrogersella multiformis</i>     | Sordario | Asco    | 14 | 28 | 20 | 15 | 77 | GCA_902806575.1 | CEBITEC                                                          |
| 618 | <i>Fusarium aywerte</i>               | Sordario | Asco    | 14 | 29 | 19 | 15 | 77 | GCA_013186375.1 | US Department of<br>Agriculture, Agriculture<br>Research Service |
| 619 | <i>Calonectria pseudonaviculata</i>   | Sordario | Asco    | 13 | 32 | 18 | 14 | 77 | GCA_001696505.1 | USDA-ARS                                                         |

|     |                                   |          |         |    |    |    |    |    |                 |                                                                  |
|-----|-----------------------------------|----------|---------|----|----|----|----|----|-----------------|------------------------------------------------------------------|
| 620 | <i>Botrytis tulipae</i>           | Leotio   | Asco    | 14 | 34 | 14 | 15 | 77 | GCA_004786125.1 | Wageningen University                                            |
| 621 | <i>Fusarium continuum</i>         | Sordario | Asco    | 13 | 32 | 16 | 16 | 77 | GCA_013184455.1 | US Department of<br>Agriculture, Agriculture<br>Research Service |
| 622 | <i>Botryotinia calthae</i>        | Leotio   | Asco    | 15 | 33 | 14 | 15 | 77 | GCA_004379285.1 | Wageningen University                                            |
| 623 | <i>Botrytis fragariae</i>         | Leotio   | Asco    | 14 | 33 | 14 | 16 | 77 | GCA_013461495.1 | University of Maryland,<br>College Park                          |
| 624 | <i>Lomentospora prolificans</i>   | Sordario | Asco    | 16 | 28 | 20 | 13 | 77 | GCA_002276285.1 | Johns Hopkins University                                         |
| 625 | <i>Marssonina brunnea</i>         | Leotio   | Asco    | 15 | 30 | 16 | 16 | 77 | GCA_011750725.1 | Nanjing Forestry<br>University                                   |
| 626 | <i>Hymenopellis chiangmaiae</i>   | Agarico  | Basidio | 16 | 29 | 15 | 17 | 77 | GCA_003314085.1 | Kunming University of<br>Science and Technology                  |
| 627 | <i>Claviceps aff. purpurea</i>    | Sordario | Asco    | 10 | 37 | 20 | 9  | 76 | GCA_004016085.1 | Agriculture and Agri-<br>Food Canada                             |
| 628 | <i>Scytalidium sp. 3C</i>         | Leotio   | Asco    | 12 | 32 | 19 | 13 | 76 | GCA_000743665.3 | Saint-Petersburg State<br>University                             |
| 629 | <i>Talaromyces wortmannii</i>     | Eurotio  | Asco    | 11 | 28 | 21 | 16 | 76 | GCA_001939245.1 | Universidad Nacional<br>Agraria La Molina,                       |
| 630 | <i>Pyricularia grisea</i>         | Sordario | Asco    | 16 | 25 | 21 | 14 | 76 | GCA_003933175.1 | IARI                                                             |
| 631 | <i>Coniochaeta sp. NC1642</i>     | Sordario | Asco    | 14 | 31 | 18 | 13 | 76 | GCA_007388135.1 | University of Arizona                                            |
| 632 | <i>Coniochaeta sp. YLH0009</i>    | Sordario | Asco    | 14 | 31 | 18 | 13 | 76 | GCA_007388125.1 | University of Arizona                                            |
| 633 | <i>Coniochaeta sp. AEA 9055</i>   | Sordario | Asco    | 14 | 31 | 18 | 13 | 76 | GCA_007388195.1 | University of Arizona                                            |
| 634 | <i>Coniochaeta sp. AEA 9094</i>   | Sordario | Asco    | 14 | 31 | 18 | 13 | 76 | GCA_007388145.1 | University of Arizona                                            |
| 635 | <i>Aspergillus neoellipticus</i>  | Eurotio  | Asco    | 11 | 36 | 18 | 11 | 76 | GCA_003116565.1 | personal                                                         |
| 636 | <i>Valsa malicola</i>             | Sordario | Asco    | 12 | 35 | 16 | 13 | 76 | GCA_003795315.1 | Northwest A&F<br>University                                      |
| 637 | <i>Aspergillus persii</i>         | Eurotio  | Asco    | 15 | 31 | 16 | 14 | 76 | GCA_002215965.1 | National Institute of<br>Biological Resources                    |
| 638 | <i>Viridothelium virens</i>       | Dothideo | Asco    | 14 | 29 | 18 | 15 | 76 | GCA_010094025.1 | DOE Joint Genome<br>Institute                                    |
| 639 | <i>Morchella septimelata</i>      | Pezizo   | Asco    | 15 | 32 | 15 | 14 | 76 | GCA_003062385.1 | Biotechnology and<br>Nuclear Technology<br>Research Institute    |
| 640 | <i>Botryotinia narcissicola</i>   | Leotio   | Asco    | 14 | 32 | 15 | 15 | 76 | GCA_004786225.1 | Wageningen University                                            |
| 641 | <i>Valsa mali</i>                 | Sordario | Asco    | 14 | 35 | 13 | 14 | 76 | GCA_000818155.1 | Northwest A&F<br>University                                      |
| 642 | <i>Botrytis fabae</i>             | Leotio   | Asco    | 14 | 34 | 13 | 15 | 76 | GCA_004335055.1 | Curtin University                                                |
| 643 | <i>Aureobasidium subglaciale</i>  | Dothideo | Asco    | 13 | 32 | 18 | 13 | 76 | GCA_000721755.1 | JGI                                                              |
| 644 | <i>Fusarium penzigii</i>          | Sordario | Asco    | 12 | 31 | 19 | 14 | 76 | GCA_013623535.1 | US Department of<br>Agriculture, Agriculture<br>Research Service |
| 645 | <i>Myriosclerotinia duriaeana</i> | Leotio   | Asco    | 16 | 30 | 14 | 16 | 76 | GCA_002162615.1 | University of Toronto<br>Mississauga                             |



|     |                                    |          |         |    |    |    |    |    |                 |                                                            |
|-----|------------------------------------|----------|---------|----|----|----|----|----|-----------------|------------------------------------------------------------|
| 646 | <i>Botrytis paeoniae</i>           | Leotio   | Asco    | 14 | 33 | 14 | 15 | 76 | GCA_001005785.1 | Washington State University                                |
| 647 | <i>Fusarium illudens</i>           | Sordario | Asco    | 13 | 32 | 14 | 17 | 76 | GCA_013623515.1 | US Department of Agriculture, Agriculture Research Service |
| 648 | <i>Clavaria fumosa</i>             | Agarico  | Basidio | 7  | 37 | 19 | 12 | 75 | GCA_001179745.1 | Royal Botanic Gardens, Kew                                 |
| 649 | <i>Penicillium sp. CF01</i>        | Eurotio  | Asco    | 13 | 35 | 15 | 12 | 75 | GCA_005250745.1 | INAIL-Research Area                                        |
| 650 | <i>Talaromyces adpressus</i>       | Eurotio  | Asco    | 11 | 32 | 20 | 12 | 75 | GCA_002775195.1 | University of Naples "Federico II"                         |
| 651 | <i>Passalora fulva</i>             | Dothideo | Asco    | 12 | 32 | 14 | 17 | 75 | GCA_000301015.1 | Wageningen UR (University & Research centre)               |
| 652 | <i>Magnaporthe sp. MG12</i>        | Sordario | Asco    | 14 | 27 | 20 | 14 | 75 | GCA_001936955.1 | Centre for Cellular and Molecular Platforms                |
| 653 | <i>Talaromyces islandicus</i>      | Eurotio  | Asco    | 13 | 28 | 18 | 16 | 75 | GCA_000985935.1 | CEBITEC                                                    |
| 654 | <i>Coniochaeta sp. IL0111</i>      | Sordario | Asco    | 14 | 31 | 17 | 13 | 75 | GCA_007388115.1 | University of Arizona                                      |
| 655 | <i>Magnaportheopsis poae</i>       | Sordario | Asco    | 14 | 29 | 17 | 15 | 75 | GCA_000193285.1 | Broad Institute                                            |
| 656 | <i>Hypoxylon pulvicidum</i>        | Sordario | Asco    | 14 | 27 | 19 | 15 | 75 | GCA_902806525.1 | CEBITEC                                                    |
| 657 | <i>Penicillium antarcticum</i>     | Eurotio  | Asco    | 14 | 33 | 15 | 13 | 75 | GCA_002072345.1 | Chalmers University of Technology                          |
| 658 | <i>Pyrenophora teres</i>           | Dothideo | Asco    | 15 | 25 | 19 | 16 | 75 | GCA_008086845.1 | NDSU                                                       |
| 659 | <i>Penicillium paxilli</i>         | Eurotio  | Asco    | 12 | 36 | 16 | 11 | 75 | GCA_000347475.1 | Massey University                                          |
| 660 | <i>Zasmidium angulare</i>          | Dothideo | Asco    | 12 | 33 | 14 | 16 | 75 | GCA_002786045.1 | Northwest A&F University                                   |
| 661 | <i>Hypoxylon sp. EC38</i>          | Sordario | Asco    | 14 | 27 | 19 | 15 | 75 | GCA_002120335.1 | DOE Joint Genome Institute                                 |
| 662 | <i>Phialocephala sp. D728</i>      | Leotio   | Asco    | 13 | 30 | 18 | 14 | 75 | GCA_003988865.1 | Manaaki Whenua Landcare Research                           |
| 663 | <i>Lachnellula willkommii</i>      | Leotio   | Asco    | 15 | 34 | 10 | 16 | 75 | GCA_007825375.1 | Canadian Food Inspection Agency (CFIA)                     |
| 664 | <i>Hypoxylon sp. CO27-5</i>        | Sordario | Asco    | 14 | 27 | 19 | 15 | 75 | GCA_002120305.1 | DOE Joint Genome Institute                                 |
| 665 | <i>Calonectria henricotiae</i>     | Sordario | Asco    | 14 | 31 | 16 | 14 | 75 | GCA_004380885.1 | USDA-ARS                                                   |
| 666 | <i>Pyrenophora graminea</i>        | Dothideo | Asco    | 15 | 25 | 19 | 16 | 75 | GCA_012365135.1 | USDA-ARS                                                   |
| 667 | <i>Neonectria hederæ</i>           | Sordario | Asco    | 14 | 33 | 14 | 14 | 75 | GCA_003385265.1 | USDA-ARS                                                   |
| 668 | <i>Botrytis cinerea</i>            | Leotio   | Asco    | 14 | 33 | 13 | 15 | 75 | GCA_000292645.1 | Wageningen University                                      |
| 669 | <i>Aspergillus wentii</i>          | Eurotio  | Asco    | 14 | 32 | 13 | 16 | 75 | GCA_001890725.1 | DOE Joint Genome Institute                                 |
| 670 | <i>Pirottaea palmicola</i>         | Leotio   | Asco    | 15 | 28 | 14 | 18 | 75 | GCA_003988945.1 | Manaaki Whenua Landcare Research                           |
| 671 | <i>Venturia nashicola</i>          | Dothideo | Asco    | 14 | 33 | 12 | 16 | 75 | GCA_004522665.1 | POSTECH                                                    |
| 672 | <i>Myriosclerotinia scirpicola</i> | Leotio   | Asco    | 15 | 31 | 13 | 16 | 75 | GCA_002162505.1 | University of Toronto Mississauga                          |

|     |                                       |          |         |    |    |    |    |    |                 |                                                                  |
|-----|---------------------------------------|----------|---------|----|----|----|----|----|-----------------|------------------------------------------------------------------|
| 673 | <i>Sclerotinia glacialis</i>          | Leotio   | Asco    | 15 | 29 | 15 | 16 | 75 | GCA_002162575.1 | University of Toronto<br>Mississauga                             |
| 674 | <i>Lachnellula subtilissima</i>       | Leotio   | Asco    | 15 | 31 | 14 | 15 | 75 | GCA_007821545.1 | Canadian Food<br>Inspection Agency (CFIA)                        |
| 675 | <i>Puccinia arachidis</i>             | Puccinio | Basidio | 14 | 30 | 15 | 15 | 74 | GCA_001013415.1 | Junagadh Agricultural<br>University                              |
| 676 | <i>Talaromyces pinophilus</i>         | Eurotio  | Asco    | 11 | 31 | 20 | 12 | 74 | GCA_011392495.1 | Embrapa Agroenergia                                              |
| 677 | <i>Cercospora nicotianae</i>          | Dothideo | Asco    | 13 | 29 | 16 | 16 | 74 | GCA_002994015.1 | VIB                                                              |
| 678 | <i>Magnaporthe sp. MG08</i>           | Sordario | Asco    | 14 | 26 | 20 | 14 | 74 | GCA_001936555.1 | Centre for Cellular and<br>Molecular Platforms                   |
| 679 | <i>Phialemoniopsis curvata</i>        | Sordario | Asco    | 14 | 28 | 18 | 14 | 74 | GCA_004353045.1 | UES / AFRL                                                       |
| 680 | <i>Aspergillus fumigatus</i>          | Eurotio  | Asco    | 11 | 35 | 17 | 11 | 74 | GCA_005768625.2 | Nanyang Technological<br>University                              |
| 681 | <i>Hypomontagnella submonticulosa</i> | Sordario | Asco    | 14 | 28 | 18 | 14 | 74 | GCA_902806495.1 | CEBITEC                                                          |
| 682 | <i>Hypoxylon sp. E7406B</i>           | Sordario | Asco    | 14 | 26 | 19 | 15 | 74 | GCA_000931505.1 | Yale University                                                  |
| 683 | <i>Graphilbum fragrans</i>            | Sordario | Asco    | 15 | 28 | 17 | 14 | 74 | GCA_001513895.1 | University of Pretoria                                           |
| 684 | <i>Aspergillus phoenicis</i>          | Eurotio  | Asco    | 14 | 34 | 12 | 14 | 74 | GCA_003344505.1 | DOE Joint Genome<br>Institute                                    |
| 685 | <i>Aspergillus tubingensis</i>        | Eurotio  | Asco    | 14 | 34 | 14 | 12 | 74 | GCA_010614855.1 | Hankyong National<br>University                                  |
| 686 | <i>Fusarium zealandicum</i>           | Sordario | Asco    | 14 | 34 | 10 | 16 | 74 | GCA_013266195.1 | US Department of<br>Agriculture, Agriculture<br>Research Service |
| 687 | <i>Thermothelomyces thermophilus</i>  | Sordario | Asco    | 16 | 27 | 18 | 13 | 74 | GCA_000226095.1 | DOE Joint Genome<br>Institute                                    |
| 688 | <i>Sclerotium cepivorum</i>           | 0        | Asco    | 15 | 28 | 15 | 16 | 74 | GCA_002162485.1 | University of Toronto<br>Mississauga                             |
| 689 | <i>Paradendryphiella salina</i>       | Dothideo | Asco    | 15 | 27 | 17 | 15 | 74 | GCA_900634815.1 | DTU Bioengineering                                               |
| 690 | <i>Cantharellus lutescens</i>         | Agarico  | Basidio | 10 | 37 | 18 | 8  | 73 | GCA_003314295.1 | Kunming University of<br>Science and Technology                  |
| 691 | <i>Golovinomyces magnicellulatus</i>  | Leotio   | Asco    | 9  | 32 | 20 | 12 | 73 | GCA_006912115.1 | The Ohio State University                                        |
| 692 | <i>Uromyces transversalis</i>         | Puccinio | Basidio | 14 | 32 | 12 | 15 | 73 | GCA_002994575.1 | University of Georgia                                            |
| 693 | <i>Chaetomium cochliodes</i>          | Sordario | Asco    | 15 | 25 | 21 | 12 | 73 | GCA_001752565.1 | BOKU University                                                  |
| 694 | <i>Mycena chlorophos</i>              | Agarico  | Basidio | 13 | 26 | 17 | 17 | 73 | GCA_001612595.1 | KEIO UNIVERSITY                                                  |
| 695 | <i>Cercospora berteroa</i>            | Dothideo | Asco    | 12 | 28 | 16 | 17 | 73 | GCA_002933655.1 | VIB                                                              |
| 696 | <i>Penicillium sp. MA 6036</i>        | Eurotio  | Asco    | 12 | 32 | 16 | 13 | 73 | GCA_003138045.1 | University of Natural<br>Resources and Life<br>Sciences, Vienna  |
| 697 | <i>Aspergillus brasiliensis</i>       | Eurotio  | Asco    | 14 | 32 | 14 | 13 | 73 | GCA_001889945.1 | DOE Joint Genome<br>Institute                                    |
| 698 | <i>Fusarium albidum</i>               | Sordario | Asco    | 13 | 31 | 14 | 15 | 73 | GCA_013618265.1 | US Department of<br>Agriculture, Agriculture<br>Research Service |

|     |                                                  |          |         |    |    |    |    |    |                 |                                                                              |
|-----|--------------------------------------------------|----------|---------|----|----|----|----|----|-----------------|------------------------------------------------------------------------------|
| 699 | <i>Hysterium pulicare</i>                        | Dothideo | Asco    | 14 | 28 | 16 | 15 | 73 | GCA_000467715.1 | Assembling the Fungal Tree of Life (AFTOL)                                   |
| 700 | <i>Lachnellula cervina</i>                       | Leotio   | Asco    | 15 | 30 | 12 | 16 | 73 | GCA_007825325.1 | Canadian Food Inspection Agency (CFIA)                                       |
| 701 | <i>Penicillium steckii</i>                       | Eurotio  | Asco    | 12 | 33 | 16 | 12 | 73 | GCA_002072375.1 | Chalmers University of Technology                                            |
| 702 | <i>Ciboria shiraiana</i>                         | Leotio   | Asco    | 15 | 27 | 15 | 16 | 73 | GCA_008122225.1 | Southwest University                                                         |
| 703 | <i>Pezoloma ericae</i>                           | Leotio   | Asco    | 13 | 33 | 15 | 12 | 73 | GCA_002865625.1 | DOE Joint Genome Institute                                                   |
| 704 | <i>Lanzia echinophila</i>                        | Leotio   | Asco    | 14 | 31 | 13 | 15 | 73 | GCA_000812885.1 | USDA-ARS                                                                     |
| 705 | <i>Sclerotinia sclerotiorum</i>                  | Leotio   | Asco    | 15 | 27 | 15 | 16 | 73 | GCA_001857865.1 | Curtin University                                                            |
| 706 | <i>Aspergillus vadensis</i>                      | Eurotio  | Asco    | 14 | 34 | 13 | 12 | 73 | GCA_003184925.1 | DOE Joint Genome Institute                                                   |
| 707 | <i>Botryotinia convoluta</i>                     | Leotio   | Asco    | 14 | 30 | 14 | 15 | 73 | GCA_004786275.1 | Wageningen University                                                        |
| 708 | <i>Aspergillus uvarum</i>                        | Eurotio  | Asco    | 12 | 35 | 13 | 13 | 73 | GCA_003184745.1 | DOE Joint Genome Institute                                                   |
| 709 | <i>Neurospora pannonica</i>                      | Sordario | Asco    | 16 | 23 | 20 | 14 | 73 | GCA_009805235.1 | University of California, Berkeley                                           |
| 710 | <i>Decorospora gaudefroyi</i>                    | Dothideo | Asco    | 15 | 24 | 20 | 14 | 73 | GCA_010015605.1 | DOE Joint Genome Institute                                                   |
| 711 | <i>Didymosphaeria enalia</i>                     | Dothideo | Asco    | 14 | 25 | 18 | 16 | 73 | GCA_010094045.1 | DOE Joint Genome Institute                                                   |
| 712 | <i>Monilinia aucupariae</i>                      | Leotio   | Asco    | 14 | 31 | 13 | 15 | 73 | GCA_002162555.1 | University of Toronto Mississauga                                            |
| 713 | <i>Venturia pyrina</i>                           | Dothideo | Asco    | 14 | 32 | 12 | 15 | 73 | GCA_000738655.1 | La Trobe University Department of Botany                                     |
| 714 | <i>Fusarium verrucosum</i>                       | Sordario | Asco    | 14 | 26 | 18 | 15 | 73 | GCA_013623715.1 | US Department of Agriculture, Agriculture Research Service                   |
| 715 | <i>Hymenopellis radicata</i>                     | Agarico  | Basidio | 14 | 27 | 13 | 19 | 73 | GCA_003314005.1 | Kunming University of Science and Technology                                 |
| 716 | <i>Pseudocercospora pini-densiflorae</i>         | Dothideo | Asco    | 11 | 32 | 13 | 16 | 72 | GCA_000504365.2 | Canada's Michael Smith Genome Sciences Centre                                |
| 717 | <i>Talaromyces rugulosus</i>                     | Eurotio  | Asco    | 13 | 28 | 16 | 15 | 72 | GCA_013368755.1 | Xi'an Jiaotong University                                                    |
| 718 | <i>Cercospora sesami</i>                         | Dothideo | Asco    | 12 | 29 | 16 | 15 | 72 | GCA_013365235.1 | Banaras Hindu University                                                     |
| 719 | <i>Cercospora cf. sigesbeckiae</i>               | Dothideo | Asco    | 11 | 30 | 17 | 14 | 72 | GCA_005356805.1 | University of Arkansas National Center For Agricultural Utilization Research |
| 720 | <i>Aspergillus olivimuriae</i>                   | Eurotio  | Asco    | 13 | 29 | 19 | 11 | 72 | GCA_003719415.1 | Agricultural Utilization Research                                            |
| 721 | <i>Cercospora citrullina</i>                     | Dothideo | Asco    | 12 | 30 | 15 | 15 | 72 | GCA_013365195.1 | Banaras Hindu University                                                     |
| 722 | <i>Coniochaeta hoffmannii</i>                    | Sordario | Asco    | 14 | 28 | 17 | 13 | 72 | GCA_002798055.1 | IHI Zittau / TU Dresden                                                      |
| 723 | <i>Pseudogymnoascus sp. VKM F-4281 (FW-2241)</i> | Leotio   | Asco    | 12 | 30 | 20 | 10 | 72 | GCA_000750745.1 | Moscow State University                                                      |

|     |                                       |          |      |    |    |    |    |    |                 |                                                                                 |
|-----|---------------------------------------|----------|------|----|----|----|----|----|-----------------|---------------------------------------------------------------------------------|
| 724 | <i>Chaetomium globosum</i>            | Sordario | Asco | 14 | 27 | 21 | 10 | 72 | GCA_000143365.1 | The Genome Sequencing Platform, The Genome Assembly Team                        |
| 725 | <i>Neonectria punicea</i>             | Sordario | Asco | 15 | 31 | 12 | 14 | 72 | GCA_003385315.1 | USDA-ARS                                                                        |
| 726 | <i>Penicillium fuscoglaucum</i>       | Eurotio  | Asco | 12 | 31 | 16 | 13 | 72 | GCA_000576735.1 | INRA-LIPM                                                                       |
| 727 | <i>Penicillium sp. SPG-F1</i>         | Eurotio  | Asco | 14 | 28 | 16 | 14 | 72 | GCA_003800495.1 | Texas A&M University<br>Corpus Christi                                          |
| 728 | <i>Massariosphaeria phaeospora</i>    | Dothideo | Asco | 15 | 24 | 18 | 15 | 72 | GCA_011032825.1 | DOE Joint Genome Institute                                                      |
| 729 | <i>Penicillium citrinum</i>           | Eurotio  | Asco | 13 | 31 | 15 | 13 | 72 | GCA_001950535.1 | RIKEN Center for Life Science Technologies,<br>Division of Genomic Technologies |
| 730 | <i>Pseudovirgaria hyperparasitica</i> | Dothideo | Asco | 13 | 25 | 18 | 16 | 72 | GCA_010093815.1 | DOE Joint Genome Institute                                                      |
| 731 | <i>Aspergillus homomorphus</i>        | Eurotio  | Asco | 14 | 33 | 11 | 14 | 72 | GCA_003184865.1 | DOE Joint Genome Institute                                                      |
| 732 | <i>Aspergillus costaricensis</i>      | Eurotio  | Asco | 14 | 33 | 13 | 12 | 72 | GCA_003184835.1 | DOE Joint Genome Institute                                                      |
| 733 | <i>Aspergillus indologenus</i>        | Eurotio  | Asco | 13 | 34 | 12 | 13 | 72 | GCA_003184685.1 | DOE Joint Genome Institute                                                      |
| 734 | <i>Hawksworthiomyces lignivorus</i>   | Sordario | Asco | 14 | 26 | 19 | 13 | 72 | GCA_002917075.1 | University of Pretoria                                                          |
| 735 | <i>Clathrospora elyngae</i>           | Dothideo | Asco | 15 | 25 | 17 | 15 | 72 | GCA_010015635.1 | DOE Joint Genome Institute                                                      |
| 736 | <i>Aspergillus incahuasiensis</i>     | Eurotio  | Asco | 12 | 32 | 17 | 11 | 72 | GCA_003719405.1 | National Center For Agricultural Utilization Research                           |
| 737 | <i>Aspergillus luchuensis</i>         | Eurotio  | Asco | 14 | 33 | 12 | 13 | 72 | GCA_001890685.1 | DOE Joint Genome Institute                                                      |
| 738 | <i>Aspergillus awamori</i>            | Eurotio  | Asco | 14 | 33 | 12 | 13 | 72 | GCA_001599415.1 | RIKEN Center for Life Science Technologies,<br>Division of Genomic Technologies |
| 739 | <i>Aspergillus aculeatinus</i>        | Eurotio  | Asco | 13 | 34 | 12 | 13 | 72 | GCA_003184765.1 | DOE Joint Genome Institute                                                      |
| 740 | <i>Aspergillus brunneoviolaceus</i>   | Eurotio  | Asco | 13 | 34 | 12 | 13 | 72 | GCA_003184695.1 | DOE Joint Genome Institute                                                      |
| 741 | <i>Botrytis porri</i>                 | Leotio   | Asco | 14 | 31 | 12 | 15 | 72 | GCA_004786265.1 | Wageningen University                                                           |
| 742 | <i>Aspergillus fijiensis</i>          | Eurotio  | Asco | 13 | 34 | 12 | 13 | 72 | GCA_003184825.1 | DOE Joint Genome Institute                                                      |
| 743 | <i>Neurospora sp. FGSC 26635</i>      | Sordario | Asco | 14 | 23 | 19 | 16 | 72 | GCA_009804975.1 | University of California, Berkeley                                              |
| 744 | <i>Neurospora sp. LNF1-2</i>          | Sordario | Asco | 14 | 23 | 19 | 16 | 72 | GCA_009805125.1 | University of California, Berkeley                                              |

|     |                                  |          |      |    |    |    |    |    |                 |                                                             |
|-----|----------------------------------|----------|------|----|----|----|----|----|-----------------|-------------------------------------------------------------|
| 745 | <i>Neurospora sp. FGSC 26631</i> | Sordario | Asco | 14 | 23 | 19 | 16 | 72 | GCA_009805105.1 | University of California, Berkeley                          |
| 746 | <i>Neurospora sp. FGSC 26629</i> | Sordario | Asco | 14 | 23 | 19 | 16 | 72 | GCA_009805155.1 | University of California, Berkeley                          |
| 747 | <i>Neurospora sp. FGSC 26633</i> | Sordario | Asco | 14 | 23 | 19 | 16 | 72 | GCA_009804945.1 | University of California, Berkeley                          |
| 748 | <i>Neurospora sp. LNF1-1</i>     | Sordario | Asco | 14 | 23 | 19 | 16 | 72 | GCA_009805225.1 | University of California, Berkeley                          |
| 749 | <i>Neurospora sp. FGSC 26630</i> | Sordario | Asco | 14 | 23 | 19 | 16 | 72 | GCA_009805085.1 | University of California, Berkeley                          |
| 750 | <i>Neurospora sp. FGSC 26627</i> | Sordario | Asco | 14 | 23 | 19 | 16 | 72 | GCA_009805365.1 | University of California, Berkeley                          |
| 751 | <i>Venturia aucupariae</i>       | Dothideo | Asco | 14 | 32 | 12 | 14 | 72 | GCA_003693225.1 | INRA                                                        |
| 752 | <i>Morchella importuna</i>       | Pezizo   | Asco | 15 | 30 | 14 | 13 | 72 | GCA_003444635.1 | Huazhong Agricultural University                            |
| 753 | <i>Morchella sextelata</i>       | Pezizo   | Asco | 16 | 30 | 13 | 13 | 72 | GCA_009741755.1 | Inner Mongolia International Mongolian Hospital             |
| 754 | <i>Phyllosticta capitalensis</i> | Dothideo | Asco | 13 | 32 | 10 | 17 | 72 | GCA_001604925.1 | Citrus Research and Education Center, University of Florida |
| 755 | <i>Cercospora brassicicola</i>   | Dothideo | Asco | 11 | 29 | 16 | 15 | 71 | GCA_013365245.1 | Banaras Hindu University                                    |
| 756 | <i>Raffaelea albimanens</i>      | Sordario | Asco | 16 | 24 | 18 | 13 | 71 | GCA_002778245.1 | University of Montana                                       |
| 757 | <i>Daldinia childiae</i>         | Sordario | Asco | 15 | 25 | 17 | 14 | 71 | GCA_008694065.1 | National Institute of Biological Resources                  |
| 758 | <i>Aspergillus sclerotiorum</i>  | Eurotio  | Asco | 15 | 27 | 15 | 14 | 71 | GCA_000530345.1 | SVSB                                                        |
| 759 | <i>Penicillium sp. str. #12</i>  | Eurotio  | Asco | 14 | 27 | 16 | 14 | 71 | GCA_013138035.1 | None                                                        |
| 760 | <i>Penicillium sp. BW_12</i>     | Eurotio  | Asco | 14 | 27 | 16 | 14 | 71 | GCA_008931925.1 | Tufts University                                            |
| 761 | <i>Penicillium sp. SPG-F15</i>   | Eurotio  | Asco | 12 | 30 | 15 | 14 | 71 | GCA_003800485.1 | Texas A&M University - Corpus Christi                       |
| 762 | <i>Entonaema liquescens</i>      | Sordario | Asco | 15 | 25 | 17 | 14 | 71 | GCA_902805475.1 | CEBITEC                                                     |
| 763 | <i>Pyrenopeziza hunteri</i>      | Sordario | Asco | 15 | 24 | 17 | 15 | 71 | GCA_902806595.1 | CEBITEC                                                     |
| 764 | <i>Lachnellula hyalina</i>       | Leotio   | Asco | 15 | 30 | 10 | 16 | 71 | GCA_007821495.1 | Canadian Food Inspection Agency (CFIA)                      |
| 765 | <i>Aspergillus welwitschiae</i>  | Eurotio  | Asco | 14 | 33 | 12 | 12 | 71 | GCA_009761105.1 | Universidade Federal de Minas Gerais                        |
| 766 | <i>Hypoxylon rickii</i>          | Sordario | Asco | 15 | 23 | 19 | 14 | 71 | GCA_902806535.1 | CEBITEC                                                     |
| 767 | <i>Aspergillus niger</i>         | Eurotio  | Asco | 14 | 32 | 12 | 13 | 71 | GCA_011316255.1 | South China Agricultural University                         |
| 768 | <i>Aspergillus piperis</i>       | Eurotio  | Asco | 14 | 33 | 11 | 13 | 71 | GCA_003184755.1 | DOE Joint Genome Institute                                  |
| 769 | <i>Aspergillus japonicus</i>     | Eurotio  | Asco | 13 | 34 | 11 | 13 | 71 | GCA_003184785.1 | DOE Joint Genome Institute                                  |

|     |                                  |          |         |    |    |    |    |    |                 |                                                                              |
|-----|----------------------------------|----------|---------|----|----|----|----|----|-----------------|------------------------------------------------------------------------------|
| 770 | <i>Aspergillus sclerotii</i>     | Eurotio  | Asco    | 14 | 31 | 11 | 15 | 71 | GCA_003184635.1 | DOE Joint Genome Institute                                                   |
| 771 | <i>Thelonectria rubi</i>         | Sordario | Asco    | 12 | 29 | 16 | 14 | 71 | GCA_013420875.1 | USDA-ARS                                                                     |
| 772 | <i>Schizophyllum commune</i>     | Agarico  | Basidio | 16 | 25 | 14 | 16 | 71 | GCA_001599475.1 | RIKEN Center for Life Science Technologies, Division of Genomic Technologies |
| 773 | <i>Neurospora sp. FGSC 26632</i> | Sordario | Asco    | 14 | 23 | 19 | 15 | 71 | GCA_009804965.1 | University of California, Berkeley                                           |
| 774 | <i>Monilinia laxa</i>            | Leotio   | Asco    | 13 | 30 | 14 | 14 | 71 | GCA_009299455.1 | UniBa - Univpm                                                               |
| 775 | <i>Venturia oleaginea</i>        | Dothideo | Asco    | 14 | 31 | 11 | 15 | 71 | GCA_013176395.1 | FUJIAN AGRICULTURE AND FORESTRY UNIVERSITY                                   |
| 776 | <i>Morchella conica</i>          | Pezizo   | Asco    | 15 | 30 | 13 | 13 | 71 | GCA_003790465.1 | DOE Joint Genome Institute                                                   |
| 777 | <i>Zasmidium cellare</i>         | Dothideo | Asco    | 12 | 29 | 13 | 16 | 70 | GCA_010093935.1 | DOE Joint Genome Institute                                                   |
| 778 | <i>Cercospora kikuchii</i>       | Dothideo | Asco    | 11 | 29 | 16 | 14 | 70 | GCA_009193115.1 | School of Agriculture of the University of Buenos Aires                      |
| 779 | <i>Pseudocercospora cruenta</i>  | Dothideo | Asco    | 12 | 29 | 13 | 16 | 70 | GCA_013365205.1 | Banaras Hindu University                                                     |
| 780 | <i>Penicillium flavigenum</i>    | Eurotio  | Asco    | 13 | 29 | 15 | 13 | 70 | GCA_002072365.1 | Chalmers University of Technology                                            |
| 781 | <i>Cercospora beticola</i>       | Dothideo | Asco    | 11 | 28 | 16 | 15 | 70 | GCA_003370525.1 | University of Southern Queensland                                            |
| 782 | <i>Cercospora canescens</i>      | Dothideo | Asco    | 12 | 28 | 15 | 15 | 70 | GCA_000347735.1 | Banaras Hindu University                                                     |
| 783 | <i>Talaromyces funiculosus</i>   | Eurotio  | Asco    | 12 | 26 | 19 | 13 | 70 | GCA_004299765.1 | Shandong Agricultural University                                             |
| 784 | <i>Penicillium sclerotiorum</i>  | Eurotio  | Asco    | 12 | 32 | 15 | 11 | 70 | GCA_001750025.1 | Rutgers, The State University of New Jersey                                  |
| 785 | <i>Pseudocercospora eumusae</i>  | Dothideo | Asco    | 11 | 32 | 14 | 13 | 70 | GCA_001578235.1 | University of California Davis                                               |
| 786 | <i>Daldinia sp. EC12</i>         | Sordario | Asco    | 15 | 24 | 18 | 13 | 70 | GCA_002120325.1 | DOE Joint Genome Institute                                                   |
| 787 | <i>Talaromyces stipitatus</i>    | Eurotio  | Asco    | 12 | 25 | 18 | 15 | 70 | GCA_000003125.1 | J. Craig Venter Institute                                                    |
| 788 | <i>Trichothecium sympodiale</i>  | Sordario | Asco    | 16 | 20 | 21 | 13 | 70 | GCA_003012115.1 | USDA, ARS, NCAUR                                                             |
| 789 | <i>Daldinia concentrica</i>      | Sordario | Asco    | 15 | 24 | 17 | 14 | 70 | GCA_902805455.1 | CEBITEC                                                                      |
| 790 | <i>Neonectria coccinea</i>       | Sordario | Asco    | 14 | 32 | 11 | 13 | 70 | GCA_013757005.1 | US Department of Agriculture, Agriculture Research Service                   |
| 791 | <i>Delitschia confertaspora</i>  | Dothideo | Asco    | 15 | 25 | 18 | 12 | 70 | GCA_010093945.1 | DOE Joint Genome Institute                                                   |
| 792 | <i>Ampelomyces quisqualis</i>    | Dothideo | Asco    | 14 | 27 | 16 | 13 | 70 | GCA_010094095.1 | DOE Joint Genome Institute                                                   |

|     |                                       |          |         |    |    |    |    |    |                 |                                                              |
|-----|---------------------------------------|----------|---------|----|----|----|----|----|-----------------|--------------------------------------------------------------|
| 793 | <i>Penicillium expansum</i>           | Eurotio  | Asco    | 12 | 29 | 15 | 14 | 70 | GCA_004302965.1 | ARS                                                          |
| 794 | <i>Corinectria fuckeliana</i>         | Sordario | Asco    | 13 | 32 | 13 | 12 | 70 | GCA_003385255.1 | USDA-ARS                                                     |
| 795 | <i>Aspergillus floridensis</i>        | Eurotio  | Asco    | 13 | 33 | 12 | 12 | 70 | GCA_012184565.1 | Belgian Coordinated<br>Collection of<br>Microorganisms, BCCM |
| 796 | <i>Aspergillus violaceofuscus</i>     | Eurotio  | Asco    | 13 | 33 | 11 | 13 | 70 | GCA_003184705.1 | DOE Joint Genome<br>Institute                                |
| 797 | <i>Aspergillus carbonarius</i>        | Eurotio  | Asco    | 13 | 32 | 10 | 15 | 70 | GCA_001990825.1 | DOE Joint Genome<br>Institute                                |
| 798 | <i>Limonomyces culmigenus</i>         | Agarico  | Basidio | 12 | 21 | 22 | 15 | 70 | GCA_002233555.1 | USDA-ARS                                                     |
| 799 | <i>Neurospora africana</i>            | Sordario | Asco    | 14 | 21 | 20 | 15 | 70 | GCA_000604205.2 | EBC                                                          |
| 800 | <i>Ascocoryne sarcoides</i>           | Leotio   | Asco    | 13 | 32 | 14 | 11 | 70 | GCA_000328965.1 | Yale University                                              |
| 801 | <i>Neurospora sp. FGSC 26636</i>      | Sordario | Asco    | 14 | 22 | 19 | 15 | 70 | GCA_009804955.1 | University of California,<br>Berkeley                        |
| 802 | <i>Neurospora sp. FGSC 26626</i>      | Sordario | Asco    | 15 | 22 | 18 | 15 | 70 | GCA_009805385.1 | University of California,<br>Berkeley                        |
| 803 | <i>Monilinia fruticicola</i>          | Leotio   | Asco    | 14 | 28 | 13 | 15 | 70 | GCA_008692225.1 | UniBa - Univpm                                               |
| 804 | <i>Myriosclerotinia curreyana</i>     | Leotio   | Asco    | 14 | 27 | 14 | 15 | 70 | GCA_002162495.1 | University of Toronto<br>Mississauga                         |
| 805 | <i>Podospora anserina</i>             | Sordario | Asco    | 16 | 19 | 19 | 16 | 70 | GCA_005222925.1 | Lomonosov Moscow<br>State University                         |
| 806 | <i>Thermothielavioides terrestris</i> | Sordario | Asco    | 15 | 24 | 17 | 14 | 70 | GCA_900343105.1 | CHALMERS UNIVERSITY<br>OF TECHNOLOGY                         |
| 807 | <i>Sporothrix globosa</i>             | Sordario | Asco    | 14 | 25 | 18 | 13 | 70 | GCA_001630435.1 | University of Messina                                        |
| 808 | <i>Pseudocercospora fuligena</i>      | Dothideo | Asco    | 11 | 29 | 13 | 16 | 69 | GCA_014298035.1 | University of California                                     |
| 809 | <i>Cercospora cf. flagellaris</i>     | Dothideo | Asco    | 11 | 28 | 16 | 14 | 69 | GCA_005356885.1 | University of Arkansas                                       |
| 810 | <i>Penicillium verrucosum</i>         | Eurotio  | Asco    | 14 | 28 | 14 | 13 | 69 | GCA_000970515.2 | Max Rubner-Institut                                          |
| 811 | <i>Cercospora sojina</i>              | Dothideo | Asco    | 12 | 27 | 15 | 15 | 69 | GCA_002534735.1 | Chinese Academy of<br>Sciences                               |
| 812 | <i>Coniella lustricola</i>            | Sordario | Asco    | 12 | 33 | 14 | 10 | 69 | GCA_003019895.1 | DOE Joint Genome<br>Institute                                |
| 813 | <i>Penicillium nordicum</i>           | Eurotio  | Asco    | 14 | 28 | 14 | 13 | 69 | GCA_001278595.1 | Agriculture and Agri-<br>Food Canada                         |
| 814 | <i>Penicillium rolfsii</i>            | Eurotio  | Asco    | 12 | 31 | 16 | 10 | 69 | GCA_011392555.1 | Embrapa Agroenergia                                          |
| 815 | <i>Penicillium sp. BW_162_3FA</i>     | Eurotio  | Asco    | 12 | 30 | 14 | 13 | 69 | GCA_008931945.1 | Tufts University                                             |
| 816 | <i>Penicillium bifforme</i>           | Eurotio  | Asco    | 12 | 30 | 14 | 13 | 69 | GCA_000577785.1 | INRA-LIPM                                                    |
| 817 | <i>Trichothecium roseum</i>           | Sordario | Asco    | 14 | 28 | 17 | 10 | 69 | GCA_003012185.1 | USDA, ARS, NCAUR                                             |
| 818 | <i>Lachnellula arida</i>              | Leotio   | Asco    | 14 | 29 | 11 | 15 | 69 | GCA_007821475.1 | Canadian Food<br>Inspection Agency (CFIA)                    |
| 819 | <i>Lachnellula occidentalis</i>       | Leotio   | Asco    | 14 | 27 | 13 | 15 | 69 | GCA_007821535.1 | Canadian Food<br>Inspection Agency (CFIA)                    |
| 820 | <i>Daldinia eschscholtzii</i>         | Sordario | Asco    | 15 | 24 | 17 | 13 | 69 | GCA_001951055.1 | nanjing university                                           |

|     |                                    |          |      |    |    |    |    |    |                 |                                                          |
|-----|------------------------------------|----------|------|----|----|----|----|----|-----------------|----------------------------------------------------------|
| 821 | <i>Venustampulla echinocandica</i> | Leotio   | Asco | 13 | 27 | 17 | 12 | 69 | GCA_003357145.1 | The University of Texas Health Science Center at Houston |
| 822 | <i>Microthyrium microscopicum</i>  | Dothideo | Asco | 11 | 27 | 16 | 15 | 69 | GCA_010405405.1 | DOE Joint Genome Institute                               |
| 823 | <i>Cercospora zeae-maydis</i>      | Dothideo | Asco | 13 | 25 | 15 | 16 | 69 | GCA_010093985.1 | JGI                                                      |
| 824 | <i>Aspergillus neoniger</i>        | Eurotio  | Asco | 14 | 31 | 12 | 12 | 69 | GCA_003184625.1 | DOE Joint Genome Institute                               |
| 825 | <i>Sporothrix pallida</i>          | Sordario | Asco | 14 | 25 | 18 | 12 | 69 | GCA_000710705.2 | University of Messina                                    |
| 826 | <i>Aspergillus eucalypticola</i>   | Eurotio  | Asco | 14 | 32 | 11 | 12 | 69 | GCA_003184535.1 | DOE Joint Genome Institute                               |
| 827 | <i>Neurospora sp. FGSC 26634</i>   | Sordario | Asco | 14 | 22 | 18 | 15 | 69 | GCA_009804985.1 | University of California, Berkeley                       |
| 828 | <i>Neurospora sp. FGSC 26628</i>   | Sordario | Asco | 14 | 22 | 18 | 15 | 69 | GCA_009805345.1 | University of California, Berkeley                       |
| 829 | <i>Aspergillus sclerotioniger</i>  | Eurotio  | Asco | 14 | 30 | 10 | 15 | 69 | GCA_003184525.1 | DOE Joint Genome Institute                               |
| 830 | <i>Ciborinia camelliae</i>         | Leotio   | Asco | 13 | 29 | 13 | 14 | 69 | GCA_001247705.1 | Massey University                                        |
| 831 | <i>Neurospora sp. FGSC 26637</i>   | Sordario | Asco | 14 | 21 | 19 | 15 | 69 | GCA_009804845.1 | University of California, Berkeley                       |
| 832 | <i>Monilinia polystroma</i>        | Leotio   | Asco | 13 | 30 | 12 | 14 | 69 | GCA_002909645.1 | United States Department of Agriculture                  |
| 833 | <i>Podospora comata</i>            | Sordario | Asco | 16 | 19 | 18 | 16 | 69 | GCA_900290415.1 | IED                                                      |
| 834 | <i>Westerdykella ornata</i>        | Dothideo | Asco | 15 | 21 | 18 | 15 | 69 | GCA_010094085.1 | DOE Joint Genome Institute                               |
| 835 | <i>Neurospora sp. FGSC 26624</i>   | Sordario | Asco | 14 | 22 | 18 | 15 | 69 | GCA_009805485.1 | University of California, Berkeley                       |
| 836 | <i>Monilinia fructigena</i>        | Leotio   | Asco | 13 | 30 | 11 | 15 | 69 | GCA_003260565.1 | Rita Milvia De Miccolis Angelini's shared submissions    |
| 837 | <i>Penicillium solitum</i>         | Eurotio  | Asco | 13 | 28 | 14 | 13 | 68 | GCA_000952775.2 | JCVI                                                     |
| 838 | <i>Penicillium polonicum</i>       | Eurotio  | Asco | 13 | 28 | 14 | 13 | 68 | GCA_013466175.1 | National Institute of Agricultural Sciences, RDA         |
| 839 | <i>Penicillium sp. BW_MB</i>       | Eurotio  | Asco | 13 | 27 | 14 | 14 | 68 | GCA_008931935.1 | Tufts University                                         |
| 840 | <i>Penicillium freii</i>           | Eurotio  | Asco | 13 | 28 | 15 | 12 | 68 | GCA_001513925.1 | Agriculture and Agri-Food Canada                         |
| 841 | <i>Coniella vitis</i>              | Sordario | Asco | 11 | 31 | 14 | 12 | 68 | GCA_011317545.1 | qingdao agricultural university                          |
| 842 | <i>Penicillium camemberti</i>      | Eurotio  | Asco | 12 | 29 | 14 | 13 | 68 | GCA_000513335.1 | INRA-LIPM                                                |
| 843 | <i>Raffaelea ambrosiae</i>         | Sordario | Asco | 16 | 22 | 16 | 14 | 68 | GCA_002778195.1 | University of Montana                                    |
| 844 | <i>Neurospora sp. FGSC 26638</i>   | Sordario | Asco | 13 | 22 | 19 | 14 | 68 | GCA_009804825.1 | University of California, Berkeley                       |



|     |                                       |          |         |    |    |    |    |    |                 |                                                            |
|-----|---------------------------------------|----------|---------|----|----|----|----|----|-----------------|------------------------------------------------------------|
| 845 | <i>Neurospora sp. FGSC 6877</i>       | Sordario | Asco    | 13 | 24 | 18 | 13 | 68 | GCA_009805295.1 | University of California, Berkeley                         |
| 846 | <i>Peniophora sp. CBMAI 1063</i>      | Agarico  | Basidio | 14 | 22 | 17 | 15 | 68 | GCA_900536885.1 | LABORATORIO NACIONAL DE CIENCIA E TECNOLOGIA DO BI         |
| 847 | <i>Penicillium oxalicum</i>           | Eurotio  | Asco    | 12 | 29 | 17 | 10 | 68 | GCA_005546515.1 | Nanyang Technological University                           |
| 848 | <i>Sclerotinia borealis</i>           | Leotio   | Asco    | 13 | 30 | 11 | 14 | 68 | GCA_000503235.1 | Centre Bioengineering RAS                                  |
| 849 | <i>Neurospora cerealis</i>            | Sordario | Asco    | 15 | 21 | 16 | 16 | 68 | GCA_009806135.1 | University of California, Berkeley                         |
| 850 | <i>Venturia asperata</i>              | Dothideo | Asco    | 14 | 29 | 11 | 14 | 68 | GCA_003689065.1 | INRA                                                       |
| 851 | <i>Neurospora sp. FGSC 26623</i>      | Sordario | Asco    | 14 | 22 | 18 | 14 | 68 | GCA_009805935.1 | University of California, Berkeley                         |
| 852 | <i>Aspergillus ibericus</i>           | Eurotio  | Asco    | 13 | 30 | 10 | 15 | 68 | GCA_003184845.1 | DOE Joint Genome Institute                                 |
| 853 | <i>Punctularia strigosozonata</i>     | Agarico  | Basidio | 13 | 25 | 14 | 16 | 68 | GCA_000264995.1 | JGI                                                        |
| 854 | <i>Madurella mycetomatis</i>          | Sordario | Asco    | 15 | 21 | 20 | 12 | 68 | GCA_001275765.2 | ErasmusMC                                                  |
| 855 | <i>Neurospora sublineolata</i>        | Sordario | Asco    | 14 | 22 | 18 | 14 | 68 | GCA_000604185.2 | EBC                                                        |
| 856 | <i>Fusarium domesticum</i>            | Sordario | Asco    | 12 | 33 | 11 | 12 | 68 | GCA_013618395.1 | US Department of Agriculture, Agriculture Research Service |
| 857 | <i>Morchella crassipes</i>            | Pezizo   | Asco    | 16 | 28 | 12 | 12 | 68 | GCA_009192285.1 | Huazhong Agricultural University                           |
| 858 | <i>Phyllosticta citriasiana</i>       | Dothideo | Asco    | 13 | 28 | 10 | 17 | 68 | GCA_009193405.1 | Zhejiang University                                        |
| 859 | <i>Pallidocercospora crystallina</i>  | Dothideo | Asco    | 11 | 30 | 12 | 14 | 67 | GCA_003666085.1 | Xijing Hospital, Fourth Military Medical University        |
| 860 | <i>Pseudocercospora musae</i>         | Dothideo | Asco    | 11 | 30 | 13 | 13 | 67 | GCA_001578225.1 | University of California Davis                             |
| 861 | <i>Ramularia coccinea</i>             | Dothideo | Asco    | 16 | 19 | 21 | 11 | 67 | GCA_013461505.1 | Yancheng Institute of Technology                           |
| 862 | <i>Acidomyces sp. 'richmondensis'</i> | Dothideo | Asco    | 13 | 26 | 16 | 12 | 67 | GCA_003545705.1 | University of Massachusetts                                |
| 863 | <i>Aspergillus ellipticus</i>         | Eurotio  | Asco    | 13 | 33 | 9  | 12 | 67 | GCA_003184645.1 | DOE Joint Genome Institute                                 |
| 864 | <i>Venturia inaequalis</i>            | Dothideo | Asco    | 13 | 29 | 10 | 15 | 67 | GCA_003689225.1 | INRA                                                       |
| 865 | <i>Mycosphaerelloides madeirae</i>    | Dothideo | Asco    | 13 | 27 | 12 | 15 | 67 | GCA_002785995.1 | Northwest A&F University                                   |
| 866 | <i>Neurospora sp. FGSC 26625</i>      | Sordario | Asco    | 13 | 22 | 18 | 14 | 67 | GCA_009805435.1 | University of California, Berkeley                         |
| 867 | <i>Neurospora sp. CHS-2018a</i>       | Sordario | Asco    | 14 | 20 | 18 | 15 | 67 | GCA_009802375.1 | University of California, Berkeley                         |
| 868 | <i>Psilocybe cf. subviscida</i>       | Agarico  | Basidio | 12 | 22 | 20 | 13 | 67 | GCA_013368295.1 | Lund University                                            |

|     |                                    |          |         |    |    |    |    |    |                 |                                                                                                                                                   |
|-----|------------------------------------|----------|---------|----|----|----|----|----|-----------------|---------------------------------------------------------------------------------------------------------------------------------------------------|
| 869 | <i>Cylindrobasidium torrendii</i>  | Agarico  | Basidio | 14 | 27 | 15 | 11 | 67 | GCA_000934385.1 | DOE Joint Genome Institute                                                                                                                        |
| 870 | <i>Diplocarpon rosae</i>           | Leotio   | Asco    | 12 | 29 | 12 | 14 | 67 | GCA_002317995.1 | Leibniz Universitaet Hannover                                                                                                                     |
| 871 | <i>Phyllosticta citricarpa</i>     | Dothideo | Asco    | 12 | 29 | 10 | 16 | 67 | GCA_000382785.1 | Zhejiang university                                                                                                                               |
| 872 | <i>Basipetospora chlamydospora</i> | Eurotio  | Asco    | 16 | 15 | 21 | 15 | 67 | GCA_001599675.1 | RIKEN Center for Life Science Technologies, Division of Genomic Technologies                                                                      |
| 873 | <i>Mycena citricolor</i>           | Agarico  | Basidio | 12 | 24 | 12 | 18 | 66 | GCA_003987915.1 | Universidade de Sao Paulo                                                                                                                         |
| 874 | <i>Penicillium sp. MA 6040</i>     | Eurotio  | Asco    | 12 | 28 | 15 | 11 | 66 | GCA_003138025.1 | University of Natural Resources and Life Sciences, Vienna                                                                                         |
| 875 | <i>Penicillium rubens</i>          | Eurotio  | Asco    | 12 | 28 | 15 | 11 | 66 | GCA_902636305.1 | IMPERIAL COLLEGE LONDON                                                                                                                           |
| 876 | <i>Penicillium vulpinum</i>        | Eurotio  | Asco    | 13 | 24 | 15 | 14 | 66 | GCA_002072255.1 | Chalmers University of Technology                                                                                                                 |
| 877 | <i>Penicillium chrysogenum</i>     | Eurotio  | Asco    | 12 | 28 | 15 | 11 | 66 | GCA_000710275.1 | Ruhr-Universitaet Bochum                                                                                                                          |
| 878 | <i>Penicillium sp. HKF2</i>        | Eurotio  | Asco    | 12 | 28 | 15 | 11 | 66 | GCA_002000375.1 | CSIR-NEERI                                                                                                                                        |
| 879 | <i>Crepidotus sp. BD-2015</i>      | Agarico  | Basidio | 11 | 19 | 19 | 17 | 66 | GCA_001179765.1 | Royal Botanic Gardens, Kew                                                                                                                        |
| 880 | <i>Cyanoderrella asteris</i>       | Lecanoro | Asco    | 14 | 25 | 14 | 13 | 66 | GCA_900618795.1 | CEBITEC                                                                                                                                           |
| 881 | <i>Trichothecium ovalisporum</i>   | Sordario | Asco    | 15 | 18 | 21 | 12 | 66 | GCA_003012195.1 | USDA, ARS, NCAUR                                                                                                                                  |
| 882 | <i>Dothistroma pini</i>            | Dothideo | Asco    | 12 | 25 | 14 | 15 | 66 | GCA_002116355.1 | Canada's Michael Smith Genome Sciences Centre                                                                                                     |
| 883 | <i>Dothidotthia symphoricarpi</i>  | Dothideo | Asco    | 12 | 30 | 11 | 13 | 66 | GCA_010015815.1 | DOE Joint Genome Institute                                                                                                                        |
| 884 | <i>Venturia carpophila</i>         | Dothideo | Asco    | 14 | 28 | 10 | 14 | 66 | GCA_001990985.1 | USDA-ARS                                                                                                                                          |
| 885 | <i>Scedosporium boydii</i>         | Sordario | Asco    | 14 | 21 | 17 | 14 | 66 | GCA_002221725.1 | GEIHP, UPRES EA 3142                                                                                                                              |
| 886 | <i>Sporothrix schenckii</i>        | Sordario | Asco    | 14 | 23 | 17 | 12 | 66 | GCA_000961545.1 | LNCC                                                                                                                                              |
| 887 | <i>Sporothrix brasiliensis</i>     | Sordario | Asco    | 14 | 22 | 18 | 12 | 66 | GCA_000820605.1 | LNCC                                                                                                                                              |
| 888 | <i>Penicillium sp. CF05</i>        | Eurotio  | Asco    | 13 | 27 | 14 | 11 | 65 | GCA_002916455.1 | INAIL-Research Area                                                                                                                               |
| 889 | <i>Penicillium nalgiovense</i>     | Eurotio  | Asco    | 13 | 27 | 14 | 11 | 65 | GCA_000577395.2 | INRA-LIPM                                                                                                                                         |
| 890 | <i>Arthrotrrys entomopaga</i>      | Orbilio  | Asco    | 12 | 23 | 18 | 12 | 65 | GCA_012184315.1 | Laboratory for Conservation and Utilization of Bio-Resources and Key Laboratory for Microbial Diversity in Southwest China, Ministry of Education |
| 891 | <i>Hypoxylon fragiforme</i>        | Sordario | Asco    | 13 | 22 | 16 | 14 | 65 | GCA_902806515.1 | CEBITEC                                                                                                                                           |

|     |                                 |          |         |    |    |    |    |    |                 |                                                                              |
|-----|---------------------------------|----------|---------|----|----|----|----|----|-----------------|------------------------------------------------------------------------------|
| 892 | <i>Neurospora sp. CHS-2018c</i> | Sordario | Asco    | 13 | 21 | 17 | 14 | 65 | GCA_009806235.1 | University of California, Berkeley                                           |
| 893 | <i>Friedmanniomyces simplex</i> | Dothideo | Asco    | 14 | 21 | 17 | 13 | 65 | GCA_005059865.1 | University of California, Riverside                                          |
| 894 | <i>Scedosporium apiospermum</i> | Sordario | Asco    | 16 | 19 | 16 | 14 | 65 | GCA_000732125.1 | LUNAM - Angers University                                                    |
| 895 | <i>Arthrobotrys oligospora</i>  | Orbilio  | Asco    | 12 | 25 | 17 | 11 | 65 | GCA_004768765.1 | Academia Sinica                                                              |
| 896 | <i>Arthrobotrys flagrans</i>    | Orbilio  | Asco    | 12 | 24 | 16 | 13 | 65 | GCA_004000055.1 | Institute for Applied Biosciences                                            |
| 897 | <i>Panaeolus cyanescens</i>     | Agarico  | Basidio | 12 | 19 | 21 | 13 | 65 | GCA_002938355.1 | Ohio State University                                                        |
| 898 | <i>Rhizodiscina lignyota</i>    | Dothideo | Asco    | 11 | 30 | 12 | 11 | 64 | GCA_010015805.1 | DOE Joint Genome Institute                                                   |
| 899 | <i>Xenoacremonium recifei</i>   | Sordario | Asco    | 12 | 28 | 13 | 11 | 64 | GCA_012184525.1 | Belgian Coordinated Collection of Microorganisms, BCCM                       |
| 900 | <i>Neurospora terricola</i>     | Sordario | Asco    | 13 | 21 | 18 | 12 | 64 | GCA_009805285.1 | University of California, Berkeley                                           |
| 901 | <i>Neurospora tetraspora</i>    | Sordario | Asco    | 13 | 20 | 17 | 14 | 64 | GCA_009806155.1 | University of California, Berkeley                                           |
| 902 | <i>Patellaria atrata</i>        | Dothideo | Asco    | 13 | 20 | 16 | 15 | 64 | GCA_010093705.1 | DOE Joint Genome Institute                                                   |
| 903 | <i>Auriculariopsis ampla</i>    | Agarico  | Basidio | 14 | 24 | 13 | 13 | 64 | GCA_007026445.1 | DOE Joint Genome Institute                                                   |
| 904 | <i>Blumeriella jaapii</i>       | Leotio   | Asco    | 14 | 26 | 11 | 13 | 64 | GCA_009599575.1 | Michigan State University                                                    |
| 905 | <i>Venturia effusa</i>          | Dothideo | Asco    | 12 | 27 | 11 | 14 | 64 | GCA_001901625.1 | USDA-ARS                                                                     |
| 906 | <i>Marssonina coronariae</i>    | Leotio   | Asco    | 12 | 28 | 9  | 15 | 64 | GCA_002204255.1 | Nanjing Forestry University                                                  |
| 907 | <i>Marssonina rosae</i>         | Leotio   | Asco    | 12 | 28 | 10 | 14 | 64 | GCA_011750715.1 | Nanjing Forestry University                                                  |
| 908 | <i>Trichoderma koningiopsis</i> | Sordario | Asco    | 11 | 23 | 19 | 10 | 63 | GCA_002246955.1 | INBIOMIS                                                                     |
| 909 | <i>Trichoderma erinaceum</i>    | Sordario | Asco    | 11 | 23 | 19 | 10 | 63 | GCA_013365115.1 | None                                                                         |
| 910 | <i>Trichoderma atroviride</i>   | Sordario | Asco    | 11 | 23 | 19 | 10 | 63 | GCA_001599035.1 | RIKEN Center for Life Science Technologies, Division of Genomic Technologies |
| 911 | <i>Acronium chrysogenum</i>     | Sordario | Asco    | 15 | 21 | 16 | 11 | 63 | GCA_000769265.1 | Ruhr-Universitaet Bochum                                                     |
| 912 | <i>Mycosphaerella arachidis</i> | Dothideo | Asco    | 13 | 25 | 10 | 15 | 63 | GCA_001297265.1 | USDA                                                                         |
| 913 | <i>Cercospora zeina</i>         | Dothideo | Asco    | 11 | 25 | 14 | 13 | 63 | GCA_002844615.1 | University of Pretoria                                                       |
| 914 | <i>Sordaria macrospora</i>      | Sordario | Asco    | 14 | 20 | 15 | 14 | 63 | GCA_008692325.1 | Ruhr-University Bochum                                                       |
| 915 | <i>Hyphodiscus sp. D1413</i>    | Leotio   | Asco    | 11 | 25 | 14 | 13 | 63 | GCA_003988895.1 | Manaaki Whenua Landcare Research                                             |
| 916 | <i>Stereum hirsutum</i>         | Agarico  | Basidio | 13 | 22 | 13 | 15 | 63 | GCA_000264905.1 | JGI                                                                          |

|     |                                     |          |         |    |    |    |    |    |                 |                                                                                                                                                   |
|-----|-------------------------------------|----------|---------|----|----|----|----|----|-----------------|---------------------------------------------------------------------------------------------------------------------------------------------------|
| 917 | <i>Neurospora crassa</i>            | Sordario | Asco    | 12 | 23 | 15 | 13 | 63 | GCA_007478085.1 | Ronin Genetics                                                                                                                                    |
| 918 | <i>Tothia fuscella</i>              | Dothideo | Asco    | 13 | 26 | 11 | 13 | 63 | GCA_010583015.1 | DOE Joint Genome Institute                                                                                                                        |
| 919 | <i>Dactylella cylindrospora</i>     | Orbilio  | Asco    | 12 | 24 | 14 | 13 | 63 | GCA_012184295.1 | Laboratory for Conservation and Utilization of Bio-Resources and Key Laboratory for Microbial Diversity in Southwest China, Ministry of Education |
| 920 | <i>Pterula gracilis</i>             | Agarico  | Basidio | 15 | 19 | 14 | 15 | 63 | GCA_004369125.1 | DOE Joint Genome Institute                                                                                                                        |
| 921 | <i>Pleurotus salmoneostramineus</i> | Agarico  | Basidio | 14 | 21 | 13 | 15 | 63 | GCA_002933715.1 | Applied Bioscience, Kindai University, Faculty of Agriculture                                                                                     |
| 922 | <i>Sphaerobolus stellatus</i>       | Agarico  | Basidio | 13 | 14 | 18 | 18 | 63 | GCA_000827215.1 | DOE Joint Genome Institute                                                                                                                        |
| 923 | <i>Epichloe glyceriae</i>           | Sordario | Asco    | 11 | 22 | 19 | 10 | 62 | GCA_000225285.2 | University of Kentucky, Dept of Plant Pathology                                                                                                   |
| 924 | <i>Trichoderma hamatum</i>          | Sordario | Asco    | 11 | 23 | 18 | 10 | 62 | GCA_000331835.2 | University of Exeter                                                                                                                              |
| 925 | <i>Trichoderma gamsii</i>           | Sordario | Asco    | 11 | 22 | 19 | 10 | 62 | GCA_002894205.1 | CSIRO                                                                                                                                             |
| 926 | <i>Talaromyces borbonicus</i>       | Eurotio  | Asco    | 9  | 24 | 20 | 9  | 62 | GCA_002916415.1 | University of Naples "Federico II"                                                                                                                |
| 927 | <i>Penicillium griseofulvum</i>     | Eurotio  | Asco    | 13 | 22 | 15 | 12 | 62 | GCA_001561935.1 | University of Turin                                                                                                                               |
| 928 | <i>Scytalidium lignicola</i>        | Leotio   | Asco    | 12 | 22 | 16 | 12 | 62 | GCA_002812745.2 | IHI Zittau / TU Dresden                                                                                                                           |
| 929 | <i>Scedosporium dehoogii</i>        | Sordario | Asco    | 14 | 18 | 16 | 14 | 62 | GCA_002812735.1 | GEIHP, UPRES EA 3142                                                                                                                              |
| 930 | <i>Scedosporium sp. IMV 00882</i>   | Sordario | Asco    | 14 | 18 | 16 | 14 | 62 | GCA_001931805.1 | Jet Propulsion Laboratory, California Institute of Technology                                                                                     |
| 931 | <i>Neurospora tetrasperma</i>       | Sordario | Asco    | 12 | 22 | 15 | 13 | 62 | GCA_000213195.1 | US DOE Joint Genome Institute (JGI-PGF)                                                                                                           |
| 932 | <i>Corioloopsis trogii</i>          | Agarico  | Basidio | 15 | 20 | 10 | 17 | 62 | GCA_007896425.1 | Kunming University of Science and Technology                                                                                                      |
| 933 | <i>Neurospora sp. CHS-2018b</i>     | Sordario | Asco    | 13 | 19 | 17 | 13 | 62 | GCA_009806015.1 | University of California, Berkeley                                                                                                                |
| 934 | <i>Aspergillus sclerotialis</i>     | Eurotio  | Asco    | 11 | 23 | 15 | 12 | 61 | GCA_003589665.1 | University of Natural Resources and Life Sciences, Vienna                                                                                         |
| 935 | <i>Mycosphaerella populi</i>        | Dothideo | Asco    | 12 | 24 | 12 | 13 | 61 | GCA_002153405.1 | Canada's Michael Smith Genome Sciences Centre                                                                                                     |
| 936 | <i>Talaromyces piceae</i>           | Eurotio  | Asco    | 10 | 23 | 16 | 12 | 61 | GCA_001657655.1 | Tianjin Institute of Biotechnology, CAS                                                                                                           |

|     |                                      |          |         |    |    |    |    |    |                 |                                                                                                                                                                         |
|-----|--------------------------------------|----------|---------|----|----|----|----|----|-----------------|-------------------------------------------------------------------------------------------------------------------------------------------------------------------------|
| 937 | <i>Rachicladosporium antarcticum</i> | Dothideo | Asco    | 13 | 17 | 18 | 13 | 61 | GCA_002077065.1 | University of California,<br>Riverside                                                                                                                                  |
| 938 | <i>Polytolypa hystricis</i>          | Eurotio  | Asco    | 14 | 18 | 17 | 12 | 61 | GCA_002573605.1 | Broad Institute                                                                                                                                                         |
| 939 | <i>Fragosphaeria purpurea</i>        | Sordario | Asco    | 15 | 18 | 15 | 13 | 61 | GCA_002778095.1 | University of Montana                                                                                                                                                   |
| 940 | <i>Polyporus brumalis</i>            | Agarico  | Basidio | 13 | 20 | 12 | 16 | 61 | GCA_001792895.1 | National Institute of<br>Forest Science                                                                                                                                 |
| 941 | <i>Raffaelea lauricola</i>           | Sordario | Asco    | 14 | 21 | 13 | 13 | 61 | GCA_014183025.1 | University of Florida                                                                                                                                                   |
| 942 | <i>Polyporus arcularius</i>          | Agarico  | Basidio | 13 | 20 | 12 | 16 | 61 | GCA_004369055.1 | DOE Joint Genome<br>Institute                                                                                                                                           |
| 943 | <i>Dictyopanus pusillus</i>          | Agarico  | Basidio | 13 | 16 | 17 | 15 | 61 | GCA_013387415.1 | INRS-Institut Armand-<br>Frappier                                                                                                                                       |
| 944 | <i>Baeospora myosura</i>             | Agarico  | Basidio | 13 | 19 | 13 | 16 | 61 | GCA_001179705.1 | Royal Botanic Gardens,<br>Kew                                                                                                                                           |
| 945 | <i>Grammothele lineata</i>           | Agarico  | Basidio | 13 | 20 | 13 | 15 | 61 | GCA_002150815.3 | Molecular Biology Lab<br>RIKEN Center for Life<br>Science Technologies,<br>Division of Genomic<br>Technologies                                                          |
| 946 | <i>Aspergillus chevalieri</i>        | Eurotio  | Asco    | 13 | 22 | 12 | 14 | 61 | GCA_001599875.1 | University of Kentucky,<br>Dept of Plant Pathology                                                                                                                      |
| 947 | <i>Periglandula ipomoeae</i>         | Sordario | Asco    | 11 | 22 | 16 | 11 | 60 | GCA_000222875.2 | Canada's Michael Smith<br>Genome Sciences Centre                                                                                                                        |
| 948 | <i>Ramularia endophylla</i>          | Dothideo | Asco    | 12 | 26 | 11 | 11 | 60 | GCA_002116395.1 | J. Craig Venter Institute                                                                                                                                               |
| 949 | <i>Aspergillus clavatus</i>          | Eurotio  | Asco    | 13 | 20 | 16 | 11 | 60 | GCA_000002715.1 | University of Montana                                                                                                                                                   |
| 950 | <i>Esteya vermicola</i>              | Sordario | Asco    | 14 | 18 | 15 | 13 | 60 | GCA_002778215.1 | University of California,<br>Berkeley                                                                                                                                   |
| 951 | <i>Neurospora discreta</i>           | Sordario | Asco    | 12 | 21 | 15 | 12 | 60 | GCA_009805215.1 | National Agriculture and<br>Food Research<br>Organization                                                                                                               |
| 952 | <i>Dicyma pulvinata</i>              | Sordario | Asco    | 14 | 24 | 12 | 10 | 60 | GCA_006538405.1 | University of Montana                                                                                                                                                   |
| 953 | <i>Raffaelea sp. RL272</i>           | Sordario | Asco    | 13 | 22 | 11 | 14 | 60 | GCA_002777955.1 | Universidad de Antioquia                                                                                                                                                |
| 954 | <i>Aspergillus tritici</i>           | Eurotio  | Asco    | 15 | 19 | 13 | 13 | 60 | GCA_009812425.1 | University of Pretoria                                                                                                                                                  |
| 955 | <i>Teratosphaeria gauchensis</i>     | Dothideo | Asco    | 12 | 25 | 10 | 13 | 60 | GCA_007113925.1 | Stanford University                                                                                                                                                     |
| 956 | <i>Arthonia radiata</i>              | Arthonio | Asco    | 11 | 22 | 17 | 10 | 60 | GCA_002989075.1 | Lund University                                                                                                                                                         |
| 957 | <i>Tricholomella constricta</i>      | Agarico  | Basidio | 13 | 21 | 11 | 15 | 60 | GCA_013368375.1 | DOE Joint Genome<br>Institute                                                                                                                                           |
| 958 | <i>Aspergillus heteromorphus</i>     | Eurotio  | Asco    | 13 | 27 | 8  | 12 | 60 | GCA_003184545.1 | Laboratory for<br>Conservation and<br>Utilization of Bio-<br>Resources and Key<br>Laboratory for Microbial<br>Diversity in Southwest<br>China, Ministry of<br>Education |
| 959 | <i>Drechlerella brochopaga</i>       | Orbilio  | Asco    | 11 | 22 | 15 | 12 | 60 | GCA_012184305.1 |                                                                                                                                                                         |

|     |                                         |          |         |    |    |    |    |    |                 |                                                                            |
|-----|-----------------------------------------|----------|---------|----|----|----|----|----|-----------------|----------------------------------------------------------------------------|
| 960 | <i>Phyllachora maydis</i>               | Sordario | Asco    | 13 | 20 | 13 | 14 | 60 | GCA_011801745.1 | Purdue University,<br>Botany and Plant<br>Pathology                        |
| 961 | <i>Armillaria borealis</i>              | Agarico  | Basidio | 12 | 19 | 13 | 16 | 60 | GCA_013427175.2 | Genome Research and<br>Education Center,<br>Siberian Federal<br>University |
| 962 | <i>Armillaria ostoyae</i>               | Agarico  | Basidio | 12 | 22 | 12 | 14 | 60 | GCA_900157425.1 | Technische Universitat<br>Munchen - WZW                                    |
| 963 | <i>Trichoderma atrobrunneum</i>         | Sordario | Asco    | 13 | 18 | 17 | 11 | 59 | GCA_003439915.1 | Institute of Sciences of<br>Food Production (ISPA)                         |
| 964 | <i>Trichoderma guizhouense</i>          | Sordario | Asco    | 13 | 18 | 17 | 11 | 59 | GCA_002022785.1 | Nanjing Agricultural<br>University                                         |
| 965 | <i>Rachicladosporium sp. CCFEE 5018</i> | Dothideo | Asco    | 12 | 17 | 18 | 12 | 59 | GCA_002077045.2 | University of California,<br>Riverside                                     |
| 966 | <i>Aspergillus saccharolyticus</i>      | Eurotio  | Asco    | 13 | 24 | 9  | 13 | 59 | GCA_003184585.1 | DOE Joint Genome<br>Institute                                              |
| 967 | <i>Lophium mytilinum</i>                | Dothideo | Asco    | 14 | 18 | 12 | 15 | 59 | GCA_010093605.1 | DOE Joint Genome<br>Institute                                              |
| 968 | <i>Ploettnerulaceae sp. D365</i>        | Leotio   | Asco    | 13 | 21 | 11 | 14 | 59 | GCA_003988805.1 | Manaaki Whenua<br>Landcare Research                                        |
| 969 | <i>Teratosphaeria zuluensis</i>         | Dothideo | Asco    | 12 | 24 | 10 | 13 | 59 | GCA_007113905.1 | University of Pretoria                                                     |
| 970 | <i>Pseudophaeomoniella oleicola</i>     | Eurotio  | Asco    | 10 | 27 | 10 | 12 | 59 | GCA_003868215.1 | University of Bari "A.<br>Moro"                                            |
| 971 | <i>Dothistroma septosporum</i>          | Dothideo | Asco    | 12 | 19 | 14 | 14 | 59 | GCA_002236755.2 | Massey University                                                          |
| 972 | <i>Talaromyces marneffeii</i>           | Eurotio  | Asco    | 10 | 24 | 14 | 11 | 59 | GCA_009650675.1 | Broad Institute                                                            |
| 973 | <i>Sporothrix insectorum</i>            | Sordario | Asco    | 14 | 17 | 15 | 13 | 59 | GCA_001636815.1 | Shanghai Institutes for<br>Biological Sciences, CAS                        |
| 974 | <i>Amesia nigricolor</i>                | Sordario | Asco    | 14 | 17 | 14 | 14 | 59 | GCA_004802645.1 | Qingdao University                                                         |
| 975 | <i>Sporormia fimetaria</i>              | Dothideo | Asco    | 14 | 14 | 19 | 12 | 59 | GCA_010093795.1 | DOE Joint Genome<br>Institute                                              |
| 976 | <i>Aeminium ludgeri</i>                 | Dothideo | Asco    | 14 | 24 | 11 | 10 | 59 | GCA_004216415.1 | Centre for Functional<br>Diversity                                         |
| 977 | <i>Dendrothele bispora</i>              | Agarico  | Basidio | 15 | 18 | 11 | 15 | 59 | GCA_004369135.1 | DOE Joint Genome<br>Institute                                              |
| 978 | <i>Armillaria solidipes</i>             | Agarico  | Basidio | 12 | 19 | 12 | 16 | 59 | GCA_002307675.1 | DOE Joint Genome<br>Institute                                              |
| 979 | <i>Trichoderma asperellum</i>           | Sordario | Asco    | 11 | 19 | 18 | 10 | 58 | GCA_013423425.1 | Chubu university                                                           |
| 980 | <i>Trichoderma harzianum</i>            | Sordario | Asco    | 13 | 17 | 17 | 11 | 58 | GCA_010015525.1 | The University of<br>Adelaide                                              |
| 981 | <i>Nothophaeocryptopus gaeumannii</i>   | Dothideo | Asco    | 11 | 27 | 6  | 14 | 58 | GCA_002116385.1 | Canada's Michael Smith<br>Genome Sciences Centre                           |
| 982 | <i>Penicillium coprophilum</i>          | Eurotio  | Asco    | 12 | 19 | 15 | 12 | 58 | GCA_002072405.1 | Chalmers University of<br>Technology                                       |

|      |                                   |          |         |    |    |    |    |    |                 |                                                         |
|------|-----------------------------------|----------|---------|----|----|----|----|----|-----------------|---------------------------------------------------------|
| 983  | <i>Trametes villosa</i>           | Agarico  | Basidio | 13 | 16 | 13 | 16 | 58 | GCA_002964805.1 | Universidade Federal de Minas Gerais                    |
| 984  | <i>Ganoderma tsugae</i>           | Agarico  | Basidio | 12 | 19 | 12 | 15 | 58 | GCA_003057275.1 | Biotechnology and Nuclear Technology Research Institute |
| 985  | <i>Passalora sequoiae</i>         | Dothideo | Asco    | 11 | 23 | 10 | 14 | 58 | GCA_013248845.1 | USDA                                                    |
| 986  | <i>Pseudonectria buxi</i>         | Sordario | Asco    | 13 | 25 | 9  | 11 | 58 | GCA_003693545.1 | USDA-ARS                                                |
| 987  | <i>Tinctoporellus epimiltinus</i> | Agarico  | Basidio | 12 | 20 | 12 | 14 | 58 | GCA_900155495.1 | BIOTECHNOLOGY RESEARCH INSTITUTE                        |
| 988  | <i>Aulographum hederarum</i>      | Dothideo | Asco    | 12 | 22 | 11 | 13 | 58 | GCA_010015705.1 | DOE Joint Genome Institute                              |
| 989  | <i>Microcyclosporella mali</i>    | Dothideo | Asco    | 11 | 21 | 15 | 11 | 58 | GCA_002785985.1 | Northwest A&F University                                |
| 990  | <i>Exutisphaerella laricina</i>   | Dothideo | Asco    | 13 | 19 | 13 | 13 | 58 | GCA_000504385.2 | Canada's Michael Smith Genome Sciences Centre           |
| 991  | <i>Delphinella strobiligena</i>   | Dothideo | Asco    | 11 | 25 | 7  | 15 | 58 | GCA_009982845.1 | DOE Joint Genome Institute                              |
| 992  | <i>Chlorenchocelia torta</i>      | Leotio   | Asco    | 12 | 19 | 14 | 13 | 58 | GCA_003988815.1 | Manaaki Whenua Landcare Research                        |
| 993  | <i>Dichomitus squalens</i>        | Agarico  | Basidio | 12 | 20 | 10 | 16 | 58 | GCA_004307925.1 | DOE Joint Genome Institute                              |
| 994  | <i>Agrocybe cylindracea</i>       | Agarico  | Basidio | 13 | 17 | 14 | 14 | 58 | GCA_013376435.1 | Beijing Institute of Genomics, CAS                      |
| 995  | <i>Trichocladium griseum</i>      | Sordario | Asco    | 14 | 16 | 16 | 12 | 58 | GCA_011316235.1 | Embrapa Agroenergia                                     |
| 996  | <i>Scedosporium aurantiacum</i>   | Sordario | Asco    | 14 | 15 | 15 | 14 | 58 | GCA_000812075.1 | Australian National University                          |
| 997  | <i>Flammulina velutipes</i>       | Agarico  | Basidio | 13 | 17 | 16 | 12 | 58 | GCA_011800155.1 | Fujian Agriculture and Forestry University              |
| 998  | <i>Coprinellus micaceus</i>       | Agarico  | Basidio | 13 | 13 | 17 | 15 | 58 | GCA_004369175.1 | DOE Joint Genome Institute                              |
| 999  | <i>Pleurotus pulmonarius</i>      | Agarico  | Basidio | 13 | 18 | 13 | 14 | 58 | GCA_012980535.1 | Academia Sinica                                         |
| 1000 | <i>Ceratobasidium theobromae</i>  | Agarico  | Basidio | 13 | 22 | 10 | 13 | 58 | GCA_009078325.1 | Beltsville Agricultural Research Center                 |
| 1001 | <i>Armillaria cepistipes</i>      | Agarico  | Basidio | 12 | 19 | 13 | 14 | 58 | GCA_900157415.1 | Technische Universitat Munchen - WZW                    |
| 1002 | <i>Aspergillus cristatus</i>      | Eurotio  | Asco    | 12 | 21 | 12 | 13 | 58 | GCA_001693355.1 | Shandong Freda Pharmaceutical Group Corporation         |
| 1003 | <i>Rhizoctonia solani</i>         | Agarico  | Basidio | 16 | 20 | 7  | 15 | 58 | GCA_001899475.2 | Universiti Kebangsaan Malaysia                          |
| 1004 | <i>Ascobolus immersus</i>         | Pezizo   | Asco    | 14 | 15 | 18 | 11 | 58 | GCA_003788565.2 | DOE Joint Genome Institute                              |
| 1005 | <i>Tulasnella calospora</i>       | Agarico  | Basidio | 12 | 19 | 14 | 13 | 58 | GCA_000827465.1 | DOE Joint Genome Institute                              |

|      |                                    |          |         |    |    |    |    |    |                 |                                                                                                                |
|------|------------------------------------|----------|---------|----|----|----|----|----|-----------------|----------------------------------------------------------------------------------------------------------------|
| 1006 | <i>Armillaria fuscipes</i>         | Agarico  | Basidio | 14 | 16 | 11 | 17 | 58 | GCA_001679825.1 | Forestry and Agricultural<br>Biotechnology Institute,<br>University of Pretoria                                |
| 1007 | <i>Cantharellus appalachiensis</i> | Agarico  | Basidio | 10 | 21 | 18 | 8  | 57 | GCA_003314335.1 | Kunming University of<br>Science and Technology                                                                |
| 1008 | <i>Trichoderma sp. IMV 00454</i>   | Sordario | Asco    | 13 | 17 | 16 | 11 | 57 | GCA_001931985.1 | Jet Propulsion<br>Laboratory, California<br>Institute of Technology                                            |
| 1009 | <i>Penicillium sp. OUCMDZ-019</i>  | Eurotio  | Asco    | 10 | 23 | 12 | 12 | 57 | GCA_011750695.1 | ocean university of China                                                                                      |
| 1010 | <i>[Talaromyces] leycettanus</i>   | Eurotio  | Asco    | 11 | 20 | 16 | 10 | 57 | GCA_000787455.1 | none                                                                                                           |
| 1011 | <i>Aspergillus campestris</i>      | Eurotio  | Asco    | 12 | 19 | 15 | 11 | 57 | GCA_002847485.1 | DOE Joint Genome<br>Institute                                                                                  |
| 1012 | <i>Lentinus tigrinus</i>           | Agarico  | Basidio | 13 | 18 | 11 | 15 | 57 | GCA_003813185.1 | DOE Joint Genome<br>Institute                                                                                  |
| 1013 | <i>Ganoderma boninense</i>         | Agarico  | Basidio | 12 | 17 | 13 | 15 | 57 | GCA_002900995.2 | PT SMART Tbk                                                                                                   |
| 1014 | <i>Teratosphaeria nubilosa</i>     | Dothideo | Asco    | 11 | 24 | 10 | 12 | 57 | GCA_010093825.1 | DOE Joint Genome<br>Institute                                                                                  |
| 1015 | <i>Chlorociboria aeruginascens</i> | Leotio   | Asco    | 12 | 17 | 16 | 12 | 57 | GCA_002276475.2 | IHI Zittau / TU Dresden                                                                                        |
| 1016 | <i>Zymoseptoria pseudotritici</i>  | Dothideo | Asco    | 11 | 23 | 14 | 9  | 57 | GCA_000223685.2 | University of Aarhus,<br>Bioinformatics Research<br>Center                                                     |
| 1017 | <i>Amylostereum areolatum</i>      | Agarico  | Basidio | 13 | 19 | 10 | 15 | 57 | GCA_012932865.1 | Beijing Forestry<br>University                                                                                 |
| 1018 | <i>Ophiostoma piceae</i>           | Sordario | Asco    | 12 | 22 | 12 | 11 | 57 | GCA_000410735.1 | University of British<br>Columbia                                                                              |
| 1019 | <i>Myriangium duriaei</i>          | Dothideo | Asco    | 12 | 21 | 12 | 12 | 57 | GCA_010093895.1 | DOE Joint Genome<br>Institute                                                                                  |
| 1020 | <i>Trametes pubescens</i>          | Agarico  | Basidio | 13 | 17 | 11 | 16 | 57 | GCA_001895945.1 | CBS-KNAW Fungal<br>Biodiversity Centre<br>Institute of the Royal<br>Netherlands Academy of<br>Arts and Science |
| 1021 | <i>Galerina marginata</i>          | Agarico  | Basidio | 12 | 17 | 13 | 15 | 57 | GCA_000697645.1 | DOE Joint Genome<br>Institute                                                                                  |
| 1022 | <i>Agrocybe pediades</i>           | Agarico  | Basidio | 12 | 16 | 15 | 14 | 57 | GCA_013053245.1 | Lund University                                                                                                |
| 1023 | <i>Leucocalocybe mongolica</i>     | Agarico  | Basidio | 13 | 16 | 12 | 16 | 57 | GCA_013420905.1 | Jilin Agricultural<br>University                                                                               |
| 1024 | <i>Trichoderma lentiforme</i>      | Sordario | Asco    | 13 | 16 | 16 | 11 | 56 | GCA_011066345.1 | Embrapa Agroenergia                                                                                            |
| 1025 | <i>Talaromyces atroroseus</i>      | Eurotio  | Asco    | 9  | 24 | 13 | 10 | 56 | GCA_001907595.1 | Technical University of<br>Denmark                                                                             |
| 1026 | <i>Ramularia collo-cygni</i>       | Dothideo | Asco    | 11 | 19 | 13 | 13 | 56 | GCA_900074925.1 | Technische Universitat<br>Munchen - WZW                                                                        |
| 1027 | <i>Ganoderma multipileum</i>       | Agarico  | Basidio | 12 | 18 | 11 | 15 | 56 | GCA_000338015.1 | Ganoderma lucidum<br>Research Consortium                                                                       |



|      |                                         |           |           |    |    |    |    |    |                 |                                                                                             |
|------|-----------------------------------------|-----------|-----------|----|----|----|----|----|-----------------|---------------------------------------------------------------------------------------------|
| 1028 | <i>Aspergillus taichungensis</i>        | Eurotio   | Asco      | 12 | 19 | 14 | 11 | 56 | GCA_002850765.1 | DOE Joint Genome Institute                                                                  |
| 1029 | <i>Mycosphaerella sp. Ston1</i>         | Dothideo  | Asco      | 11 | 23 | 7  | 15 | 56 | GCA_000504405.2 | Canada's Michael Smith Genome Sciences Centre                                               |
| 1030 | <i>Geosmithia putterillii</i>           | Sordario  | Asco      | 12 | 18 | 10 | 16 | 56 | GCA_900188575.1 | UNIVERSITY OF NEW HAMPSHIRE                                                                 |
| 1031 | <i>Hortaea thailandica</i>              | Dothideo  | Asco      | 12 | 24 | 9  | 11 | 56 | GCA_005059885.1 | University of California, Riverside                                                         |
| 1032 | <i>Aspergillus rambellii</i>            | Eurotio   | Asco      | 12 | 21 | 13 | 10 | 56 | GCA_000986645.1 | USDA-ARS-SRRC                                                                               |
| 1033 | <i>Sphaerulina musiva</i>               | Dothideo  | Asco      | 10 | 25 | 7  | 14 | 56 | GCA_000320565.2 | JGI                                                                                         |
| 1034 | <i>Trametes polyzona</i>                | Agarico   | Basidio   | 13 | 16 | 12 | 15 | 56 | GCA_001939255.1 | Universidad Nacional Agraria La Molina, The Institute of Medicinal Plant Development, China |
| 1035 | <i>Ganoderma sinense</i>                | Agarico   | Basidio   | 13 | 16 | 11 | 16 | 56 | GCA_002760635.1 | DOE Joint Genome Institute                                                                  |
| 1036 | <i>Aspergillus coremiiformis</i>        | Eurotio   | Asco      | 11 | 25 | 9  | 11 | 56 | GCA_009193565.1 | The Institute of Medicinal Plant Development                                                |
| 1037 | <i>Ganoderma lucidum</i>                | Agarico   | Basidio   | 12 | 18 | 11 | 15 | 56 | GCA_000271565.1 | none                                                                                        |
| 1038 | <i>Lentinus polychrous</i>              | Agarico   | Basidio   | 12 | 18 | 13 | 13 | 56 | GCA_000787475.1 | DOE Joint Genome Institute                                                                  |
| 1039 | <i>Aspergillus glaucus</i>              | Eurotio   | Asco      | 11 | 23 | 8  | 14 | 56 | GCA_001890805.1 | DTU                                                                                         |
| 1040 | <i>Rhizophlyctis rosea</i>              | Chytridio | Chytridio | 14 | 17 | 14 | 11 | 56 | GCA_002214945.1 | DOE Joint Genome Institute                                                                  |
| 1041 | <i>Fibularhizoctonia sp. CBS 109695</i> | Agarico   | Basidio   | 12 | 15 | 13 | 15 | 55 | GCA_001630335.1 | DSM Bio-based Products & Services B.V.                                                      |
| 1042 | <i>Rasamsonia emersonii</i>             | Eurotio   | Asco      | 10 | 21 | 13 | 11 | 55 | GCA_000968595.1 | University of Pretoria                                                                      |
| 1043 | <i>Teratosphaeria pseudoecalypti</i>    | Dothideo  | Asco      | 11 | 23 | 9  | 12 | 55 | GCA_013403795.1 | Christian-Albrechts University of Kiel                                                      |
| 1044 | <i>Zymoseptoria brevis</i>              | Dothideo  | Asco      | 11 | 21 | 14 | 9  | 55 | GCA_000966595.1 | ETH                                                                                         |
| 1045 | <i>Zymoseptoria tritici</i>             | Dothideo  | Asco      | 11 | 21 | 13 | 10 | 55 | GCA_900184105.1 | DOE Joint Genome Institute                                                                  |
| 1046 | <i>Sodiomyces alkalinus</i>             | Sordario  | Asco      | 13 | 13 | 17 | 12 | 55 | GCA_003711515.1 | DOE Joint Genome Institute                                                                  |
| 1047 | <i>Aspergillus ochraceoroseus</i>       | Eurotio   | Asco      | 12 | 21 | 12 | 10 | 55 | GCA_002846915.2 | DOE Joint Genome Institute                                                                  |
| 1048 | <i>Trametes versicolor</i>              | Agarico   | Basidio   | 13 | 16 | 11 | 15 | 55 | GCA_000271585.1 | JGI                                                                                         |
| 1049 | <i>Trametes sp. AH28-2</i>              | Agarico   | Basidio   | 13 | 16 | 10 | 16 | 55 | GCA_001304625.1 | Anhui University                                                                            |
| 1050 | <i>Mycosphaerella sp. PB-2012b</i>      | Dothideo  | Asco      | 10 | 23 | 8  | 14 | 55 | GCA_002116345.1 | Canada's Michael Smith Genome Sciences Centre                                               |
| 1051 | <i>Moniliophthora rozeri</i>            | Agarico   | Basidio   | 13 | 16 | 12 | 14 | 55 | GCA_001466705.1 | Purdue University                                                                           |
| 1052 | <i>Morchella sp. a71</i>                | Pezizo    | Asco      | 15 | 20 | 9  | 11 | 55 | GCA_013407065.1 | Chongqing Normal University                                                                 |
| 1053 | <i>Coccinonectria pachysandricola</i>   | Sordario  | Asco      | 12 | 23 | 9  | 11 | 55 | GCA_013283235.1 | USDA-ARS                                                                                    |

|      |                                   |          |         |    |    |    |    |    |                 |                                                                                           |
|------|-----------------------------------|----------|---------|----|----|----|----|----|-----------------|-------------------------------------------------------------------------------------------|
| 1054 | <i>Phlebiopsis gigantea</i>       | Agarico  | Basidio | 13 | 14 | 12 | 16 | 55 | GCA_000832265.1 | DOE Joint Genome Institute                                                                |
| 1055 | <i>Heterobasidion irregulare</i>  | Agarico  | Basidio | 12 | 18 | 11 | 14 | 55 | GCA_000320585.2 | JGI                                                                                       |
| 1056 | <i>Chondrostereum purpureum</i>   | Agarico  | Basidio | 13 | 16 | 11 | 15 | 55 | GCA_004354395.1 | Internationales<br>Hochschulinstitut Zittau                                               |
| 1057 | <i>Hydnomerulius pinastri</i>     | Agarico  | Basidio | 15 | 15 | 10 | 15 | 55 | GCA_000827185.1 | DOE Joint Genome Institute                                                                |
| 1058 | <i>Ophiostoma novo-ulmi</i>       | Sordario | Asco    | 13 | 20 | 10 | 12 | 55 | GCA_000317715.1 | Association of<br>Biomolecular Resource<br>Facilities                                     |
| 1059 | <i>Crucibulum laeve</i>           | Agarico  | Basidio | 14 | 14 | 13 | 14 | 55 | GCA_004379715.1 | DOE Joint Genome<br>Institute                                                             |
| 1060 | <i>Gymnopus androsaceus</i>       | Agarico  | Basidio | 10 | 18 | 15 | 12 | 55 | GCA_009733575.1 | DOE Joint Genome<br>Institute                                                             |
| 1061 | <i>Lepista sordida</i>            | Agarico  | Basidio | 12 | 15 | 12 | 16 | 55 | GCA_900168675.1 | UNIVERSITY OF BRISTOL                                                                     |
| 1062 | <i>Porodaedalea pini</i>          | Agarico  | Basidio | 12 | 17 | 11 | 15 | 55 | GCA_002794775.1 | Academia Sinica                                                                           |
| 1063 | <i>Pleurotus tuoliensis</i>       | Agarico  | Basidio | 12 | 17 | 11 | 15 | 55 | GCA_003243755.1 | Northeast Normal<br>University                                                            |
| 1064 | <i>Trichoderma virens</i>         | Sordario | Asco    | 12 | 14 | 17 | 11 | 54 | GCA_001835465.1 | Bhabha Atomic Research<br>Centre                                                          |
| 1065 | <i>Lecanosticta acicola</i>       | Dothideo | Asco    | 11 | 18 | 11 | 14 | 54 | GCA_002441625.1 | Mississippi State<br>University                                                           |
| 1066 | <i>Saccharata proteae</i>         | Dothideo | Asco    | 11 | 23 | 7  | 13 | 54 | GCA_010015785.1 | DOE Joint Genome<br>Institute                                                             |
| 1067 | <i>Pseudonectria foliicola</i>    | Sordario | Asco    | 11 | 24 | 9  | 10 | 54 | GCA_002911195.1 | USDA                                                                                      |
| 1068 | <i>Teratosphaeria destructans</i> | Dothideo | Asco    | 11 | 23 | 9  | 11 | 54 | GCA_010367415.1 | Forestry and Agricultural<br>Biotechnology Institute<br>(FABI), University of<br>Pretoria |
| 1069 | <i>Taxomyces andreanae</i>        | 0        | Asco    | 13 | 15 | 11 | 15 | 54 | GCA_001969225.1 | Fraunhofer                                                                                |
| 1070 | <i>Trametes sanguinea</i>         | Agarico  | Basidio | 13 | 15 | 10 | 16 | 54 | GCA_008973685.1 | School of Bioscience and<br>Technology                                                    |
| 1071 | <i>Trametes coccinea</i>          | Agarico  | Basidio | 13 | 15 | 10 | 16 | 54 | GCA_002092935.1 | DOE Joint Genome<br>Institute                                                             |
| 1072 | <i>Penicillium digitatum</i>      | Eurotio  | Asco    | 11 | 23 | 10 | 10 | 54 | GCA_012295545.1 | Huazhong Agricultural<br>University                                                       |
| 1073 | <i>Trametes hirsuta</i>           | Agarico  | Basidio | 12 | 16 | 12 | 14 | 54 | GCA_001302255.2 | A.N. Bach Institute of<br>Biochemistry                                                    |
| 1074 | <i>Agaricales sp. HM26-F1</i>     | Agarico  | Basidio | 12 | 19 | 10 | 13 | 54 | GCA_002718315.1 | Shanghai Academy of<br>Agricultural Sciences                                              |
| 1075 | <i>Gymnopilus dilepis</i>         | Agarico  | Basidio | 14 | 12 | 14 | 14 | 54 | GCA_002938385.1 | Ohio State University                                                                     |
| 1076 | <i>Pleurotus citrinopileatus</i>  | Agarico  | Basidio | 12 | 16 | 10 | 16 | 54 | GCA_003314595.1 | Kunming University of<br>Science and Technology                                           |

|      |                                    |          |         |    |    |    |    |    |                 |                                                                              |
|------|------------------------------------|----------|---------|----|----|----|----|----|-----------------|------------------------------------------------------------------------------|
| 1077 | <i>Pleurotus eryngii</i>           | Agarico  | Basidio | 12 | 18 | 11 | 13 | 54 | GCA_001717165.1 | Shanghai Academy of Agricultural Sciences                                    |
| 1078 | <i>Lyophyllum shimeji</i>          | Agarico  | Basidio | 13 | 14 | 10 | 16 | 53 | GCA_001950515.1 | RIKEN Center for Life Science Technologies, Division of Genomic Technologies |
| 1079 | <i>Zymoseptoria ardabiliae</i>     | Dothideo | Asco    | 11 | 19 | 13 | 10 | 53 | GCA_000223765.2 | University of Aarhus, Bioinformatics Research Center                         |
| 1080 | <i>Cenococcum geophilum</i>        | Dothideo | Asco    | 13 | 15 | 10 | 15 | 53 | GCA_001692895.1 | DOE Joint Genome Institute                                                   |
| 1081 | <i>Agrocybe aegerita</i>           | Agarico  | Basidio | 12 | 14 | 13 | 14 | 53 | GCA_902728275.1 | Integrative Pilzforschung                                                    |
| 1082 | <i>Lineolata rhizophorae</i>       | Dothideo | Asco    | 14 | 10 | 16 | 13 | 53 | GCA_010093515.1 | DOE Joint Genome Institute                                                   |
| 1083 | <i>Phanerochaete chrysosporium</i> | Agarico  | Basidio | 13 | 12 | 12 | 16 | 53 | GCA_001910725.1 | National Institute of Forest Science                                         |
| 1084 | <i>Fusarium ventricosum</i>        | Sordario | Asco    | 11 | 20 | 10 | 12 | 53 | GCA_013623725.1 | US Department of Agriculture, Agriculture Research Service                   |
| 1085 | <i>Heterobasidion parviporum</i>   | Agarico  | Basidio | 12 | 17 | 10 | 14 | 53 | GCA_002994785.1 | University of Helsinki                                                       |
| 1086 | <i>Trichodelitschia bisporula</i>  | Dothideo | Asco    | 10 | 25 | 8  | 10 | 53 | GCA_010356995.1 | DOE Joint Genome Institute                                                   |
| 1087 | <i>Heterobasidion annosum</i>      | Agarico  | Basidio | 12 | 17 | 10 | 14 | 53 | GCA_000633895.1 | Seoul National University                                                    |
| 1088 | <i>Phanerochaete carnosa</i>       | Agarico  | Basidio | 12 | 12 | 14 | 15 | 53 | GCA_000300595.1 | DOE Joint Genome Institute                                                   |
| 1089 | <i>Pleurotus ostreatus</i>         | Agarico  | Basidio | 11 | 16 | 13 | 13 | 53 | GCA_003313235.2 | Chinese Academy of Agricultural Sciences                                     |
| 1090 | <i>Gymnopus luxurians</i>          | Agarico  | Basidio | 12 | 17 | 11 | 13 | 53 | GCA_000827265.1 | DOE JGI                                                                      |
| 1091 | <i>Leucoagaricus leucothites</i>   | Agarico  | Basidio | 12 | 14 | 12 | 15 | 53 | GCA_013368445.1 | Lund University                                                              |
| 1092 | <i>Trichoderma pleuroti</i>        | Sordario | Asco    | 13 | 13 | 15 | 11 | 52 | GCA_001721665.1 | University of Pecs                                                           |
| 1093 | <i>Ganoderma sp. BRIUMSc</i>       | Agarico  | Basidio | 12 | 16 | 10 | 14 | 52 | GCA_008694245.1 | Universiti Malaysia Sabah                                                    |
| 1094 | <i>Penicillium italicum</i>        | Eurotio  | Asco    | 12 | 21 | 8  | 11 | 52 | GCA_000769765.1 | Center for Genomic Regulation (CRG)                                          |
| 1095 | <i>Lyophyllum decastes</i>         | Agarico  | Basidio | 13 | 16 | 9  | 14 | 52 | GCA_001950495.1 | RIKEN Center for Life Science Technologies, Division of Genomic Technologies |
| 1096 | <i>Hericium coralloides</i>        | Agarico  | Basidio | 12 | 13 | 12 | 15 | 52 | GCA_003675405.1 | Tibet Vocational Technical College                                           |
| 1097 | <i>Trametes cinnabarina</i>        | Agarico  | Basidio | 13 | 14 | 10 | 15 | 52 | GCA_000787515.1 | Aalborg University                                                           |
| 1098 | <i>Coprinellus angulatus</i>       | Agarico  | Basidio | 11 | 11 | 15 | 15 | 52 | GCA_013368325.1 | Lund University                                                              |
| 1099 | <i>Phlebia tremellosa</i>          | Agarico  | Basidio | 14 | 10 | 11 | 17 | 52 | GCA_011032875.1 | Ningxia University                                                           |

|      |                                      |          |         |    |    |    |    |    |                 |                                                                                                        |
|------|--------------------------------------|----------|---------|----|----|----|----|----|-----------------|--------------------------------------------------------------------------------------------------------|
| 1100 | <i>Steccherinum ochraceum</i>        | Agarico  | Basidio | 12 | 13 | 12 | 15 | 52 | GCA_004332605.1 | The Federal Research Centre "Fundamentals of Biotechnology" of the Russian Academy of Sciences         |
| 1101 | <i>Thielaviopsis ethacetica</i>      | Sordario | Asco    | 12 | 17 | 12 | 11 | 52 | GCA_001599055.1 | RIKEN Center for Life Science Technologies, Division of Genomic Technologies                           |
| 1102 | <i>Macrolepiota dolichaula</i>       | Agarico  | Basidio | 12 | 13 | 12 | 15 | 52 | GCA_003315915.1 | Kunming University of Science and Technology                                                           |
| 1103 | <i>Cantharellus cibarius</i>         | Agarico  | Basidio | 8  | 20 | 16 | 7  | 51 | GCA_003521295.1 | Kunming University of Science and Technology Institute of Biology, Shnaodong Academy of Science, China |
| 1104 | <i>Trichoderma viride</i>            | Sordario | Asco    | 11 | 13 | 16 | 11 | 51 | GCA_007896495.1 | The University of Adelaide                                                                             |
| 1105 | <i>Trichoderma sp. TW21990_1</i>     | Sordario | Asco    | 12 | 12 | 16 | 11 | 51 | GCA_010015515.1 | University of California, Riverside                                                                    |
| 1106 | <i>Friedmanniomyces endolithicus</i> | Dothideo | Asco    | 14 | 13 | 14 | 10 | 51 | GCA_005059855.1 | INRA-LIPM                                                                                              |
| 1107 | <i>Penicillium paneum</i>            | Eurotio  | Asco    | 12 | 18 | 10 | 11 | 51 | GCA_000577715.1 | University of Aarhus, Bioinformatics Research Center                                                   |
| 1108 | <i>Zymoseptoria passerinii</i>       | Dothideo | Asco    | 11 | 17 | 13 | 10 | 51 | GCA_000223825.2 | University of Malaya                                                                                   |
| 1109 | <i>Lignosus rhinocerotis</i>         | Agarico  | Basidio | 12 | 14 | 11 | 14 | 51 | GCA_000743315.1 | University of Montana                                                                                  |
| 1110 | <i>Raffaelea quercivora</i>          | Sordario | Asco    | 10 | 20 | 8  | 13 | 51 | GCA_002778125.1 | IHI Zittau / TU Dresden                                                                                |
| 1111 | <i>Dentipellis fragilis</i>          | Agarico  | Basidio | 12 | 14 | 11 | 14 | 51 | GCA_004679275.1 | JGI                                                                                                    |
| 1112 | <i>Baudoinia panamericana</i>        | Dothideo | Asco    | 11 | 16 | 13 | 11 | 51 | GCA_000338955.1 | Anhui university                                                                                       |
| 1113 | <i>Irpex lacteus</i>                 | Agarico  | Basidio | 13 | 13 | 11 | 14 | 51 | GCA_001986395.2 | DOE Joint Genome Institute                                                                             |
| 1114 | <i>Sphaerosporella brunnea</i>       | Pezizo   | Asco    | 14 | 15 | 8  | 14 | 51 | GCA_008704415.1 | University of Montana                                                                                  |
| 1115 | <i>Raffaelea arxii</i>               | Sordario | Asco    | 12 | 16 | 10 | 12 | 50 | GCA_002778165.1 | DOE Joint Genome Institute                                                                             |
| 1116 | <i>Mytilinidion resinicola</i>       | Dothideo | Asco    | 13 | 12 | 10 | 15 | 50 | GCA_010093595.1 | University of Natural Resources and Life Sciences, Vienna                                              |
| 1117 | <i>Aspergillus sp. HF37</i>          | Eurotio  | Asco    | 12 | 16 | 11 | 11 | 50 | GCA_003698115.1 | Jet Propulsion Laboratory, California Institute of Technology                                          |
| 1118 | <i>Thermoascaceae sp. COH1141</i>    | Eurotio  | Asco    | 8  | 20 | 9  | 13 | 50 | GCA_003123655.1 | Amazonian macromicets: knowing their diversity and evaluating their biotechnological                   |
| 1119 | <i>Pleurotus ostreatoroseus</i>      | Agarico  | Basidio | 13 | 14 | 9  | 14 | 50 | GCA_005298045.1 |                                                                                                        |

|      |                                    |          |         |    |    |    |    |    |                 |                                                                              |
|------|------------------------------------|----------|---------|----|----|----|----|----|-----------------|------------------------------------------------------------------------------|
| 1120 | <i>Gloeophyllum trabeum</i>        | Agarico  | Basidio | 11 | 16 | 10 | 13 | 50 | GCA_000344685.1 | potential in a sustainable way                                               |
| 1121 | <i>Gloeostereum incarnatum</i>     | Agarico  | Basidio | 11 | 14 | 10 | 15 | 50 | GCA_010588315.1 | JGI                                                                          |
| 1122 | <i>Stropharia rugosoannulata</i>   | Agarico  | Basidio | 13 | 10 | 12 | 15 | 50 | GCA_003314255.1 | Jilin Agricultural University                                                |
| 1123 | <i>Grosmanina penicillata</i>      | Sordario | Asco    | 10 | 21 | 7  | 12 | 50 | GCA_002778075.1 | Kunming University of Science and Technology                                 |
| 1124 | <i>Obba rivulosa</i>               | Agarico  | Basidio | 12 | 11 | 11 | 16 | 50 | GCA_001687445.1 | University of Montana                                                        |
| 1125 | <i>Hypsizygus marmoreus</i>        | Agarico  | Basidio | 13 | 14 | 10 | 13 | 50 | GCA_013433165.1 | DOE Joint Genome Institute                                                   |
| 1126 | <i>Neonothopanus nambi</i>         | Agarico  | Basidio | 12 | 10 | 12 | 16 | 50 | GCA_003987895.1 | Fujian Agriculture and Forestry University                                   |
| 1127 | <i>Armillaria gallica</i>          | Agarico  | Basidio | 12 | 14 | 10 | 14 | 50 | GCA_012064365.1 | Universidade de Sao Paulo                                                    |
| 1128 | <i>Hypholoma sublateritium</i>     | Agarico  | Basidio | 12 | 10 | 14 | 14 | 50 | GCA_000827495.1 | Yunnan Minzu University                                                      |
| 1129 | <i>Serendipita vermifera</i>       | Agarico  | Basidio | 14 | 14 | 11 | 11 | 50 | GCA_003073295.1 | JGI                                                                          |
| 1130 | <i>Trichoderma arundinaceum</i>    | Sordario | Asco    | 12 | 12 | 15 | 10 | 49 | GCA_003012105.1 | DOE Joint Genome Institute                                                   |
| 1131 | <i>Trichoderma reesei</i>          | Sordario | Asco    | 12 | 10 | 16 | 11 | 49 | GCA_000167675.2 | USDA, ARS, NCAUR                                                             |
| 1132 | <i>Trichoderma longibrachiatum</i> | Sordario | Asco    | 12 | 10 | 15 | 12 | 49 | GCA_000332775.1 | DOE Joint Genome Institute                                                   |
| 1133 | <i>Trichoderma koningii</i>        | Sordario | Asco    | 12 | 10 | 15 | 12 | 49 | GCA_001950475.1 | Shandong University                                                          |
| 1134 | <i>Penicillium roqueforti</i>      | Eurotio  | Asco    | 11 | 19 | 9  | 10 | 49 | GCA_001599855.1 | RIKEN Center for Life Science Technologies, Division of Genomic Technologies |
| 1135 | <i>Dentipellis sp. KUC8613</i>     | Agarico  | Basidio | 12 | 14 | 10 | 13 | 49 | GCA_002286715.1 | RIKEN Center for Life Science Technologies, Division of Genomic Technologies |
| 1136 | <i>Penicillioopsis zonata</i>      | Eurotio  | Asco    | 10 | 19 | 11 | 9  | 49 | GCA_001890105.1 | Korea University                                                             |
| 1137 | <i>Coniophora puteana</i>          | Agarico  | Basidio | 13 | 14 | 8  | 14 | 49 | GCA_000271625.1 | DOE Joint Genome Institute                                                   |
| 1138 | <i>Ochroconis constricta</i>       | Dothideo | Asco    | 12 | 16 | 9  | 12 | 49 | GCA_000611715.1 | DOE Joint Genome Institute                                                   |
| 1139 | <i>Plicaturopsis crispa</i>        | Agarico  | Basidio | 12 | 16 | 6  | 15 | 49 | GCA_000827205.1 | UNIVERSITY OF MALAYA                                                         |
| 1140 | <i>Leptographium lundbergii</i>    | Sordario | Asco    | 10 | 22 | 5  | 12 | 49 | GCA_001455505.1 | DOE Joint Genome Institute                                                   |
| 1141 | <i>Exophiala lecanii-corni</i>     | Eurotio  | Asco    | 10 | 16 | 9  | 14 | 49 | GCA_003955835.1 | University of Pretoria                                                       |
| 1142 | <i>Grifola frondosa</i>            | Agarico  | Basidio | 13 | 12 | 8  | 16 | 49 | GCA_001683735.1 | Naval Research Laboratory                                                    |
| 1143 | <i>Psathyrella aberdarensis</i>    | Agarico  | Basidio | 12 | 7  | 15 | 15 | 49 | GCA_004126415.1 | Korea University                                                             |
|      |                                    |          |         |    |    |    |    |    |                 | IHI Zittau / TU Dresden                                                      |

|      |                                     |          |         |    |    |    |    |    |                 |                                                                                       |
|------|-------------------------------------|----------|---------|----|----|----|----|----|-----------------|---------------------------------------------------------------------------------------|
| 1144 | <i>Thielaviopsis punctulata</i>     | Sordario | Asco    | 11 | 16 | 10 | 12 | 49 | GCA_002925815.1 | Forestry and Agricultural<br>Biotechnology Institute                                  |
| 1145 | <i>Pochonia chlamydosporia</i>      | Sordario | Asco    | 11 | 13 | 12 | 12 | 48 | GCA_001653235.2 | The Institute of<br>Vegetables and Flowers<br>CAAS                                    |
| 1146 | <i>Trichoderma parareesei</i>       | Sordario | Asco    | 11 | 11 | 16 | 10 | 48 | GCA_001050175.1 | Vienna University of<br>Technology                                                    |
| 1147 | <i>Byssochlamys sp. AF001</i>       | Eurotio  | Asco    | 7  | 23 | 9  | 9  | 48 | GCA_002914405.1 | University of Oklahoma                                                                |
| 1148 | <i>Choiromyces venosus</i>          | Pezizo   | Asco    | 12 | 17 | 7  | 12 | 48 | GCA_003788595.2 | DOE Joint Genome<br>Institute                                                         |
| 1149 | <i>Gelatoporia subvermispota</i>    | Agarico  | Basidio | 12 | 11 | 10 | 15 | 48 | GCA_000320605.2 | DOE Joint Genome<br>Institute                                                         |
| 1150 | <i>Pseudogymnoascus destructans</i> | Leotio   | Asco    | 10 | 21 | 8  | 9  | 48 | GCA_001641265.1 | US Forest Service                                                                     |
| 1151 | <i>Verruconis gallopava</i>         | Dothideo | Asco    | 9  | 19 | 7  | 13 | 48 | GCA_000836295.1 | Broad Institute                                                                       |
| 1152 | <i>Thielaviopsis euricoi</i>        | Sordario | Asco    | 10 | 17 | 11 | 10 | 48 | GCA_001599615.1 | RIKEN Center for Life<br>Science Technologies,<br>Division of Genomic<br>Technologies |
| 1153 | <i>Macrocybe gigantea</i>           | Agarico  | Basidio | 11 | 14 | 9  | 14 | 48 | GCA_011319805.1 | Yunnan Agricultural<br>University                                                     |
| 1154 | <i>Leucoagaricus sp. SymC.cos</i>   | Agarico  | Basidio | 11 | 11 | 12 | 14 | 48 | GCA_001563735.1 | BGI                                                                                   |
| 1155 | <i>Bretziella fagacearum</i>        | Sordario | Asco    | 12 | 15 | 9  | 12 | 48 | GCA_002018255.1 | Forestry and Agricultural<br>Biotechnology Institute                                  |
| 1156 | <i>Pleurotus tuber-regium</i>       | Agarico  | Basidio | 13 | 11 | 10 | 14 | 48 | GCA_014058305.1 | Huazhong Agricultural<br>University                                                   |
| 1157 | <i>Termitomyces sp. JCM 13351</i>   | Agarico  | Basidio | 12 | 9  | 12 | 15 | 48 | GCA_001972325.1 | RIKEN Center for Life<br>Science Technologies,<br>Division of Genomic<br>Technologies |
| 1158 | <i>Trichoderma brevicompactum</i>   | Sordario | Asco    | 12 | 11 | 14 | 10 | 47 | GCA_003012085.1 | USDA, ARS, NCAUR                                                                      |
| 1159 | <i>Penicillium carneum</i>          | Eurotio  | Asco    | 11 | 18 | 8  | 10 | 47 | GCA_000577495.1 | INRA-LIPM                                                                             |
| 1160 | <i>Byssochlamys nivea</i>           | Eurotio  | Asco    | 8  | 20 | 9  | 10 | 47 | GCA_003116535.1 | Cornell University                                                                    |
| 1161 | <i>Geosmithia flava</i>             | Sordario | Asco    | 10 | 17 | 7  | 13 | 47 | GCA_900188565.1 | UNIVERSITY OF NEW<br>HAMPSHIRE                                                        |
| 1162 | <i>Hericium erinaceus</i>           | Agarico  | Basidio | 12 | 14 | 7  | 14 | 47 | GCA_006506795.2 | Institute of Bast Fiber<br>Crops, Chinese Academy<br>of Agricultural Sciences         |
| 1163 | <i>Chaetomium thermophilum</i>      | Sordario | Asco    | 11 | 13 | 14 | 9  | 47 | GCA_000221225.1 | EMBL                                                                                  |
| 1164 | <i>Heliocybe sulcata</i>            | Agarico  | Basidio | 9  | 16 | 11 | 11 | 47 | GCA_004369045.1 | DOE Joint Genome<br>Institute                                                         |
| 1165 | <i>Raffaelea quercus-mongolicae</i> | Sordario | Asco    | 10 | 17 | 7  | 13 | 47 | GCA_002215975.1 | Seoul National University                                                             |
| 1166 | <i>Hericium alpestre</i>            | Agarico  | Basidio | 12 | 12 | 8  | 15 | 47 | GCA_004681135.1 | IHI Zittau / TU Dresden                                                               |
| 1167 | <i>Serendipita indica</i>           | Agarico  | Basidio | 12 | 13 | 10 | 12 | 47 | GCA_000313545.1 | Institute of<br>Bioinformatics and                                                    |

|      |                                    |          |         |    |    |    |    |    |                 |                                                                                                                                   |
|------|------------------------------------|----------|---------|----|----|----|----|----|-----------------|-----------------------------------------------------------------------------------------------------------------------------------|
| 1168 | <i>Psilocybe cyanescens</i>        | Agarico  | Basidio | 11 | 9  | 12 | 15 | 47 | GCA_002938375.1 | Systems Biology,<br>Helmholtz Zentrum<br>München, Neuherberg,<br>Germany                                                          |
| 1169 | <i>Mycosphaerella populicola</i>   | Dothideo | Asco    | 8  | 20 | 6  | 12 | 46 | GCA_000291705.1 | Ohio State University<br>University of British<br>Columbia                                                                        |
| 1170 | <i>Saitozyma sp. JCM 24511</i>     | Tremello | Basidio | 5  | 22 | 12 | 7  | 46 | GCA_001600855.1 | RIKEN Center for Life<br>Science Technologies,<br>Division of Genomic<br>Technologies                                             |
| 1171 | <i>Coprinopsis cinerea</i>         | Agarico  | Basidio | 11 | 8  | 15 | 12 | 46 | GCA_000182895.1 | Broad Institute                                                                                                                   |
| 1172 | <i>Pholiota adiposa</i>            | Agarico  | Basidio | 11 | 11 | 11 | 13 | 46 | GCA_009935795.1 | Dezhou University                                                                                                                 |
| 1173 | <i>Ophiostoma ips</i>              | Sordario | Asco    | 8  | 20 | 8  | 10 | 46 | GCA_002917055.1 | University of Pretoria<br>Engineering Research<br>Center of Chinese<br>Ministry of Education for<br>Edible and Medicinal<br>Fungi |
| 1174 | <i>Sarcomyxa edulis</i>            | Agarico  | Basidio | 10 | 14 | 9  | 13 | 46 | GCA_009761415.1 | University of Pretoria<br>Biodiversity Research<br>Center, Academia Sinica                                                        |
| 1175 | <i>Thielaviopsis musarum</i>       | Sordario | Asco    | 12 | 13 | 9  | 12 | 46 | GCA_001513885.1 | Lund University                                                                                                                   |
| 1176 | <i>Coniferiporia sulphurascens</i> | Agarico  | Basidio | 13 | 10 | 9  | 14 | 46 | GCA_002794785.1 | Zhejiang University                                                                                                               |
| 1177 | <i>Gymnopus confluens</i>          | Agarico  | Basidio | 11 | 13 | 9  | 13 | 46 | GCA_013368555.1 | Michael Smith<br>Laboratories at UBC                                                                                              |
| 1178 | <i>Calcarisporium arbuscula</i>    | Sordario | Asco    | 10 | 12 | 12 | 11 | 45 | GCA_009828645.1 | Broad Institute                                                                                                                   |
| 1179 | <i>Grosmannia clavigera</i>        | Sordario | Asco    | 10 | 19 | 4  | 12 | 45 | GCA_000143105.2 | IHI Zittau / TU Dresden                                                                                                           |
| 1180 | <i>Exophiala xenobiotica</i>       | Eurotio  | Asco    | 9  | 14 | 10 | 12 | 45 | GCA_000835505.1 | University of<br>Stellenbosch                                                                                                     |
| 1181 | <i>Bondarzewia mesenterica</i>     | Agarico  | Basidio | 12 | 9  | 7  | 17 | 45 | GCA_004802705.1 | National Institute of<br>Forest Science                                                                                           |
| 1182 | <i>Knoxdaviesia proteae</i>        | Sordario | Asco    | 13 | 7  | 13 | 12 | 45 | GCA_001510565.1 | JGI                                                                                                                               |
| 1183 | <i>Fomitopsis palustris</i>        | Agarico  | Basidio | 10 | 12 | 10 | 13 | 45 | GCA_001937815.1 | Southwest University                                                                                                              |
| 1184 | <i>Botryobasidium botryosum</i>    | Agarico  | Basidio | 14 | 6  | 11 | 14 | 45 | GCA_000697705.1 | DOE Joint Genome<br>Institute                                                                                                     |
| 1185 | <i>Athelia rolfsii</i>             | Agarico  | Basidio | 10 | 16 | 9  | 10 | 45 | GCA_002940785.1 | Harvard University                                                                                                                |
| 1186 | <i>Coprinopsis marcescibilis</i>   | Agarico  | Basidio | 11 | 7  | 13 | 14 | 45 | GCA_004369085.1 | Forestry and Agricultural<br>Biotechnology Institute                                                                              |
| 1187 | <i>Volvariella volvacea</i>        | Agarico  | Basidio | 12 | 9  | 11 | 13 | 45 | GCA_001691835.3 | DOE Joint Genome<br>Institute                                                                                                     |
| 1188 | <i>Berkeleyomyces basicola</i>     | Sordario | Asco    | 11 | 15 | 6  | 13 | 45 | GCA_003671435.1 | JGI                                                                                                                               |
| 1189 | <i>Jaapia argillacea</i>           | Agarico  | Basidio | 14 | 9  | 8  | 14 | 45 | GCA_000697665.1 | Kunming University of<br>Science and Technology                                                                                   |
| 1190 | <i>Fomitiporia mediterranea</i>    | Agarico  | Basidio | 12 | 11 | 6  | 16 | 45 | GCA_000271605.1 |                                                                                                                                   |
| 1191 | <i>Termitomyces sp. MG148</i>      | Agarico  | Basidio | 13 | 10 | 9  | 13 | 45 | GCA_003313785.1 |                                                                                                                                   |

|      |                                      |          |         |    |    |    |    |    |                 |                                                                                                       |
|------|--------------------------------------|----------|---------|----|----|----|----|----|-----------------|-------------------------------------------------------------------------------------------------------|
| 1192 | <i>Simplicillium aogashimaense</i>   | Sordario | Asco    | 11 | 12 | 9  | 12 | 44 | GCA_012273805.1 | AgResearch                                                                                            |
| 1193 | <i>Phialophora attinorum</i>         | Eurotio  | Asco    | 9  | 10 | 12 | 13 | 44 | GCA_001299255.1 | CBS-KNAW Fungal Biodiversity Centre                                                                   |
| 1194 | <i>Cladosporiaceae sp. IMV 00236</i> | Dothideo | Asco    | 7  | 17 | 7  | 13 | 44 | GCA_001931875.2 | Jet Propulsion Laboratory, California Institute of Technology                                         |
| 1195 | <i>Malbranchea cinnamomea</i>        | Eurotio  | Asco    | 10 | 16 | 9  | 9  | 44 | GCA_900128795.2 | CHALMERS UNIVERSITY OF TECHNOLOGY                                                                     |
| 1196 | <i>Knoxdaviesia capensis</i>         | Sordario | Asco    | 12 | 6  | 15 | 11 | 44 | GCA_001510575.1 | University of Stellenbosch                                                                            |
| 1197 | <i>Eurotiomyces sp.</i>              | Eurotio  | Asco    | 9  | 18 | 7  | 10 | 44 | GCA_002917005.1 | Jill Banfield's Lab at Berkeley                                                                       |
| 1198 | <i>Schizopora paradoxa</i>           | Agarico  | Basidio | 13 | 9  | 8  | 14 | 44 | GCA_001020605.1 | DOE Joint Genome Institute                                                                            |
| 1199 | <i>Sistotremastrum suecicum</i>      | Agarico  | Basidio | 14 | 3  | 11 | 16 | 44 | GCA_001632355.1 | DOE Joint Genome Institute                                                                            |
| 1200 | <i>Termitomyces sp. MG145</i>        | Agarico  | Basidio | 11 | 8  | 11 | 14 | 44 | GCA_003313055.1 | Kunming University of Science and Technology                                                          |
| 1201 | <i>Termitomyces eurhizus</i>         | Agarico  | Basidio | 13 | 8  | 9  | 14 | 44 | GCA_003316525.1 | Kunming University of Science and Technology                                                          |
| 1202 | <i>Purpureocillium lilacinum</i>     | Sordario | Asco    | 9  | 13 | 10 | 11 | 43 | GCA_001468795.1 | The Energy and Resources Institute                                                                    |
| 1203 | <i>Cyphellophora europaea</i>        | Eurotio  | Asco    | 9  | 10 | 12 | 12 | 43 | GCA_000365145.2 | Broad Institute                                                                                       |
| 1204 | <i>Saitozyma podzolica</i>           | Tremello | Basidio | 5  | 20 | 12 | 6  | 43 | GCA_003942215.1 | Karlsruhe Institute of Technology                                                                     |
| 1205 | <i>Phialophora verrucosa</i>         | Eurotio  | Asco    | 8  | 11 | 13 | 11 | 43 | GCA_002099365.1 | Peking University First Hospital                                                                      |
| 1206 | <i>Amorphotheca resiniae</i>         | Leotio   | Asco    | 7  | 18 | 8  | 10 | 43 | GCA_001270345.1 | East China University of Science and Technology                                                       |
| 1207 | <i>Phialophora americana</i>         | Eurotio  | Asco    | 9  | 8  | 15 | 11 | 43 | GCA_000835435.1 | Broad Institute                                                                                       |
| 1208 | <i>Knufia petricola</i>              | Eurotio  | Asco    | 9  | 17 | 7  | 10 | 43 | GCA_002319055.1 | University of Natural Resources and Life Sciences                                                     |
| 1209 | <i>Phlebia centrifuga</i>            | Agarico  | Basidio | 13 | 6  | 7  | 17 | 43 | GCA_001913855.2 | CBS-KNAW Fungal Biodiversity Centre<br>Institute of the Royal Netherlands Academy of Arts and Science |
| 1210 | <i>Coprinopsis strossmayeri</i>      | Agarico  | Basidio | 11 | 6  | 13 | 13 | 43 | GCA_900156845.1 | UNIVERSITY OF BRISTOL                                                                                 |
| 1211 | <i>Davidsoniella australis</i>       | Sordario | Asco    | 10 | 15 | 6  | 12 | 43 | GCA_009806335.1 | Forestry and Agricultural Biotechnology Institute                                                     |
| 1212 | <i>Davidsoniella neocaledoniae</i>   | Sordario | Asco    | 10 | 16 | 5  | 12 | 43 | GCA_009806295.1 | Forestry and Agricultural Biotechnology Institute                                                     |



|      |                                     |          |         |    |    |    |    |    |                 |                                                                                    |
|------|-------------------------------------|----------|---------|----|----|----|----|----|-----------------|------------------------------------------------------------------------------------|
| 1213 | <i>Davidsoniella virescens</i>      | Sordario | Asco    | 10 | 16 | 5  | 12 | 43 | GCA_001513805.1 | University of Pretoria,<br>Forestry and Agricultural<br>Biotechnology Institute    |
| 1214 | <i>Davidsoniella eucalypti</i>      | Sordario | Asco    | 10 | 15 | 5  | 13 | 43 | GCA_004009845.1 | Forestry and Agricultural<br>Biotechnology Institute                               |
| 1215 | <i>Termitomyces sp. J132</i>        | Agarico  | Basidio | 11 | 7  | 11 | 14 | 43 | GCA_001263195.1 | BGI                                                                                |
| 1216 | <i>Collybia sp. MG36</i>            | Agarico  | Basidio | 10 | 11 | 7  | 15 | 43 | GCA_003313185.1 | Kunming University of<br>Science and Technology                                    |
| 1217 | <i>Sanghuangporus baumii</i>        | Agarico  | Basidio | 12 | 9  | 6  | 16 | 43 | GCA_001481415.2 | China University of<br>Petroleum                                                   |
| 1218 | <i>Podosphaera xanthii</i>          | Leotio   | Asco    | 8  | 13 | 8  | 13 | 42 | GCA_010015925.1 | National Academy of<br>Agricultural Science,<br>Rural Development<br>Adminstration |
| 1219 | <i>Epichloe uncinata</i>            | Sordario | Asco    | 9  | 10 | 11 | 12 | 42 | GCA_001043855.1 | University of Kentucky                                                             |
| 1220 | <i>Claviceps fusiformis</i>         | Sordario | Asco    | 8  | 13 | 12 | 9  | 42 | GCA_000223055.1 | University of Kentucky,<br>Dept of Plant Pathology                                 |
| 1221 | <i>Penicillium decumbens</i>        | Eurotio  | Asco    | 8  | 16 | 6  | 12 | 42 | GCA_002072245.1 | Chalmers University of<br>Technology                                               |
| 1222 | <i>Cladophialophora carrionii</i>   | Eurotio  | Asco    | 8  | 10 | 13 | 11 | 42 | GCA_000365165.2 | Broad Institute                                                                    |
| 1223 | <i>Cladophialophora yegresii</i>    | Eurotio  | Asco    | 8  | 11 | 11 | 12 | 42 | GCA_000585515.1 | Broad Institute                                                                    |
| 1224 | <i>Pluteus cervinus</i>             | Agarico  | Basidio | 13 | 7  | 7  | 15 | 42 | GCA_004369065.1 | DOE Joint Genome<br>Institute                                                      |
| 1225 | <i>Ceratocystis manginecans</i>     | Sordario | Asco    | 10 | 15 | 6  | 11 | 42 | GCA_006408425.1 | University of Pretoria                                                             |
| 1226 | <i>Ceratocystis eucalypticola</i>   | Sordario | Asco    | 10 | 15 | 6  | 11 | 42 | GCA_001513815.1 | University of pretoria                                                             |
| 1227 | <i>Ceratocystis cacaofunesta</i>    | Sordario | Asco    | 10 | 15 | 6  | 11 | 42 | GCA_002776505.1 | University of Campinas                                                             |
| 1228 | <i>Ceratocystis platani</i>         | Sordario | Asco    | 10 | 15 | 6  | 11 | 42 | GCA_000978885.1 | University of Neuchatel                                                            |
| 1229 | <i>Ceratocystis albifundus</i>      | Sordario | Asco    | 10 | 15 | 6  | 11 | 42 | GCA_002742255.2 | University of Pretoria                                                             |
| 1230 | <i>Ceratocystis fimbriata</i>       | Sordario | Asco    | 10 | 15 | 6  | 11 | 42 | GCA_009914735.1 | Universidade Federal de<br>Vicosá                                                  |
| 1231 | <i>Ceratocystis harringtonii</i>    | Sordario | Asco    | 10 | 15 | 6  | 11 | 42 | GCA_002018265.1 | Forestry and Agricultural<br>Biotechnology Institute                               |
| 1232 | <i>Macrocystidia cucumis</i>        | Agarico  | Basidio | 12 | 9  | 7  | 14 | 42 | GCA_001179725.1 | Royal Botanic Gardens,<br>Kew                                                      |
| 1233 | <i>Rickenella mellea</i>            | Agarico  | Basidio | 11 | 12 | 3  | 16 | 42 | GCA_004355085.1 | DOE Joint Genome<br>Institute                                                      |
| 1234 | <i>Sistotremastrum niveocremeum</i> | Agarico  | Basidio | 14 | 3  | 10 | 15 | 42 | GCA_001630475.1 | DOE Joint Genome<br>Institute                                                      |
| 1235 | <i>Clitocybe nebularis</i>          | Agarico  | Basidio | 11 | 9  | 8  | 14 | 42 | GCA_900068955.1 | Royal Botanic Gardens,<br>Kew                                                      |
| 1236 | <i>Lecanicillium psalliotae</i>     | Sordario | Asco    | 10 | 12 | 8  | 11 | 41 | GCA_002796755.1 | Western Sydney<br>University                                                       |
| 1237 | <i>Thermoascus crustaceus</i>       | Eurotio  | Asco    | 9  | 13 | 9  | 10 | 41 | GCA_001599835.1 | RIKEN Center for Life<br>Science Technologies,                                     |

|      |                                   |                 |           |    |    |    |    |    |                 |                                                                                 |
|------|-----------------------------------|-----------------|-----------|----|----|----|----|----|-----------------|---------------------------------------------------------------------------------|
| 1238 | <i>Geosmithia morbida</i>         | Sordario        | Asco      | 10 | 14 | 5  | 12 | 41 | GCA_900108815.1 | Division of Genomic Technologies<br>UNIVERSITY OF NEW HAMPSHIRE                 |
| 1239 | <i>Leptographium procerum</i>     | Sordario        | Asco      | 10 | 18 | 2  | 11 | 41 | GCA_000806385.1 | University of Pretoria                                                          |
| 1240 | <i>Fomitopsis pinicola</i>        | Agarico         | Basidio   | 9  | 12 | 10 | 10 | 41 | GCA_000344655.2 | DOE Joint Genome Institute                                                      |
| 1241 | <i>Antrodiella citrinella</i>     | Agarico         | Basidio   | 12 | 7  | 10 | 12 | 41 | GCA_004802725.1 | IHI Zittau / TU Dresden                                                         |
| 1242 | <i>Daedalea quercina</i>          | Agarico         | Basidio   | 9  | 10 | 11 | 11 | 41 | GCA_001632345.1 | DOE Joint Genome Institute                                                      |
| 1243 | <i>Exophiala sp.</i>              | Eurotio         | Asco      | 8  | 13 | 8  | 12 | 41 | GCA_004026505.1 | Jill Banfield's Lab at Berkeley                                                 |
| 1244 | <i>Pholiota microspora</i>        | Agarico         | Basidio   | 10 | 9  | 10 | 12 | 41 | GCA_003314615.1 | Kunming University of Science and Technology                                    |
| 1245 | <i>Pecoramyces ruminatium</i>     | Neocallimastigo | Chytridio | 10 | 15 | 16 | 0  | 41 | GCA_000412615.1 | Oklahoma State University                                                       |
| 1246 | <i>Chalaropsis thielavioides</i>  | Sordario        | Asco      | 10 | 14 | 5  | 12 | 41 | GCA_001599435.1 | RIKEN Center for Life Science Technologies,<br>Division of Genomic Technologies |
| 1247 | <i>Lepiota venenata</i>           | Agarico         | Basidio   | 11 | 8  | 8  | 14 | 41 | GCA_004296355.1 | Kunming Institute of Botany                                                     |
| 1248 | <i>Aspergillus tanneri</i>        | Eurotio         | Asco      | 11 | 16 | 2  | 11 | 40 | GCA_003426965.1 | JCVI                                                                            |
| 1249 | <i>Exophiala oligosperma</i>      | Eurotio         | Asco      | 8  | 10 | 11 | 11 | 40 | GCA_000835515.1 | Broad Institute                                                                 |
| 1250 | <i>Claviceps paspali</i>          | Sordario        | Asco      | 7  | 12 | 11 | 10 | 40 | GCA_013435705.1 | INIA                                                                            |
| 1251 | <i>Eremomyces bilateralis</i>     | Dothideo        | Asco      | 8  | 13 | 8  | 11 | 40 | GCA_010015585.1 | DOE Joint Genome Institute                                                      |
| 1252 | <i>Epichloe bromicola</i>         | Sordario        | Asco      | 8  | 11 | 10 | 11 | 40 | GCA_002319005.1 | University of Kentucky                                                          |
| 1253 | <i>Fomitopsis rosea</i>           | Agarico         | Basidio   | 10 | 9  | 9  | 12 | 40 | GCA_004679265.1 | IHI Zittau / TU Dresden                                                         |
| 1254 | <i>Byssochlamys spectabilis</i>   | Eurotio         | Asco      | 6  | 16 | 7  | 11 | 40 | GCA_003990805.1 | Kweichow moutai Co.,Ltd.                                                        |
| 1255 | <i>Neolentinus lepideus</i>       | Agarico         | Basidio   | 9  | 11 | 9  | 11 | 40 | GCA_001632425.1 | DOE Joint Genome Institute                                                      |
| 1256 | <i>Neocallimastix californiae</i> | Neocallimastigo | Chytridio | 10 | 15 | 15 | 0  | 40 | GCA_002104975.1 | DOE Joint Genome Institute                                                      |
| 1257 | <i>Termitomyces heimii</i>        | Agarico         | Basidio   | 13 | 6  | 7  | 14 | 40 | GCA_003313675.1 | Kunming University of Science and Technology                                    |
| 1258 | <i>Laetiporus sulphureus</i>      | Agarico         | Basidio   | 10 | 11 | 9  | 10 | 40 | GCA_001632365.1 | DOE Joint Genome Institute                                                      |
| 1259 | <i>Fibroporia radiculosa</i>      | Agarico         | Basidio   | 10 | 10 | 8  | 12 | 40 | GCA_000313525.1 | Forest Products,<br>Mississippi State University                                |
| 1260 | <i>Phellinidium pouzarii</i>      | Agarico         | Basidio   | 12 | 7  | 6  | 15 | 40 | GCA_004802695.1 | IHI Zittau / TU Dresden                                                         |
| 1261 | <i>Exophiala aquamarina</i>       | Eurotio         | Asco      | 9  | 9  | 8  | 13 | 39 | GCA_000709125.1 | Broad Institute                                                                 |

|      |                                    |             |         |    |    |    |    |    |                 |                                                                              |
|------|------------------------------------|-------------|---------|----|----|----|----|----|-----------------|------------------------------------------------------------------------------|
| 1262 | <i>Lepidopterella palustris</i>    | Dothideo    | Asco    | 9  | 12 | 7  | 11 | 39 | GCA_001692735.1 | DOE Joint Genome Institute                                                   |
| 1263 | <i>Raffaelea sulphurea</i>         | Sordario    | Asco    | 10 | 15 | 3  | 11 | 39 | GCA_002778055.1 | University of Montana                                                        |
| 1264 | <i>Exophiala sideris</i>           | Eurotio     | Asco    | 7  | 13 | 9  | 10 | 39 | GCA_000835395.1 | Broad Institute                                                              |
| 1265 | <i>Claviceps arundinis</i>         | Sordario    | Asco    | 8  | 13 | 9  | 9  | 39 | GCA_004016465.1 | Agriculture and Agri-Food Canada                                             |
| 1266 | <i>Claviceps spartinae</i>         | Sordario    | Asco    | 8  | 13 | 9  | 9  | 39 | GCA_004016175.1 | Agriculture and Agri-Food Canada                                             |
| 1267 | <i>Epichloe aotearoae</i>          | Sordario    | Asco    | 8  | 10 | 11 | 10 | 39 | GCA_000729855.1 | University of Kentucky                                                       |
| 1268 | <i>Claviceps humidiphila</i>       | Sordario    | Asco    | 8  | 13 | 9  | 9  | 39 | GCA_004016155.1 | Agriculture and Agri-Food Canada                                             |
| 1269 | <i>Grosmannia galeiformis</i>      | Sordario    | Asco    | 10 | 13 | 4  | 12 | 39 | GCA_004028395.1 | University of Pretoria                                                       |
| 1270 | <i>Atkinsonella hypoxylon</i>      | Sordario    | Asco    | 7  | 13 | 10 | 9  | 39 | GCA_000729835.1 | University of Kentucky                                                       |
| 1271 | <i>Claviceps cf. purpurea</i>      | Sordario    | Asco    | 8  | 13 | 9  | 9  | 39 | GCA_004016475.1 | Agriculture and Agri-Food Canada                                             |
| 1272 | <i>Moesziomyces sp. F16C1</i>      | Ustilagino  | Basidio | 6  | 15 | 10 | 8  | 39 | GCA_003004725.1 | Universidade de Sao Paulo                                                    |
| 1273 | <i>Endoconidiophora polonica</i>   | Sordario    | Asco    | 10 | 15 | 3  | 11 | 39 | GCA_001856765.1 | Forestry and Agricultural Biotechnology Institute                            |
| 1274 | <i>Endoconidiophora laricicola</i> | Sordario    | Asco    | 10 | 15 | 3  | 11 | 39 | GCA_001640655.1 | Forestry and Agricultural Biotechnology Institute                            |
| 1275 | <i>Ceratocystis adiposa</i>        | Sordario    | Asco    | 9  | 13 | 6  | 11 | 39 | GCA_001640685.1 | Forestry and Agricultural Biotechnology Institute                            |
| 1276 | <i>Gymnopilus junonius</i>         | Agarico     | Basidio | 11 | 3  | 10 | 15 | 39 | GCA_900068935.1 | Royal Botanic Gardens, Kew                                                   |
| 1277 | <i>Ceratocystis smalleyi</i>       | Sordario    | Asco    | 9  | 14 | 6  | 10 | 39 | GCA_003449175.1 | Forestry and Agricultural Biotechnology Institute                            |
| 1278 | <i>Moniliophthora perniciosa</i>   | Agarico     | Basidio | 9  | 8  | 8  | 14 | 39 | GCA_000183025.1 | Universidade Estadual de Campinas (UNICAMP), Brazil                          |
| 1279 | <i>Omphalotus olearius</i>         | Agarico     | Basidio | 12 | 7  | 4  | 16 | 39 | GCA_000296255.1 | University of Minnesota                                                      |
| 1280 | <i>Lentinula edodes</i>            | Agarico     | Basidio | 11 | 10 | 3  | 15 | 39 | GCA_001562095.1 | Chungbuk National University                                                 |
| 1281 | <i>Calocybe gambosa</i>            | Agarico     | Basidio | 8  | 7  | 11 | 13 | 39 | GCA_900068965.1 | Royal Botanic Gardens, Kew                                                   |
| 1282 | <i>Umbelopsis isabellina</i>       | Umbelopsido | Mucoro  | 6  | 18 | 7  | 7  | 38 | GCA_000697415.1 | IGS                                                                          |
| 1283 | <i>Symbiotaphrina buchneri</i>     | Xylono      | Asco    | 7  | 15 | 6  | 10 | 38 | GCA_001599915.1 | RIKEN Center for Life Science Technologies, Division of Genomic Technologies |
| 1284 | <i>fungal sp. No.11243</i>         | 0           | 0       | 9  | 14 | 5  | 10 | 38 | GCA_000836255.1 | Tsukuba Biotechnology Research Center, Astellas Pharma Inc.,                 |

|      |                                   |                 |           |    |    |    |    |    |                 |                                                                              |
|------|-----------------------------------|-----------------|-----------|----|----|----|----|----|-----------------|------------------------------------------------------------------------------|
| 1285 | <i>Calocera cornea</i>            | Dacry           | Basidio   | 7  | 11 | 11 | 9  | 38 | GCA_001632435.1 | DOE Joint Genome Institute                                                   |
| 1286 | <i>Epichloe brachyelytri</i>      | Sordario        | Asco      | 8  | 10 | 10 | 10 | 38 | GCA_000222915.1 | University of Kentucky, Dept of Plant Pathology                              |
| 1287 | <i>Epichloe festucae</i>          | Sordario        | Asco      | 8  | 10 | 10 | 10 | 38 | GCA_002318955.1 | University of Kentucky                                                       |
| 1288 | <i>Epichloe baconii</i>           | Sordario        | Asco      | 8  | 10 | 10 | 10 | 38 | GCA_000729845.1 | University of Kentucky                                                       |
| 1289 | <i>Epichloe elymi</i>             | Sordario        | Asco      | 8  | 10 | 10 | 10 | 38 | GCA_002591845.1 | Massey University                                                            |
| 1290 | <i>Claviceps purpurea</i>         | Sordario        | Asco      | 8  | 13 | 8  | 9  | 38 | GCA_004016095.1 | Agriculture and Agri-Food Canada                                             |
| 1291 | <i>Aciculosporium take</i>        | Sordario        | Asco      | 8  | 11 | 8  | 11 | 38 | GCA_000222935.2 | University of Kentucky, Dept of Plant Pathology                              |
| 1292 | <i>Rhinocladiella mackenziei</i>  | Eurotio         | Asco      | 8  | 10 | 9  | 11 | 38 | GCA_000835555.1 | Broad Institute                                                              |
| 1293 | <i>Postia placenta</i>            | Agarico         | Basidio   | 10 | 10 | 8  | 10 | 38 | GCA_002117355.1 | DOE Joint Genome Institute                                                   |
| 1294 | <i>Moesziomyces sp. F5C1</i>      | Ustilagino      | Basidio   | 6  | 14 | 10 | 8  | 38 | GCA_003004715.1 | Universidade de Sao Paulo                                                    |
| 1295 | <i>Huntia omanensis</i>           | Sordario        | Asco      | 10 | 12 | 4  | 12 | 38 | GCA_000833645.1 | FABI                                                                         |
| 1296 | <i>Megacollybia marginata</i>     | Agarico         | Basidio   | 10 | 7  | 7  | 14 | 38 | GCA_003313965.1 | Kunming University of Science and Technology                                 |
| 1297 | <i>Sanghuangporus sanghuang</i>   | Agarico         | Basidio   | 12 | 6  | 6  | 14 | 38 | GCA_009806525.1 | Anhui Provincial Key Laboratory of Microbial Pest Control                    |
| 1298 | <i>Piromyces sp. E2</i>           | Neocallimastigo | Chytridio | 9  | 14 | 15 | 0  | 38 | GCA_002157105.1 | JGI                                                                          |
| 1299 | <i>Infundibulicybe gibba</i>      | Agarico         | Basidio   | 12 | 8  | 4  | 14 | 38 | GCA_900068925.1 | Royal Botanic Gardens, Kew                                                   |
| 1300 | <i>Torrubiella hemipterigena</i>  | Sordario        | Asco      | 9  | 10 | 6  | 12 | 37 | GCA_000825705.1 | HKI JENA                                                                     |
| 1301 | <i>Lecanicillium sp. MT-2017a</i> | Sordario        | Asco      | 7  | 12 | 8  | 10 | 37 | GCA_003056605.1 | Northern Arizona University                                                  |
| 1302 | <i>Akanthomyces lecanii</i>       | Sordario        | Asco      | 9  | 10 | 6  | 12 | 37 | GCA_001636795.1 | Shanghai Institutes for Biological Sciences, CAS                             |
| 1303 | <i>Cladophialophora immunda</i>   | Eurotio         | Asco      | 6  | 9  | 12 | 10 | 37 | GCA_000835495.1 | Broad Institute                                                              |
| 1304 | <i>Epichloe sylvatica</i>         | Sordario        | Asco      | 8  | 10 | 9  | 10 | 37 | GCA_001008265.1 | University of Kentucky                                                       |
| 1305 | <i>Epichloe gansuensis</i>        | Sordario        | Asco      | 9  | 9  | 9  | 10 | 37 | GCA_000222895.2 | University of Kentucky, Dept of Plant Pathology                              |
| 1306 | <i>Exophiala dermatitidis</i>     | Eurotio         | Asco      | 8  | 8  | 10 | 11 | 37 | GCA_010883545.1 | Research Center for Medical Mycology - Peking University First Hospital      |
| 1307 | <i>Sporothrix phasma</i>          | Sordario        | Asco      | 11 | 9  | 7  | 10 | 37 | GCA_011037845.1 | University of Pretoria                                                       |
| 1308 | <i>Epichloe typhina</i>           | Sordario        | Asco      | 8  | 10 | 9  | 10 | 37 | GCA_000308955.1 | University of Kentucky                                                       |
| 1309 | <i>Exophiala alcalophila</i>      | Eurotio         | Asco      | 8  | 7  | 10 | 12 | 37 | GCA_001599775.1 | RIKEN Center for Life Science Technologies, Division of Genomic Technologies |

|      |                                      |               |         |    |    |    |    |    |                 |                                                   |
|------|--------------------------------------|---------------|---------|----|----|----|----|----|-----------------|---------------------------------------------------|
| 1310 | <i>Epichloe sp. AL9924</i>           | Sordario      | Asco    | 8  | 10 | 9  | 10 | 37 | GCA_000729825.1 | University of Kentucky                            |
| 1311 | <i>Moesziomyces aphidis</i>          | Ustilagino    | Basidio | 5  | 14 | 10 | 8  | 37 | GCA_000517465.1 | Fraunhofer IGB                                    |
| 1312 | <i>Balansia obtecta</i>              | Sordario      | Asco    | 8  | 11 | 8  | 10 | 37 | GCA_000709145.1 | University of Kentucky                            |
| 1313 | <i>Fistulina hepatica</i>            | Agarico       | Basidio | 10 | 9  | 4  | 14 | 37 | GCA_000934395.1 | DOE Joint Genome Institute                        |
| 1314 | <i>Huntiaella savannae</i>           | Sordario      | Asco    | 9  | 13 | 4  | 11 | 37 | GCA_001483325.1 | Forestry and Agricultural Biotechnology Institute |
| 1315 | <i>Wolfiporia cocos</i>              | Agarico       | Basidio | 9  | 9  | 8  | 11 | 37 | GCA_000344635.1 | DOE Joint Genome Institute                        |
| 1316 | <i>Huntiaella decipiens</i>          | Sordario      | Asco    | 9  | 13 | 4  | 11 | 37 | GCA_003032515.1 | Forestry and Agricultural Biotechnology Institute |
| 1317 | <i>Huntiaella moniliformis</i>       | Sordario      | Asco    | 9  | 13 | 4  | 11 | 37 | GCA_000712465.1 | Forestry and Agricultural Biotechnology Institute |
| 1318 | <i>Cryomyces minteri</i>             | Dothideo      | Asco    | 7  | 9  | 7  | 13 | 36 | GCA_005059845.1 | University of California, Riverside               |
| 1319 | <i>Epichloe inebrians</i>            | Sordario      | Asco    | 9  | 8  | 9  | 10 | 36 | GCA_000309355.1 | University of Kentucky                            |
| 1320 | <i>Atkinsonella texensis</i>         | Sordario      | Asco    | 7  | 12 | 8  | 9  | 36 | GCA_001008035.1 | University of Kentucky                            |
| 1321 | <i>Apiotrichum porosum</i>           | Tremello      | Basidio | 6  | 15 | 6  | 9  | 36 | GCA_003942205.1 | Karlsruhe Institute of Technology                 |
| 1322 | <i>Basidioascus undulatus</i>        | Geminibasidio | Basidio | 8  | 12 | 4  | 12 | 36 | GCA_000826855.1 | University of Ottawa                              |
| 1323 | <i>Epichloe amarillans</i>           | Sordario      | Asco    | 7  | 10 | 10 | 9  | 36 | GCA_000223075.2 | University of Kentucky, Dept of Plant Pathology   |
| 1324 | <i>Tuber brumale</i>                 | Pezizo        | Asco    | 10 | 12 | 3  | 11 | 36 | GCA_014065205.1 | INRAE                                             |
| 1325 | <i>Tuber umbilicatum</i>             | Pezizo        | Asco    | 10 | 12 | 2  | 12 | 36 | GCA_003313605.1 | Kunming University of Science and Technology      |
| 1326 | <i>Moesziomyces antarcticus</i>      | Ustilagino    | Basidio | 6  | 12 | 10 | 8  | 36 | GCA_900322835.1 | Technische Universitat Munchen - WZW              |
| 1327 | <i>Ambrosiella xylebori</i>          | Sordario      | Asco    | 9  | 11 | 5  | 11 | 36 | GCA_002778035.1 | University of Montana                             |
| 1328 | <i>Huntiaella bhutanensis</i>        | Sordario      | Asco    | 9  | 12 | 4  | 11 | 36 | GCA_002018275.1 | Forestry and Agricultural Biotechnology Institute |
| 1329 | <i>Verruconis sp.</i>                | Dothideo      | Asco    | 9  | 11 | 5  | 11 | 36 | GCA_004026245.1 | Jill Banfield's Lab at Berkeley                   |
| 1330 | <i>Calocera viscosa</i>              | Dacry         | Basidio | 7  | 10 | 9  | 9  | 35 | GCA_001630345.1 | DOE Joint Genome Institute                        |
| 1331 | <i>Tuber magnatum</i>                | Pezizo        | Asco    | 10 | 10 | 4  | 11 | 35 | GCA_003182015.1 | INRA                                              |
| 1332 | <i>Sporisorium reilianum</i>         | Ustilagino    | Basidio | 7  | 11 | 9  | 8  | 35 | GCA_900162835.1 | Technische Universitat Munchen - WZW              |
| 1333 | <i>Agaricus bisporus</i>             | Agarico       | Basidio | 11 | 2  | 7  | 15 | 35 | GCA_008271545.1 | Jilin Agricultural University                     |
| 1334 | <i>Pterula multifida</i>             | Agarico       | Basidio | 11 | 6  | 4  | 14 | 35 | GCA_900068985.1 | Royal Botanic Gardens, Kew                        |
| 1335 | <i>Tolyposcladium sp. Sup5 PDA-1</i> | Sordario      | Asco    | 9  | 9  | 6  | 10 | 34 | GCA_000750105.3 | OMRF                                              |
| 1336 | <i>Ustilaginoidea virens</i>         | Sordario      | Asco    | 8  | 10 | 5  | 11 | 34 | GCA_000965225.2 | Computational Biology Research Center (CBRC),     |

|      |                                      |            |         |    |    |    |    |    |                 |                                                                         |
|------|--------------------------------------|------------|---------|----|----|----|----|----|-----------------|-------------------------------------------------------------------------|
| 1337 | <i>Fonsecaea multimorphosa</i>       | Eurotio    | Asco    | 6  | 8  | 11 | 9  | 34 | GCA_000836435.1 | National Institute of Advanced Industrial Science and Technology (AIST) |
| 1338 | <i>Exophiala phaeomuriformis</i>     | Eurotio    | Asco    | 7  | 8  | 9  | 10 | 34 | GCA_010883475.1 | Broad Institute                                                         |
| 1339 | <i>Exophiala spinifera</i>           | Eurotio    | Asco    | 8  | 6  | 9  | 11 | 34 | GCA_010882955.1 | Research Center for Medical Mycology - Peking University First Hospital |
| 1340 | <i>Eurotiomyces sp. MA 6038</i>      | Eurotio    | Asco    | 8  | 9  | 5  | 12 | 34 | GCA_003004525.2 | Research Center for Medical Mycology - Peking University First Hospital |
| 1341 | <i>Pseudozyma hubeiensis</i>         | Ustilagino | Basidio | 6  | 12 | 8  | 8  | 34 | GCA_000403515.1 | University of Natural Resources and Life Sciences, Vienna               |
| 1342 | <i>Pseudozyma tsukubaensis</i>       | Ustilagino | Basidio | 5  | 14 | 7  | 8  | 34 | GCA_001736125.1 | Kitami Institute of Technology                                          |
| 1343 | <i>Tuber indicum</i>                 | Pezizo     | Asco    | 10 | 11 | 3  | 10 | 34 | GCA_006112555.1 | RWTH Aachen University                                                  |
| 1344 | <i>Dacryopinax primogenitus</i>      | Dacry      | Basidio | 7  | 8  | 10 | 9  | 34 | GCA_000292625.1 | College of Pharmacy and Biological Engineering                          |
| 1345 | <i>Tuber melanosporum</i>            | Pezizo     | Asco    | 10 | 10 | 3  | 11 | 34 | GCA_000151645.1 | DOE Joint Genome Institute                                              |
| 1346 | <i>Boletus edulis</i>                | Agarico    | Basidio | 11 | 5  | 5  | 13 | 34 | GCA_003316165.1 | The French-Italian Tuber Genome Consortium                              |
| 1347 | <i>Drechlerella stenobrocha</i>      | Orbilio    | Asco    | 10 | 8  | 7  | 9  | 34 | GCA_000525045.1 | Kunming University of Science and Technology                            |
| 1348 | <i>Lecanicillium fungicola</i>       | Sordario   | Asco    | 8  | 9  | 5  | 11 | 33 | GCA_900169235.1 | Institute of Microbiology, Chinese Academy of Sciences                  |
| 1349 | <i>Metarhizium robertsii</i>         | Sordario   | Asco    | 10 | 5  | 6  | 12 | 33 | GCA_000187425.2 | UNIVERSITY OF BRISTOL                                                   |
| 1350 | <i>Microcyclospora tardicrescens</i> | Dothideo   | Asco    | 7  | 10 | 8  | 8  | 33 | GCA_003012245.1 | Metarhizium genome sequencing Consortium                                |
| 1351 | <i>Coniosporium apollinis</i>        | Dothideo   | Asco    | 8  | 8  | 4  | 13 | 33 | GCA_000281105.1 | USDA, ARS, NCAUR                                                        |
| 1352 | <i>Ramichloridium luteum</i>         | Dothideo   | Asco    | 6  | 7  | 8  | 12 | 33 | GCA_002368545.1 | Broad Institute                                                         |
| 1353 | <i>Tuber microsphaerosporum</i>      | Pezizo     | Asco    | 9  | 12 | 2  | 10 | 33 | GCA_003521225.1 | Northwest A&F University                                                |
| 1354 | <i>Fonsecaea pugnacius</i>           | Eurotio    | Asco    | 6  | 7  | 10 | 10 | 33 | GCA_011800825.1 | Kunming University of Science and Technology                            |
| 1355 | <i>Apiotrichum laibachii</i>         | Tremello   | Basidio | 6  | 11 | 7  | 9  | 33 | GCA_001600735.1 | FEDERAL UNIVERSITY OF PARANA                                            |

National Institute of Advanced Industrial Science and Technology (AIST)

Broad Institute

Research Center for Medical Mycology - Peking University First Hospital

Research Center for Medical Mycology - Peking University First Hospital

University of Natural Resources and Life Sciences, Vienna

Kitami Institute of Technology

RWTH Aachen University

College of Pharmacy and Biological Engineering

DOE Joint Genome Institute

The French-Italian Tuber Genome Consortium

Kunming University of Science and Technology

Institute of Microbiology, Chinese Academy of Sciences

UNIVERSITY OF BRISTOL

Metarhizium genome sequencing Consortium

USDA, ARS, NCAUR

Broad Institute

Northwest A&F University

Kunming University of Science and Technology

FEDERAL UNIVERSITY OF PARANA

RIKEN Center for Life Science Technologies,

|      |                                     |            |         |    |    |    |    |    |                 |                                                                                                                     |
|------|-------------------------------------|------------|---------|----|----|----|----|----|-----------------|---------------------------------------------------------------------------------------------------------------------|
| 1356 | <i>Apiotrichum veenhuisii</i>       | Tremello   | Basidio | 7  | 12 | 6  | 8  | 33 | GCA_001600595.1 | Division of Genomic Technologies<br>RIKEN Center for Life Science Technologies,<br>Division of Genomic Technologies |
| 1357 | <i>Fonsecaea erecta</i>             | Eurotio    | Asco    | 6  | 8  | 10 | 9  | 33 | GCA_001651985.1 | Federal University of Parana                                                                                        |
| 1358 | <i>Eurotiomyces sp. MA 6039</i>     | Eurotio    | Asco    | 8  | 10 | 4  | 11 | 33 | GCA_003004485.1 | University of Natural Resources and Life Sciences, Vienna                                                           |
| 1359 | <i>Pseudozyma sp. F8B2</i>          | Ustilagino | Basidio | 5  | 12 | 8  | 8  | 33 | GCA_003004685.1 | Universidade de Sao Paulo                                                                                           |
| 1360 | <i>Papiliotrema flavescens</i>      | Tremello   | Basidio | 7  | 10 | 6  | 10 | 33 | GCA_000442785.1 | OSU/OARDC                                                                                                           |
| 1361 | <i>Ustilago cynodontis</i>          | Ustilagino | Basidio | 6  | 11 | 7  | 9  | 33 | GCA_001736195.1 | RWTH Aachen University                                                                                              |
| 1362 | <i>Sparassis latifolia</i>          | Agarico    | Basidio | 10 | 5  | 6  | 12 | 33 | GCA_009812315.1 | Chosun University                                                                                                   |
| 1363 | <i>Chiuia virens</i>                | Agarico    | Basidio | 11 | 6  | 5  | 11 | 33 | GCA_003316485.1 | Kunming University of Science and Technology                                                                        |
| 1364 | <i>Dioszegia aurantiaca</i>         | Tremello   | Basidio | 6  | 13 | 7  | 7  | 33 | GCA_001600655.1 | RIKEN Center for Life Science Technologies,<br>Division of Genomic Technologies                                     |
| 1365 | <i>Coprinus comatus</i>             | Agarico    | Basidio | 11 | 3  | 6  | 13 | 33 | GCA_003316025.1 | Kunming University of Science and Technology                                                                        |
| 1366 | <i>Paecilomyces hepiali</i>         | Sordario   | Asco    | 7  | 8  | 6  | 11 | 32 | GCA_001455915.2 | Beijing Normal University                                                                                           |
| 1367 | <i>Metarhizium guizhouense</i>      | Sordario   | Asco    | 9  | 5  | 6  | 12 | 32 | GCA_000814955.1 | Shanghai Insitutes for Biological Sciences, CAS                                                                     |
| 1368 | <i>Cladophialophora psammophila</i> | Eurotio    | Asco    | 6  | 7  | 9  | 10 | 32 | GCA_000585535.1 | Broad Institute                                                                                                     |
| 1369 | <i>Pascua guehoae</i>               | Tremello   | Basidio | 7  | 10 | 7  | 8  | 32 | GCA_001600415.1 | RIKEN Center for Life Science Technologies,<br>Division of Genomic Technologies                                     |
| 1370 | <i>Cryomyces antarcticus</i>        | Dothideo   | Asco    | 7  | 7  | 5  | 13 | 32 | GCA_000504465.1 | VIBT Extremophile Center, University of Natural Resources and Life Sciences Vienna, Austria                         |
| 1371 | <i>Cutaneotrichosporon mucoides</i> | Tremello   | Basidio | 5  | 11 | 8  | 8  | 32 | GCA_003116955.1 | RIKEN Center for Life Science Technologies,<br>Division of Genomic Technologies                                     |
| 1372 | <i>Apiotrichum gamsii</i>           | Tremello   | Basidio | 6  | 12 | 7  | 7  | 32 | GCA_001600315.1 | RIKEN Center for Life Science Technologies,                                                                         |

|      |                                   |            |         |    |    |   |    |    |                 |                                                                                                 |
|------|-----------------------------------|------------|---------|----|----|---|----|----|-----------------|-------------------------------------------------------------------------------------------------|
| 1373 | <i>Anthracoystis flocculosa</i>   | Ustilagino | Basidio | 6  | 14 | 5 | 7  | 32 | GCA_900322975.1 | Division of Genomic Technologies<br>Technische Universitat Munchen - WZW                        |
| 1374 | <i>Sporisorium graminicola</i>    | Ustilagino | Basidio | 4  | 13 | 8 | 7  | 32 | GCA_005498985.1 | University of Liverpool,<br>Institute of Integrative Biology                                    |
| 1375 | <i>Kalmanozyma brasiliensis</i>   | Ustilagino | Basidio | 5  | 11 | 7 | 9  | 32 | GCA_000497045.1 | Laboratorio Nacional de Ciencia e Tecnologia do Bioetanol                                       |
| 1376 | <i>Ustilago tritici</i>           | Ustilagino | Basidio | 6  | 11 | 7 | 8  | 32 | GCA_002993085.1 | University of Sao Paulo<br>Department of Pediatric Cardiology, Tokyo Women's Medical University |
| 1377 | <i>Sparassis crispa</i>           | Agarico    | Basidio | 9  | 6  | 6 | 11 | 32 | GCA_003851025.1 | RWTH Aachen University                                                                          |
| 1378 | <i>Ustilago xerochloae</i>        | Ustilagino | Basidio | 5  | 10 | 8 | 9  | 32 | GCA_001736075.1 | DOE Joint Genome Institute                                                                      |
| 1379 | <i>Ascodesmis nigricans</i>       | Pezizo     | Asco    | 11 | 6  | 4 | 11 | 32 | GCA_004786065.1 | Kunming University of Science and Technology                                                    |
| 1380 | <i>Suillus pictus</i>             | Agarico    | Basidio | 10 | 3  | 6 | 13 | 32 | GCA_003313085.1 | Royal Botanic Gardens, Kew                                                                      |
| 1381 | <i>Megacollybia platyphylla</i>   | Agarico    | Basidio | 10 | 4  | 7 | 11 | 32 | GCA_900068915.1 | University of California, Riverside                                                             |
| 1382 | <i>Bifiguratus adelaidae</i>      | Endogono   | Mucoro  | 7  | 11 | 6 | 7  | 31 | GCA_002261195.1 | Chonbuk National University                                                                     |
| 1383 | <i>Metarhizium anisopliae</i>     | Sordario   | Asco    | 9  | 4  | 6 | 12 | 31 | GCA_013305495.1 | CSIR- Institute of Microbial technology (IMTECH)                                                |
| 1384 | <i>Cordyceps farinosa</i>         | Sordario   | Asco    | 7  | 7  | 6 | 11 | 31 | GCA_000733625.1 | Shanghai Insititutes for Biological Sciences, CAS                                               |
| 1385 | <i>Metarhizium majus</i>          | Sordario   | Asco    | 9  | 5  | 5 | 12 | 31 | GCA_000814945.1 | Shanghai Insititutes for Biological Sciences, CAS                                               |
| 1386 | <i>Metarhizium brunneum</i>       | Sordario   | Asco    | 9  | 4  | 6 | 12 | 31 | GCA_000814965.1 | CSIR- Institute of Microbial technology (IMTECH)                                                |
| 1387 | <i>Beauveria rudraprayagi</i>     | Sordario   | Asco    | 9  | 5  | 4 | 13 | 31 | GCA_000733645.1 | Broad Institute                                                                                 |
| 1388 | <i>Cladophialophora bantiana</i>  | Eurotio    | Asco    | 6  | 6  | 9 | 10 | 31 | GCA_000835475.1 | PROIMI - CONICET                                                                                |
| 1389 | <i>Apiotrichum akiyoshidainum</i> | Tremello   | Basidio | 7  | 10 | 6 | 8  | 31 | GCA_002973495.1 | University of Pretoria                                                                          |
| 1390 | <i>Ceratocystiopsis minuta</i>    | Sordario   | Asco    | 7  | 11 | 3 | 10 | 31 | GCA_001676865.1 | DOE Joint Genome Institute                                                                      |
| 1391 | <i>Polychaeton citri</i>          | Dothideo   | Asco    | 6  | 10 | 5 | 10 | 31 | GCA_010093785.1 | Beijing Technology and Business University                                                      |
| 1392 | <i>Monascus purpureus</i>         | Eurotio    | Asco    | 7  | 10 | 4 | 10 | 31 | GCA_011319195.1 |                                                                                                 |



|      |                                        |                 |           |    |    |    |    |    |                 |                                                                                                                                                           |
|------|----------------------------------------|-----------------|-----------|----|----|----|----|----|-----------------|-----------------------------------------------------------------------------------------------------------------------------------------------------------|
| 1393 | <i>Tuber borchii</i>                   | Pezizo          | Asco      | 9  | 10 | 2  | 10 | 31 | GCA_003070745.1 | DOE Joint Genome Institute                                                                                                                                |
| 1394 | <i>Capronia coronata</i>               | Eurotio         | Asco      | 8  | 5  | 6  | 12 | 31 | GCA_000585585.1 | Broad Institute<br>RIKEN Center for Life Science Technologies,<br>Division of Genomic Technologies                                                        |
| 1395 | <i>Cutaneotrichosporon daszewskae</i>  | Tremello        | Basidio   | 5  | 10 | 8  | 8  | 31 | GCA_002335585.1 | RWTH Aachen University                                                                                                                                    |
| 1396 | <i>Sporisorium iseilematis-ciliati</i> | Ustilagino      | Basidio   | 4  | 11 | 8  | 8  | 31 | GCA_001748505.1 | DOE Joint Genome Institute                                                                                                                                |
| 1397 | <i>Violaceomyces palustris</i>         | Ustilagino      | Basidio   | 6  | 11 | 4  | 10 | 31 | GCA_003144235.1 | DOE Joint Genome Institute                                                                                                                                |
| 1398 | <i>Kockovaella imperatae</i>           | Tremello        | Basidio   | 6  | 10 | 8  | 7  | 31 | GCA_002102565.1 | RIKEN Center for Life Science Technologies,<br>Division of Genomic Technologies                                                                           |
| 1399 | <i>Takashimella koratensis</i>         | Tremello        | Basidio   | 5  | 12 | 8  | 6  | 31 | GCA_003116875.1 | University of Oslo                                                                                                                                        |
| 1400 | <i>Serpula lacrymans</i>               | Agarico         | Basidio   | 10 | 6  | 5  | 10 | 31 | GCA_002891385.1 | DOE Joint Genome Institute                                                                                                                                |
| 1401 | <i>Gonapodya prolifera</i>             | Monoblepharido  | Chytridio | 6  | 15 | 1  | 9  | 31 | GCA_001574975.1 | Kunming University of Science and Technology<br>Agriculture and Agri-Food Canada                                                                          |
| 1402 | <i>Xerocomus impolitus</i>             | Agarico         | Basidio   | 10 | 5  | 4  | 12 | 31 | GCA_003316335.1 | DOE Joint Genome Institute                                                                                                                                |
| 1403 | <i>Powellomyces hirtus</i>             | Chytridio       | Chytridio | 10 | 10 | 1  | 10 | 31 | GCA_006536005.1 | The Institute of Vegetables and Flowers<br>CAAS                                                                                                           |
| 1404 | <i>Piromyces finnis</i>                | Neocallimastigo | Chytridio | 9  | 12 | 10 | 0  | 31 | GCA_002104945.1 | Jet Propulsion Laboratory, California Institute of Technology<br>National Institute of Horticultural and Herbal Science, Rural Development Administration |
| 1405 | <i>Cordyceps javanica</i>              | Sordario        | Asco      | 7  | 7  | 5  | 11 | 30 | GCA_006981985.1 | INPART                                                                                                                                                    |
| 1406 | <i>Beauveria sp. IMV 00265</i>         | Sordario        | Asco      | 9  | 7  | 3  | 11 | 30 | GCA_001931865.2 | University of Minnesota<br>Shanghai Institutes for Biological Sciences, CAS                                                                               |
| 1407 | <i>Beauveria pseudobassiana</i>        | Sordario        | Asco      | 9  | 6  | 3  | 12 | 30 | GCA_003267905.1 | DOE Joint Genome Institute                                                                                                                                |
| 1408 | <i>Tolypocladium sp. Salcha MEA-2</i>  | Sordario        | Asco      | 7  | 7  | 6  | 10 | 30 | GCA_000750145.2 | UCIBIO-REQUIMTE, Faculdade de Ciencias e                                                                                                                  |
| 1409 | <i>Tolypocladium inflatum</i>          | Sordario        | Asco      | 7  | 7  | 6  | 10 | 30 | GCA_003945705.1 |                                                                                                                                                           |
| 1410 | <i>Beauveria brongniartii</i>          | Sordario        | Asco      | 9  | 7  | 3  | 11 | 30 | GCA_001636735.1 |                                                                                                                                                           |
| 1411 | <i>Acaromyces ingoldii</i>             | Exobasidio      | Basidio   | 4  | 13 | 4  | 9  | 30 | GCA_003144295.1 |                                                                                                                                                           |
| 1412 | <i>Leucosporidium scottii</i>          | Microbotryo     | Basidio   | 6  | 10 | 4  | 10 | 30 | GCA_003054985.1 |                                                                                                                                                           |

|      |                                      |            |         |    |    |    |    |    |                 |                                                                                          |
|------|--------------------------------------|------------|---------|----|----|----|----|----|-----------------|------------------------------------------------------------------------------------------|
| 1413 | <i>Albatrellus ellisii</i>           | Agarico    | Basidio | 10 | 5  | 4  | 11 | 30 | GCA_003314395.1 | Tecnologia, Universidade Nova da Lisboa                                                  |
| 1414 | <i>Ustilago bromivora</i>            | Ustilagino | Basidio | 4  | 10 | 8  | 8  | 30 | GCA_900101485.1 | Kunming University of Science and Technology                                             |
| 1415 | <i>Amanita thiersii</i>              | Agarico    | Basidio | 9  | 5  | 4  | 12 | 30 | GCA_002554575.1 | Institute of Bioinformatics and Systems Biology                                          |
| 1416 | <i>Leucoagaricus gongylophorus</i>   | Agarico    | Basidio | 9  | 2  | 7  | 12 | 30 | GCA_000382605.1 | JGI                                                                                      |
| 1417 | <i>Cordyceps pruinosa</i>            | Sordario   | Asco    | 7  | 7  | 4  | 11 | 29 | GCA_003025255.1 | UW-Madison                                                                               |
| 1418 | <i>Paecilomyces penicillatus</i>     | Sordario   | Asco    | 9  | 8  | 4  | 8  | 29 | GCA_005765155.1 | National Institute of Horticultural and Herbal Science, Rural Development Administration |
| 1419 | <i>Beauveria bassiana</i>            | Sordario   | Asco    | 9  | 5  | 3  | 12 | 29 | GCA_003337105.1 | Biotechnology and Nuclear Technology Research Institute                                  |
| 1420 | <i>Fonsecaea pedrosoi</i>            | Eurotio    | Asco    | 5  | 6  | 10 | 8  | 29 | GCA_000835455.1 | Biotechnology Institute- National University of Colombia- Bogota                         |
| 1421 | <i>Apiotrichum mycotoxinovorans</i>  | Tremello   | Basidio | 7  | 8  | 6  | 8  | 29 | GCA_013177335.1 | Broad Institute                                                                          |
| 1422 | <i>Escovopsis sp. TC</i>             | Sordario   | Asco    | 8  | 6  | 7  | 8  | 29 | GCA_003055185.1 | Nanjing TECH University                                                                  |
| 1423 | <i>Herpotrichiellaceae sp. UM238</i> | Eurotio    | Asco    | 9  | 6  | 1  | 13 | 29 | GCA_000315175.1 | University of East Anglia                                                                |
| 1424 | <i>Fonsecaea nubica</i>              | Eurotio    | Asco    | 5  | 7  | 9  | 8  | 29 | GCA_001646965.1 | UNIVERSITY OF MALAYA                                                                     |
| 1425 | <i>Cutaneotrichosporon dermatis</i>  | Tremello   | Basidio | 5  | 10 | 7  | 7  | 29 | GCA_003116895.1 | Federal University of Parana                                                             |
| 1426 | <i>Exophiala mesophila</i>           | Eurotio    | Asco    | 9  | 4  | 5  | 11 | 29 | GCA_000836275.1 | RIKEN Center for Life Science Technologies, Division of Genomic Technologies             |
| 1427 | <i>Peltaster fructicola</i>          | Dothideo   | Asco    | 4  | 11 | 6  | 8  | 29 | GCA_001592805.2 | Broad Institute                                                                          |
| 1428 | <i>Gyalolechia flavorubescens</i>    | Lecanoro   | Asco    | 8  | 6  | 5  | 10 | 29 | GCA_000442125.1 | Northwest A&F University                                                                 |
| 1429 | <i>Dioszegia crocea</i>              | Tremello   | Basidio | 5  | 10 | 9  | 5  | 29 | GCA_001600615.1 | Seoul National University                                                                |
| 1430 | <i>Arthrocladium fulminans</i>       | Eurotio    | Asco    | 8  | 8  | 4  | 9  | 29 | GCA_003614865.1 | RIKEN Center for Life Science Technologies, Division of Genomic Technologies             |
| 1431 | <i>Terfezia boudieri</i>             | Pezizo     | Asco    | 8  | 9  | 3  | 9  | 29 | GCA_003788615.2 | Westerdijk Fungal Biodiversity Institute                                                 |
| 1432 | <i>Paxillus involutus</i>            | Agarico    | Basidio | 8  | 5  | 4  | 12 | 29 | GCA_000827475.1 | DOE Joint Genome Institute                                                               |

|      |                                      |            |         |   |    |   |    |    |                 |                                                                                       |
|------|--------------------------------------|------------|---------|---|----|---|----|----|-----------------|---------------------------------------------------------------------------------------|
| 1433 | <i>Solicozozyma phenolica</i>        | Tremello   | Basidio | 5 | 11 | 6 | 7  | 29 | GCA_001600015.1 | RIKEN Center for Life Science Technologies, Division of Genomic Technologies          |
| 1434 | <i>Boletus sp. MG55</i>              | Agarico    | Basidio | 9 | 5  | 4 | 11 | 29 | GCA_003313885.1 | Kunming University of Science and Technology                                          |
| 1435 | <i>Retiboletus ornatipes</i>         | Agarico    | Basidio | 8 | 3  | 6 | 12 | 29 | GCA_003316065.1 | Kunming University of Science and Technology                                          |
| 1436 | <i>Tolypocladium paradoxum</i>       | Sordario   | Asco    | 8 | 5  | 5 | 10 | 28 | GCA_002916505.1 | Oregon State University                                                               |
| 1437 | <i>Fonsecaea monophora</i>           | Eurotio    | Asco    | 5 | 6  | 9 | 8  | 28 | GCA_001642475.1 | Federal University of Parana                                                          |
| 1438 | <i>Monascus ruber</i>                | Eurotio    | Asco    | 6 | 10 | 3 | 9  | 28 | GCA_002976275.1 | Fujian Institute of Microbiology                                                      |
| 1439 | <i>Bullera alba</i>                  | Tremello   | Basidio | 4 | 10 | 8 | 6  | 28 | GCA_001600095.1 | RIKEN Center for Life Science Technologies, Division of Genomic Technologies          |
| 1440 | <i>Sporisorium scitamineum</i>       | Ustilagino | Basidio | 4 | 11 | 6 | 7  | 28 | GCA_000772675.1 | Key Lab of Sugarcane Biology and Genetic Breeding, Ministry of Agriculture, P.R.China |
| 1441 | <i>Kwoniella heveanensis</i>         | Tremello   | Basidio | 6 | 9  | 5 | 8  | 28 | GCA_000507405.3 | Broad Institute                                                                       |
| 1442 | <i>Albatrellus sp. MG142</i>         | Agarico    | Basidio | 8 | 2  | 5 | 13 | 28 | GCA_003314695.1 | Kunming University of Science and Technology                                          |
| 1443 | <i>Suillus alpinus</i>               | Agarico    | Basidio | 8 | 4  | 5 | 11 | 28 | GCA_003316505.1 | Kunming University of Science and Technology                                          |
| 1444 | <i>Suillellus subvelutipes</i>       | Agarico    | Basidio | 9 | 2  | 3 | 14 | 28 | GCA_003316035.1 | Kunming University of Science and Technology                                          |
| 1445 | <i>Ustilago hordei</i>               | Ustilagino | Basidio | 4 | 9  | 8 | 7  | 28 | GCA_003012045.1 | Jawaharlal Nehru Centre for Advanced Scientific Research                              |
| 1446 | <i>Neoboletus brunneissimus</i>      | Agarico    | Basidio | 9 | 3  | 4 | 12 | 28 | GCA_003316195.1 | Kunming University of Science and Technology                                          |
| 1447 | <i>Hypomyces rosellus</i>            | Sordario   | Asco    | 7 | 4  | 8 | 8  | 27 | GCA_011799845.1 | Jilin Agricultural University                                                         |
| 1448 | <i>Metarhizium acridum</i>           | Sordario   | Asco    | 7 | 5  | 3 | 12 | 27 | GCA_000187405.1 | Metarhizium genome sequencing Consortium                                              |
| 1449 | <i>Tolypocladium ophioglossoides</i> | Sordario   | Asco    | 7 | 6  | 5 | 9  | 27 | GCA_001189435.1 | Oregon State University                                                               |
| 1450 | <i>Microcycluspora pomicola</i>      | Dothideo   | Asco    | 6 | 6  | 8 | 7  | 27 | GCA_002786065.1 | Northwest A&F University                                                              |
| 1451 | <i>Usnea hakonensis</i>              | Lecanoro   | Asco    | 9 | 5  | 1 | 12 | 27 | GCA_013423325.1 | Swedish Museum of Natural History                                                     |
| 1452 | <i>Gongronella sp. w5</i>            | Mucoro     | Mucoro  | 4 | 10 | 5 | 8  | 27 | GCA_001650995.1 | Anhui University                                                                      |
| 1453 | <i>Cladonia uncialis</i>             | Lecanoro   | Asco    | 8 | 4  | 3 | 12 | 27 | GCA_002927785.1 | University of Manitoba                                                                |

|      |                                       |            |         |   |    |   |    |    |                 |                                                                              |
|------|---------------------------------------|------------|---------|---|----|---|----|----|-----------------|------------------------------------------------------------------------------|
| 1454 | <i>Tuber calosporum</i>               | Pezizo     | Asco    | 8 | 8  | 1 | 10 | 27 | GCA_003316355.1 | Kunming University of Science and Technology                                 |
| 1455 | <i>Ustilago trichophora</i>           | Ustilagino | Basidio | 4 | 11 | 4 | 8  | 27 | GCA_900323505.1 | Technische Universitat Munchen - WZW                                         |
| 1456 | <i>Taiwanofungus camphoratus</i>      | Agarico    | Basidio | 9 | 3  | 6 | 9  | 27 | GCA_000766995.1 | Academia Sinica                                                              |
| 1457 | <i>Naganishia sp. IF7SW-B1</i>        | Tremello   | Basidio | 5 | 9  | 6 | 7  | 27 | GCA_012922685.1 | Jet Propulsion Laboratory, California Institute of Technology                |
| 1458 | <i>Naganishia adeliensis</i>          | Tremello   | Basidio | 5 | 9  | 6 | 7  | 27 | GCA_012922715.1 | Jet Propulsion Laboratory, California Institute of Technology                |
| 1459 | <i>Tylophilus plumbeoviolaceoides</i> | Agarico    | Basidio | 8 | 2  | 5 | 12 | 27 | GCA_003316375.1 | Kunming University of Science and Technology                                 |
| 1460 | <i>Rhizopogon vesiculosus</i>         | Agarico    | Basidio | 8 | 3  | 5 | 11 | 27 | GCA_001882365.1 | University of Florida                                                        |
| 1461 | <i>Auricularia polytricha</i>         | Agarico    | Basidio | 8 | 2  | 5 | 12 | 27 | GCA_003316125.1 | Kunming University of Science and Technology                                 |
| 1462 | <i>Papiliotrema laurentii</i>         | Tremello   | Basidio | 5 | 9  | 6 | 7  | 27 | GCA_012922615.1 | Jet Propulsion Laboratory, California Institute of Technology                |
| 1463 | <i>Rhizopogon sp. AM-2018a</i>        | Agarico    | Basidio | 8 | 4  | 5 | 10 | 27 | GCA_002995095.1 | Oregon State University                                                      |
| 1464 | <i>Suillus sp. MG131</i>              | Agarico    | Basidio | 8 | 5  | 5 | 9  | 27 | GCA_003313855.1 | Kunming University of Science and Technology                                 |
| 1465 | <i>Butyriboletus roseoflavus</i>      | Agarico    | Basidio | 8 | 3  | 4 | 12 | 27 | GCA_003315995.1 | Kunming University of Science and Technology                                 |
| 1466 | <i>Boletus speciosus</i>              | Agarico    | Basidio | 8 | 3  | 5 | 11 | 27 | GCA_003316055.1 | Kunming University of Science and Technology                                 |
| 1467 | <i>Floccularia luteovirens</i>        | Agarico    | Basidio | 9 | 3  | 5 | 10 | 27 | GCA_009739215.1 | Zhejiang University                                                          |
| 1468 | <i>Hypomyces perniciosus</i>          | Sordario   | Asco    | 7 | 5  | 6 | 8  | 26 | GCA_008477525.1 | Jilin Agricultural University                                                |
| 1469 | <i>Albophoma yamanashiensis</i>       | Sordario   | Asco    | 7 | 6  | 3 | 10 | 26 | GCA_001600555.1 | RIKEN Center for Life Science Technologies, Division of Genomic Technologies |
| 1470 | <i>Cordyceps cicadae</i>              | Sordario   | Asco    | 6 | 5  | 5 | 10 | 26 | GCA_010211705.1 | Anhui Agricultural University                                                |
| 1471 | <i>Metarhizium rileyi</i>             | Sordario   | Asco    | 7 | 5  | 3 | 11 | 26 | GCA_007866325.1 | Embrapa                                                                      |
| 1472 | <i>Metarhizium album</i>              | Sordario   | Asco    | 7 | 5  | 4 | 10 | 26 | GCA_000804445.1 | Shanghai Institutes for Biological Sciences, CAS                             |
| 1473 | <i>Hirsutella thompsonii</i>          | Sordario   | Asco    | 7 | 3  | 3 | 13 | 26 | GCA_000472145.1 | Institute of Microbial Technology                                            |
| 1474 | <i>Hirsutella minnesotensis</i>       | Sordario   | Asco    | 8 | 3  | 3 | 12 | 26 | GCA_000956045.1 | Institute of Microbiology, Chinese Academy of Sciences                       |
| 1475 | <i>Ceratocystiopsis brevicomis</i>    | Sordario   | Asco    | 5 | 9  | 2 | 10 | 26 | GCA_002778105.1 | University of Montana                                                        |

|      |                                 |            |         |    |    |   |    |    |                 |                                                                                          |
|------|---------------------------------|------------|---------|----|----|---|----|----|-----------------|------------------------------------------------------------------------------------------|
| 1476 | <i>Capronia epimyces</i>        | Eurotio    | Asco    | 7  | 4  | 4 | 11 | 26 | GCA_000585565.1 | Broad Institute                                                                          |
| 1477 | <i>Thermomyces lanuginosus</i>  | Eurotio    | Asco    | 8  | 3  | 3 | 12 | 26 | GCA_000315935.1 | Durban University of Technology                                                          |
| 1478 | <i>Ascospaera apis</i>          | Eurotio    | Asco    | 2  | 16 | 2 | 6  | 26 | GCA_001636715.1 | Shanghai Institutes for Biological Sciences, CAS                                         |
| 1479 | <i>Ustilago maydis</i>          | Ustilagino | Basidio | 5  | 6  | 6 | 9  | 26 | GCA_001599495.1 | RIKEN Center for Life Science Technologies, Division of Genomic Technologies             |
| 1480 | <i>Ustilago vetiveriae</i>      | Ustilagino | Basidio | 4  | 9  | 7 | 6  | 26 | GCA_001735935.1 | RWTH Aachen University                                                                   |
| 1481 | <i>Cryptococcus amyloletus</i>  | Tremello   | Basidio | 4  | 10 | 5 | 7  | 26 | GCA_001720205.1 | Broad Institute                                                                          |
| 1482 | <i>Cryptococcus floricola</i>   | Tremello   | Basidio | 4  | 10 | 5 | 7  | 26 | GCA_006352305.1 | Duke University                                                                          |
| 1483 | <i>Cryptococcus wingfieldii</i> | Tremello   | Basidio | 4  | 10 | 5 | 7  | 26 | GCA_001720155.1 | Broad Institute                                                                          |
| 1484 | <i>Kwoniella shandongensis</i>  | Tremello   | Basidio | 5  | 9  | 4 | 8  | 26 | GCA_008629635.1 | Broad Institute                                                                          |
| 1485 | <i>Rhizopogon vinicolor</i>     | Agarico    | Basidio | 8  | 2  | 5 | 11 | 26 | GCA_001658105.1 | DOE Joint Genome Institute                                                               |
| 1486 | <i>Boletus sp. MG95</i>         | Agarico    | Basidio | 7  | 5  | 3 | 11 | 26 | GCA_003313155.1 | Kunming University of Science and Technology                                             |
| 1487 | <i>Rhizopogon hawkeriae</i>     | Agarico    | Basidio | 8  | 4  | 4 | 10 | 26 | GCA_002995035.1 | Oregon State University                                                                  |
| 1488 | <i>Kwoniella bestiolae</i>      | Tremello   | Basidio | 5  | 9  | 4 | 8  | 26 | GCA_000512585.2 | Broad Institute                                                                          |
| 1489 | <i>Tricholoma matsutake</i>     | Agarico    | Basidio | 11 | 2  | 2 | 11 | 26 | GCA_002939025.2 | Korea University                                                                         |
| 1490 | <i>Cladobotryum protrusum</i>   | Sordario   | Asco    | 7  | 3  | 7 | 8  | 25 | GCA_004303015.1 | Jilin Agricultural University                                                            |
| 1491 | <i>Cordyceps tenuipes</i>       | Sordario   | Asco    | 6  | 5  | 4 | 10 | 25 | GCA_003025305.1 | National Institute of Horticultural and Herbal Science, Rural Development Administration |
| 1492 | <i>Hirsutella rhossiliensis</i> | Sordario   | Asco    | 6  | 4  | 4 | 11 | 25 | GCA_004142005.1 | Chinese Academy of Sciences                                                              |
| 1493 | <i>Cordyceps sp. RAO-2017</i>   | Sordario   | Asco    | 8  | 3  | 3 | 11 | 25 | GCA_002591385.1 | Utrecht University                                                                       |
| 1494 | <i>Trichosporon ovoides</i>     | Tremello   | Basidio | 6  | 4  | 5 | 10 | 25 | GCA_009833065.1 | Heilongjiang baiy agricultural university                                                |
| 1495 | <i>Escovopsis weberi</i>        | Sordario   | Asco    | 7  | 4  | 6 | 8  | 25 | GCA_003055145.1 | University of East Anglia                                                                |
| 1496 | <i>Rusavskia elegans</i>        | Lecanoro   | Asco    | 8  | 5  | 2 | 10 | 25 | GCA_011316305.1 | Yunnan Academy of Forestry                                                               |
| 1497 | <i>Evernia prunastri</i>        | Lecanoro   | Asco    | 8  | 4  | 2 | 11 | 25 | GCA_003184365.1 | Senckenberg                                                                              |
| 1498 | <i>Prillingera fragicola</i>    | Tremello   | Basidio | 5  | 6  | 6 | 8  | 25 | GCA_002335605.1 | RIKEN Center for Life Science Technologies, Division of Genomic Technologies             |
| 1499 | <i>Letharia columbiana</i>      | Lecanoro   | Asco    | 8  | 4  | 3 | 10 | 25 | GCA_014066305.1 | Eastern Washington University                                                            |
| 1500 | <i>Emmonsia crescens</i>        | Eurotio    | Asco    | 6  | 5  | 4 | 10 | 25 | GCA_002572855.1 | Broad Institute                                                                          |

|      |                                     |            |         |   |    |   |    |    |                 |                                                                                              |
|------|-------------------------------------|------------|---------|---|----|---|----|----|-----------------|----------------------------------------------------------------------------------------------|
| 1501 | <i>Naganishia liquefaciens</i>      | Tremello   | Basidio | 5 | 9  | 4 | 7  | 25 | GCA_013423385.1 | School of Life Science and Technology, Tokyo Institute of Technology                         |
| 1502 | <i>Boletus bicolor</i>              | Agarico    | Basidio | 8 | 2  | 5 | 10 | 25 | GCA_003316205.1 | Kunming University of Science and Technology                                                 |
| 1503 | <i>Rhizopogon parksii</i>           | Agarico    | Basidio | 8 | 4  | 3 | 10 | 25 | GCA_002994865.1 | Oregon State University                                                                      |
| 1504 | <i>Zoopogon insidians</i>           | Zoopago    | Zoopago | 1 | 17 | 2 | 5  | 25 | GCA_004114325.1 | University of Michigan                                                                       |
| 1505 | <i>Rhizopogon rudus</i>             | Agarico    | Basidio | 8 | 4  | 3 | 10 | 25 | GCA_002995055.1 | Oregon State University                                                                      |
| 1506 | <i>Caloboletus calopus</i>          | Agarico    | Basidio | 9 | 2  | 3 | 11 | 25 | GCA_003316085.1 | Kunming University of Science and Technology                                                 |
| 1507 | <i>Ramaria sp. MG151</i>            | Agarico    | Basidio | 9 | 2  | 2 | 12 | 25 | GCA_003314545.1 | Kunming University of Science and Technology                                                 |
| 1508 | <i>Cordyceps fumosorosea</i>        | Sordario   | Asco    | 6 | 4  | 4 | 10 | 24 | GCA_001636725.1 | Shanghai Institutes for Biological Sciences, CAS                                             |
| 1509 | <i>Cordyceps militaris</i>          | Sordario   | Asco    | 7 | 4  | 3 | 10 | 24 | GCA_003332165.1 | pangugene<br>RIKEN Center for Life Science Technologies,<br>Division of Genomic Technologies |
| 1510 | <i>Trichosporon coremiiforme</i>    | Tremello   | Basidio | 6 | 4  | 3 | 11 | 24 | GCA_001752605.1 | Division of Genomic Technologies                                                             |
| 1511 | <i>Dirinaria sp. GBRC AP01</i>      | Lecanoro   | Asco    | 8 | 3  | 2 | 11 | 24 | GCA_013315955.1 | Gujarat Biotechnology Research Centre                                                        |
| 1512 | <i>Leptoxyphium fumago</i>          | Dothideo   | Asco    | 6 | 5  | 4 | 9  | 24 | GCA_001660795.1 | International Institute Zittau - TU Dresden                                                  |
| 1513 | <i>Pseudevernia furfuracea</i>      | Lecanoro   | Asco    | 7 | 3  | 3 | 11 | 24 | GCA_003184345.1 | Senckenberg                                                                                  |
| 1514 | <i>Cutaneotrichosporon cutaneum</i> | Tremello   | Basidio | 5 | 5  | 6 | 8  | 24 | GCA_001600715.1 | RIKEN Center for Life Science Technologies,<br>Division of Genomic Technologies              |
| 1515 | <i>Ophiocordyceps australis</i>     | Sordario   | Asco    | 7 | 4  | 3 | 10 | 24 | GCA_002591415.1 | Utrecht University                                                                           |
| 1516 | <i>Thecaphora thlaspeos</i>         | Ustilagino | Basidio | 6 | 10 | 1 | 7  | 24 | GCA_900260175.1 | RWTH Aachen University                                                                       |
| 1517 | <i>Cladonia metacorallifera</i>     | Lecanoro   | Asco    | 7 | 5  | 3 | 9  | 24 | GCA_000482085.2 | Seoul National University                                                                    |
| 1518 | <i>Moniliella sp. 'wahieum'</i>     | Moniliello | Basidio | 4 | 9  | 0 | 11 | 24 | GCA_003971905.1 | Kyungpook National University                                                                |
| 1519 | <i>Suillus luteus</i>               | Agarico    | Basidio | 7 | 3  | 5 | 9  | 24 | GCA_000827255.1 | DOE Joint Genome Institute                                                                   |
| 1520 | <i>Tricholoma saponaceum</i>        | Agarico    | Basidio | 9 | 2  | 2 | 11 | 24 | GCA_003313625.1 | Kunming University of Science and Technology                                                 |
| 1521 | <i>Rhizopogon salebrosus</i>        | Agarico    | Basidio | 9 | 2  | 2 | 11 | 24 | GCA_002995475.1 | Oregon State University                                                                      |
| 1522 | <i>Naematelia encephala</i>         | Tremello   | Basidio | 4 | 8  | 5 | 7  | 24 | GCA_002105065.1 | DOE Joint Genome Institute                                                                   |
| 1523 | <i>Entoloma clypeatum</i>           | Agarico    | Basidio | 9 | 4  | 1 | 10 | 24 | GCA_900068945.1 | Royal Botanic Gardens, Kew                                                                   |
| 1524 | <i>Tricholoma terreum</i>           | Agarico    | Basidio | 8 | 3  | 2 | 11 | 24 | GCA_003316345.1 | Kunming University of Science and Technology                                                 |

|      |                                         |          |         |   |   |   |    |    |                 |                                                                              |
|------|-----------------------------------------|----------|---------|---|---|---|----|----|-----------------|------------------------------------------------------------------------------|
| 1525 | <i>Escovopsis sp. AC</i>                | Sordario | Asco    | 7 | 4 | 4 | 8  | 23 | GCA_003055955.1 | University of East Anglia                                                    |
| 1526 | <i>Blastomyces emzantsi</i>             | Eurotio  | Asco    | 6 | 4 | 4 | 9  | 23 | GCA_003206725.1 | National Institute for Communicable Diseases                                 |
| 1527 | <i>Trichosporon asahii</i>              | Tremello | Basidio | 6 | 4 | 3 | 10 | 23 | GCA_001972365.1 | RIKEN Center for Life Science Technologies, Division of Genomic Technologies |
| 1528 | <i>Apiotrichum gracile</i>              | Tremello | Basidio | 7 | 4 | 4 | 8  | 23 | GCA_001600335.1 | RIKEN Center for Life Science Technologies, Division of Genomic Technologies |
| 1529 | <i>Tolyocladium capitatum</i>           | Sordario | Asco    | 6 | 4 | 4 | 9  | 23 | GCA_002901185.1 | Oregon State University                                                      |
| 1530 | <i>Trichosporon faecale</i>             | Tremello | Basidio | 6 | 4 | 3 | 10 | 23 | GCA_001752585.1 | RIKEN Center for Life Science Technologies, Division of Genomic Technologies |
| 1531 | <i>Endocarpon pusillum</i>              | Eurotio  | Asco    | 7 | 3 | 1 | 12 | 23 | GCA_000611755.1 | Seoul National University                                                    |
| 1532 | <i>Elaphomyces granulatus</i>           | Eurotio  | Asco    | 6 | 4 | 3 | 10 | 23 | GCA_002240705.1 | Oregon State University                                                      |
| 1533 | <i>Letharia lupina</i>                  | Lecanoro | Asco    | 8 | 3 | 2 | 10 | 23 | GCA_014066315.1 | Eastern Washington University                                                |
| 1534 | <i>Jimgerdemannia lactiflua</i>         | Endogono | Mucoro  | 6 | 6 | 2 | 9  | 23 | GCA_003951145.1 | Oregon State University                                                      |
| 1535 | <i>Cladonia rangiferina</i>             | Lecanoro | Asco    | 7 | 4 | 2 | 10 | 23 | GCA_006146055.1 | Lake Superior State University                                               |
| 1536 | <i>Chaetothyriales sp. CBS 134920</i>   | Eurotio  | Asco    | 8 | 3 | 2 | 10 | 23 | GCA_003693665.1 | Westerdijk Fungal Biodiversity Institute                                     |
| 1537 | <i>Cutaneotrichosporon oleaginosum</i>  | Tremello | Basidio | 5 | 5 | 5 | 8  | 23 | GCA_008065305.1 | Ruhr-University Bochum                                                       |
| 1538 | <i>Ramalina peruviana</i>               | Lecanoro | Asco    | 7 | 4 | 2 | 10 | 23 | GCA_001956345.1 | Yunnan Academy of Forestry                                                   |
| 1539 | <i>Lichtheimia ramosa</i>               | Mucoro   | Mucoro  | 4 | 9 | 3 | 7  | 23 | GCA_000945115.1 | HKI JENA                                                                     |
| 1540 | <i>Cutaneotrichosporon arboriformis</i> | Tremello | Basidio | 5 | 4 | 4 | 10 | 23 | GCA_002335565.1 | RIKEN Center for Life Science Technologies, Division of Genomic Technologies |
| 1541 | <i>Naganishia randhawae</i>             | Tremello | Basidio | 5 | 7 | 3 | 8  | 23 | GCA_013461525.1 | Wits University                                                              |
| 1542 | <i>Rhizopogon vulgaris</i>              | Agarico  | Basidio | 8 | 1 | 3 | 11 | 23 | GCA_002995295.1 | Oregon State University                                                      |
| 1543 | <i>Hebeloma cylindrosporium</i>         | Agarico  | Basidio | 8 | 3 | 2 | 10 | 23 | GCA_000827355.1 | DOE Joint Genome Institute                                                   |
| 1544 | <i>Solicoccozyma terricola</i>          | Tremello | Basidio | 5 | 8 | 3 | 7  | 23 | GCA_001600875.1 | RIKEN Center for Life Science Technologies, Division of Genomic Technologies |
| 1545 | <i>Suillus brevipes</i>                 | Agarico  | Basidio | 7 | 3 | 4 | 9  | 23 | GCA_011800875.1 | DOE Joint Genome Institute                                                   |

|      |                                               |             |           |   |   |   |    |    |                 |                                                                                                         |
|------|-----------------------------------------------|-------------|-----------|---|---|---|----|----|-----------------|---------------------------------------------------------------------------------------------------------|
| 1546 | <i>Synchytrium microbalum</i>                 | Chytridio   | Chytridio | 8 | 4 | 1 | 10 | 23 | GCA_006535985.1 | Agriculture and Agri-Food Canada                                                                        |
| 1547 | <i>Rhizopogon villosulus</i>                  | Agarico     | Basidio   | 7 | 2 | 4 | 10 | 23 | GCA_002995315.1 | Oregon State University                                                                                 |
| 1548 | <i>Escovopsis sp. Ae720</i>                   | Sordario    | Asco      | 7 | 3 | 4 | 8  | 22 | GCA_003055925.1 | University of East Anglia                                                                               |
| 1549 | <i>Escovopsis sp. Ae733</i>                   | Sordario    | Asco      | 7 | 3 | 4 | 8  | 22 | GCA_003055945.1 | University of East Anglia                                                                               |
| 1550 | <i>Escovopsis sp. Ae724</i>                   | Sordario    | Asco      | 7 | 3 | 4 | 8  | 22 | GCA_003055165.1 | University of East Anglia                                                                               |
| 1551 | <i>Moelleriella libera</i>                    | Sordario    | Asco      | 5 | 4 | 4 | 9  | 22 | GCA_001636675.1 | Shanghai Institutes for Biological Sciences, CAS Institute of Microbiology, Chinese Academy of Sciences |
| 1552 | <i>Ophiocordyceps sinensis</i>                | Sordario    | Asco      | 6 | 2 | 2 | 12 | 22 | GCA_002077885.1 | DOE Joint Genome Institute                                                                              |
| 1553 | <i>Neohortaea acidophila</i>                  | Dothideo    | Asco      | 5 | 7 | 3 | 7  | 22 | GCA_010093505.1 | Seoul National University                                                                               |
| 1554 | <i>Umbilicaria muehlenbergii</i>              | Lecanoro    | Asco      | 8 | 2 | 2 | 10 | 22 | GCA_000611775.1 | Fujian Agriculture and Forestry University                                                              |
| 1555 | <i>Tremella fuciformis</i>                    | Tremello    | Basidio   | 5 | 3 | 7 | 7  | 22 | GCA_000987905.1 | RIKEN Center for Life Science Technologies, Division of Genomic Technologies                            |
| 1556 | <i>Leucosporidium creatinivorum</i>           | Microbotryo | Basidio   | 5 | 7 | 2 | 8  | 22 | GCA_001600635.1 | University of Frankfurt                                                                                 |
| 1557 | <i>Lasallia pustulata</i>                     | Lecanoro    | Asco      | 8 | 2 | 2 | 10 | 22 | GCA_008636195.1 | University of Melbourne                                                                                 |
| 1558 | <i>Syncephalastrum sp. IA-2019</i>            | Mucoro      | Mucoro    | 4 | 9 | 2 | 7  | 22 | GCA_013461545.1 | RIKEN Center for Life Science Technologies, Division of Genomic Technologies                            |
| 1559 | <i>Mrakia frigida</i>                         | Tremello    | Basidio   | 4 | 9 | 3 | 6  | 22 | GCA_001600395.1 | Beijing Institute of Radiation Medicine                                                                 |
| 1560 | <i>Emergomyces orientalis</i>                 | Eurotio     | Asco      | 6 | 4 | 2 | 10 | 22 | GCA_002110485.1 | Nilaparvata lugens Genome Consortium                                                                    |
| 1561 | <i>Nilaparvata lugens yeast-like symbiont</i> | 0           | Asco      | 6 | 3 | 3 | 10 | 22 | GCA_000758425.1 | Zhejiang Provincial Key Laboratory of Biometrology and Inspection & Quarantine                          |
| 1562 | <i>Ustilago esculenta</i>                     | Ustilagino  | Basidio   | 5 | 6 | 3 | 8  | 22 | GCA_000819925.1 | Senckenberg Broad Institute                                                                             |
| 1563 | <i>Lasallia hispanica</i>                     | Lecanoro    | Asco      | 8 | 2 | 2 | 10 | 22 | GCA_003254425.1 | RIKEN Center for Life Science Technologies, Division of Genomic Technologies                            |
| 1564 | <i>Blastomyces percursus</i>                  | Eurotio     | Asco      | 6 | 5 | 2 | 9  | 22 | GCA_001883805.1 | Kunming University of Science and Technology                                                            |
| 1565 | <i>Naganishia albida</i>                      | Tremello    | Basidio   | 5 | 6 | 4 | 7  | 22 | GCA_001599735.1 | RIKEN Center for Life Science Technologies,                                                             |
| 1566 | <i>Russula aff. compacta</i>                  | Agarico     | Basidio   | 7 | 0 | 2 | 13 | 22 | GCA_003313875.1 |                                                                                                         |
| 1567 | <i>Filobasidium wieringae</i>                 | Tremello    | Basidio   | 5 | 6 | 5 | 6  | 22 | GCA_001600055.1 |                                                                                                         |



|      |                                                    |             |         |   |    |   |    |    |                 |                                                                              |
|------|----------------------------------------------------|-------------|---------|---|----|---|----|----|-----------------|------------------------------------------------------------------------------|
| 1568 | <i>Ramaria cf. rubripermanens</i>                  | Agarico     | Basidio | 9 | 0  | 2 | 11 | 22 | GCA_003316465.1 | Division of Genomic Technologies                                             |
| 1569 | <i>Hygrophorus pudorinus</i>                       | Agarico     | Basidio | 6 | 4  | 1 | 11 | 22 | GCA_003314045.1 | Kunming University of Science and Technology                                 |
| 1570 | <i>Trichosporon inkin</i>                          | Tremello    | Basidio | 6 | 4  | 2 | 9  | 21 | GCA_001752625.1 | Kunming University of Science and Technology                                 |
| 1571 | <i>Dissoconium aciculare</i>                       | Dothideo    | Asco    | 5 | 3  | 5 | 8  | 21 | GCA_010015565.1 | RIKEN Center for Life Science Technologies, Division of Genomic Technologies |
| 1572 | <i>Drechmeria coniospora</i>                       | Sordario    | Asco    | 6 | 5  | 1 | 9  | 21 | GCA_001625195.1 | DOE Joint Genome Institute                                                   |
| 1573 | <i>Ramalina intermedia</i>                         | Lecanoro    | Asco    | 6 | 4  | 2 | 9  | 21 | GCA_003073195.1 | Biotechnology Research Institute, Chinese Academy of Agricultural Sciences   |
| 1574 | <i>Syncephalastrum monosporum</i>                  | Mucoro      | Mucoro  | 4 | 9  | 2 | 6  | 21 | GCA_000697355.1 | Yunnan Academy of Forestry                                                   |
| 1575 | <i>Chaetothyriales sp. CBS 135597</i>              | Eurotio     | Asco    | 7 | 3  | 1 | 10 | 21 | GCA_003709825.1 | IGS                                                                          |
| 1576 | <i>Cladonia macilenta</i>                          | Lecanoro    | Asco    | 5 | 5  | 3 | 8  | 21 | GCA_000444155.1 | Westerdijk Fungal Biodiversity Institute                                     |
| 1577 | <i>Cerataphis brasiliensis yeast-like symbiont</i> | 0           | Asco    | 6 | 3  | 2 | 10 | 21 | GCA_000372705.1 | Seoul National University                                                    |
| 1578 | <i>Rhodotorula paludigena</i>                      | Microbotryo | Basidio | 5 | 3  | 2 | 11 | 21 | GCA_005281665.1 | University of Arizona                                                        |
| 1579 | <i>Emergomyces pasteurianus</i>                    | Eurotio     | Asco    | 7 | 2  | 2 | 10 | 21 | GCA_001883825.1 | Suranaree University of Technology                                           |
| 1580 | <i>Paxillus rubicundulus</i>                       | Agarico     | Basidio | 6 | 3  | 4 | 8  | 21 | GCA_000827395.1 | Broad Institute                                                              |
| 1581 | <i>Blastomyces silverae</i>                        | Eurotio     | Asco    | 6 | 4  | 2 | 9  | 21 | GCA_001014755.1 | DOE Joint Genome Institute                                                   |
| 1582 | <i>Phlebopus portentosus</i>                       | Agarico     | Basidio | 7 | 2  | 1 | 11 | 21 | GCA_000766925.2 | Broad Institute                                                              |
| 1583 | <i>Blastomyces gilchristii</i>                     | Eurotio     | Asco    | 7 | 3  | 2 | 9  | 21 | GCA_000003855.2 | Yunnan University                                                            |
| 1584 | <i>Neoboletus magnificus</i>                       | Agarico     | Basidio | 7 | 1  | 2 | 11 | 21 | GCA_003316145.1 | Broad Institute                                                              |
| 1585 | <i>Melampsora pinitorqua</i>                       | Puccinio    | Basidio | 5 | 10 | 3 | 3  | 21 | GCA_000464645.1 | Kunming University of Science and Technology                                 |
| 1586 | <i>Sarcodon aspratus</i>                           | Agarico     | Basidio | 6 | 2  | 4 | 9  | 21 | GCA_003313825.1 | Tree Aggressors Identification using Genomic Approaches                      |
| 1587 | <i>Kwoniella dejecticola</i>                       | Tremello    | Basidio | 4 | 7  | 3 | 7  | 21 | GCA_000512565.2 | Kunming University of Science and Technology                                 |
| 1588 | <i>Hypocrella siamensis</i>                        | Sordario    | Asco    | 5 | 3  | 3 | 9  | 20 | GCA_000731825.1 | Broad Institute                                                              |
| 1589 | <i>Quambalaria eucalypti</i>                       | Exobasidio  | Basidio | 3 | 8  | 1 | 8  | 20 | GCA_004016185.1 | CSIR- Institute of Microbial technology (IMTECH)                             |

|      |                                        |            |         |   |   |   |    |    |                 |                                                                              |
|------|----------------------------------------|------------|---------|---|---|---|----|----|-----------------|------------------------------------------------------------------------------|
| 1590 | <i>Jimgerdemannia flammicorona</i>     | Endogono   | Mucoro  | 4 | 4 | 3 | 9  | 20 | GCA_003990745.1 | DOE Joint Genome Institute                                                   |
| 1591 | <i>Lichtheimia corymbifera</i>         | Mucoro     | Mucoro  | 3 | 8 | 2 | 7  | 20 | GCA_000697175.1 | IGS                                                                          |
| 1592 | <i>Syncephalastrum racemosum</i>       | Mucoro     | Mucoro  | 4 | 9 | 1 | 6  | 20 | GCA_002105135.1 | DOE Joint Genome Institute                                                   |
| 1593 | <i>Hygrocybe conica</i>                | Agarico    | Basidio | 6 | 5 | 2 | 7  | 20 | GCA_900068975.1 | Royal Botanic Gardens, Kew                                                   |
| 1594 | <i>Jaminaea rosea</i>                  | Exobasidio | Basidio | 3 | 8 | 1 | 8  | 20 | GCA_003144245.1 | DOE Joint Genome Institute                                                   |
| 1595 | <i>Blastomyces parvus</i>              | Eurotio    | Asco    | 6 | 4 | 2 | 8  | 20 | GCA_002572885.1 | Broad Institute                                                              |
| 1596 | <i>Antarctomyces pellizariae</i>       | Leotio     | Asco    | 8 | 4 | 0 | 8  | 20 | GCA_010623925.1 | UFMG - Universidade Federal de Minas Gerais                                  |
| 1597 | <i>Blastomyces dermatitidis</i>        | Eurotio    | Asco    | 6 | 3 | 2 | 9  | 20 | GCA_000003525.2 | Broad Institute                                                              |
| 1598 | <i>Pseudomicrostroma glucosiphilum</i> | Exobasidio | Basidio | 5 | 3 | 4 | 8  | 20 | GCA_003144135.1 | DOE Joint Genome Institute                                                   |
| 1599 | <i>Rhizopus oryzae</i>                 | Mucoro     | Mucoro  | 6 | 6 | 0 | 8  | 20 | GCA_000697195.1 | IGS                                                                          |
| 1600 | <i>Lactarius trivialis</i>             | Agarico    | Basidio | 7 | 0 | 1 | 12 | 20 | GCA_003315845.1 | Kunming University of Science and Technology                                 |
| 1601 | <i>Russula griseocarnosa</i>           | Agarico    | Basidio | 6 | 0 | 1 | 13 | 20 | GCA_004801975.1 | Research Institute of Tropical Forestry, Chinese Academy of Forestry         |
| 1602 | <i>Holtermanniella nyarrowii</i>       | Tremello   | Basidio | 4 | 8 | 3 | 5  | 20 | GCA_001600035.1 | RIKEN Center for Life Science Technologies, Division of Genomic Technologies |
| 1603 | <i>Tricholoma sp. MG77</i>             | Agarico    | Basidio | 7 | 2 | 0 | 11 | 20 | GCA_003314665.1 | Kunming University of Science and Technology                                 |
| 1604 | <i>Lactifluus pinguis</i>              | Agarico    | Basidio | 7 | 0 | 0 | 13 | 20 | GCA_003313945.1 | Kunming University of Science and Technology                                 |
| 1605 | <i>Lactifluus rugatus</i>              | Agarico    | Basidio | 6 | 1 | 1 | 12 | 20 | GCA_003315895.1 | Kunming University of Science and Technology                                 |
| 1606 | <i>Lactifluus hygrophoroides</i>       | Agarico    | Basidio | 6 | 0 | 1 | 13 | 20 | GCA_003314055.1 | Kunming University of Science and Technology                                 |
| 1607 | <i>Gomphus bonarii</i>                 | Agarico    | Basidio | 8 | 0 | 1 | 11 | 20 | GCA_003316585.1 | Kunming University of Science and Technology                                 |
| 1608 | <i>Erysiphe pulchra</i>                | Leotio     | Asco    | 4 | 7 | 3 | 6  | 20 | GCA_002918395.1 | USDA-ARS                                                                     |
| 1609 | <i>Takashimella tepidaria</i>          | Tremello   | Basidio | 4 | 6 | 3 | 7  | 20 | GCA_003116915.1 | RIKEN Center for Life Science Technologies, Division of Genomic Technologies |
| 1610 | <i>Gomphus sp. MG54</i>                | Agarico    | Basidio | 8 | 0 | 0 | 12 | 20 | GCA_003314385.1 | Kunming University of Science and Technology                                 |
| 1611 | <i>Pyrrhoderma noxium</i>              | Agarico    | Basidio | 7 | 3 | 1 | 9  | 20 | GCA_002287475.2 | Academia Sinica                                                              |

|      |                                              |             |           |   |   |   |    |    |                 |                                                                                                                 |
|------|----------------------------------------------|-------------|-----------|---|---|---|----|----|-----------------|-----------------------------------------------------------------------------------------------------------------|
| 1612 | <i>Ophiocordyceps polyrhachis-furcata</i>    | Sordario    | Asco      | 4 | 4 | 5 | 6  | 19 | GCA_001633055.2 | National Center for Genetic Engineering and Biotechnology (BIOTEC)                                              |
| 1613 | <i>Oph. camponoti-leonardi (nom. inval.)</i> | Sordario    | Asco      | 5 | 4 | 3 | 7  | 19 | GCA_003339455.1 | National Center for Genetic Engineering and Biotechnology                                                       |
| 1614 | <i>Alectoria sarmentosa</i>                  | Lecanoro    | Asco      | 6 | 3 | 2 | 8  | 19 | GCA_009733775.1 | Universidad Complutense de Madrid                                                                               |
| 1615 | <i>Rhizoclostridium globosum</i>             | Chytridio   | Chytridio | 6 | 5 | 0 | 8  | 19 | GCA_002104985.1 | DOE Joint Genome Institute                                                                                      |
| 1616 | <i>Cutaneotrichosporon curvatum</i>          | Tremello    | Basidio   | 5 | 3 | 4 | 7  | 19 | GCA_001600275.1 | RIKEN Center for Life Science Technologies, Division of Genomic Technologies                                    |
| 1617 | <i>Cutaneotrichosporon cyanovorans</i>       | Tremello    | Basidio   | 5 | 2 | 4 | 8  | 19 | GCA_002335625.1 | RIKEN Center for Life Science Technologies, Division of Genomic Technologies                                    |
| 1618 | <i>Rhizomucor pusillus</i>                   | Mucoro      | Mucoro    | 4 | 8 | 1 | 6  | 19 | GCA_900175165.2 | CHALMERS UNIVERSITY OF TECHNOLOGY                                                                               |
| 1619 | <i>Rhodotorula graminis</i>                  | Microbotryo | Basidio   | 4 | 4 | 3 | 8  | 19 | GCA_001329695.1 | DOE Joint Genome Institute                                                                                      |
| 1620 | <i>Suillus placidus</i>                      | Agarico     | Basidio   | 6 | 2 | 3 | 8  | 19 | GCA_003313645.1 | Kunming University of Science and Technology                                                                    |
| 1621 | <i>Rhizopus delemar</i>                      | Mucoro      | Mucoro    | 6 | 5 | 0 | 8  | 19 | GCA_000149305.1 | Broad Institute                                                                                                 |
| 1622 | <i>Phycomyces blakesleeanus</i>              | Mucoro      | Mucoro    | 5 | 5 | 1 | 8  | 19 | GCA_001638985.2 | JGI-PSF                                                                                                         |
| 1623 | <i>Lactarius echinatus</i>                   | Agarico     | Basidio   | 6 | 1 | 1 | 11 | 19 | GCA_003315975.1 | Kunming University of Science and Technology                                                                    |
| 1624 | <i>Laccaria amethystina</i>                  | Agarico     | Basidio   | 7 | 1 | 1 | 10 | 19 | GCA_000827195.1 | DOE Joint Genome Institute                                                                                      |
| 1625 | <i>Apiotrichum montevidense</i>              | Tremello    | Basidio   | 6 | 2 | 3 | 7  | 18 | GCA_001598995.1 | RIKEN Center for Life Science Technologies, Division of Genomic Technologies                                    |
| 1626 | <i>Apiotrichum domesticum</i>                | Tremello    | Basidio   | 5 | 2 | 3 | 8  | 18 | GCA_001599015.1 | RIKEN Center for Life Science Technologies, Division of Genomic Technologies                                    |
| 1627 | <i>Rhizomucor miehei</i>                     | Mucoro      | Mucoro    | 3 | 7 | 2 | 6  | 18 | GCA_000611695.1 | Department of Biotechnology, College of Food Science and Nutritional Engineering, China Agricultural University |

|      |                                           |               |           |   |   |   |    |    |                 |                                                                              |
|------|-------------------------------------------|---------------|-----------|---|---|---|----|----|-----------------|------------------------------------------------------------------------------|
| 1628 | <i>Lactarius indigo</i>                   | Agarico       | Basidio   | 5 | 1 | 1 | 11 | 18 | GCA_003313985.1 | Kunming University of Science and Technology                                 |
| 1629 | <i>Ceraceosorus guamensis</i>             | Exobasidio    | Basidio   | 3 | 5 | 1 | 9  | 18 | GCA_003144195.1 | DOE Joint Genome Institute                                                   |
| 1630 | <i>Cystobasidiopsis lactophilus</i>       | Agaricostilbo | Basidio   | 7 | 1 | 1 | 9  | 18 | GCA_001599975.1 | RIKEN Center for Life Science Technologies, Division of Genomic Technologies |
| 1631 | <i>Chytriomycetes confervae</i>           | Chytridio     | Chytridio | 3 | 6 | 2 | 7  | 18 | GCA_006535975.1 | Agriculture and Agri-Food Canada                                             |
| 1632 | <i>Symmetrospora coprosmae</i>            | Cystobasidio  | Basidio   | 4 | 4 | 2 | 8  | 18 | GCA_008802785.1 | University College Dublin                                                    |
| 1633 | <i>Lactarius hatsudake</i>                | Agarico       | Basidio   | 5 | 1 | 1 | 11 | 18 | GCA_003315955.1 | Kunming University of Science and Technology                                 |
| 1634 | <i>Erythrobasidium yunnanense</i>         | Cystobasidio  | Basidio   | 4 | 3 | 3 | 8  | 18 | GCA_001600175.1 | RIKEN Center for Life Science Technologies, Division of Genomic Technologies |
| 1635 | <i>Cetradonia linearis</i>                | Lecanoro      | Asco      | 5 | 2 | 1 | 10 | 18 | GCA_003521265.1 | The New York Botanical Garden                                                |
| 1636 | <i>Protomyces macrosporus</i>             | Taphrino      | Asco      | 4 | 7 | 2 | 5  | 18 | GCA_003717175.1 | University of Helsinki                                                       |
| 1637 | <i>Lactarius sp. MG121</i>                | Agarico       | Basidio   | 5 | 1 | 1 | 11 | 18 | GCA_003315925.1 | Kunming University of Science and Technology                                 |
| 1638 | <i>Thelephora aurantiotincta</i>          | Agarico       | Basidio   | 6 | 0 | 2 | 10 | 18 | GCA_003316405.1 | Kunming University of Science and Technology                                 |
| 1639 | <i>Pulveroboletus ravenelii</i>           | Agarico       | Basidio   | 5 | 2 | 2 | 9  | 18 | GCA_003316545.1 | Kunming University of Science and Technology                                 |
| 1640 | <i>Laccaria bicolor</i>                   | Agarico       | Basidio   | 6 | 1 | 0 | 11 | 18 | GCA_000143565.1 | Laccaria Genome Consortium                                                   |
| 1641 | <i>Russula virescens</i>                  | Agarico       | Basidio   | 5 | 0 | 1 | 12 | 18 | GCA_003316435.1 | Kunming University of Science and Technology                                 |
| 1642 | <i>Microbotryum silenes-acaulis</i>       | Microbotryyo  | Basidio   | 4 | 4 | 1 | 9  | 18 | GCA_003665825.1 | Universite Paris Sud                                                         |
| 1643 | <i>Microbotryum silenes-dioicae</i>       | Microbotryyo  | Basidio   | 5 | 3 | 1 | 9  | 18 | GCA_900120095.1 | ESE                                                                          |
| 1644 | <i>Phaeotremella skinneri</i>             | Tremello      | Basidio   | 5 | 4 | 2 | 7  | 18 | GCA_001599695.1 | RIKEN Center for Life Science Technologies, Division of Genomic Technologies |
| 1645 | <i>Tricholoma bakamatsutake</i>           | Agarico       | Basidio   | 8 | 0 | 1 | 9  | 18 | GCA_003313665.1 | Kunming University of Science and Technology                                 |
| 1646 | <i>Chroogomphus rutilus</i>               | Agarico       | Basidio   | 6 | 0 | 2 | 10 | 18 | GCA_003314275.1 | Kunming University of Science and Technology                                 |
| 1647 | <i>Ophiocordyceps camponoti-rufipedis</i> | Sordario      | Asco      | 3 | 4 | 3 | 7  | 17 | GCA_002591395.1 | Utrecht University                                                           |
| 1648 | <i>Ophiocordyceps camponoti-floridani</i> | Sordario      | Asco      | 3 | 4 | 3 | 7  | 17 | GCA_012980515.1 | University of Central Florida                                                |

|      |                                                         |             |         |   |   |   |    |    |                 |                                                                              |
|------|---------------------------------------------------------|-------------|---------|---|---|---|----|----|-----------------|------------------------------------------------------------------------------|
| 1649 | <i>Ophiocordyceps unilateralis</i>                      | Sordario    | Asco    | 4 | 3 | 3 | 7  | 17 | GCA_001272575.2 | Utrecht University                                                           |
| 1650 | <i>Chaetothyriales sp. CBS 134916</i>                   | Eurotio     | Asco    | 6 | 0 | 2 | 9  | 17 | GCA_003709845.1 | Westerdijk Fungal Biodiversity Institute                                     |
| 1651 | <i>Tilletiopsis washingtonensis</i>                     | Exobasidio  | Basidio | 2 | 6 | 2 | 7  | 17 | GCA_003144115.1 | DOE Joint Genome Institute                                                   |
| 1652 | <i>Apiotrichum brassicae</i>                            | Tremello    | Basidio | 4 | 2 | 4 | 7  | 17 | GCA_001600295.1 | RIKEN Center for Life Science Technologies, Division of Genomic Technologies |
| 1653 | <i>Podosphaera leucotricha</i>                          | Leotio      | Asco    | 4 | 3 | 2 | 8  | 17 | GCA_013170925.1 | Washington State University                                                  |
| 1654 | <i>Salmacisia buchloeana</i>                            | Exobasidio  | Basidio | 7 | 2 | 0 | 8  | 17 | GCA_001990185.1 | Pennsylvania State University                                                |
| 1655 | <i>Thermomucor indicae-seudaticae</i>                   | Mucoro      | Mucoro  | 3 | 5 | 3 | 6  | 17 | GCA_000787465.1 | Aalborg University                                                           |
| 1656 | <i>Mucor racemosus</i>                                  | Mucoro      | Mucoro  | 4 | 3 | 1 | 9  | 17 | GCA_000697255.1 | IGS                                                                          |
| 1657 | <i>Tilletiaria anomala</i>                              | Exobasidio  | Basidio | 4 | 4 | 1 | 8  | 17 | GCA_000711695.1 | DOE Joint Genome Institute                                                   |
| 1658 | <i>Paracoccidioides lutzii</i>                          | Eurotio     | Asco    | 4 | 2 | 3 | 8  | 17 | GCA_000150705.2 | Broad Institute                                                              |
| 1659 | <i>Rhizopus stolonifer</i>                              | Mucoro      | Mucoro  | 5 | 3 | 1 | 8  | 17 | GCA_000697035.1 | IGS                                                                          |
| 1660 | <i>Russula foetens</i>                                  | Agarico     | Basidio | 5 | 0 | 1 | 11 | 17 | GCA_003316565.1 | Kunming University of Science and Technology                                 |
| 1661 | <i>Rhizopus azygosporus</i>                             | Mucoro      | Mucoro  | 6 | 2 | 0 | 9  | 17 | GCA_003325435.1 | University of California, Riverside                                          |
| 1662 | <i>Rhizopus microsporus</i>                             | Mucoro      | Mucoro  | 6 | 2 | 0 | 9  | 17 | GCA_006680115.1 | TGen-North                                                                   |
| 1663 | <i>Choanephora cucurbitarum</i>                         | Mucoro      | Mucoro  | 4 | 4 | 0 | 9  | 17 | GCA_001683725.1 | Korea University                                                             |
| 1664 | <i>Rhizopogon fuscorubens</i>                           | Agarico     | Basidio | 6 | 1 | 2 | 8  | 17 | GCA_002995455.1 | Oregon State University                                                      |
| 1665 | <i>Microbotryum intermedium</i>                         | Microbotryo | Basidio | 4 | 3 | 1 | 9  | 17 | GCA_900096595.1 | ESE                                                                          |
| 1666 | <i>Tricholoma flavovirens</i>                           | Agarico     | Basidio | 5 | 0 | 2 | 10 | 17 | GCA_003313805.1 | Kunming University of Science and Technology                                 |
| 1667 | <i>Tricholoma sp. MG99</i>                              | Agarico     | Basidio | 8 | 0 | 1 | 8  | 17 | GCA_003521275.1 | Kunming University of Science and Technology                                 |
| 1668 | <i>Wallemia hederæ</i>                                  | Wallemio    | Basidio | 7 | 2 | 0 | 8  | 17 | GCA_004918325.1 | Biotechnical Faculty, University of Ljubljana                                |
| 1669 | <i>Phellinus lamaoensis</i>                             | Agarico     | Basidio | 6 | 1 | 1 | 9  | 17 | GCA_002794735.1 | Academia Sinica                                                              |
| 1670 | <i>Chrysosporium queenslandicum</i>                     | Eurotio     | Asco    | 3 | 1 | 2 | 10 | 16 | GCA_001430955.1 | UC Berkeley                                                                  |
| 1671 | <i>Ophiocordyceps camponoti-saundersi (nom. inval.)</i> | Sordario    | Asco    | 4 | 3 | 3 | 6  | 16 | GCA_003339415.1 | National Center for Genetic Engineering and Biotechnology                    |
| 1672 | <i>Vanrija humicola</i>                                 | Tremello    | Basidio | 4 | 3 | 2 | 7  | 16 | GCA_008065275.1 | Ruhr-University Bochum                                                       |
| 1673 | <i>Basidiobolus meristosporus</i>                       | Basidiobolo | Zoopago | 5 | 2 | 0 | 9  | 16 | GCA_002104905.1 | DOE Joint Genome Institute                                                   |
| 1674 | <i>Chaetothyriales sp. CBS 132003</i>                   | Eurotio     | Asco    | 6 | 0 | 1 | 9  | 16 | GCA_003709865.1 | Westerdijk Fungal Biodiversity Institute                                     |

|      |                                        |              |           |   |   |   |    |    |                 |                                                          |
|------|----------------------------------------|--------------|-----------|---|---|---|----|----|-----------------|----------------------------------------------------------|
| 1675 | <i>Aspergillus cejpilii</i>            | Eurotio      | Asco      | 5 | 3 | 0 | 8  | 16 | GCA_004769165.1 | Guangdong Institute of Microbiology                      |
| 1676 | <i>Lactarius sp. MG50</i>              | Agarico      | Basidio   | 5 | 0 | 1 | 10 | 16 | GCA_003314065.1 | Kunming University of Science and Technology             |
| 1677 | <i>Tilletia caries</i>                 | Exobasidio   | Basidio   | 3 | 4 | 1 | 8  | 16 | GCA_001645005.2 | Agriculture and Agri-Food Canada                         |
| 1678 | <i>Xeromyces bisporus</i>              | Eurotio      | Asco      | 5 | 3 | 1 | 7  | 16 | GCA_900006255.1 | UPPSALA UNIVERSITET                                      |
| 1679 | <i>Rhodotorula diobovata</i>           | Microbotryo  | Basidio   | 4 | 2 | 2 | 8  | 16 | GCA_006352295.1 | University of Manitoba                                   |
| 1680 | <i>Mucor velutinosus</i>               | Mucoro       | Mucoro    | 4 | 1 | 2 | 9  | 16 | GCA_000696895.1 | IGS                                                      |
| 1681 | <i>Mrakia psychrophila</i>             | Tremello     | Basidio   | 3 | 4 | 4 | 5  | 16 | GCA_001889225.1 | Institute Of Microbiology<br>Chinese Academy of Sciences |
| 1682 | <i>Histoplasma capsulatum</i>          | Eurotio      | Asco      | 4 | 3 | 2 | 7  | 16 | GCA_000313325.1 | Taipei Medical University                                |
| 1683 | <i>Rhodotorula toruloides</i>          | Microbotryo  | Basidio   | 4 | 1 | 2 | 9  | 16 | GCA_001255795.1 | UCB                                                      |
| 1684 | <i>Cystobasidiaceae sp. HBUAS51001</i> | Cystobasidio | Basidio   | 5 | 1 | 3 | 7  | 16 | GCA_003351005.1 | Hubei University of Arts and Science                     |
| 1685 | <i>Protomyces lactucaedebilis</i>      | Taphrino     | Asco      | 5 | 5 | 1 | 5  | 16 | GCA_002105105.1 | DOE Joint Genome Institute                               |
| 1686 | <i>Caulochytrium protostelioides</i>   | Chytridio    | Chytridio | 5 | 1 | 1 | 9  | 16 | GCA_003615045.1 | DOE Joint Genome Institute                               |
| 1687 | <i>Piloderma croceum</i>               | Agarico      | Basidio   | 7 | 2 | 0 | 7  | 16 | GCA_000827315.1 | DOE Joint Genome Institute                               |
| 1688 | <i>Endogone sp. FLAS-F59071</i>        | Endogono     | Mucoro    | 4 | 3 | 1 | 8  | 16 | GCA_003990785.1 | DOE Joint Genome Institute                               |
| 1689 | <i>Protomyces inouyei</i>              | Taphrino     | Asco      | 5 | 5 | 1 | 5  | 16 | GCA_003717155.1 | University of Helsinki                                   |
| 1690 | <i>Lactarius deliciosus</i>            | Agarico      | Basidio   | 5 | 0 | 0 | 11 | 16 | GCA_006680135.1 | UCSI University                                          |
| 1691 | <i>Microbotryum saponariae</i>         | Microbotryo  | Basidio   | 5 | 2 | 1 | 8  | 16 | GCA_900102585.1 | ESE                                                      |
| 1692 | <i>Cryptococcus neoformans</i>         | Tremello     | Basidio   | 3 | 4 | 2 | 7  | 16 | GCA_002216725.1 | Washington University in St. Louis                       |
| 1693 | <i>Lactarius volemus</i>               | Agarico      | Basidio   | 4 | 0 | 1 | 11 | 16 | GCA_003315835.1 | Kunming University of Science and Technology             |
| 1694 | <i>Russula abietina</i>                | Agarico      | Basidio   | 4 | 0 | 1 | 11 | 16 | GCA_003313715.1 | Kunming University of Science and Technology             |
| 1695 | <i>Russula lepida</i>                  | Agarico      | Basidio   | 5 | 0 | 1 | 10 | 16 | GCA_003316425.1 | Kunming University of Science and Technology             |
| 1696 | <i>Lactarius piperatus</i>             | Agarico      | Basidio   | 5 | 0 | 0 | 11 | 16 | GCA_003315875.1 | Kunming University of Science and Technology             |
| 1697 | <i>Scleroderma citrinum</i>            | Agarico      | Basidio   | 4 | 1 | 3 | 8  | 16 | GCA_000827425.1 | DOE Joint Genome Institute                               |
| 1698 | <i>Hygrophorus russula</i>             | Agarico      | Basidio   | 4 | 1 | 2 | 9  | 16 | GCA_003314125.1 | Kunming University of Science and Technology             |
| 1699 | <i>Mortierella alpina</i>              | Mortierello  | Mucoro    | 3 | 3 | 2 | 7  | 15 | GCA_000507065.1 | IGS                                                      |
| 1700 | <i>Tilletia controversa</i>            | Exobasidio   | Basidio   | 3 | 3 | 1 | 8  | 15 | GCA_001645045.2 | Agriculture and Agri-Food Canada                         |

|      |                                      |              |           |   |   |   |   |    |                 |                                                                                       |
|------|--------------------------------------|--------------|-----------|---|---|---|---|----|-----------------|---------------------------------------------------------------------------------------|
| 1701 | <i>Ceraceosorus bombacis</i>         | Exobasidio   | Basidio   | 3 | 3 | 1 | 8 | 15 | GCA_900000165.1 | IPF                                                                                   |
| 1702 | <i>Mucor ambiguus</i>                | Mucoro       | Mucoro    | 5 | 1 | 0 | 9 | 15 | GCA_000950595.1 | National Institute of<br>Advanced Industrial<br>Science and Technology<br>(AIST)      |
| 1703 | <i>Emmonsia sp. CAC-2015a</i>        | Eurotio      | Asco      | 3 | 3 | 2 | 7 | 15 | GCA_001660665.1 | Broad Institute                                                                       |
| 1704 | <i>Tilletia walkeri</i>              | Exobasidio   | Basidio   | 3 | 3 | 1 | 8 | 15 | GCA_009428295.1 | Agriculture and Agri-<br>Food Canada                                                  |
| 1705 | <i>Xylona heveae</i>                 | Xylono       | Asco      | 5 | 1 | 0 | 9 | 15 | GCA_001619985.1 | DOE Joint Genome<br>Institute                                                         |
| 1706 | <i>Paracoccidioides brasiliensis</i> | Eurotio      | Asco      | 3 | 2 | 3 | 7 | 15 | GCA_000150475.2 | Broad Institute                                                                       |
| 1707 | <i>Mucor irregularis</i>             | Mucoro       | Mucoro    | 4 | 1 | 1 | 9 | 15 | GCA_000587855.1 | Nanjing Biozeron                                                                      |
| 1708 | <i>Actinomucor elegans</i>           | Mucoro       | Mucoro    | 5 | 1 | 0 | 9 | 15 | GCA_001599635.1 | RIKEN Center for Life<br>Science Technologies,<br>Division of Genomic<br>Technologies |
| 1709 | <i>Mrakia blollopis</i>              | Tremello     | Basidio   | 4 | 2 | 4 | 5 | 15 | GCA_000950635.1 | National Institute of<br>Advanced Industrial<br>Science and Technology<br>(AIST)      |
| 1710 | <i>Erythrobasidium hasegawianum</i>  | Cystobasidio | Basidio   | 4 | 2 | 2 | 7 | 15 | GCA_001972285.1 | RIKEN Center for Life<br>Science Technologies,<br>Division of Genomic<br>Technologies |
| 1711 | <i>Parasitella parasitica</i>        | Mucoro       | Mucoro    | 4 | 1 | 1 | 9 | 15 | GCA_000938895.1 | FRIEDRICH SCHILLER<br>UNIVERSITY JENA                                                 |
| 1712 | <i>Protomyces pachydermus</i>        | Taphrino     | Asco      | 5 | 5 | 0 | 5 | 15 | GCA_003717275.1 | University of Helsinki                                                                |
| 1713 | <i>Saitoella complicata</i>          | 0            | Asco      | 5 | 2 | 1 | 7 | 15 | GCA_000227095.3 | Saitoella complicata<br>genome sequencing<br>consortium                               |
| 1714 | <i>Protomyces sp. C29</i>            | Taphrino     | Asco      | 5 | 5 | 0 | 5 | 15 | GCA_003568695.1 | University of Helsinki                                                                |
| 1715 | <i>Rhodotorula sp. ZM1</i>           | Microbotryio | Basidio   | 4 | 0 | 2 | 9 | 15 | GCA_009806315.1 | Zhejiang Normal<br>University                                                         |
| 1716 | <i>Golovinomyces cichoracearum</i>   | Leotio       | Asco      | 4 | 3 | 2 | 6 | 15 | GCA_003611215.1 | University of Maryland                                                                |
| 1717 | <i>Synchytrium endobioticum</i>      | Chytridio    | Chytridio | 5 | 3 | 0 | 7 | 15 | GCA_006536045.1 | Agriculture and Agri-<br>Food Canada                                                  |
| 1718 | <i>Cryptococcus gattii VGII</i>      | Tremello     | Basidio   | 3 | 3 | 1 | 8 | 15 | GCA_003011995.1 | Jawaharlal Nehru Centre<br>for Advanced Scientific<br>Research                        |
| 1719 | <i>Amanita brunnescens</i>           | Agarico      | Basidio   | 4 | 3 | 1 | 7 | 15 | GCA_001691785.2 | Harvard University                                                                    |
| 1720 | <i>Amanita muscaria</i>              | Agarico      | Basidio   | 5 | 1 | 0 | 9 | 15 | GCA_000827485.1 | DOE Joint Genome<br>Institute                                                         |
| 1721 | <i>Amauroascus mutatus</i>           | Eurotio      | Asco      | 3 | 2 | 1 | 8 | 14 | GCA_001430935.1 | UC Berkeley                                                                           |

|      |                                          |              |         |   |   |   |   |    |                 |                                                                                                                                                                                                                                                                                                                                                                                                                                                                                                                                                                                                                                                                                                                                                                                       |
|------|------------------------------------------|--------------|---------|---|---|---|---|----|-----------------|---------------------------------------------------------------------------------------------------------------------------------------------------------------------------------------------------------------------------------------------------------------------------------------------------------------------------------------------------------------------------------------------------------------------------------------------------------------------------------------------------------------------------------------------------------------------------------------------------------------------------------------------------------------------------------------------------------------------------------------------------------------------------------------|
| 1722 | <i>Tilletia indica</i>                   | Exobasidio   | Basidio | 2 | 2 | 2 | 8 | 14 | GCA_001689995.1 | ICAR-Indian Institute of Wheat and Barley Research, Karnal<br>Broad Institute IGS<br>DOE Joint Genome Institute<br>RIKEN Center for Life Science Technologies, Division of Genomic Technologies<br>IGS<br>University College Dublin<br>Northwest A&F University<br>University of Helsinki<br>Malaysia Genome Institute<br>INRA-LIPM<br>Weill Cornell Medicine<br>Kunming University of Science and Technology<br>Michigan State University<br>Broad Institute<br>UC Berkeley<br>DOE Joint Genome Institute<br>University of Montana<br>Broad Institute<br>RIKEN Center for Life Science Technologies, Division of Genomic Technologies<br>Northwest A&F University<br>MAX PLANCK INSTITUTE FOR PLANT BREEDING RESEARCH<br>University of Miyazaki<br>IGS<br>DOE Joint Genome Institute |
| 1723 | <i>Mortierella verticillata</i>          | Mortierello  | Mucoro  | 3 | 3 | 0 | 8 | 14 | GCA_000739165.1 |                                                                                                                                                                                                                                                                                                                                                                                                                                                                                                                                                                                                                                                                                                                                                                                       |
| 1724 | <i>Mucor indicus</i>                     | Mucoro       | Mucoro  | 4 | 1 | 0 | 9 | 14 | GCA_000697295.1 |                                                                                                                                                                                                                                                                                                                                                                                                                                                                                                                                                                                                                                                                                                                                                                                       |
| 1725 | <i>Mucor lusitanicus</i>                 | Mucoro       | Mucoro  | 4 | 1 | 0 | 9 | 14 | GCA_010203745.1 |                                                                                                                                                                                                                                                                                                                                                                                                                                                                                                                                                                                                                                                                                                                                                                                       |
| 1726 | <i>Mucor circinelloides</i>              | Mucoro       | Mucoro  | 4 | 1 | 0 | 9 | 14 | GCA_001599575.1 |                                                                                                                                                                                                                                                                                                                                                                                                                                                                                                                                                                                                                                                                                                                                                                                       |
| 1727 | <i>Basidiobolus heterosporus</i>         | Basidiobolo  | Zoopago | 5 | 0 | 1 | 8 | 14 | GCA_000697455.1 |                                                                                                                                                                                                                                                                                                                                                                                                                                                                                                                                                                                                                                                                                                                                                                                       |
| 1728 | <i>Taphrina betulina</i>                 | Taphrino     | Asco    | 3 | 3 | 2 | 6 | 14 | GCA_008802775.1 |                                                                                                                                                                                                                                                                                                                                                                                                                                                                                                                                                                                                                                                                                                                                                                                       |
| 1729 | <i>Taphrina confusa</i>                  | Taphrino     | Asco    | 3 | 4 | 1 | 6 | 14 | GCA_005281535.1 |                                                                                                                                                                                                                                                                                                                                                                                                                                                                                                                                                                                                                                                                                                                                                                                       |
| 1730 | <i>Protomyces gravidus</i>               | Taphrino     | Asco    | 4 | 4 | 0 | 6 | 14 | GCA_003717255.1 |                                                                                                                                                                                                                                                                                                                                                                                                                                                                                                                                                                                                                                                                                                                                                                                       |
| 1731 | <i>Glaciozyma antarctica</i>             | Microbotryio | Basidio | 4 | 1 | 1 | 8 | 14 | GCA_002917775.1 |                                                                                                                                                                                                                                                                                                                                                                                                                                                                                                                                                                                                                                                                                                                                                                                       |
| 1732 | <i>Microbotryum violaceum</i>            | Microbotryio | Basidio | 4 | 2 | 1 | 7 | 14 | GCA_900015485.1 |                                                                                                                                                                                                                                                                                                                                                                                                                                                                                                                                                                                                                                                                                                                                                                                       |
| 1733 | <i>Cryptococcus neoformans AD hybrid</i> | Tremello     | Basidio | 4 | 2 | 0 | 8 | 14 | GCA_006992865.1 |                                                                                                                                                                                                                                                                                                                                                                                                                                                                                                                                                                                                                                                                                                                                                                                       |
| 1734 | <i>Sarcodon sp. MG97</i>                 | Agarico      | Basidio | 4 | 2 | 1 | 7 | 14 | GCA_003313065.1 |                                                                                                                                                                                                                                                                                                                                                                                                                                                                                                                                                                                                                                                                                                                                                                                       |
| 1735 | <i>Amanita phalloides</i>                | Agarico      | Basidio | 5 | 0 | 0 | 9 | 14 | GCA_001983385.1 |                                                                                                                                                                                                                                                                                                                                                                                                                                                                                                                                                                                                                                                                                                                                                                                       |
| 1736 | <i>Kwoniella mangrovensis</i>            | Tremello     | Basidio | 3 | 3 | 2 | 6 | 14 | GCA_000507485.3 |                                                                                                                                                                                                                                                                                                                                                                                                                                                                                                                                                                                                                                                                                                                                                                                       |
| 1737 | <i>Amauroascus niger</i>                 | Eurotio      | Asco    | 2 | 2 | 1 | 8 | 13 | GCA_001430945.1 |                                                                                                                                                                                                                                                                                                                                                                                                                                                                                                                                                                                                                                                                                                                                                                                       |
| 1738 | <i>Mortierella elongata</i>              | Mortierello  | Mucoro  | 2 | 3 | 1 | 7 | 13 | GCA_001651415.1 |                                                                                                                                                                                                                                                                                                                                                                                                                                                                                                                                                                                                                                                                                                                                                                                       |
| 1739 | <i>fungal sp. Mo6-1</i>                  | 0            | 0       | 3 | 2 | 2 | 6 | 13 | GCA_002939055.1 |                                                                                                                                                                                                                                                                                                                                                                                                                                                                                                                                                                                                                                                                                                                                                                                       |
| 1740 | <i>Nannizzia gypsea</i>                  | Eurotio      | Asco    | 4 | 1 | 0 | 8 | 13 | GCA_000150975.2 |                                                                                                                                                                                                                                                                                                                                                                                                                                                                                                                                                                                                                                                                                                                                                                                       |
| 1741 | <i>Holtermannia corniformis</i>          | Tremello     | Basidio | 4 | 2 | 1 | 6 | 13 | GCA_001599935.1 |                                                                                                                                                                                                                                                                                                                                                                                                                                                                                                                                                                                                                                                                                                                                                                                       |
| 1742 | <i>Taphrina pruni</i>                    | Taphrino     | Asco    | 2 | 5 | 1 | 5 | 13 | GCA_005281585.1 |                                                                                                                                                                                                                                                                                                                                                                                                                                                                                                                                                                                                                                                                                                                                                                                       |
| 1743 | <i>Blumeria graminis</i>                 | Leotio       | Asco    | 3 | 2 | 1 | 7 | 13 | GCA_900237765.1 |                                                                                                                                                                                                                                                                                                                                                                                                                                                                                                                                                                                                                                                                                                                                                                                       |
| 1744 | <i>Taphrina flavorubra</i>               | Taphrino     | Asco    | 2 | 5 | 1 | 5 | 13 | GCA_000836175.1 |                                                                                                                                                                                                                                                                                                                                                                                                                                                                                                                                                                                                                                                                                                                                                                                       |
| 1745 | <i>Saksenaea vasiformis</i>              | Mucoro       | Mucoro  | 5 | 0 | 0 | 8 | 13 | GCA_000697055.1 |                                                                                                                                                                                                                                                                                                                                                                                                                                                                                                                                                                                                                                                                                                                                                                                       |
| 1746 | <i>Pisolithus tinctorius</i>             | Agarico      | Basidio | 4 | 0 | 1 | 8 | 13 | GCA_000827335.1 |                                                                                                                                                                                                                                                                                                                                                                                                                                                                                                                                                                                                                                                                                                                                                                                       |



|      |                                     |               |              |   |   |   |   |    |                 |                                                                     |
|------|-------------------------------------|---------------|--------------|---|---|---|---|----|-----------------|---------------------------------------------------------------------|
| 1747 | <i>Pisolithus microcarpus</i>       | Agarico       | Basidio      | 3 | 2 | 1 | 7 | 13 | GCA_000827275.1 | JGI                                                                 |
| 1748 | <i>Blyttiomycetes helicus</i>       | Chytridio     | Chytridio    | 4 | 2 | 0 | 7 | 13 | GCA_003614705.1 | DOE Joint Genome Institute                                          |
| 1749 | <i>Rhizophagus clarus</i>           | Glomero       | Mucoro       | 3 | 1 | 0 | 9 | 13 | GCA_003203555.1 | National Institute for Basic Biology                                |
| 1750 | <i>Arthroderma uncinatum</i>        | Eurotio       | Asco         | 3 | 1 | 1 | 7 | 12 | GCA_011692745.1 | Chinese Academy of Medical Science and Peking Union Medical College |
| 1751 | <i>Absidia glauca</i>               | Mucoro        | Mucoro       | 3 | 1 | 1 | 7 | 12 | GCA_900079185.1 | FRIEDRICH SCHILLER UNIVERSITY JENA                                  |
| 1752 | <i>Piedraia hortae</i>              | Dothideo      | Asco         | 2 | 2 | 4 | 4 | 12 | GCA_010093745.1 | DOE Joint Genome Institute                                          |
| 1753 | <i>Cunninghamella bertholletiae</i> | Mucoro        | Mucoro       | 3 | 2 | 0 | 7 | 12 | GCA_000697215.1 | IGS                                                                 |
| 1754 | <i>Cunninghamella elegans</i>       | Mucoro        | Mucoro       | 3 | 2 | 0 | 7 | 12 | GCA_000697015.1 | IGS                                                                 |
| 1755 | <i>Taphrina communis</i>            | Taphrino      | Asco         | 2 | 4 | 1 | 5 | 12 | GCA_005281525.1 | Northwest A&F University                                            |
| 1756 | <i>Cokeromyces recurvatus</i>       | Mucoro        | Mucoro       | 4 | 0 | 0 | 8 | 12 | GCA_000697235.1 | IGS                                                                 |
| 1757 | <i>Gigaspora rosea</i>              | Glomero       | Mucoro       | 3 | 2 | 0 | 7 | 12 | GCA_003550325.1 | INRA                                                                |
| 1758 | <i>Allomyces macrogynus</i>         | Blastocladio  | Blastocladio | 1 | 4 | 3 | 4 | 12 | GCA_000151295.1 | Broad Institute                                                     |
| 1759 | <i>Gigaspora margarita</i>          | Glomero       | Mucoro       | 4 | 2 | 0 | 6 | 12 | GCA_009809945.1 | CNR                                                                 |
| 1760 | <i>Taphrina sp. SM11</i>            | Taphrino      | Asco         | 3 | 3 | 2 | 4 | 12 | GCA_004000165.1 | University of Helsinki                                              |
| 1761 | <i>Cryptococcus gattii VGI</i>      | Tremello      | Basidio      | 3 | 1 | 1 | 7 | 12 | GCA_000836355.1 | Broad Institute                                                     |
| 1762 | <i>Cryptococcus gattii VGIV</i>     | Tremello      | Basidio      | 3 | 1 | 1 | 7 | 12 | GCA_000835755.1 | Broad Institute                                                     |
| 1763 | <i>Oidium heveae</i>                | Leotio        | Asco         | 3 | 2 | 0 | 7 | 12 | GCA_003957845.1 | Hainan University                                                   |
| 1764 | <i>Golubevia sp. BC0902</i>         | Exobasidio    | Basidio      | 3 | 2 | 0 | 7 | 12 | GCA_012976205.1 | Wageningen UR                                                       |
| 1765 | <i>Amanita inopinata</i>            | Agarico       | Basidio      | 4 | 1 | 0 | 7 | 12 | GCA_001691775.3 | Harvard University                                                  |
| 1766 | <i>Amanita pseudoporphyria</i>      | Agarico       | Basidio      | 5 | 0 | 0 | 7 | 12 | GCA_003316615.1 | Kunming University of Science and Technology                        |
| 1767 | <i>Microsporium canis</i>           | Eurotio       | Asco         | 2 | 2 | 1 | 6 | 11 | GCA_000151145.1 | Broad Institute                                                     |
| 1768 | <i>Absidia repens</i>               | Mucoro        | Mucoro       | 2 | 1 | 0 | 8 | 11 | GCA_002105175.1 | DOE Joint Genome Institute                                          |
| 1769 | <i>Mortierella sp. BCC40632</i>     | Mortierello   | Mucoro       | 3 | 1 | 0 | 7 | 11 | GCA_011634665.1 | National Center for Genetic Engineering and Biotechnology           |
| 1770 | <i>Hesseltinella vesiculosa</i>     | Mucoro        | Mucoro       | 3 | 0 | 0 | 8 | 11 | GCA_002104935.1 | DOE Joint Genome Institute                                          |
| 1771 | <i>Uncinocarpus reesii</i>          | Eurotio       | Asco         | 3 | 1 | 1 | 6 | 11 | GCA_000003515.2 | Broad Institute                                                     |
| 1772 | <i>Saksenaea oblongispora</i>       | Mucoro        | Mucoro       | 4 | 0 | 0 | 7 | 11 | GCA_000697495.1 | IGS                                                                 |
| 1773 | <i>Rhodotorula sp. JG-1b</i>        | Microbotryio  | Basidio      | 2 | 2 | 1 | 6 | 11 | GCA_001541205.1 | DOE Joint Genome Institute                                          |
| 1774 | <i>Taphrina deformans</i>           | Taphrino      | Asco         | 3 | 2 | 1 | 5 | 11 | GCA_005281805.1 | Northwest A&F University                                            |
| 1775 | <i>Conidiobolus incongruus</i>      | Entomophthoro | Zoopago      | 2 | 1 | 1 | 7 | 11 | GCA_000697335.1 | IGS                                                                 |

|      |                                    |              |         |   |   |   |   |    |                 |                                                                                                       |
|------|------------------------------------|--------------|---------|---|---|---|---|----|-----------------|-------------------------------------------------------------------------------------------------------|
| 1776 | <i>Glomus cerebriforme</i>         | Glomero      | Mucoro  | 2 | 1 | 0 | 8 | 11 | GCA_003833025.1 | University of Ottawa                                                                                  |
| 1777 | <i>Cryptococcus cf. gattii</i>     | Tremello     | Basidio | 2 | 2 | 1 | 6 | 11 | GCA_009650685.1 | Broad Institute                                                                                       |
| 1778 | <i>Cryptococcus gattii</i> VGIII   | Tremello     | Basidio | 2 | 2 | 1 | 6 | 11 | GCA_000836335.1 | Broad Institute                                                                                       |
| 1779 | <i>Golubevia sp. BC0812</i>        | Exobasidio   | Basidio | 3 | 2 | 0 | 6 | 11 | GCA_012976215.1 | Wageningen UR                                                                                         |
| 1780 | <i>Golubevia sp. BC0850</i>        | Exobasidio   | Basidio | 3 | 2 | 0 | 6 | 11 | GCA_012976225.1 | Wageningen UR                                                                                         |
| 1781 | <i>Oidium neolycopersici</i>       | Leotio       | Asco    | 4 | 1 | 0 | 6 | 11 | GCA_003610855.1 | University of Maryland                                                                                |
| 1782 | <i>Oehlia diaphana</i>             | Glomero      | Mucoro  | 2 | 1 | 0 | 8 | 11 | GCA_003833135.1 | University of Ottawa<br>NIBB core research<br>facilities, National<br>Institutes for Basic<br>Biology |
| 1783 | <i>Rhizophagus irregularis</i>     | Glomero      | Mucoro  | 2 | 1 | 0 | 8 | 11 | GCA_002897155.1 | INRA                                                                                                  |
| 1784 | <i>Rhizophagus sp. MUCL 43196</i>  | Glomero      | Mucoro  | 2 | 1 | 0 | 8 | 11 | GCA_003549995.1 | Harvard University                                                                                    |
| 1785 | <i>Amanita polyphyramis</i>        | Agarico      | Basidio | 3 | 0 | 0 | 8 | 11 | GCA_001691755.2 | North-Western State<br>Medical University<br>named after I.I.<br>Mechnicov                            |
| 1786 | <i>Trichophyton mentagrophytes</i> | Eurotio      | Asco    | 2 | 2 | 0 | 6 | 10 | GCA_003664465.1 | UC Berkeley                                                                                           |
| 1787 | <i>Bysoonygena ceratinophila</i>   | Eurotio      | Asco    | 3 | 1 | 0 | 6 | 10 | GCA_001430925.1 | Swiss Institute of<br>Bioinformatics                                                                  |
| 1788 | <i>Trichophyton benhamiae</i>      | Eurotio      | Asco    | 2 | 2 | 0 | 6 | 10 | GCA_001858085.1 | Lawrence Livermore<br>National Laboratory                                                             |
| 1789 | <i>Rhodotorula taiwanensis</i>     | Microbotryio | Basidio | 2 | 1 | 1 | 6 | 10 | GCA_002922495.1 | TGen North                                                                                            |
| 1790 | <i>Coccidioides immitis</i>        | Eurotio      | Asco    | 2 | 1 | 1 | 6 | 10 | GCA_004115165.2 | IGS                                                                                                   |
| 1791 | <i>Apophysomyces trapeziformis</i> | Mucoro       | Mucoro  | 4 | 0 | 0 | 6 | 10 | GCA_000696975.1 | IGS                                                                                                   |
| 1792 | <i>Apophysomyces elegans</i>       | Mucoro       | Mucoro  | 4 | 0 | 0 | 6 | 10 | GCA_000696995.1 | IGS                                                                                                   |
| 1793 | <i>Rhodotorula mucilaginosa</i>    | Microbotryio | Basidio | 2 | 2 | 0 | 6 | 10 | GCA_003055205.1 | Indian Institute Of<br>Chemical biology                                                               |
| 1794 | <i>Taphrina wiesneri</i>           | Taphrino     | Asco    | 2 | 3 | 0 | 5 | 10 | GCA_005281515.1 | Northwest A&F<br>University                                                                           |
| 1795 | <i>Linderina pennispora</i>        | Kickxello    | Zoopago | 1 | 3 | 1 | 5 | 10 | GCA_002104995.1 | DOE Joint Genome<br>Institute                                                                         |
| 1796 | <i>Malassezia furfur</i>           | Malassezio   | Basidio | 2 | 1 | 0 | 7 | 10 | GCA_002551515.1 | University of Utrecht                                                                                 |
| 1797 | <i>Wallemia ichthyophaga</i>       | Wallemio     | Basidio | 4 | 1 | 0 | 5 | 10 | GCA_004918895.1 | Biotechnical Faculty,<br>University of Ljubljana                                                      |
| 1798 | <i>Diversispora epigaea</i>        | Glomero      | Mucoro  | 2 | 1 | 0 | 7 | 10 | GCA_003547095.1 | Cornell University                                                                                    |
| 1799 | <i>Neolecta irregularis</i>        | Neolecto     | Asco    | 2 | 2 | 1 | 5 | 10 | GCA_001929475.1 | University of California,<br>Riverside                                                                |
| 1800 | <i>Malassezia obtusa</i>           | Malassezio   | Basidio | 2 | 1 | 0 | 7 | 10 | GCA_001264985.1 | Genome Institute of<br>Singapore                                                                      |
| 1801 | <i>Kwoniella pini</i>              | Tremello     | Basidio | 2 | 2 | 2 | 4 | 10 | GCA_000512605.2 | Broad Institute                                                                                       |
| 1802 | <i>Golubevia pallescens</i>        | Exobasidio   | Basidio | 3 | 2 | 0 | 5 | 10 | GCA_001599655.1 | RIKEN Center for Life<br>Science Technologies,<br>Division of Genomic<br>Technologies                 |

|      |                                    |               |         |   |   |   |   |    |                 |                                                                              |
|------|------------------------------------|---------------|---------|---|---|---|---|----|-----------------|------------------------------------------------------------------------------|
| 1803 | <i>Malassezia globosa</i>          | Malassezio    | Basidio | 3 | 0 | 0 | 7 | 10 | GCA_001264805.1 | Genome Institute of Singapore                                                |
| 1804 | <i>Trichophyton rubrum</i>         | Eurotio       | Asco    | 2 | 1 | 0 | 6 | 9  | GCA_000616845.1 | Broad Institute                                                              |
| 1805 | <i>Trichophyton soudanense</i>     | Eurotio       | Asco    | 2 | 1 | 0 | 6 | 9  | GCA_000616865.1 | Broad Institute                                                              |
| 1806 | <i>Trichophyton interdigitale</i>  | Eurotio       | Asco    | 2 | 1 | 0 | 6 | 9  | GCA_000622975.1 | Broad Institute                                                              |
| 1807 | <i>Trichophyton kuryangei</i>      | Eurotio       | Asco    | 2 | 1 | 0 | 6 | 9  | GCA_012184535.1 | Belgian Coordinated Collection of Microorganisms, BCCM                       |
| 1808 | <i>Trichophyton equinum</i>        | Eurotio       | Asco    | 2 | 1 | 0 | 6 | 9  | GCA_000151175.1 | Broad Institute                                                              |
| 1809 | <i>Trichophyton tonsurans</i>      | Eurotio       | Asco    | 2 | 1 | 0 | 6 | 9  | GCA_000151455.1 | Broad Institute                                                              |
| 1810 | <i>Trichophyton violaceum</i>      | Eurotio       | Asco    | 2 | 1 | 0 | 6 | 9  | GCA_001651435.1 | Chinese Academy of Medical Science & Peking Union Medical College            |
| 1811 | <i>Trichophyton yaoundei</i>       | Eurotio       | Asco    | 2 | 1 | 0 | 6 | 9  | GCA_012184575.1 | Belgian Coordinated Collection of Microorganisms, BCCM                       |
| 1812 | <i>Trichophyton verrucosum</i>     | Eurotio       | Asco    | 2 | 1 | 0 | 6 | 9  | GCA_000151505.1 | Arthroderma Genome Sequencing Consortium                                     |
| 1813 | <i>Onygena corvina</i>             | Eurotio       | Asco    | 2 | 1 | 0 | 6 | 9  | GCA_000812245.1 | Aalborg University                                                           |
| 1814 | <i>Rhodotorula sp. CCFEE 5036</i>  | Microbotryio  | Basidio | 2 | 1 | 0 | 6 | 9  | GCA_005059875.1 | University of California, Riverside                                          |
| 1815 | <i>Apophysomyces variabilis</i>    | Mucoro        | Mucoro  | 3 | 0 | 0 | 6 | 9  | GCA_002749535.1 | Postgraduate Institute of medical education and research                     |
| 1816 | <i>Ophidiomyces ophiodiicola</i>   | Eurotio       | Asco    | 3 | 0 | 0 | 6 | 9  | GCA_002167195.1 | University of Arizona                                                        |
| 1817 | <i>Taphrina populina</i>           | Taphrino      | Asco    | 2 | 3 | 0 | 4 | 9  | GCA_000836195.1 | University of Miyazaki                                                       |
| 1818 | <i>Lobosporangium transversale</i> | Mortierello   | Mucoro  | 2 | 1 | 0 | 6 | 9  | GCA_002105155.1 | DOE Joint Genome Institute                                                   |
| 1819 | <i>fungal sp. ARF18</i>            | 0             | 0       | 2 | 1 | 0 | 6 | 9  | GCA_002224055.1 | University of Arkansas                                                       |
| 1820 | <i>Entomophthora muscae</i>        | Entomophthoro | Zoopago | 2 | 0 | 0 | 7 | 9  | GCA_900018355.1 | UNIVERSITY OF COPENHAGEN                                                     |
| 1821 | <i>Conidiobolus coronatus</i>      | Entomophthoro | Zoopago | 2 | 1 | 0 | 6 | 9  | GCA_001566745.1 | JGI-PSF                                                                      |
| 1822 | <i>Puccinia triticina</i>          | Puccinio      | Basidio | 4 | 0 | 0 | 5 | 9  | GCA_013090125.1 | University of Sydney                                                         |
| 1823 | <i>Malassezia cuniculi</i>         | Malassezio    | Basidio | 3 | 0 | 0 | 6 | 9  | GCA_001264635.1 | Genome Institute of Singapore                                                |
| 1824 | <i>Erysiphe necator</i>            | Leotio        | Asco    | 3 | 0 | 0 | 6 | 9  | GCA_000798715.1 | University of California, Davis                                              |
| 1825 | <i>Massospora cicadina</i>         | Entomophthoro | Zoopago | 2 | 0 | 0 | 7 | 9  | GCA_006912075.1 | University of Michigan                                                       |
| 1826 | <i>Cystobasidium pallidum</i>      | Cystobasidio  | Basidio | 2 | 0 | 2 | 5 | 9  | GCA_001599955.1 | RIKEN Center for Life Science Technologies, Division of Genomic Technologies |
| 1827 | <i>Erysiphe pisi</i>               | Leotio        | Asco    | 3 | 1 | 0 | 5 | 9  | GCA_000208805.1 | Max-Planck-Institute for Plant Breeding Research                             |

|      |                                      |             |           |   |   |   |   |   |                 |                                                                              |
|------|--------------------------------------|-------------|-----------|---|---|---|---|---|-----------------|------------------------------------------------------------------------------|
| 1828 | <i>Malassezia caprae</i>             | Malassezio  | Basidio   | 3 | 0 | 0 | 6 | 9 | GCA_001264625.1 | Genome Institute of Singapore                                                |
| 1829 | <i>Puccinia striiformis</i>          | Puccinio    | Basidio   | 4 | 1 | 1 | 3 | 9 | GCA_011750755.1 | Australian National University                                               |
| 1830 | <i>Wallemia mellicola</i>            | Wallemio    | Basidio   | 4 | 0 | 0 | 5 | 9 | GCA_004919005.1 | Biotechnical Faculty, University of Ljubljana                                |
| 1831 | <i>Mixia osmundae</i>                | Mixio       | Basidio   | 2 | 0 | 0 | 6 | 8 | GCA_000708205.1 | DOE Joint Genome Institute                                                   |
| 1832 | <i>Spizellomyces sp. 'palustris'</i> | Chytridio   | Chytridio | 4 | 0 | 0 | 4 | 8 | GCA_006535965.1 | Agriculture and Agri-Food Canada                                             |
| 1833 | <i>Coemansia reversa</i>             | Kickxello   | Zoopago   | 1 | 2 | 0 | 5 | 8 | GCA_002705745.1 | JGI                                                                          |
| 1834 | <i>Zoopage sp. CT-All</i>            | Zoopago     | Zoopago   | 1 | 0 | 3 | 4 | 8 | GCA_004114245.1 | University of Michigan                                                       |
| 1835 | <i>Sporidiobolus pararoseus</i>      | Microbotryo | Basidio   | 2 | 0 | 1 | 5 | 8 | GCA_010758995.1 | Shenyang Agricultural University                                             |
| 1836 | <i>Puccinia novopanic</i>            | Puccinio    | Basidio   | 3 | 0 | 0 | 5 | 8 | GCA_004348175.1 | Noble Research Institute                                                     |
| 1837 | <i>Amanita bisporigera</i>           | Agarico     | Basidio   | 2 | 0 | 0 | 6 | 8 | GCA_001983365.1 | Michigan State University                                                    |
| 1838 | <i>Malassezia japonica</i>           | Malassezio  | Basidio   | 2 | 0 | 0 | 6 | 8 | GCA_001600795.1 | RIKEN Center for Life Science Technologies, Division of Genomic Technologies |
| 1839 | <i>Malassezia equina</i>             | Malassezio  | Basidio   | 2 | 0 | 0 | 6 | 8 | GCA_001264685.1 | Genome Institute of Singapore                                                |
| 1840 | <i>Malassezia sympodialis</i>        | Malassezio  | Basidio   | 2 | 0 | 0 | 6 | 8 | GCA_001264715.1 | Genome Institute of Singapore                                                |
| 1841 | <i>Malassezia dermatis</i>           | Malassezio  | Basidio   | 2 | 0 | 0 | 6 | 8 | GCA_001600775.1 | RIKEN Center for Life Science Technologies, Division of Genomic Technologies |
| 1842 | <i>Malassezia restricta</i>          | Malassezio  | Basidio   | 2 | 0 | 0 | 6 | 8 | GCA_001264725.1 | Genome Institute of Singapore                                                |
| 1843 | <i>Phaeotremella fagi</i>            | Tremello    | Basidio   | 1 | 0 | 3 | 4 | 8 | GCA_001599715.1 | RIKEN Center for Life Science Technologies, Division of Genomic Technologies |
| 1844 | <i>Spizellomyces punctatus</i>       | Chytridio   | Chytridio | 3 | 0 | 0 | 4 | 7 | GCA_000182565.2 | Broad Institute                                                              |
| 1845 | <i>Puccinia coronata</i>             | Puccinio    | Basidio   | 3 | 0 | 0 | 4 | 7 | GCA_002873275.1 | University of Minnesota                                                      |
| 1846 | <i>Puccinia sorghi</i>               | Puccinio    | Basidio   | 3 | 0 | 0 | 4 | 7 | GCA_001263375.1 | BIA - FCEN - UBA                                                             |
| 1847 | <i>Malassezia slooffiae</i>          | Malassezio  | Basidio   | 2 | 0 | 0 | 5 | 7 | GCA_010577765.1 | Jawaharlal Nehru Centre for Advanced Scientific Research                     |
| 1848 | <i>Amanita jacksonii</i>             | Agarico     | Basidio   | 2 | 0 | 0 | 5 | 7 | GCA_000497225.1 | University of Toronto                                                        |
| 1849 | <i>Puccinia horiana</i>              | Puccinio    | Basidio   | 3 | 0 | 0 | 4 | 7 | GCA_001624995.1 | National Academy of Agricultural Science                                     |

|      |                                       |                |              |   |   |   |   |   |                 |                                                                              |
|------|---------------------------------------|----------------|--------------|---|---|---|---|---|-----------------|------------------------------------------------------------------------------|
| 1850 | <i>Cryptococcus depauperatus</i>      | Tremello       | Basidio      | 2 | 0 | 1 | 4 | 7 | GCA_001720245.1 | Broad Institute                                                              |
| 1851 | <i>Malassezia nana</i>                | Malassezio     | Basidio      | 2 | 0 | 0 | 5 | 7 | GCA_001600835.1 | RIKEN Center for Life Science Technologies, Division of Genomic Technologies |
| 1852 | <i>Malassezia vespertilionis</i>      | Malassezio     | Basidio      | 1 | 0 | 0 | 6 | 7 | GCA_002818225.1 | US Forest Service                                                            |
| 1853 | <i>Malassezia pachydermatis</i>       | Malassezio     | Basidio      | 2 | 0 | 0 | 5 | 7 | GCA_001264975.1 | Genome Institute of Singapore                                                |
| 1854 | <i>Malassezia sp.</i>                 | Malassezio     | Basidio      | 2 | 0 | 0 | 5 | 7 | GCA_004026415.1 | Jill Banfield's Lab at Berkeley                                              |
| 1855 | <i>Malassezia yamatoensis</i>         | Malassezio     | Basidio      | 1 | 0 | 0 | 6 | 7 | GCA_001264885.1 | Genome Institute of Singapore                                                |
| 1856 | <i>Homolaphlyctis polyrhiza</i>       | Chytridio      | Chytridio    | 1 | 0 | 0 | 5 | 6 | GCA_000235945.1 | University of Idaho, Initiative for Bioinformatics and Evolutionary Studies  |
| 1857 | <i>Syncephalis pseudoplumigaleata</i> | Zoopago        | Zoopago      | 2 | 1 | 0 | 3 | 6 | GCA_003614755.1 | DOE Joint Genome Institute                                                   |
| 1858 | <i>Smittium mucronatum</i>            | Harpello       | Zoopago      | 0 | 2 | 1 | 3 | 6 | GCA_001953115.1 | University of Toronto                                                        |
| 1859 | <i>Catenaria anguillulae</i>          | Blastocladio   | Blastocladio | 1 | 1 | 1 | 3 | 6 | GCA_002102555.1 | DOE Joint Genome Institute                                                   |
| 1860 | <i>Massospora platypediae</i>         | Entomophthoro  | Zoopago      | 3 | 0 | 0 | 3 | 6 | GCA_006912095.1 | University of California, Riverside                                          |
| 1861 | <i>Puccinia graminis</i>              | Puccinio       | Basidio      | 2 | 0 | 0 | 4 | 6 | GCA_008522505.1 | University of Minnesota                                                      |
| 1862 | <i>Phaffia rhodozyma</i>              | Tremello       | Basidio      | 1 | 1 | 0 | 4 | 6 | GCA_001600435.1 | RIKEN Center for Life Science Technologies, Division of Genomic Technologies |
| 1863 | <i>uncultured Malassezia</i>          | Malassezio     | Basidio      | 2 | 0 | 0 | 4 | 6 | GCA_903798065.1 | EBI                                                                          |
| 1864 | <i>Puccinia hordei</i>                | Puccinio       | Basidio      | 3 | 0 | 0 | 3 | 6 | GCA_007896445.1 | University of Sydney                                                         |
| 1865 | <i>Cochlonema odontosperma</i>        | Zoopago        | Zoopago      | 1 | 0 | 0 | 4 | 5 | GCA_004114315.1 | University of Michigan                                                       |
| 1866 | <i>Zancudomyces culisetae</i>         | Harpello       | Zoopago      | 1 | 1 | 0 | 3 | 5 | GCA_001969505.1 | University of Toronto                                                        |
| 1867 | <i>Acaulopage tetraceros</i>          | Zoopago        | Zoopago      | 1 | 0 | 0 | 4 | 5 | GCA_004114255.1 | University of Michigan                                                       |
| 1868 | <i>Thamnocephalis sphaerospora</i>    | Zoopago        | Zoopago      | 0 | 0 | 1 | 3 | 4 | GCA_003614735.1 | DOE Joint Genome Institute                                                   |
| 1869 | <i>Dimargaris cristalligena</i>       | Dimargarito    | Zoopago      | 1 | 1 | 0 | 2 | 4 | GCA_003614675.1 | DOE Joint Genome Institute                                                   |
| 1870 | <i>Batrachochytrium dendrobatidis</i> | Chytridio      | Chytridio    | 1 | 0 | 0 | 3 | 4 | GCA_003595275.1 | University of Otago                                                          |
| 1871 | <i>Smittium culicis</i>               | Harpello       | Zoopago      | 1 | 0 | 0 | 3 | 4 | GCA_001970855.1 | University of Toronto                                                        |
| 1872 | <i>Stylopaga hadra</i>                | Zoopago        | Zoopago      | 0 | 1 | 0 | 3 | 4 | GCA_005111325.1 | University of Michigan                                                       |
| 1873 | <i>Smittium megazygosporum</i>        | Harpello       | Zoopago      | 0 | 0 | 0 | 3 | 3 | GCA_003086715.1 | University of Toronto                                                        |
| 1874 | <i>Schizosaccharomyces japonicus</i>  | Schizosaccharo | Asco         | 0 | 1 | 0 | 2 | 3 | GCA_000149845.2 | Broad Institute                                                              |
| 1875 | <i>Smittium simulii</i>               | Harpello       | Zoopago      | 0 | 0 | 0 | 3 | 3 | GCA_003086735.1 | University of Toronto                                                        |
| 1876 | <i>Schizosaccharomyces octosporus</i> | Schizosaccharo | Asco         | 0 | 1 | 0 | 2 | 3 | GCA_000150505.2 | Broad Institute                                                              |

|      |                                          |                |               |   |   |   |   |   |                 |                                                                                                   |
|------|------------------------------------------|----------------|---------------|---|---|---|---|---|-----------------|---------------------------------------------------------------------------------------------------|
| 1877 | <i>Batrachochytrium salamandrivorans</i> | Chytridio      | Chytridio     | 0 | 0 | 0 | 3 | 3 | GCA_002006685.1 | Broad Institute                                                                                   |
| 1878 | <i>Piptocephalis cylindrospora</i>       | Zoopago        | Zoopago       | 1 | 0 | 0 | 2 | 3 | GCA_003614145.1 | DOE Joint Genome Institute                                                                        |
| 1879 | <i>Schizosaccharomyces cryophilus</i>    | Schizosaccharo | Asco          | 0 | 1 | 0 | 2 | 3 | GCA_000004155.2 | Broad Institute<br>Tree Aggressors                                                                |
| 1880 | <i>Cronartium ribicola</i>               | Puccinio       | Basidio       | 1 | 0 | 0 | 2 | 3 | GCA_000500245.1 | Identification using<br>Genomic Approaches                                                        |
| 1881 | <i>Herpomyces periplanetae</i>           | Laboulbenio    | Asco          | 2 | 0 | 0 | 1 | 3 | GCA_009733715.1 | University of Warsaw                                                                              |
| 1882 | <i>Tremella mesenterica</i>              | Tremello       | Basidio       | 0 | 0 | 0 | 3 | 3 | GCA_004117975.1 | Broad Institute                                                                                   |
| 1883 | <i>Smittium angustum</i>                 | Harpello       | Zoopago       | 0 | 0 | 0 | 2 | 2 | GCA_003097675.1 | University of Toronto                                                                             |
| 1884 | <i>Furculomyces boomerangus</i>          | Harpello       | Zoopago       | 0 | 0 | 0 | 2 | 2 | GCA_003086725.1 | University of Toronto                                                                             |
| 1885 | <i>Capniomyces stellatus</i>             | Harpello       | Zoopago       | 0 | 0 | 0 | 2 | 2 | GCA_001661515.1 | University of Toronto                                                                             |
| 1886 | <i>Schizosaccharomyces pombe</i>         | Schizosaccharo | Asco          | 0 | 0 | 0 | 2 | 2 | GCA_003086255.1 | Uppsala University                                                                                |
| 1887 | <i>Rozella allomycis</i>                 | 0              | Crypto        | 0 | 0 | 0 | 2 | 2 | GCA_000442015.1 | University of Michigan                                                                            |
| 1888 | <i>Melampsora medusae</i>                | Puccinio       | Basidio       | 1 | 1 | 0 | 0 | 2 | GCA_002157035.1 | BC Cancer Agency,<br>Canada's Michael Smith<br>Genome Sciences Centre                             |
| 1889 | <i>Nosema bombycis</i>                   | 0              | Microsporidia | 1 | 0 | 1 | 0 | 2 | GCA_000383075.1 | The Institute of<br>Sericulture and Systems<br>Biology (ISSB) of<br>Southwest University<br>(SWU) |
| 1890 | <i>Amphiamblys sp. WSBS2006</i>          | 0              | Microsporidia | 1 | 0 | 0 | 1 | 2 | GCA_001875675.1 | A.N. Belozersky Institute<br>of Physico-Chemical<br>Biology, Lomonosov<br>Moscow State University |
| 1891 | <i>Uromyces viciae-fabae</i>             | Puccinio       | Basidio       | 2 | 0 | 0 | 0 | 2 | GCA_000785685.1 | Universitaet Hohenheim                                                                            |
| 1892 | <i>Melampsora occidentalis</i>           | Puccinio       | Basidio       | 1 | 0 | 0 | 0 | 1 | GCA_002157085.1 | BC Cancer Agency,<br>Canada's Michael Smith<br>Genome Sciences Centre                             |
| 1893 | <i>Melampsora abietis-canadensis</i>     | Puccinio       | Basidio       | 1 | 0 | 0 | 0 | 1 | GCA_002157025.1 | BC Cancer Agency,<br>Canada's Michael Smith<br>Genome Sciences Centre                             |
| 1894 | <i>Melampsora larici-populina</i>        | Puccinio       | Basidio       | 1 | 0 | 0 | 0 | 1 | GCA_000204055.1 | US DOE Joint Genome<br>Institute (JGI-PGF)                                                        |
| 1895 | <i>Cronartium comandrae</i>              | Puccinio       | Basidio       | 0 | 0 | 0 | 1 | 1 | GCA_000464975.1 | Tree Aggressors<br>Identification using<br>Genomic Approaches                                     |
| 1896 | <i>Meira miltonrushii</i>                | Exobasidio     | Basidio       | 0 | 0 | 0 | 1 | 1 | GCA_003144205.1 | DOE Joint Genome<br>Institute                                                                     |
| 1897 | <i>Endocronartium harknessii</i>         | Puccinio       | Basidio       | 0 | 1 | 0 | 0 | 1 | GCA_000500795.1 | Tree Aggressors<br>Identification using<br>Genomic Approaches                                     |

|      |                                       |             |               |   |   |   |   |   |                 |                                                                                                            |
|------|---------------------------------------|-------------|---------------|---|---|---|---|---|-----------------|------------------------------------------------------------------------------------------------------------|
| 1898 | <i>Mitosporidium daphniae</i>         | 0           | Microsporidia | 0 | 0 | 0 | 1 | 1 | GCA_000760515.2 | Illinois Institute of Technology<br>BC Cancer Agency,<br>Canada's Michael Smith<br>Genome Sciences Centre  |
| 1899 | <i>Melampsora allii-populina</i>      | Puccinio    | Basidio       | 0 | 0 | 0 | 1 | 1 | GCA_002157005.1 | INRA-LIPM<br>University of Ottawa<br>BC Cancer Agency,<br>Canada's Michael Smith<br>Genome Sciences Centre |
| 1900 | <i>Microbotryum lychnidis-dioicae</i> | Microbotryo | Basidio       | 0 | 1 | 0 | 0 | 1 | GCA_001244265.1 | University of Michigan                                                                                     |
| 1901 | <i>Pseudoloma neurophilia</i>         | 0           | Microsporidia | 1 | 0 | 0 | 0 | 1 | GCA_001432165.1 | Jiangxi Agricultural<br>University<br>Broad Institute<br>Universite Clermont<br>Auvergne, CNRS UMR<br>6023 |
| 1902 | <i>Melampsora aecidioides</i>         | Puccinio    | Basidio       | 0 | 0 | 0 | 1 | 1 | GCA_002157015.1 | Broad Institute<br>University of California<br>San Diego                                                   |
| 1903 | <i>Paramicrosporidium saccamoebae</i> | 0           | Crypto        | 0 | 0 | 0 | 0 | 0 | GCA_002794465.1 | Illinois Institute of<br>Technology                                                                        |
| 1904 | <i>Nosema ceranae</i>                 | 0           | Microsporidia | 0 | 0 | 0 | 0 | 0 | GCA_004919615.1 | UNIVERSITY OF SYDNEY<br>Institute for Cell and<br>Molecular Biosciences,<br>Newcastle University           |
| 1905 | <i>Vavraia culicis</i>                | 0           | Microsporidia | 0 | 0 | 0 | 0 | 0 | GCA_000192795.1 | Illinois Institute of<br>Technology                                                                        |
| 1906 | <i>Tubulinosema ratisbonensis</i>     | 0           | Microsporidia | 0 | 0 | 0 | 0 | 0 | GCA_004000155.1 | Keeling lab, University of<br>British Columbia                                                             |
| 1907 | <i>Edhazardia aedis</i>               | 0           | Microsporidia | 0 | 0 | 0 | 0 | 0 | GCA_000230595.3 | Broad Institute<br>Tufts Cummings School<br>of Veterinary Medicine                                         |
| 1908 | <i>Nematocida displodere</i>          | 0           | Microsporidia | 0 | 0 | 0 | 0 | 0 | GCA_001642395.1 | Broad Institute<br>University of British<br>Columbia                                                       |
| 1909 | <i>Hamiltosporidium tvaerminensis</i> | 0           | Microsporidia | 0 | 0 | 0 | 0 | 0 | GCA_004325075.1 | University of Ottawa<br>Broad Institute                                                                    |
| 1910 | <i>Austropuccinia psidii</i>          | Puccinio    | Basidio       | 0 | 0 | 0 | 0 | 0 | GCA_902702905.1 | University of British<br>Columbia                                                                          |
| 1911 | <i>Trachipleistophora hominis</i>     | 0           | Microsporidia | 0 | 0 | 0 | 0 | 0 | GCA_000316135.1 | University of Ottawa<br>Broad Institute                                                                    |
| 1912 | <i>Hamiltosporidium magnivora</i>     | 0           | Microsporidia | 0 | 0 | 0 | 0 | 0 | GCA_004325065.1 | University of British<br>Columbia                                                                          |
| 1913 | <i>Encephalitozoon intestinalis</i>   | 0           | Microsporidia | 0 | 0 | 0 | 0 | 0 | GCA_000146465.1 | University of Ottawa<br>Broad Institute                                                                    |
| 1914 | <i>Nematocida parisii</i>             | 0           | Microsporidia | 0 | 0 | 0 | 0 | 0 | GCA_000190615.1 | University of British<br>Columbia                                                                          |
| 1915 | <i>Enterocytozoon bieneusi</i>        | 0           | Microsporidia | 0 | 0 | 0 | 0 | 0 | GCA_000209485.1 | University of Ottawa<br>Broad Institute                                                                    |
| 1916 | <i>Vittaforma corneae</i>             | 0           | Microsporidia | 0 | 0 | 0 | 0 | 0 | GCA_000231115.1 | University of British<br>Columbia                                                                          |
| 1917 | <i>Encephalitozoon hellem</i>         | 0           | Microsporidia | 0 | 0 | 0 | 0 | 0 | GCA_000277815.3 | University of Ottawa<br>Broad Institute                                                                    |
| 1918 | <i>Encephalitozoon romaleae</i>       | 0           | Microsporidia | 0 | 0 | 0 | 0 | 0 | GCA_000280035.2 | University of British<br>Columbia                                                                          |
| 1919 | <i>Nematocida sp. 1</i>               | 0           | Microsporidia | 0 | 0 | 0 | 0 | 0 | GCA_000738915.1 | University of Ottawa<br>Broad Institute                                                                    |
| 1920 | <i>Ordospora colligata</i>            | 0           | Microsporidia | 0 | 0 | 0 | 0 | 0 | GCA_000803265.1 | University of British<br>Columbia                                                                          |
| 1921 | <i>Encephalitozoon cuniculi</i>       | 0           | Microsporidia | 0 | 0 | 0 | 0 | 0 | GCA_001078035.1 | University of Ottawa<br>Broad Institute                                                                    |
| 1922 | <i>Nematocida sp. ERTm5</i>           | 0           | Microsporidia | 0 | 0 | 0 | 0 | 0 | GCA_001642415.1 | University of California<br>San Diego                                                                      |

|      |                                    |               |               |   |   |   |   |   |                 |                                                                              |
|------|------------------------------------|---------------|---------------|---|---|---|---|---|-----------------|------------------------------------------------------------------------------|
| 1923 | <i>Hemileia vastatrix</i>          | Puccinio      | Basidio       | 0 | 0 | 0 | 0 | 0 | GCA_004125335.1 | Universidade Federal de Lavras (UFLA)                                        |
| 1924 | <i>Antonospora locustae</i>        | 0             | Microsporidia | 0 | 0 | 0 | 0 | 0 | GCA_007674295.1 | Zhengzhou Normal University                                                  |
| 1925 | <i>Cronartium quercuum</i>         | Puccinio      | Basidio       | 0 | 0 | 0 | 0 | 0 | GCA_000500775.1 | Tree Aggressors Identification using Genomic Approaches                      |
| 1926 | <i>Pneumocystis jirovecii</i>      | Pneumocystido | Asco          | 0 | 0 | 0 | 0 | 0 | GCA_001477535.1 | Broad Institute                                                              |
| 1927 | <i>Hepatospora eriocheir</i>       | 0             | Microsporidia | 0 | 0 | 0 | 0 | 0 | GCA_002087885.1 | University of Exeter                                                         |
| 1928 | <i>Metchnikovella incurvata</i>    | 0             | Microsporidia | 0 | 0 | 0 | 0 | 0 | GCA_003600395.1 | SINGEK                                                                       |
| 1929 | <i>Enterocytozoon hepatopenaei</i> | 0             | Microsporidia | 0 | 0 | 0 | 0 | 0 | GCA_003709115.1 | Korea Research Institute of Bioscience & Biotechnology                       |
| 1930 | <i>Pneumocystis carinii</i>        | Pneumocystido | Asco          | 0 | 0 | 0 | 0 | 0 | GCA_001477545.1 | Broad Institute                                                              |
| 1931 | <i>Meira nashicola</i>             | Exobasidio    | Basidio       | 0 | 0 | 0 | 0 | 0 | GCA_001600355.1 | RIKEN Center for Life Science Technologies, Division of Genomic Technologies |
| 1932 | <i>Enterospora canceri</i>         | 0             | Microsporidia | 0 | 0 | 0 | 0 | 0 | GCA_002087915.1 | University of Exeter                                                         |



Table S3. Categorization of “Family;Function” data (EC number in relation to substrate associations. The Table displays the data in two ways: Two left columns lists the order according to ascending EC number; The four columns to the right lists the “Family;Function” organized per substrate. The term GENERAL indicates what the family generally is associated to a certain substrate, in case the identified group does not have a known molecular function.

| Function;family | Substrate        | Function:family substrate annotations encoded CAZymes |                |               |                |
|-----------------|------------------|-------------------------------------------------------|----------------|---------------|----------------|
|                 |                  | Cellulose                                             | Pectin         | Xylan         | Lignin         |
| GENERAL;AA1     | Lignin           | GENERAL;AA3                                           | 3.1.1.11;CE0   | GENERAL;AA14  | 1.10.3.*;AA1   |
| 1.10.3.2;AA1    | Lignin           | 1.1.99.18;AA3                                         | GENERAL;CE8    | 1.*.*;AA14    | GENERAL;AA2    |
| 1.10.3.*;AA1    | Lignin           | 1.1.3.4;AA3                                           | 3.1.1.11;CE8   | 3.1.1.72;CE1  | 1.11.1.13;AA2  |
| GENERAL;AA2     | Lignin           | 1.1.3.7;AA3                                           | 3.1.1.*;CE12   | GENERAL;CE2   | 1.11.1.16;AA2  |
| 1.11.1.13;AA2   | Lignin           | 1.1.3.13;AA3                                          | GENERAL;CE13   | 3.1.1.72;CE2  | 1.11.1.14;AA2  |
| 1.11.1.16;AA2   | Lignin           | 1.1.3.10;AA3                                          | 3.1.1.*;CE13   | GENERAL;CE3   | 1.11.1.*;AA2   |
| 1.11.1.14;AA2   | Lignin           | GENERAL;AA9                                           | 3.2.1.23;GH0   | 3.1.1.72;CE3  | 1.11.1.5;AA2   |
| 1.11.1.*;AA2    | Lignin           | 1.14.99.54;AA9                                        | 3.2.1.23;GH1   | 3.1.1.72;CE4  | GENERAL;AA3    |
| 1.11.1.5;AA2    | Lignin           | 1.14.99.56;AA9                                        | 3.2.1.23;GH2   | 3.1.1.72;CE5  | 1.1.99.18;AA3  |
| GENERAL;AA3     | Cellulose;Lignin | GENERAL;AA10                                          | 3.2.1.31;GH2   | GENERAL;CE6   | 1.1.3.4;AA3    |
| 1.1.99.18;AA3   | Cellulose;Lignin | 1.14.99.54;AA10                                       | 3.2.1.55;GH2   | 3.1.1.72;CE6  | 1.1.3.7;AA3    |
| 1.1.3.4;AA3     | Cellulose;Lignin | 1.14.99.56;AA10                                       | 3.2.1.*;GH2    | GENERAL;CE7   | 1.1.3.13;AA3   |
| 1.1.3.7;AA3     | Cellulose;Lignin | 1.14.99.53;AA10                                       | 3.2.1.*;GH2    | 3.1.1.72;CE7  | 1.1.3.10;AA3   |
| 1.1.3.13;AA3    | Cellulose;Lignin | GENERAL;AA15                                          | 3.2.1.55;GH3   | 3.1.1.72;CE12 | GENERAL;AA4    |
| 1.1.3.10;AA3    | Cellulose;Lignin | 1.14.99.54;AA15                                       | 3.2.1.164;GH5  | GENERAL;CE15  | 1.1.3.38;AA4   |
| GENERAL;AA4     | Lignin           | GENERAL;AA16                                          | 3.2.1.181;GH16 | 3.1.1.*;CE15  | GENERAL;AA5    |
| 1.1.3.38;AA4    | Lignin           | 1.14.99.54;AA16                                       | 3.2.1.22;GH27  | GENERAL;CE16  | 1.1.3.*;AA5    |
| GENERAL;AA5     | Lignin           | 3.2.1.4;GH0                                           | GENERAL;GH28   | 3.1.1.6;CE16  | 1.1.3.9;AA5    |
| 1.1.3.*;AA5     | Lignin           | 3.2.1.21;GH0                                          | 3.2.1.15;GH28  | 3.2.1.37;GH1  | 1.2.3.15;AA5   |
| 1.1.3.9;AA5     | Lignin           | 3.2.1.21;GH1                                          | 3.2.1.40;GH28  | 3.2.1.31;GH2  | 1.1.3.13;AA5   |
| 1.2.3.15;AA5    | Lignin           | 3.2.1.*;GH1                                           | 3.2.1.67;GH28  | 3.2.1.55;GH2  | GENERAL;AA6    |
| 1.1.3.13;AA5    | Lignin           | 3.2.1.21;GH3                                          | 3.2.1.82;GH28  | 3.2.1.37;GH2  | 1.6.5.6;AA6    |
| GENERAL;AA6     | Lignin           | 3.2.1.74;GH3                                          | 3.2.1.171;GH28 | 3.2.1.37;GH3  | GENERAL;AA8    |
| 1.6.5.6;AA6     | Lignin           | 3.2.1.4;GH5                                           | 3.2.1.173;GH28 | 3.2.1.55;GH3  | GENERAL;AA9    |
| GENERAL;AA8     | Lignin           | 3.2.1.21;GH5                                          | 3.2.1.*;GH28   | 3.2.1.8;GH5   | 1.14.99.54;AA9 |
| GENERAL;AA9     | Cellulose;Lignin | 3.2.1.74;GH5                                          | 3.2.1.164;GH30 | 3.2.1.8;GH8   | 1.14.99.56;AA9 |

|                 |                  |                |                 |                |
|-----------------|------------------|----------------|-----------------|----------------|
| 1.14.99.54;AA9  | Cellulose;Lignin | 3.2.1.91;GH5   | 3.2.1.*;GH33    | 3.2.1.156;GH8  |
| 1.14.99.56;AA9  | Cellulose;Lignin | GENERAL;GH6    | 3.2.1.23;GH35   | 3.2.1.8;GH10   |
| GENERAL;AA10    | Cellulose        | 3.2.1.4;GH6    | 3.2.1.*;GH35    | 3.2.1.32;GH10  |
| 1.14.99.54;AA10 | Cellulose        | 3.2.1.91;GH6   | 3.2.1.23;GH42   | 2.4.2.*;GH10   |
| 1.14.99.56;AA10 | Cellulose        | 3.2.1.4;GH7    | 3.2.1.*;GH42    | GENERAL;GH11   |
| 1.14.99.53;AA10 | Cellulose        | 3.2.1.176;GH7  | 3.2.1.55;GH43   | 3.2.1.8;GH11   |
| GENERAL;AA14    | Xylan            | 3.2.1.4;GH8    | 3.2.1.*;GH43    | 3.2.1.32;GH11  |
| 1.*.*.*;AA14    | Xylan            | 3.2.1.4;GH9    | 3.2.1.99;GH43   | 3.2.1.32;GH26  |
| GENERAL;AA15    | Cellulose        | 3.2.1.21;GH9   | 3.2.1.145;GH43  | 3.2.1.8;GH30   |
| 1.14.99.54;AA15 | Cellulose        | 3.2.1.73;GH9   | 3.2.1.55;GH51   | 3.2.1.37;GH30  |
| GENERAL;AA16    | Cellulose        | 3.2.1.74;GH9   | GENERAL;GH53    | 3.2.1.136;GH30 |
| 1.14.99.54;AA16 | Cellulose        | 3.2.1.91;GH9   | 3.2.1.89;GH53   | 3.2.1.*;GH30   |
| 3.1.1.11;CE0    | Pectin           | 3.2.1.4;GH10   | 3.2.1.55;GH54   | 3.2.1.177;GH31 |
| 3.1.1.72;CE1    | Xylan            | 3.2.1.4;GH12   | 3.2.1.23;GH59   | 3.2.1.37;GH39  |
| GENERAL;CE2     | Xylan            | 3.2.1.21;GH30  | 3.2.1.55;GH62   | 3.2.1.37;GH43  |
| 3.1.1.72;CE2    | Xylan            | 3.2.1.4;GH44   | GENERAL;GH78    | 3.2.1.55;GH43  |
| GENERAL;CE3     | Xylan            | 3.2.1.4;GH45   | 3.2.1.40;GH78   | 3.2.1.8;GH43   |
| 3.1.1.72;CE3    | Xylan            | 3.2.1.176;GH48 | 3.2.1.174;GH78  | 3.2.1.*;GH43   |
| 3.1.1.72;CE4    | Xylan            | 3.2.1.4;GH48   | 3.2.1.*;GH78    | GENERAL;GH51   |
| 3.1.1.72;CE5    | Xylan            | 3.2.1.4;GH51   | GENERAL;GH93    | 3.2.1.8;GH51   |
| GENERAL;CE6     | Xylan            | 3.2.1.4;GH74   | 3.2.1.*;GH93    | 3.2.1.37;GH51  |
| 3.1.1.72;CE6    | Xylan            | 3.2.1.21;GH116 | 3.2.1.*;GH95    | 3.2.1.55;GH51  |
| GENERAL;CE7     | Xylan            | GENERAL;GH124  | 3.2.1.172;GH105 | GENERAL;GH52   |
| 3.1.1.72;CE7    | Xylan            | 3.2.1.4;GH124  | 3.2.1.*;GH105   | 3.2.1.37;GH52  |
| GENERAL;CE8     | Pectin           |                | GENERAL;GH106   | GENERAL;GH54   |
| 3.1.1.11;CE8    | Pectin           |                | 3.2.1.40;GH106  | 3.2.1.55;GH54  |
| 3.1.1.*;CE12    | Pectin           |                | 3.2.1.174;GH106 | 3.2.1.37;GH54  |
| 3.1.1.72;CE12   | Xylan            |                | 3.2.1.185;GH127 | GENERAL;GH62   |
| GENERAL;CE13    | Pectin           |                | 3.2.1.*;GH127   | 3.2.1.55;GH62  |
| 3.1.1.*;CE13    | Pectin           |                | 3.2.1.185;GH137 | GENERAL;GH67   |
| GENERAL;CE15    | Xylan            |                | 3.2.1.185;GH137 | 3.2.1.139;GH67 |

|               |           |                 |                 |
|---------------|-----------|-----------------|-----------------|
| 3.1.1.*;CE15  | Xylan     | GENERAL;GH138   | 3.2.1.131;GH67  |
| GENERAL;CE16  | Xylan     | 3.2.1.173;GH138 | 3.2.1.8;GH98    |
| 3.1.1.6;CE16  | Xylan     | GENERAL;GH139   | GENERAL;GH115   |
| 3.2.1.23;GH0  | Pectin    | 3.2.1.*;GH139   | 3.2.1.131;GH115 |
| 3.2.1.4;GH0   | Cellulose | GENERAL;GH140   | 3.2.1.*;GH115   |
| 3.2.1.21;GH0  | Cellulose | 3.2.1.*;GH140   | 3.2.1.37;GH116  |
| 3.2.1.21;GH1  | Cellulose | 3.2.1.51;GH141  | GENERAL;GH120   |
| 3.2.1.23;GH1  | Pectin    | GENERAL;GH142   | 3.2.1.37;GH120  |
| 3.2.1.37;GH1  | Xylan     | 3.2.1.185;GH142 | 3.2.1.8;GH141   |
| 3.2.1.*;GH1   | Cellulose | GENERAL;GH143   |                 |
| 3.2.1.23;GH2  | Pectin    | 3.2.1.*;GH143   |                 |
| 3.2.1.31;GH2  | Xylan     | GENERAL;GH145   |                 |
| 3.2.1.31;GH2  | Pectin    | 3.2.1.*;GH145   |                 |
| 3.2.1.55;GH2  | Xylan     | GENERAL;GH146   |                 |
| 3.2.1.55;GH2  | Pectin    | 3.2.1.185;GH146 |                 |
| 3.2.1.*;GH2   | Pectin    | 3.2.1.185;GH146 |                 |
| 3.2.1.*;GH2   | Pectin    | GENERAL;GH147   |                 |
| 3.2.1.37;GH2  | Xylan     | 3.2.1.23;GH147  |                 |
| 3.2.1.21;GH3  | Cellulose | GENERAL;GH160   |                 |
| 3.2.1.37;GH3  | Xylan     | 3.2.1.*;GH160   |                 |
| 3.2.1.55;GH3  | Xylan     | GENERAL;GH165   |                 |
| 3.2.1.55;GH3  | Pectin    | 3.2.1.23;GH165  |                 |
| 3.2.1.74;GH3  | Cellulose | GENERAL;PL1     |                 |
| 3.2.1.4;GH5   | Cellulose | 4.2.2.2;PL1     |                 |
| 3.2.1.8;GH5   | Xylan     | 4.2.2.9;PL1     |                 |
| 3.2.1.21;GH5  | Cellulose | 4.2.2.10;PL1    |                 |
| 3.2.1.74;GH5  | Cellulose | GENERAL;PL2     |                 |
| 3.2.1.91;GH5  | Cellulose | 4.2.2.2;PL2     |                 |
| 3.2.1.164;GH5 | Pectin    | 4.2.2.9;PL2     |                 |
| GENERAL;GH6   | Cellulose | GENERAL;PL3     |                 |
| 3.2.1.4;GH6   | Cellulose | 4.2.2.2;PL3     |                 |

|                |           |               |
|----------------|-----------|---------------|
| 3.2.1.91;GH6   | Cellulose | GENERAL;PL4   |
| 3.2.1.4;GH7    | Cellulose | 4.2.2.23;PL4  |
| 3.2.1.176;GH7  | Cellulose | GENERAL;PL9   |
| 3.2.1.4;GH8    | Cellulose | 4.2.2.2;PL9   |
| 3.2.1.8;GH8    | Xylan     | 4.2.2.9;PL9   |
| 3.2.1.156;GH8  | Xylan     | 4.2.2.23;PL9  |
| 3.2.1.4;GH9    | Cellulose | GENERAL;PL10  |
| 3.2.1.21;GH9   | Cellulose | 4.2.2.2;PL10  |
| 3.2.1.73;GH9   | Cellulose | GENERAL;PL11  |
| 3.2.1.74;GH9   | Cellulose | 4.2.2.23;PL11 |
| 3.2.1.91;GH9   | Cellulose | 4.2.2.24;PL11 |
| 3.2.1.8;GH10   | Xylan     | GENERAL;PL22  |
| 3.2.1.32;GH10  | Xylan     | 4.2.2.6;PL22  |
| 2.4.2.*;GH10   | Xylan     | GENERAL;PL26  |
| 3.2.1.4;GH10   | Cellulose | 4.2.2.24;PL26 |
| GENERAL;GH11   | Xylan     | GENERAL;PL27  |
| 3.2.1.8;GH11   | Xylan     | 4.2.2.*;PL27  |
| 3.2.1.32;GH11  | Xylan     |               |
| 3.2.1.4;GH12   | Cellulose |               |
| 3.2.1.181;GH16 | Pectin    |               |
| 3.2.1.32;GH26  | Xylan     |               |
| 3.2.1.22;GH27  | Pectin    |               |
| GENERAL;GH28   | Pectin    |               |
| 3.2.1.15;GH28  | Pectin    |               |
| 3.2.1.40;GH28  | Pectin    |               |
| 3.2.1.67;GH28  | Pectin    |               |
| 3.2.1.82;GH28  | Pectin    |               |
| 3.2.1.171;GH28 | Pectin    |               |
| 3.2.1.173;GH28 | Pectin    |               |
| 3.2.1.*;GH28   | Pectin    |               |
| 3.2.1.8;GH30   | Xylan     |               |

|                |           |
|----------------|-----------|
| 3.2.1.21;GH30  | Cellulose |
| 3.2.1.37;GH30  | Xylan     |
| 3.2.1.136;GH30 | Xylan     |
| 3.2.1.164;GH30 | Pectin    |
| 3.2.1.*;GH30   | Xylan     |
| 3.2.1.177;GH31 | Xylan     |
| 3.2.1.*;GH33   | Pectin    |
| 3.2.1.23;GH35  | Pectin    |
| 3.2.1.*;GH35   | Pectin    |
| 3.2.1.37;GH39  | Xylan     |
| 3.2.1.23;GH42  | Pectin    |
| 3.2.1.*;GH42   | Pectin    |
| 3.2.1.37;GH43  | Xylan     |
| 3.2.1.55;GH43  | Pectin    |
| 3.2.1.55;GH43  | Xylan     |
| 3.2.1.8;GH43   | Xylan     |
| 3.2.1.*;GH43   | Xylan     |
| 3.2.1.*;GH43   | Pectin    |
| 3.2.1.99;GH43  | Pectin    |
| 3.2.1.145;GH43 | Pectin    |
| 3.2.1.4;GH44   | Cellulose |
| 3.2.1.4;GH45   | Cellulose |
| 3.2.1.176;GH48 | Cellulose |
| 3.2.1.4;GH48   | Cellulose |
| GENERAL;GH51   | Xylan     |
| 3.2.1.4;GH51   | Cellulose |
| 3.2.1.8;GH51   | Xylan     |
| 3.2.1.37;GH51  | Xylan     |
| 3.2.1.55;GH51  | Xylan     |
| 3.2.1.55;GH51  | Pectin    |
| GENERAL;GH52   | Xylan     |

|                 |           |
|-----------------|-----------|
| 3.2.1.37;GH52   | Xylan     |
| GENERAL;GH53    | Pectin    |
| 3.2.1.89;GH53   | Pectin    |
| GENERAL;GH54    | Xylan     |
| 3.2.1.55;GH54   | Xylan     |
| 3.2.1.55;GH54   | Pectin    |
| 3.2.1.37;GH54   | Xylan     |
| 3.2.1.23;GH59   | Pectin    |
| GENERAL;GH62    | Xylan     |
| 3.2.1.55;GH62   | Xylan     |
| 3.2.1.55;GH62   | Pectin    |
| GENERAL;GH67    | Xylan     |
| 3.2.1.139;GH67  | Xylan     |
| 3.2.1.131;GH67  | Xylan     |
| 3.2.1.4;GH74    | Cellulose |
| GENERAL;GH78    | Pectin    |
| 3.2.1.40;GH78   | Pectin    |
| 3.2.1.174;GH78  | Pectin    |
| 3.2.1.*;GH78    | Pectin    |
| GENERAL;GH93    | Pectin    |
| 3.2.1.*;GH93    | Pectin    |
| 3.2.1.*;GH95    | Pectin    |
| 3.2.1.8;GH98    | Xylan     |
| 3.2.1.172;GH105 | Pectin    |
| 3.2.1.*;GH105   | Pectin    |
| GENERAL;GH106   | Pectin    |
| 3.2.1.40;GH106  | Pectin    |
| 3.2.1.174;GH106 | Pectin    |
| GENERAL;GH115   | Xylan     |
| 3.2.1.131;GH115 | Xylan     |
| 3.2.1.*;GH115   | Xylan     |

|                 |           |
|-----------------|-----------|
| 3.2.1.21;GH116  | Cellulose |
| 3.2.1.37;GH116  | Xylan     |
| GENERAL;GH120   | Xylan     |
| 3.2.1.37;GH120  | Xylan     |
| GENERAL;GH124   | Cellulose |
| 3.2.1.4;GH124   | Cellulose |
| 3.2.1.185;GH127 | Pectin    |
| 3.2.1.*;GH127   | Pectin    |
| 3.2.1.185;GH137 | Pectin    |
| 3.2.1.185;GH137 | Pectin    |
| GENERAL;GH138   | Pectin    |
| 3.2.1.173;GH138 | Pectin    |
| GENERAL;GH139   | Pectin    |
| 3.2.1.*;GH139   | Pectin    |
| GENERAL;GH140   | Pectin    |
| 3.2.1.*;GH140   | Pectin    |
| 3.2.1.51;GH141  | Pectin    |
| 3.2.1.8;GH141   | Xylan     |
| GENERAL;GH142   | Pectin    |
| 3.2.1.185;GH142 | Pectin    |
| GENERAL;GH143   | Pectin    |
| 3.2.1.*;GH143   | Pectin    |
| GENERAL;GH145   | Pectin    |
| 3.2.1.*;GH145   | Pectin    |
| GENERAL;GH146   | Pectin    |
| 3.2.1.185;GH146 | Pectin    |
| 3.2.1.185;GH146 | Pectin    |
| GENERAL;GH147   | Pectin    |
| 3.2.1.23;GH147  | Pectin    |
| GENERAL;GH160   | Pectin    |
| 3.2.1.*;GH160   | Pectin    |

|                |        |
|----------------|--------|
| GENERAL;GH165  | Pectin |
| 3.2.1.23;GH165 | Pectin |
| GENERAL;PL1    | Pectin |
| 4.2.2.2;PL1    | Pectin |
| 4.2.2.9;PL1    | Pectin |
| 4.2.2.10;PL1   | Pectin |
| GENERAL;PL2    | Pectin |
| 4.2.2.2;PL2    | Pectin |
| 4.2.2.9;PL2    | Pectin |
| GENERAL;PL3    | Pectin |
| 4.2.2.2;PL3    | Pectin |
| GENERAL;PL4    | Pectin |
| 4.2.2.23;PL4   | Pectin |
| GENERAL;PL9    | Pectin |
| 4.2.2.2;PL9    | Pectin |
| 4.2.2.9;PL9    | Pectin |
| 4.2.2.23;PL9   | Pectin |
| GENERAL;PL10   | Pectin |
| 4.2.2.2;PL10   | Pectin |
| GENERAL;PL11   | Pectin |
| 4.2.2.23;PL11  | Pectin |
| 4.2.2.24;PL11  | Pectin |
| GENERAL;PL22   | Pectin |
| 4.2.2.6;PL22   | Pectin |
| GENERAL;PL26   | Pectin |
| 4.2.2.24;PL26  | Pectin |
| GENERAL;PL27   | Pectin |
| 4.2.2.*;PL27   | Pectin |
